# Supplementary material for: One-Pot Synthesis of 1,5-Diketones under a Transition-Metal-Free Condition: Application in the Synthesis of 2,4,6-Triaryl Pyridine Derivatives
Source: PubMed Central journal article supplement — ACS Omega. 2021 Mar 9;6(11):7296–311. doi: 10.1021/acsomega.0c05328 (PMC7992091; doi:10.1021/acsomega.0c05328), 2021-03-09
Supplement: ao0c05328_si_002.pdf [file ao0c05328_si_002.pdf]

*Supplementary Information*

*for*

**One-pot Synthesis of 1, 5-Diketones under Transition-Metal-free Condition:  
Application in the Synthesis of 2,4,6-Triaryl Pyridine Derivatives**

Kesatebrhan Haile Asressu, Chieh-Kai Chan, Cheng-Chung Wang\*  
*Institute of Chemistry, Academia Sinica Taipei 115, Taiwan*

E-mail: wangcc@chem.sinica.edu.tw

|      |                                                                                                |             |
|------|------------------------------------------------------------------------------------------------|-------------|
| I.   | Crystal data for compounds <b>3o</b> , <b>3q</b> , <b>3t</b> , <b>4e</b> , and <b>4r</b> ..... | S-2~S-47    |
| II.  | <sup>1</sup> H and <sup>13</sup> C NMR spectra for compounds <b>3a-t</b> .....                 | S-48~S-87   |
| III. | <sup>1</sup> H and <sup>13</sup> C NMR spectra for compounds <b>4a-t</b> .....                 | S-88~S-128  |
| IV.  | <sup>1</sup> H and <sup>13</sup> C NMR spectra for compounds <b>5a-e</b> .....                 | S-129~S-137 |

## Crystal data and structure refinement for compound **3o**

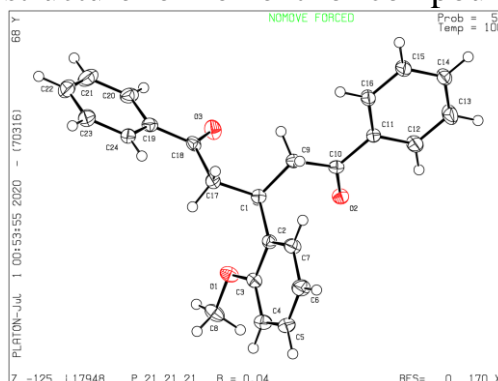

**Figure S1.** Single X-ray crystal structure of 1, 5-dicarbonyls **3o** (the thermal ellipsoid was drawn at the 50% probability level)

**Table S1. Crystal data and structure refinement for i17948**

|                                   |                                                |          |
|-----------------------------------|------------------------------------------------|----------|
| CCDC                              | 2031225                                        |          |
| Identification code               | i17948                                         |          |
| Empirical formula                 | C <sub>24</sub> H <sub>22</sub> O <sub>3</sub> |          |
| Formula weight                    | 358.41                                         |          |
| Temperature                       | 100.0(2) K                                     |          |
| Wavelength                        | 1.54178 Å                                      |          |
| Crystal system                    | Orthorhombic                                   |          |
| Space group                       | P 21 21 21                                     |          |
| Unit cell dimensions              | a = 5.2961(2) Å                                | α = 90°. |
|                                   | b = 17.1066(5) Å                               | β = 90°. |
|                                   | c = 20.7005(6) Å                               | γ = 90°. |
| Volume                            | 1875.43(10) Å <sup>3</sup>                     |          |
| Z, Density (calculated)           | 4, 1.269 Mg/m <sup>3</sup>                     |          |
| Absorption coefficient            | 0.658 mm <sup>-1</sup>                         |          |
| F(000)                            | 760                                            |          |
| Crystal size                      | 0.272 x 0.156 x 0.116 mm <sup>3</sup>          |          |
| Theta range for data collection   | 3.351 to 66.664°.                              |          |
| Index ranges                      | -6 ≤ h ≤ 5, -20 ≤ k ≤ 20, -24 ≤ l ≤ 24         |          |
| Reflections collected             | 13354                                          |          |
| Independent reflections           | 3308 [R(int) = 0.0638]                         |          |
| Completeness to theta = 66.664°   | 99.6 %                                         |          |
| Absorption correction             | Numerical                                      |          |
| Max. and min. transmission        | 1 and 0.7968                                   |          |
| Refinement method                 | Full-matrix least-squares on F <sup>2</sup>    |          |
| Data / restraints / parameters    | 3308 / 0 / 249                                 |          |
| Goodness-of-fit on F <sup>2</sup> | 1.056                                          |          |
| Final R indices [I > 2σ(I)]       | R1 = 0.0353, wR2 = 0.0855                      |          |

|                              |                                    |
|------------------------------|------------------------------------|
| R indices (all data)         | R1 = 0.0397, wR2 = 0.0879          |
| Absolute structure parameter | 0.4(3)                             |
| Extinction coefficient       | n/a                                |
| Largest diff. peak and hole  | 0.146 and -0.151 e.Å <sup>-3</sup> |

**Table S2. Atomic coordinates ( x 10<sup>4</sup>) and equivalent isotropic displacement parameters (Å<sup>2</sup>x 10<sup>3</sup>) for i17948. U(eq) is defined as one third of the trace of the orthogonalized U<sup>ij</sup> tensor.**

|       | x        | y       | z       | U(eq) |
|-------|----------|---------|---------|-------|
| O(1)  | 66(3)    | 3522(1) | 4372(1) | 25(1) |
| O(2)  | -166(3)  | 5877(1) | 4024(1) | 23(1) |
| O(3)  | 2518(3)  | 5121(1) | 5904(1) | 30(1) |
| C(1)  | 3104(4)  | 4808(1) | 4595(1) | 19(1) |
| C(2)  | 3220(4)  | 4357(1) | 3961(1) | 19(1) |
| C(3)  | 1636(4)  | 3711(1) | 3865(1) | 20(1) |
| C(4)  | 1720(4)  | 3281(1) | 3295(1) | 25(1) |
| C(5)  | 3465(5)  | 3485(1) | 2816(1) | 26(1) |
| C(6)  | 5083(5)  | 4106(1) | 2906(1) | 29(1) |
| C(7)  | 4932(5)  | 4539(1) | 3479(1) | 24(1) |
| C(8)  | -1625(4) | 2887(1) | 4282(1) | 29(1) |
| C(9)  | 3822(4)  | 5669(1) | 4528(1) | 18(1) |
| C(10) | 1864(4)  | 6156(1) | 4186(1) | 18(1) |
| C(11) | 2421(4)  | 7001(1) | 4064(1) | 18(1) |
| C(12) | 754(5)   | 7431(1) | 3684(1) | 30(1) |
| C(13) | 1168(5)  | 8225(1) | 3576(2) | 36(1) |
| C(14) | 3249(4)  | 8591(1) | 3843(1) | 26(1) |
| C(15) | 4918(5)  | 8167(1) | 4218(1) | 30(1) |
| C(16) | 4511(4)  | 7370(1) | 4326(1) | 26(1) |
| C(17) | 4771(4)  | 4411(1) | 5099(1) | 20(1) |
| C(18) | 4234(4)  | 4668(1) | 5786(1) | 20(1) |
| C(19) | 5787(4)  | 4342(1) | 6321(1) | 22(1) |
| C(20) | 5006(5)  | 4486(1) | 6956(1) | 28(1) |
| C(21) | 6358(5)  | 4182(2) | 7471(1) | 38(1) |
| C(22) | 8505(5)  | 3735(2) | 7363(1) | 37(1) |
| C(23) | 9300(5)  | 3585(2) | 6733(1) | 33(1) |
| C(24) | 7939(5)  | 3888(1) | 6216(1) | 24(1) |

**Table S3. Bond lengths [Å] and angles [°] for i17948.**

---

|             |          |
|-------------|----------|
| O(1)-C(3)   | 1.378(3) |
| O(1)-C(8)   | 1.420(3) |
| O(2)-C(10)  | 1.224(3) |
| O(3)-C(18)  | 1.220(3) |
| C(1)-C(2)   | 1.522(3) |
| C(1)-C(17)  | 1.527(3) |
| C(1)-C(9)   | 1.527(3) |
| C(1)-H(1)   | 1.0000   |
| C(2)-C(7)   | 1.385(3) |
| C(2)-C(3)   | 1.401(3) |
| C(3)-C(4)   | 1.391(3) |
| C(4)-C(5)   | 1.400(3) |
| C(4)-H(4)   | 0.9500   |
| C(5)-C(6)   | 1.378(3) |
| C(5)-H(5)   | 0.9500   |
| C(6)-C(7)   | 1.399(3) |
| C(6)-H(6)   | 0.9500   |
| C(7)-H(7)   | 0.9500   |
| C(8)-H(8A)  | 0.9800   |
| C(8)-H(8B)  | 0.9800   |
| C(8)-H(8C)  | 0.9800   |
| C(9)-C(10)  | 1.506(3) |
| C(9)-H(9A)  | 0.9900   |
| C(9)-H(9AB) | 0.9900   |
| C(10)-C(11) | 1.497(3) |
| C(11)-C(16) | 1.385(3) |
| C(11)-C(12) | 1.393(3) |
| C(12)-C(13) | 1.394(3) |
| C(12)-H(12) | 0.9500   |
| C(13)-C(14) | 1.383(3) |
| C(13)-H(13) | 0.9500   |
| C(14)-C(15) | 1.383(3) |
| C(14)-H(14) | 0.9500   |
| C(15)-C(16) | 1.399(3) |
| C(15)-H(15) | 0.9500   |
| C(16)-H(16) | 0.9500   |

|                 |            |
|-----------------|------------|
| C(17)-C(18)     | 1.515(3)   |
| C(17)-H(17A)    | 0.9900     |
| C(17)-H(17B)    | 0.9900     |
| C(18)-C(19)     | 1.487(3)   |
| C(19)-C(24)     | 1.396(3)   |
| C(19)-C(20)     | 1.401(3)   |
| C(20)-C(21)     | 1.386(4)   |
| C(20)-H(20)     | 0.9500     |
| C(21)-C(22)     | 1.389(4)   |
| C(21)-H(21)     | 0.9500     |
| C(22)-C(23)     | 1.395(4)   |
| C(22)-H(22)     | 0.9500     |
| C(23)-C(24)     | 1.390(3)   |
| C(23)-H(23)     | 0.9500     |
| C(24)-H(24)     | 0.9500     |
| C(3)-O(1)-C(8)  | 117.37(18) |
| C(2)-C(1)-C(17) | 109.86(17) |
| C(2)-C(1)-C(9)  | 113.65(18) |
| C(17)-C(1)-C(9) | 110.28(18) |
| C(2)-C(1)-H(1)  | 107.6      |
| C(17)-C(1)-H(1) | 107.6      |
| C(9)-C(1)-H(1)  | 107.6      |
| C(7)-C(2)-C(3)  | 117.8(2)   |
| C(7)-C(2)-C(1)  | 122.25(19) |
| C(3)-C(2)-C(1)  | 119.90(19) |
| O(1)-C(3)-C(4)  | 122.82(19) |
| O(1)-C(3)-C(2)  | 115.93(19) |
| C(4)-C(3)-C(2)  | 121.2(2)   |
| C(3)-C(4)-C(5)  | 119.4(2)   |
| C(3)-C(4)-H(4)  | 120.3      |
| C(5)-C(4)-H(4)  | 120.3      |
| C(6)-C(5)-C(4)  | 120.4(2)   |
| C(6)-C(5)-H(5)  | 119.8      |
| C(4)-C(5)-H(5)  | 119.8      |
| C(5)-C(6)-C(7)  | 119.2(2)   |
| C(5)-C(6)-H(6)  | 120.4      |
| C(7)-C(6)-H(6)  | 120.4      |
| C(2)-C(7)-C(6)  | 122.0(2)   |

|                    |            |
|--------------------|------------|
| C(2)-C(7)-H(7)     | 119.0      |
| C(6)-C(7)-H(7)     | 119.0      |
| O(1)-C(8)-H(8A)    | 109.5      |
| O(1)-C(8)-H(8B)    | 109.5      |
| H(8A)-C(8)-H(8B)   | 109.5      |
| O(1)-C(8)-H(8C)    | 109.5      |
| H(8A)-C(8)-H(8C)   | 109.5      |
| H(8B)-C(8)-H(8C)   | 109.5      |
| C(10)-C(9)-C(1)    | 113.85(17) |
| C(10)-C(9)-H(9A)   | 108.8      |
| C(1)-C(9)-H(9A)    | 108.8      |
| C(10)-C(9)-H(9AB)  | 108.8      |
| C(1)-C(9)-H(9AB)   | 108.8      |
| H(9A)-C(9)-H(9AB)  | 107.7      |
| O(2)-C(10)-C(11)   | 120.24(19) |
| O(2)-C(10)-C(9)    | 121.19(18) |
| C(11)-C(10)-C(9)   | 118.56(18) |
| C(16)-C(11)-C(12)  | 119.17(19) |
| C(16)-C(11)-C(10)  | 122.06(19) |
| C(12)-C(11)-C(10)  | 118.76(19) |
| C(11)-C(12)-C(13)  | 120.4(2)   |
| C(11)-C(12)-H(12)  | 119.8      |
| C(13)-C(12)-H(12)  | 119.8      |
| C(14)-C(13)-C(12)  | 120.1(2)   |
| C(14)-C(13)-H(13)  | 119.9      |
| C(12)-C(13)-H(13)  | 119.9      |
| C(15)-C(14)-C(13)  | 119.7(2)   |
| C(15)-C(14)-H(14)  | 120.1      |
| C(13)-C(14)-H(14)  | 120.1      |
| C(14)-C(15)-C(16)  | 120.3(2)   |
| C(14)-C(15)-H(15)  | 119.9      |
| C(16)-C(15)-H(15)  | 119.9      |
| C(11)-C(16)-C(15)  | 120.3(2)   |
| C(11)-C(16)-H(16)  | 119.9      |
| C(15)-C(16)-H(16)  | 119.9      |
| C(18)-C(17)-C(1)   | 113.83(17) |
| C(18)-C(17)-H(17A) | 108.8      |
| C(1)-C(17)-H(17A)  | 108.8      |

|                     |            |
|---------------------|------------|
| C(18)-C(17)-H(17B)  | 108.8      |
| C(1)-C(17)-H(17B)   | 108.8      |
| H(17A)-C(17)-H(17B) | 107.7      |
| O(3)-C(18)-C(19)    | 120.1(2)   |
| O(3)-C(18)-C(17)    | 120.8(2)   |
| C(19)-C(18)-C(17)   | 119.07(19) |
| C(24)-C(19)-C(20)   | 119.0(2)   |
| C(24)-C(19)-C(18)   | 123.0(2)   |
| C(20)-C(19)-C(18)   | 118.0(2)   |
| C(21)-C(20)-C(19)   | 120.3(2)   |
| C(21)-C(20)-H(20)   | 119.9      |
| C(19)-C(20)-H(20)   | 119.9      |
| C(20)-C(21)-C(22)   | 120.4(2)   |
| C(20)-C(21)-H(21)   | 119.8      |
| C(22)-C(21)-H(21)   | 119.8      |
| C(21)-C(22)-C(23)   | 120.0(2)   |
| C(21)-C(22)-H(22)   | 120.0      |
| C(23)-C(22)-H(22)   | 120.0      |
| C(24)-C(23)-C(22)   | 119.6(3)   |
| C(24)-C(23)-H(23)   | 120.2      |
| C(22)-C(23)-H(23)   | 120.2      |
| C(23)-C(24)-C(19)   | 120.7(2)   |
| C(23)-C(24)-H(24)   | 119.6      |
| C(19)-C(24)-H(24)   | 119.6      |

---

Symmetry transformations used to generate equivalent atoms:

**Table S4. Anisotropic displacement parameters ( $\text{\AA}^2 \times 10^3$ ) for i17948. The anisotropic displacement factor exponent takes the form:  $-2\pi^2 [ h^2 a^{*2} U^{11} + \dots + 2 h k a^* b^* U^{12} ]$**

|       | $U^{11}$ | $U^{22}$ | $U^{33}$ | $U^{23}$ | $U^{13}$ | $U^{12}$ |
|-------|----------|----------|----------|----------|----------|----------|
| O(1)  | 21(1)    | 23(1)    | 31(1)    | -3(1)    | 6(1)     | -5(1)    |
| O(2)  | 17(1)    | 24(1)    | 28(1)    | 0(1)     | -2(1)    | -4(1)    |
| O(3)  | 34(1)    | 27(1)    | 28(1)    | 1(1)     | 10(1)    | 9(1)     |
| C(1)  | 16(1)    | 20(1)    | 20(1)    | -1(1)    | 2(1)     | -1(1)    |
| C(2)  | 18(1)    | 18(1)    | 20(1)    | -1(1)    | 0(1)     | 1(1)     |
| C(3)  | 18(1)    | 19(1)    | 24(1)    | 0(1)     | 1(1)     | 0(1)     |
| C(4)  | 22(1)    | 24(1)    | 29(1)    | -5(1)    | -1(1)    | -1(1)    |
| C(5)  | 32(1)    | 26(1)    | 21(1)    | -5(1)    | -1(1)    | -1(1)    |
| C(6)  | 35(1)    | 29(1)    | 22(1)    | -3(1)    | 7(1)     | -3(1)    |
| C(7)  | 29(1)    | 22(1)    | 22(1)    | -2(1)    | 5(1)     | -4(1)    |
| C(8)  | 23(1)    | 21(1)    | 43(2)    | -2(1)    | 4(1)     | -4(1)    |
| C(9)  | 16(1)    | 19(1)    | 20(1)    | 0(1)     | 1(1)     | -2(1)    |
| C(10) | 16(1)    | 20(1)    | 18(1)    | -3(1)    | 3(1)     | -2(1)    |
| C(11) | 16(1)    | 19(1)    | 18(1)    | 0(1)     | 0(1)     | 0(1)     |
| C(12) | 23(1)    | 23(1)    | 42(1)    | 2(1)     | -13(1)   | -3(1)    |
| C(13) | 33(1)    | 25(1)    | 51(2)    | 10(1)    | -16(1)   | -2(1)    |
| C(14) | 26(1)    | 20(1)    | 31(1)    | 3(1)     | -3(1)    | -2(1)    |
| C(15) | 32(1)    | 23(1)    | 35(1)    | 5(1)     | -11(1)   | -9(1)    |
| C(16) | 26(1)    | 21(1)    | 32(1)    | 5(1)     | -10(1)   | -5(1)    |
| C(17) | 22(1)    | 20(1)    | 20(1)    | 0(1)     | 3(1)     | 1(1)     |
| C(18) | 24(1)    | 16(1)    | 21(1)    | 1(1)     | 6(1)     | -3(1)    |
| C(19) | 27(1)    | 21(1)    | 19(1)    | -2(1)    | 3(1)     | -5(1)    |
| C(20) | 34(1)    | 30(1)    | 20(1)    | -2(1)    | 3(1)     | -11(1)   |
| C(21) | 45(2)    | 47(2)    | 21(1)    | 2(1)     | -3(1)    | -19(1)   |
| C(22) | 43(2)    | 39(1)    | 28(1)    | 8(1)     | -12(1)   | -16(1)   |
| C(23) | 35(1)    | 30(1)    | 34(2)    | 3(1)     | -11(1)   | -6(1)    |
| C(24) | 29(1)    | 22(1)    | 23(1)    | 1(1)     | -5(1)    | -4(1)    |



## Crystal data and structure refinement for compound **3q**

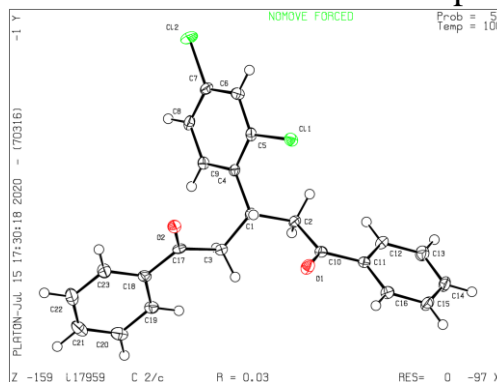

**Figure S2.** Single X-ray crystal structure of 1, 5-dicarbonyls **3q** (the thermal ellipsoid was drawn at the 50% probability level)

**Table S5. Crystal data and structure refinement for i17959.**

|                                   |                                                                |                             |
|-----------------------------------|----------------------------------------------------------------|-----------------------------|
| CCDC                              | 2031234                                                        |                             |
| Identification code               | i17959                                                         |                             |
| Empirical formula                 | C <sub>23</sub> H <sub>18</sub> Cl <sub>2</sub> O <sub>2</sub> |                             |
| Formula weight                    | 397.27                                                         |                             |
| Temperature                       | 100.0(2) K                                                     |                             |
| Wavelength                        | 1.54178 Å                                                      |                             |
| Crystal system                    | Monoclinic                                                     |                             |
| Space group                       | C 2/c                                                          |                             |
| Unit cell dimensions              | a = 22.7208(6) Å                                               | $\alpha = 90^\circ$ .       |
|                                   | b = 4.89590(10) Å                                              | $\beta = 91.140(2)^\circ$ . |
|                                   | c = 34.0185(10) Å                                              | $\gamma = 90^\circ$ .       |
| Z, Volume,                        | 8, 3783.43(17) Å <sup>3</sup>                                  |                             |
| Density (calculated)              | 1.395 Mg/m <sup>3</sup>                                        |                             |
| Absorption coefficient            | 3.207 mm <sup>-1</sup>                                         |                             |
| F(000)                            | 1648                                                           |                             |
| Crystal size                      | 0.194 x 0.081 x 0.043 mm <sup>3</sup>                          |                             |
| Theta range for data collection   | 3.892 to 65.204°.                                              |                             |
| Index ranges                      | -26<=h<=26, -5<=k<=5, -40<=l<=40                               |                             |
| Reflections collected             | 38496                                                          |                             |
| Independent reflections           | 3231 [R(int) = 0.0713]                                         |                             |
| Completeness to theta = 65.204°   | 99.9 %                                                         |                             |
| Absorption correction             | Numerical                                                      |                             |
| Max. and min. transmission        | 1 and 0.8202                                                   |                             |
| Refinement method                 | Full-matrix least-squares on F <sup>2</sup>                    |                             |
| Data / restraints / parameters    | 3231 / 0 / 244                                                 |                             |
| Goodness-of-fit on F <sup>2</sup> | 1.049                                                          |                             |
| Final R indices [I>2sigma(I)]     | R1 = 0.0302, wR2 = 0.0724                                      |                             |

|                             |                                    |
|-----------------------------|------------------------------------|
| R indices (all data)        | R1 = 0.0383, wR2 = 0.0770          |
| Extinction coefficient      | n/a                                |
| Largest diff. peak and hole | 0.241 and -0.284 e.Å <sup>-3</sup> |

**Table S6. Atomic coordinates ( x 10<sup>4</sup>) and equivalent isotropic displacement parameters (Å<sup>2</sup>x 10<sup>3</sup>) for i17959. U(eq) is defined as one third of the trace of the orthogonalized U<sup>ij</sup> tensor.**

|       | x       | y       | z       | U(eq) |
|-------|---------|---------|---------|-------|
| Cl(1) | 4795(1) | 8545(1) | 4502(1) | 19(1) |
| Cl(2) | 6684(1) | 3518(1) | 5133(1) | 33(1) |
| O(1)  | 3913(1) | 7291(3) | 3466(1) | 22(1) |
| O(2)  | 5856(1) | 7442(2) | 3366(1) | 19(1) |
| C(1)  | 4944(1) | 5024(3) | 3775(1) | 15(1) |
| C(2)  | 4339(1) | 3838(3) | 3877(1) | 15(1) |
| C(3)  | 5143(1) | 3881(3) | 3382(1) | 16(1) |
| C(4)  | 5387(1) | 4587(3) | 4110(1) | 14(1) |
| C(5)  | 5355(1) | 6130(3) | 4454(1) | 15(1) |
| C(6)  | 5746(1) | 5844(3) | 4769(1) | 19(1) |
| C(7)  | 6187(1) | 3910(4) | 4741(1) | 19(1) |
| C(8)  | 6237(1) | 2303(4) | 4411(1) | 19(1) |
| C(9)  | 5838(1) | 2657(3) | 4100(1) | 16(1) |
| C(10) | 3829(1) | 5317(3) | 3677(1) | 16(1) |
| C(11) | 3220(1) | 4303(3) | 3748(1) | 16(1) |
| C(12) | 3105(1) | 2213(4) | 4014(1) | 19(1) |
| C(13) | 2531(1) | 1346(4) | 4070(1) | 23(1) |
| C(14) | 2072(1) | 2520(4) | 3858(1) | 22(1) |
| C(15) | 2181(1) | 4605(4) | 3593(1) | 21(1) |
| C(16) | 2752(1) | 5513(4) | 3541(1) | 19(1) |
| C(17) | 5683(1) | 5281(3) | 3225(1) | 16(1) |
| C(18) | 5996(1) | 4018(3) | 2889(1) | 17(1) |
| C(19) | 5750(1) | 1855(4) | 2674(1) | 20(1) |
| C(20) | 6036(1) | 795(4)  | 2352(1) | 24(1) |
| C(21) | 6574(1) | 1849(4) | 2246(1) | 26(1) |
| C(22) | 6830(1) | 3956(4) | 2462(1) | 26(1) |
| C(23) | 6542(1) | 5054(4) | 2780(1) | 21(1) |

**Table S7. Bond lengths [Å] and angles [°] for i17959.**

---

|             |            |
|-------------|------------|
| Cl(1)-C(5)  | 1.7457(16) |
| Cl(2)-C(7)  | 1.7421(16) |
| O(1)-C(10)  | 1.221(2)   |
| O(2)-C(17)  | 1.223(2)   |
| C(1)-C(4)   | 1.520(2)   |
| C(1)-C(3)   | 1.529(2)   |
| C(1)-C(2)   | 1.537(2)   |
| C(1)-H(1)   | 1.0000     |
| C(2)-C(10)  | 1.516(2)   |
| C(2)-H(2A)  | 0.9900     |
| C(2)-H(2AB) | 0.9900     |
| C(3)-C(17)  | 1.513(2)   |
| C(3)-H(3A)  | 0.9900     |
| C(3)-H(3AB) | 0.9900     |
| C(4)-C(9)   | 1.396(2)   |
| C(4)-C(5)   | 1.397(2)   |
| C(5)-C(6)   | 1.386(2)   |
| C(6)-C(7)   | 1.382(2)   |
| C(6)-H(6)   | 0.9500     |
| C(7)-C(8)   | 1.376(2)   |
| C(8)-C(9)   | 1.390(2)   |
| C(8)-H(8)   | 0.9500     |
| C(9)-H(9)   | 0.9500     |
| C(10)-C(11) | 1.495(2)   |
| C(11)-C(12) | 1.393(2)   |
| C(11)-C(16) | 1.397(2)   |
| C(12)-C(13) | 1.389(2)   |
| C(12)-H(12) | 0.9500     |
| C(13)-C(14) | 1.383(2)   |
| C(13)-H(13) | 0.9500     |
| C(14)-C(15) | 1.385(3)   |
| C(14)-H(14) | 0.9500     |
| C(15)-C(16) | 1.386(2)   |
| C(15)-H(15) | 0.9500     |
| C(16)-H(16) | 0.9500     |
| C(17)-C(18) | 1.491(2)   |

|                   |            |
|-------------------|------------|
| C(18)-C(19)       | 1.396(2)   |
| C(18)-C(23)       | 1.398(2)   |
| C(19)-C(20)       | 1.387(2)   |
| C(19)-H(19)       | 0.9500     |
| C(20)-C(21)       | 1.382(3)   |
| C(20)-H(20)       | 0.9500     |
| C(21)-C(22)       | 1.388(3)   |
| C(21)-H(21)       | 0.9500     |
| C(22)-C(23)       | 1.384(2)   |
| C(22)-H(22)       | 0.9500     |
| C(23)-H(23)       | 0.9500     |
| C(4)-C(1)-C(3)    | 113.67(13) |
| C(4)-C(1)-C(2)    | 111.08(12) |
| C(3)-C(1)-C(2)    | 109.91(13) |
| C(4)-C(1)-H(1)    | 107.3      |
| C(3)-C(1)-H(1)    | 107.3      |
| C(2)-C(1)-H(1)    | 107.3      |
| C(10)-C(2)-C(1)   | 113.36(13) |
| C(10)-C(2)-H(2A)  | 108.9      |
| C(1)-C(2)-H(2A)   | 108.9      |
| C(10)-C(2)-H(2AB) | 108.9      |
| C(1)-C(2)-H(2AB)  | 108.9      |
| H(2A)-C(2)-H(2AB) | 107.7      |
| C(17)-C(3)-C(1)   | 113.58(13) |
| C(17)-C(3)-H(3A)  | 108.9      |
| C(1)-C(3)-H(3A)   | 108.9      |
| C(17)-C(3)-H(3AB) | 108.9      |
| C(1)-C(3)-H(3AB)  | 108.9      |
| H(3A)-C(3)-H(3AB) | 107.7      |
| C(9)-C(4)-C(5)    | 115.92(14) |
| C(9)-C(4)-C(1)    | 123.62(14) |
| C(5)-C(4)-C(1)    | 120.46(14) |
| C(6)-C(5)-C(4)    | 123.35(15) |
| C(6)-C(5)-Cl(1)   | 116.94(12) |
| C(4)-C(5)-Cl(1)   | 119.70(12) |
| C(7)-C(6)-C(5)    | 118.07(15) |
| C(7)-C(6)-H(6)    | 121.0      |
| C(5)-C(6)-H(6)    | 121.0      |

|                   |            |
|-------------------|------------|
| C(8)-C(7)-C(6)    | 121.30(15) |
| C(8)-C(7)-Cl(2)   | 119.88(13) |
| C(6)-C(7)-Cl(2)   | 118.82(13) |
| C(7)-C(8)-C(9)    | 119.10(15) |
| C(7)-C(8)-H(8)    | 120.4      |
| C(9)-C(8)-H(8)    | 120.4      |
| C(8)-C(9)-C(4)    | 122.25(15) |
| C(8)-C(9)-H(9)    | 118.9      |
| C(4)-C(9)-H(9)    | 118.9      |
| O(1)-C(10)-C(11)  | 120.87(15) |
| O(1)-C(10)-C(2)   | 121.07(14) |
| C(11)-C(10)-C(2)  | 118.06(14) |
| C(12)-C(11)-C(16) | 119.21(15) |
| C(12)-C(11)-C(10) | 122.39(15) |
| C(16)-C(11)-C(10) | 118.41(15) |
| C(13)-C(12)-C(11) | 120.23(16) |
| C(13)-C(12)-H(12) | 119.9      |
| C(11)-C(12)-H(12) | 119.9      |
| C(14)-C(13)-C(12) | 120.09(16) |
| C(14)-C(13)-H(13) | 120.0      |
| C(12)-C(13)-H(13) | 120.0      |
| C(13)-C(14)-C(15) | 120.14(16) |
| C(13)-C(14)-H(14) | 119.9      |
| C(15)-C(14)-H(14) | 119.9      |
| C(14)-C(15)-C(16) | 120.08(16) |
| C(14)-C(15)-H(15) | 120.0      |
| C(16)-C(15)-H(15) | 120.0      |
| C(15)-C(16)-C(11) | 120.24(16) |
| C(15)-C(16)-H(16) | 119.9      |
| C(11)-C(16)-H(16) | 119.9      |
| O(2)-C(17)-C(18)  | 120.47(14) |
| O(2)-C(17)-C(3)   | 120.53(14) |
| C(18)-C(17)-C(3)  | 118.99(14) |
| C(19)-C(18)-C(23) | 119.04(15) |
| C(19)-C(18)-C(17) | 121.58(15) |
| C(23)-C(18)-C(17) | 119.36(15) |
| C(20)-C(19)-C(18) | 120.58(16) |
| C(20)-C(19)-H(19) | 119.7      |

|                   |            |
|-------------------|------------|
| C(18)-C(19)-H(19) | 119.7      |
| C(21)-C(20)-C(19) | 119.77(17) |
| C(21)-C(20)-H(20) | 120.1      |
| C(19)-C(20)-H(20) | 120.1      |
| C(20)-C(21)-C(22) | 120.28(16) |
| C(20)-C(21)-H(21) | 119.9      |
| C(22)-C(21)-H(21) | 119.9      |
| C(23)-C(22)-C(21) | 120.19(17) |
| C(23)-C(22)-H(22) | 119.9      |
| C(21)-C(22)-H(22) | 119.9      |
| C(22)-C(23)-C(18) | 120.11(17) |
| C(22)-C(23)-H(23) | 119.9      |
| C(18)-C(23)-H(23) | 119.9      |

---

Symmetry transformations used to generate equivalent atoms:

**Table S8. Anisotropic displacement parameters ( $\text{\AA}^2 \times 10^3$ ) for i17959. The anisotropic displacement factor exponent takes the form:  $-2\pi^2 [ h^2 a^{*2} U^{11} + \dots + 2 h k a^* b^* U^{12} ]$**

|       | $U^{11}$ | $U^{22}$ | $U^{33}$ | $U^{23}$ | $U^{13}$ | $U^{12}$ |
|-------|----------|----------|----------|----------|----------|----------|
| Cl(1) | 20(1)    | 20(1)    | 17(1)    | 0(1)     | 1(1)     | 5(1)     |
| Cl(2) | 23(1)    | 52(1)    | 22(1)    | 1(1)     | -11(1)   | 7(1)     |
| O(1)  | 17(1)    | 25(1)    | 24(1)    | 9(1)     | -2(1)    | -2(1)    |
| O(2)  | 19(1)    | 21(1)    | 18(1)    | -2(1)    | 0(1)     | -2(1)    |
| C(1)  | 12(1)    | 17(1)    | 15(1)    | 1(1)     | -1(1)    | -1(1)    |
| C(2)  | 13(1)    | 18(1)    | 15(1)    | 1(1)     | -1(1)    | -1(1)    |
| C(3)  | 15(1)    | 20(1)    | 14(1)    | 0(1)     | -2(1)    | 0(1)     |
| C(4)  | 12(1)    | 16(1)    | 14(1)    | 2(1)     | 1(1)     | -4(1)    |
| C(5)  | 13(1)    | 16(1)    | 17(1)    | 2(1)     | 3(1)     | 1(1)     |
| C(6)  | 20(1)    | 22(1)    | 14(1)    | -1(1)    | 0(1)     | -2(1)    |
| C(7)  | 14(1)    | 28(1)    | 16(1)    | 4(1)     | -3(1)    | -2(1)    |
| C(8)  | 11(1)    | 22(1)    | 23(1)    | 4(1)     | 1(1)     | 2(1)     |
| C(9)  | 14(1)    | 18(1)    | 16(1)    | 0(1)     | 2(1)     | -2(1)    |
| C(10) | 16(1)    | 18(1)    | 14(1)    | -2(1)    | -1(1)    | 1(1)     |
| C(11) | 15(1)    | 19(1)    | 13(1)    | -4(1)    | -1(1)    | 0(1)     |
| C(12) | 15(1)    | 22(1)    | 19(1)    | 0(1)     | -3(1)    | 0(1)     |
| C(13) | 20(1)    | 24(1)    | 24(1)    | 1(1)     | 1(1)     | -3(1)    |
| C(14) | 13(1)    | 26(1)    | 26(1)    | -5(1)    | 1(1)     | -3(1)    |
| C(15) | 14(1)    | 25(1)    | 24(1)    | -3(1)    | -3(1)    | 3(1)     |
| C(16) | 18(1)    | 22(1)    | 17(1)    | -2(1)    | -2(1)    | 1(1)     |
| C(17) | 16(1)    | 19(1)    | 13(1)    | 3(1)     | -5(1)    | 2(1)     |
| C(18) | 18(1)    | 20(1)    | 13(1)    | 3(1)     | -2(1)    | 4(1)     |
| C(19) | 20(1)    | 23(1)    | 16(1)    | 1(1)     | -2(1)    | 1(1)     |
| C(20) | 31(1)    | 24(1)    | 17(1)    | -1(1)    | -3(1)    | 5(1)     |
| C(21) | 34(1)    | 26(1)    | 17(1)    | 2(1)     | 6(1)     | 11(1)    |
| C(22) | 23(1)    | 30(1)    | 25(1)    | 2(1)     | 8(1)     | 3(1)     |
| C(23) | 20(1)    | 24(1)    | 20(1)    | 1(1)     | 2(1)     | 0(1)     |

## Crystal data and structure refinement for compound **3t**

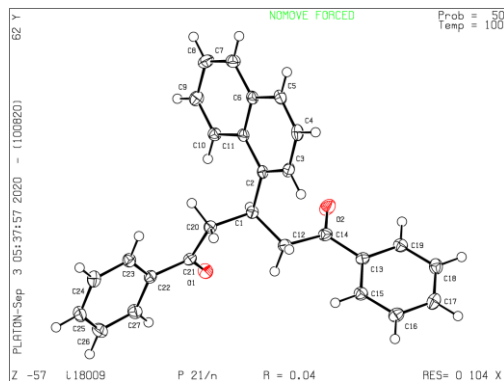

**Figure S3.** Single X-ray crystal structure of 1, 5-dicarbonyls **3t** (the thermal ellipsoid was drawn at the 50% probability level)

**Table S9. Crystal data and structure refinement for i18009.**

|                                   |                                                |                 |
|-----------------------------------|------------------------------------------------|-----------------|
| CCDC                              | 2031246                                        |                 |
| Identification code               | i18009                                         |                 |
| Empirical formula                 | C <sub>27</sub> H <sub>22</sub> O <sub>2</sub> |                 |
| Formula weight                    | 378.44                                         |                 |
| Temperature                       | 100.0(2) K                                     |                 |
| Wavelength                        | 0.71073 Å                                      |                 |
| Crystal system                    | Monoclinic                                     |                 |
| Space group                       | P 2 <sub>1</sub> /n                            |                 |
| Unit cell dimensions              | a = 13.3568(5) Å                               | α = 90°.        |
|                                   | b = 10.1409(3) Å                               | β = 96.328(2)°. |
|                                   | c = 14.6406(5) Å                               | γ = 90°.        |
| Z, Volume                         | 4, 1970.99(12) Å <sup>3</sup>                  |                 |
| Density (calculated)              | 1.275 Mg/m <sup>3</sup>                        |                 |
| Absorption coefficient            | 0.079 mm <sup>-1</sup>                         |                 |
| F(000)                            | 800                                            |                 |
| Crystal size                      | 0.150 x 0.125 x 0.125 mm <sup>3</sup>          |                 |
| Theta range for data collection   | 1.959 to 27.105°.                              |                 |
| Index ranges                      | -17 ≤ h ≤ 17, -12 ≤ k ≤ 12, -18 ≤ l ≤ 18       |                 |
| Reflections collected             | 83535                                          |                 |
| Independent reflections           | 4341 [R(int) = 0.0721]                         |                 |
| Completeness to theta = 25.242°   | 99.8 %                                         |                 |
| Absorption correction             | Numerical                                      |                 |
| Max. and min. transmission        | 0.9988 and 0.9689                              |                 |
| Refinement method                 | Full-matrix least-squares on F <sup>2</sup>    |                 |
| Data / restraints / parameters    | 4341 / 0 / 262                                 |                 |
| Goodness-of-fit on F <sup>2</sup> | 1.058                                          |                 |
| Final R indices [I > 2σ(I)]       | R1 = 0.0384, wR2 = 0.0865                      |                 |



R indices (all data)

R1 = 0.0530, wR2 = 0.0949

Extinction coefficient

n/a

Largest diff. peak and hole

0.267 and -0.219 e.Å<sup>-3</sup>

**Table S10. Atomic coordinates ( x 10<sup>4</sup>) and equivalent isotropic displacement parameters (Å<sup>2</sup>x 10<sup>3</sup>) for i18009. U(eq) is defined as one third of the trace of the orthogonalized U<sup>ij</sup> tensor.**

|       | x       | y        | z        | U(eq) |
|-------|---------|----------|----------|-------|
| O(1)  | 4534(1) | 7404(1)  | 3042(1)  | 23(1) |
| O(2)  | 5892(1) | 11210(1) | 2168(1)  | 32(1) |
| C(1)  | 6331(1) | 8902(1)  | 3152(1)  | 18(1) |
| C(2)  | 7285(1) | 9578(1)  | 3585(1)  | 17(1) |
| C(3)  | 8126(1) | 9700(1)  | 3130(1)  | 20(1) |
| C(4)  | 9017(1) | 10303(1) | 3541(1)  | 22(1) |
| C(5)  | 9067(1) | 10784(1) | 4415(1)  | 20(1) |
| C(6)  | 8233(1) | 10655(1) | 4927(1)  | 18(1) |
| C(7)  | 8287(1) | 11108(1) | 5846(1)  | 22(1) |
| C(8)  | 7485(1) | 10973(1) | 6344(1)  | 25(1) |
| C(9)  | 6594(1) | 10364(1) | 5947(1)  | 23(1) |
| C(10) | 6519(1) | 9915(1)  | 5059(1)  | 19(1) |
| C(11) | 7331(1) | 10047(1) | 4513(1)  | 16(1) |
| C(12) | 6224(1) | 8904(1)  | 2099(1)  | 20(1) |
| C(13) | 6228(1) | 10486(1) | 703(1)   | 18(1) |
| C(14) | 6102(1) | 10283(1) | 1698(1)  | 20(1) |
| C(15) | 6334(1) | 9435(1)  | 103(1)   | 20(1) |
| C(16) | 6440(1) | 9677(1)  | -815(1)  | 24(1) |
| C(17) | 6453(1) | 10961(1) | -1138(1) | 25(1) |
| C(18) | 6357(1) | 12012(1) | -545(1)  | 23(1) |
| C(19) | 6238(1) | 11774(1) | 368(1)   | 20(1) |
| C(20) | 6304(1) | 7482(1)  | 3526(1)  | 19(1) |
| C(21) | 5281(1) | 6824(1)  | 3392(1)  | 18(1) |
| C(22) | 5217(1) | 5412(1)  | 3683(1)  | 18(1) |
| C(23) | 6022(1) | 4771(1)  | 4189(1)  | 20(1) |
| C(24) | 5956(1) | 3439(1)  | 4395(1)  | 24(1) |
| C(25) | 5093(1) | 2743(1)  | 4098(1)  | 25(1) |
| C(26) | 4278(1) | 3375(1)  | 3614(1)  | 28(1) |
| C(27) | 4337(1) | 4707(1)  | 3411(1)  | 24(1) |

**Table S11. Bond lengths [ $\text{\AA}$ ] and angles [ $^\circ$ ] for i18009.**

---

|              |            |
|--------------|------------|
| O(1)-C(21)   | 1.2206(15) |
| O(2)-C(14)   | 1.2158(16) |
| C(1)-C(2)    | 1.5220(17) |
| C(1)-C(12)   | 1.5313(17) |
| C(1)-C(20)   | 1.5423(17) |
| C(1)-H(1)    | 1.0000     |
| C(2)-C(3)    | 1.3735(18) |
| C(2)-C(11)   | 1.4342(17) |
| C(3)-C(4)    | 1.4123(19) |
| C(3)-H(3)    | 0.9500     |
| C(4)-C(5)    | 1.3637(19) |
| C(4)-H(4)    | 0.9500     |
| C(5)-C(6)    | 1.4156(18) |
| C(5)-H(5)    | 0.9500     |
| C(6)-C(7)    | 1.4168(18) |
| C(6)-C(11)   | 1.4273(17) |
| C(7)-C(8)    | 1.366(2)   |
| C(7)-H(7)    | 0.9500     |
| C(8)-C(9)    | 1.4091(19) |
| C(8)-H(8)    | 0.9500     |
| C(9)-C(10)   | 1.3702(18) |
| C(9)-H(9)    | 0.9500     |
| C(10)-C(11)  | 1.4230(18) |
| C(10)-H(10)  | 0.9500     |
| C(12)-C(14)  | 1.5189(18) |
| C(12)-H(12A) | 0.9900     |
| C(12)-H(12B) | 0.9900     |
| C(13)-C(19)  | 1.3964(18) |
| C(13)-C(15)  | 1.3973(18) |
| C(13)-C(14)  | 1.4990(18) |
| C(15)-C(16)  | 1.3886(19) |
| C(15)-H(15)  | 0.9500     |
| C(16)-C(17)  | 1.386(2)   |
| C(16)-H(16)  | 0.9500     |
| C(17)-C(18)  | 1.389(2)   |
| C(17)-H(17)  | 0.9500     |

|                  |            |
|------------------|------------|
| C(18)-C(19)      | 1.3849(19) |
| C(18)-H(18)      | 0.9500     |
| C(19)-H(19)      | 0.9500     |
| C(20)-C(21)      | 1.5142(17) |
| C(20)-H(20A)     | 0.9900     |
| C(20)-H(20B)     | 0.9900     |
| C(21)-C(22)      | 1.4991(18) |
| C(22)-C(27)      | 1.3951(18) |
| C(22)-C(23)      | 1.3966(18) |
| C(23)-C(24)      | 1.3889(19) |
| C(23)-H(23)      | 0.9500     |
| C(24)-C(25)      | 1.381(2)   |
| C(24)-H(24)      | 0.9500     |
| C(25)-C(26)      | 1.388(2)   |
| C(25)-H(25)      | 0.9500     |
| C(26)-C(27)      | 1.3876(19) |
| C(26)-H(26)      | 0.9500     |
| C(27)-H(27)      | 0.9500     |
| C(2)-C(1)-C(12)  | 113.58(10) |
| C(2)-C(1)-C(20)  | 108.89(10) |
| C(12)-C(1)-C(20) | 110.80(10) |
| C(2)-C(1)-H(1)   | 107.8      |
| C(12)-C(1)-H(1)  | 107.8      |
| C(20)-C(1)-H(1)  | 107.8      |
| C(3)-C(2)-C(11)  | 118.51(12) |
| C(3)-C(2)-C(1)   | 122.02(11) |
| C(11)-C(2)-C(1)  | 119.40(11) |
| C(2)-C(3)-C(4)   | 121.89(12) |
| C(2)-C(3)-H(3)   | 119.1      |
| C(4)-C(3)-H(3)   | 119.1      |
| C(5)-C(4)-C(3)   | 120.44(12) |
| C(5)-C(4)-H(4)   | 119.8      |
| C(3)-C(4)-H(4)   | 119.8      |
| C(4)-C(5)-C(6)   | 120.22(12) |
| C(4)-C(5)-H(5)   | 119.9      |
| C(6)-C(5)-H(5)   | 119.9      |
| C(5)-C(6)-C(7)   | 120.84(12) |
| C(5)-C(6)-C(11)  | 119.45(12) |

|                     |            |
|---------------------|------------|
| C(7)-C(6)-C(11)     | 119.70(12) |
| C(8)-C(7)-C(6)      | 120.90(13) |
| C(8)-C(7)-H(7)      | 119.6      |
| C(6)-C(7)-H(7)      | 119.6      |
| C(7)-C(8)-C(9)      | 119.99(13) |
| C(7)-C(8)-H(8)      | 120.0      |
| C(9)-C(8)-H(8)      | 120.0      |
| C(10)-C(9)-C(8)     | 120.46(12) |
| C(10)-C(9)-H(9)     | 119.8      |
| C(8)-C(9)-H(9)      | 119.8      |
| C(9)-C(10)-C(11)    | 121.43(12) |
| C(9)-C(10)-H(10)    | 119.3      |
| C(11)-C(10)-H(10)   | 119.3      |
| C(10)-C(11)-C(6)    | 117.51(11) |
| C(10)-C(11)-C(2)    | 123.02(11) |
| C(6)-C(11)-C(2)     | 119.45(11) |
| C(14)-C(12)-C(1)    | 112.63(10) |
| C(14)-C(12)-H(12A)  | 109.1      |
| C(1)-C(12)-H(12A)   | 109.1      |
| C(14)-C(12)-H(12B)  | 109.1      |
| C(1)-C(12)-H(12B)   | 109.1      |
| H(12A)-C(12)-H(12B) | 107.8      |
| C(19)-C(13)-C(15)   | 119.15(12) |
| C(19)-C(13)-C(14)   | 118.41(11) |
| C(15)-C(13)-C(14)   | 122.44(12) |
| O(2)-C(14)-C(13)    | 120.14(12) |
| O(2)-C(14)-C(12)    | 120.95(12) |
| C(13)-C(14)-C(12)   | 118.91(11) |
| C(16)-C(15)-C(13)   | 120.10(12) |
| C(16)-C(15)-H(15)   | 119.9      |
| C(13)-C(15)-H(15)   | 119.9      |
| C(17)-C(16)-C(15)   | 120.18(13) |
| C(17)-C(16)-H(16)   | 119.9      |
| C(15)-C(16)-H(16)   | 119.9      |
| C(16)-C(17)-C(18)   | 120.15(13) |
| C(16)-C(17)-H(17)   | 119.9      |
| C(18)-C(17)-H(17)   | 119.9      |
| C(19)-C(18)-C(17)   | 119.81(13) |

|                     |            |
|---------------------|------------|
| C(19)-C(18)-H(18)   | 120.1      |
| C(17)-C(18)-H(18)   | 120.1      |
| C(18)-C(19)-C(13)   | 120.60(12) |
| C(18)-C(19)-H(19)   | 119.7      |
| C(13)-C(19)-H(19)   | 119.7      |
| C(21)-C(20)-C(1)    | 114.97(10) |
| C(21)-C(20)-H(20A)  | 108.5      |
| C(1)-C(20)-H(20A)   | 108.5      |
| C(21)-C(20)-H(20B)  | 108.5      |
| C(1)-C(20)-H(20B)   | 108.5      |
| H(20A)-C(20)-H(20B) | 107.5      |
| O(1)-C(21)-C(22)    | 120.69(11) |
| O(1)-C(21)-C(20)    | 121.69(11) |
| C(22)-C(21)-C(20)   | 117.60(11) |
| C(27)-C(22)-C(23)   | 119.21(12) |
| C(27)-C(22)-C(21)   | 118.74(11) |
| C(23)-C(22)-C(21)   | 122.01(11) |
| C(24)-C(23)-C(22)   | 120.27(12) |
| C(24)-C(23)-H(23)   | 119.9      |
| C(22)-C(23)-H(23)   | 119.9      |
| C(25)-C(24)-C(23)   | 119.94(13) |
| C(25)-C(24)-H(24)   | 120.0      |
| C(23)-C(24)-H(24)   | 120.0      |
| C(24)-C(25)-C(26)   | 120.40(13) |
| C(24)-C(25)-H(25)   | 119.8      |
| C(26)-C(25)-H(25)   | 119.8      |
| C(27)-C(26)-C(25)   | 119.87(13) |
| C(27)-C(26)-H(26)   | 120.1      |
| C(25)-C(26)-H(26)   | 120.1      |
| C(26)-C(27)-C(22)   | 120.26(13) |
| C(26)-C(27)-H(27)   | 119.9      |
| C(22)-C(27)-H(27)   | 119.9      |

---

Symmetry transformations used to generate equivalent atoms:

**Table S12. Anisotropic displacement parameters ( $\text{\AA}^2 \times 10^3$ ) for i18009. The anisotropic displacement factor exponent takes the form:  $-2\pi^2 [ h^2 a^{*2} U^{11} + \dots + 2 h k a^* b^* U^{12} ]$**

|       | $U^{11}$ | $U^{22}$ | $U^{33}$ | $U^{23}$ | $U^{13}$ | $U^{12}$ |
|-------|----------|----------|----------|----------|----------|----------|
| O(1)  | 20(1)    | 22(1)    | 27(1)    | 2(1)     | 0(1)     | 2(1)     |
| O(2)  | 55(1)    | 22(1)    | 20(1)    | -2(1)    | 4(1)     | 9(1)     |
| C(1)  | 20(1)    | 17(1)    | 17(1)    | 1(1)     | 2(1)     | 0(1)     |
| C(2)  | 21(1)    | 13(1)    | 17(1)    | 3(1)     | 1(1)     | 1(1)     |
| C(3)  | 24(1)    | 21(1)    | 16(1)    | 3(1)     | 3(1)     | 1(1)     |
| C(4)  | 19(1)    | 23(1)    | 24(1)    | 7(1)     | 7(1)     | 1(1)     |
| C(5)  | 18(1)    | 18(1)    | 25(1)    | 5(1)     | 0(1)     | -2(1)    |
| C(6)  | 20(1)    | 14(1)    | 20(1)    | 3(1)     | 0(1)     | 1(1)     |
| C(7)  | 23(1)    | 21(1)    | 22(1)    | -1(1)    | -2(1)    | -1(1)    |
| C(8)  | 30(1)    | 28(1)    | 18(1)    | -4(1)    | 1(1)     | 1(1)     |
| C(9)  | 23(1)    | 26(1)    | 21(1)    | -1(1)    | 6(1)     | 1(1)     |
| C(10) | 19(1)    | 18(1)    | 20(1)    | 0(1)     | 2(1)     | 0(1)     |
| C(11) | 18(1)    | 13(1)    | 18(1)    | 2(1)     | 1(1)     | 1(1)     |
| C(12) | 22(1)    | 18(1)    | 18(1)    | -1(1)    | 0(1)     | 0(1)     |
| C(13) | 14(1)    | 21(1)    | 18(1)    | 0(1)     | -2(1)    | 1(1)     |
| C(14) | 21(1)    | 20(1)    | 19(1)    | -1(1)    | -2(1)    | 1(1)     |
| C(15) | 19(1)    | 20(1)    | 21(1)    | 0(1)     | 0(1)     | 0(1)     |
| C(16) | 25(1)    | 25(1)    | 21(1)    | -3(1)    | 4(1)     | 2(1)     |
| C(17) | 24(1)    | 31(1)    | 20(1)    | 4(1)     | 5(1)     | 2(1)     |
| C(18) | 21(1)    | 23(1)    | 26(1)    | 6(1)     | 1(1)     | 1(1)     |
| C(19) | 18(1)    | 20(1)    | 22(1)    | 0(1)     | -1(1)    | 1(1)     |
| C(20) | 19(1)    | 18(1)    | 18(1)    | 1(1)     | 0(1)     | 0(1)     |
| C(21) | 19(1)    | 20(1)    | 15(1)    | -2(1)    | 3(1)     | 1(1)     |
| C(22) | 20(1)    | 19(1)    | 15(1)    | -1(1)    | 5(1)     | 0(1)     |
| C(23) | 19(1)    | 22(1)    | 20(1)    | 1(1)     | 3(1)     | -1(1)    |
| C(24) | 24(1)    | 24(1)    | 25(1)    | 5(1)     | 4(1)     | 2(1)     |
| C(25) | 31(1)    | 19(1)    | 27(1)    | 3(1)     | 5(1)     | -2(1)    |
| C(26) | 27(1)    | 26(1)    | 31(1)    | 1(1)     | -2(1)    | -8(1)    |
| C(27) | 21(1)    | 24(1)    | 25(1)    | 2(1)     | -1(1)    | -2(1)    |

## Crystal data and structure refinement for compound **4e**

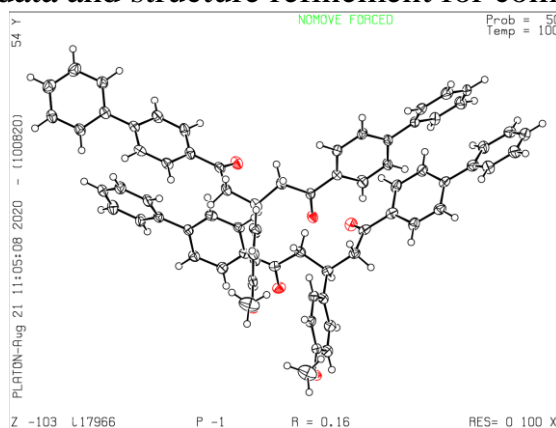

**Figure S4.** Single X-ray crystal structure of 1, 5-dicarbonyls **4e** (the thermal ellipsoid was drawn at the 50% probability level).

**Table S13. Crystal data and structure refinement for i17966.**

|                                   |                                                |                 |
|-----------------------------------|------------------------------------------------|-----------------|
| CCDC                              | 2031242                                        |                 |
| Identification code               | i17966                                         |                 |
| Empirical formula                 | C <sub>36</sub> H <sub>30</sub> O <sub>3</sub> |                 |
| Formula weight                    | 510.60                                         |                 |
| Temperature                       | 100.0(2) K                                     |                 |
| Wavelength                        | 0.71073 Å                                      |                 |
| Crystal system                    | Triclinic                                      |                 |
| Space group                       | P -1                                           |                 |
| Unit cell dimensions              | a = 10.2451(10) Å                              | α = 89.086(4)°. |
|                                   | b = 10.3941(9) Å                               | β = 89.020(4)°. |
|                                   | c = 26.429(2) Å                                | γ = 77.645(4)°. |
| Z, Volume                         | 4, 2748.6(4) Å <sup>3</sup>                    |                 |
| Density (calculated)              | 1.234 Mg/m <sup>3</sup>                        |                 |
| Absorption coefficient            | 0.077 mm <sup>-1</sup>                         |                 |
| F(000)                            | 1080                                           |                 |
| Crystal size                      | 0.167 x 0.110 x 0.063 mm <sup>3</sup>          |                 |
| Theta range for data collection   | 2.035 to 27.193°.                              |                 |
| Index ranges                      | -13 ≤ h ≤ 13, -13 ≤ k ≤ 13, -33 ≤ l ≤ 33       |                 |
| Reflections collected             | 132589                                         |                 |
| Independent reflections           | 12176 [R(int) = 0.1739]                        |                 |
| Completeness to theta = 25.242°   | 99.9 %                                         |                 |
| Absorption correction             | Numerical                                      |                 |
| Max. and min. transmission        | 0.9787 and 0.8859                              |                 |
| Refinement method                 | Full-matrix least-squares on F <sup>2</sup>    |                 |
| Data / restraints / parameters    | 12176 / 0 / 706                                |                 |
| Goodness-of-fit on F <sup>2</sup> | 1.091                                          |                 |

|                               |                                    |
|-------------------------------|------------------------------------|
| Final R indices [I>2sigma(I)] | R1 = 0.1599, wR2 = 0.4169          |
| R indices (all data)          | R1 = 0.2009, wR2 = 0.4372          |
| Extinction coefficient        | 0.0104(15)                         |
| Largest diff. peak and hole   | 0.739 and -0.558 e.Å <sup>-3</sup> |

**Table S14. Atomic coordinates ( x 10<sup>4</sup>) and equivalent isotropic displacement parameters (Å<sup>2</sup>x 10<sup>3</sup>) for i17966. U(eq) is defined as one third of the trace of the orthogonalized U<sup>ij</sup> tensor.**

|       | x        | y         | z       | U(eq) |
|-------|----------|-----------|---------|-------|
| O(1)  | 7207(6)  | -901(6)   | 8007(2) | 38(2) |
| O(2)  | 4654(5)  | 4821(6)   | 7034(2) | 27(1) |
| O(3)  | 5075(6)  | 7312(6)   | 8306(2) | 32(1) |
| O(4)  | 2064(6)  | -1085(6)  | 7186(2) | 36(1) |
| O(5)  | 319(6)   | 7064(6)   | 6559(2) | 32(1) |
| O(6)  | -420(5)  | 4682(6)   | 7870(2) | 30(1) |
| C(1)  | 5943(7)  | 4716(8)   | 7953(3) | 27(2) |
| C(2)  | 6296(7)  | 3211(8)   | 7950(3) | 21(2) |
| C(3)  | 7632(8)  | 2530(8)   | 7902(3) | 29(2) |
| C(4)  | 7974(8)  | 1159(8)   | 7932(3) | 29(2) |
| C(5)  | 6990(8)  | 461(8)    | 7993(3) | 26(2) |
| C(6)  | 5652(8)  | 1112(8)   | 8054(3) | 28(2) |
| C(7)  | 5345(7)  | 2466(8)   | 8023(3) | 23(2) |
| C(8)  | 8545(11) | -1610(10) | 7999(5) | 58(3) |
| C(9)  | 6453(8)  | 5361(8)   | 7482(3) | 26(2) |
| C(10) | 5630(7)  | 5320(7)   | 7018(3) | 20(1) |
| C(11) | 6023(7)  | 5904(7)   | 6531(3) | 21(2) |
| C(12) | 7214(8)  | 6330(8)   | 6465(3) | 26(2) |
| C(13) | 7528(8)  | 6869(8)   | 6007(3) | 25(2) |
| C(14) | 6634(8)  | 7059(7)   | 5606(3) | 23(2) |
| C(15) | 5438(8)  | 6655(8)   | 5674(3) | 28(2) |
| C(16) | 5136(8)  | 6078(9)   | 6132(3) | 31(2) |
| C(17) | 6979(8)  | 7638(7)   | 5117(3) | 24(2) |
| C(18) | 8312(8)  | 7418(8)   | 4940(3) | 27(2) |
| C(19) | 8616(9)  | 7916(9)   | 4474(3) | 32(2) |
| C(20) | 7607(9)  | 8639(9)   | 4169(3) | 34(2) |
| C(21) | 6294(9)  | 8870(9)   | 4341(3) | 34(2) |
| C(22) | 5965(8)  | 8383(8)   | 4812(3) | 29(2) |
| C(23) | 6474(8)  | 5196(8)   | 8437(3) | 25(2) |



|       |          |           |          |       |
|-------|----------|-----------|----------|-------|
| C(24) | 5892(8)  | 6621(8)   | 8568(3)  | 26(2) |
| C(25) | 6301(8)  | 7119(8)   | 9057(3)  | 27(2) |
| C(26) | 5975(9)  | 8439(9)   | 9154(3)  | 32(2) |
| C(27) | 6326(8)  | 8930(8)   | 9604(3)  | 29(2) |
| C(28) | 7017(8)  | 8082(8)   | 9982(3)  | 24(2) |
| C(29) | 7318(8)  | 6734(8)   | 9879(3)  | 27(2) |
| C(30) | 6985(8)  | 6257(8)   | 9426(3)  | 26(2) |
| C(31) | 7396(8)  | 8574(8)   | 10468(3) | 26(2) |
| C(32) | 7863(10) | 9725(8)   | 10481(3) | 34(2) |
| C(33) | 8249(10) | 10171(9)  | 10941(4) | 39(2) |
| C(34) | 8210(10) | 9460(9)   | 11388(4) | 38(2) |
| C(35) | 7779(9)  | 8289(9)   | 11373(3) | 32(2) |
| C(36) | 7376(8)  | 7842(8)   | 10911(3) | 28(2) |
| C(37) | 995(7)   | 4493(7)   | 6960(3)  | 23(2) |
| C(38) | 1317(7)  | 2997(8)   | 7033(3)  | 22(2) |
| C(39) | 2599(7)  | 2314(7)   | 7139(3)  | 23(2) |
| C(40) | 2898(8)  | 942(8)    | 7188(3)  | 24(2) |
| C(41) | 1907(8)  | 244(7)    | 7141(3)  | 23(2) |
| C(42) | 612(8)   | 916(8)    | 7021(3)  | 28(2) |
| C(43) | 328(8)   | 2283(8)   | 6971(3)  | 27(2) |
| C(44) | 3405(11) | -1812(10) | 7248(5)  | 53(3) |
| C(45) | 1604(8)  | 4877(7)   | 6456(3)  | 25(2) |
| C(46) | 1089(8)  | 6293(8)   | 6293(3)  | 26(2) |
| C(47) | 1535(8)  | 6742(7)   | 5792(3)  | 25(2) |
| C(48) | 1981(8)  | 5897(8)   | 5394(3)  | 29(2) |
| C(49) | 2279(8)  | 6361(8)   | 4926(3)  | 29(2) |
| C(50) | 2193(8)  | 7694(8)   | 4834(3)  | 26(2) |
| C(51) | 1778(9)  | 8556(8)   | 5235(3)  | 29(2) |
| C(52) | 1447(8)  | 8081(8)   | 5708(3)  | 28(2) |
| C(53) | 2497(8)  | 8216(8)   | 4327(3)  | 30(2) |
| C(54) | 3462(9)  | 7497(9)   | 4011(3)  | 32(2) |
| C(55) | 3750(10) | 7991(10)  | 3538(3)  | 40(2) |
| C(56) | 3090(10) | 9209(10)  | 3383(3)  | 39(2) |
| C(57) | 2110(10) | 9962(9)   | 3684(3)  | 37(2) |
| C(58) | 1831(9)  | 9475(8)   | 4160(3)  | 32(2) |
| C(59) | 1431(8)  | 5186(8)   | 7409(3)  | 26(2) |
| C(60) | 614(7)   | 5082(7)   | 7889(3)  | 23(2) |
| C(61) | 1077(7)  | 5463(7)   | 8381(3)  | 23(2) |

|       |         |         |          |       |
|-------|---------|---------|----------|-------|
| C(62) | 2173(8) | 6039(7) | 8426(3)  | 23(2) |
| C(63) | 2514(8) | 6462(8) | 8885(3)  | 27(2) |
| C(64) | 1761(7) | 6299(7) | 9321(3)  | 21(2) |
| C(65) | 667(7)  | 5722(8) | 9281(3)  | 25(2) |
| C(66) | 321(8)  | 5305(8) | 8812(3)  | 27(2) |
| C(67) | 2105(7) | 6776(8) | 9818(3)  | 24(2) |
| C(68) | 3446(8) | 6743(8) | 9940(3)  | 28(2) |
| C(69) | 3751(9) | 7232(9) | 10397(3) | 31(2) |
| C(70) | 2761(9) | 7755(8) | 10745(3) | 31(2) |
| C(71) | 1425(9) | 7768(9) | 10634(3) | 35(2) |
| C(72) | 1116(8) | 7279(8) | 10175(3) | 28(2) |

---

**Table S15. Bond lengths [Å] and angles [°] for i17966.**

---

|             |           |
|-------------|-----------|
| O(1)-C(5)   | 1.385(10) |
| O(1)-C(8)   | 1.410(12) |
| O(2)-C(10)  | 1.221(9)  |
| O(3)-C(24)  | 1.201(10) |
| O(4)-C(41)  | 1.359(9)  |
| O(4)-C(44)  | 1.430(11) |
| O(5)-C(46)  | 1.220(10) |
| O(6)-C(60)  | 1.220(9)  |
| C(1)-C(2)   | 1.528(11) |
| C(1)-C(23)  | 1.530(11) |
| C(1)-C(9)   | 1.540(10) |
| C(1)-H(1)   | 1.0000    |
| C(2)-C(7)   | 1.378(10) |
| C(2)-C(3)   | 1.405(10) |
| C(3)-C(4)   | 1.394(12) |
| C(3)-H(3)   | 0.9500    |
| C(4)-C(5)   | 1.370(11) |
| C(4)-H(4)   | 0.9500    |
| C(5)-C(6)   | 1.401(11) |
| C(6)-C(7)   | 1.376(11) |
| C(6)-H(6)   | 0.9500    |
| C(7)-H(7)   | 0.9500    |
| C(8)-H(8A)  | 0.9800    |
| C(8)-H(8B)  | 0.9800    |
| C(8)-H(8C)  | 0.9800    |
| C(9)-C(10)  | 1.506(10) |
| C(9)-H(9A)  | 0.9900    |
| C(9)-H(9AB) | 0.9900    |
| C(10)-C(11) | 1.501(10) |
| C(11)-C(16) | 1.387(11) |
| C(11)-C(12) | 1.392(10) |
| C(12)-C(13) | 1.385(11) |
| C(12)-H(12) | 0.9500    |
| C(13)-C(14) | 1.398(10) |
| C(13)-H(13) | 0.9500    |
| C(14)-C(15) | 1.385(11) |

|              |           |
|--------------|-----------|
| C(14)-C(17)  | 1.487(10) |
| C(15)-C(16)  | 1.403(11) |
| C(15)-H(15)  | 0.9500    |
| C(16)-H(16)  | 0.9500    |
| C(17)-C(18)  | 1.408(11) |
| C(17)-C(22)  | 1.411(11) |
| C(18)-C(19)  | 1.384(12) |
| C(18)-H(18)  | 0.9500    |
| C(19)-C(20)  | 1.400(13) |
| C(19)-H(19)  | 0.9500    |
| C(20)-C(21)  | 1.385(13) |
| C(20)-H(20)  | 0.9500    |
| C(21)-C(22)  | 1.400(12) |
| C(21)-H(21)  | 0.9500    |
| C(22)-H(22)  | 0.9500    |
| C(23)-C(24)  | 1.517(11) |
| C(23)-H(23A) | 0.9900    |
| C(23)-H(23B) | 0.9900    |
| C(24)-C(25)  | 1.499(11) |
| C(25)-C(26)  | 1.368(12) |
| C(25)-C(30)  | 1.404(11) |
| C(26)-C(27)  | 1.385(12) |
| C(26)-H(26)  | 0.9500    |
| C(27)-C(28)  | 1.417(11) |
| C(27)-H(27)  | 0.9500    |
| C(28)-C(29)  | 1.400(11) |
| C(28)-C(31)  | 1.478(11) |
| C(29)-C(30)  | 1.378(11) |
| C(29)-H(29)  | 0.9500    |
| C(30)-H(30)  | 0.9500    |
| C(31)-C(32)  | 1.381(12) |
| C(31)-C(36)  | 1.387(11) |
| C(32)-C(33)  | 1.400(12) |
| C(32)-H(32)  | 0.9500    |
| C(33)-C(34)  | 1.388(13) |
| C(33)-H(33)  | 0.9500    |
| C(34)-C(35)  | 1.382(13) |
| C(34)-H(34)  | 0.9500    |

|              |           |
|--------------|-----------|
| C(35)-C(36)  | 1.413(12) |
| C(35)-H(35)  | 0.9500    |
| C(36)-H(36)  | 0.9500    |
| C(37)-C(59)  | 1.519(11) |
| C(37)-C(38)  | 1.528(11) |
| C(37)-C(45)  | 1.545(11) |
| C(37)-H(37)  | 1.0000    |
| C(38)-C(39)  | 1.384(10) |
| C(38)-C(43)  | 1.391(10) |
| C(39)-C(40)  | 1.397(11) |
| C(39)-H(39)  | 0.9500    |
| C(40)-C(41)  | 1.377(10) |
| C(40)-H(40)  | 0.9500    |
| C(41)-C(42)  | 1.400(11) |
| C(42)-C(43)  | 1.393(12) |
| C(42)-H(42)  | 0.9500    |
| C(43)-H(43)  | 0.9500    |
| C(44)-H(44A) | 0.9800    |
| C(44)-H(44B) | 0.9800    |
| C(44)-H(44C) | 0.9800    |
| C(45)-C(46)  | 1.512(11) |
| C(45)-H(45A) | 0.9900    |
| C(45)-H(45B) | 0.9900    |
| C(46)-C(47)  | 1.494(11) |
| C(47)-C(48)  | 1.387(11) |
| C(47)-C(52)  | 1.389(11) |
| C(48)-C(49)  | 1.375(12) |
| C(48)-H(48)  | 0.9500    |
| C(49)-C(50)  | 1.387(11) |
| C(49)-H(49)  | 0.9500    |
| C(50)-C(51)  | 1.400(11) |
| C(50)-C(53)  | 1.489(11) |
| C(51)-C(52)  | 1.400(11) |
| C(51)-H(51)  | 0.9500    |
| C(52)-H(52)  | 0.9500    |
| C(53)-C(54)  | 1.382(12) |
| C(53)-C(58)  | 1.408(11) |
| C(54)-C(55)  | 1.396(12) |

|                  |           |
|------------------|-----------|
| C(54)-H(54)      | 0.9500    |
| C(55)-C(56)      | 1.361(14) |
| C(55)-H(55)      | 0.9500    |
| C(56)-C(57)      | 1.382(14) |
| C(56)-H(56)      | 0.9500    |
| C(57)-C(58)      | 1.396(12) |
| C(57)-H(57)      | 0.9500    |
| C(58)-H(58)      | 0.9500    |
| C(59)-C(60)      | 1.523(10) |
| C(59)-H(59A)     | 0.9900    |
| C(59)-H(59B)     | 0.9900    |
| C(60)-C(61)      | 1.480(11) |
| C(61)-C(62)      | 1.389(10) |
| C(61)-C(66)      | 1.395(11) |
| C(62)-C(63)      | 1.372(11) |
| C(62)-H(62)      | 0.9500    |
| C(63)-C(64)      | 1.404(10) |
| C(63)-H(63)      | 0.9500    |
| C(64)-C(65)      | 1.386(10) |
| C(64)-C(67)      | 1.485(10) |
| C(65)-C(66)      | 1.395(11) |
| C(65)-H(65)      | 0.9500    |
| C(66)-H(66)      | 0.9500    |
| C(67)-C(72)      | 1.395(11) |
| C(67)-C(68)      | 1.410(11) |
| C(68)-C(69)      | 1.384(11) |
| C(68)-H(68)      | 0.9500    |
| C(69)-C(70)      | 1.385(12) |
| C(69)-H(69)      | 0.9500    |
| C(70)-C(71)      | 1.401(13) |
| C(70)-H(70)      | 0.9500    |
| C(71)-C(72)      | 1.391(12) |
| C(71)-H(71)      | 0.9500    |
| C(72)-H(72)      | 0.9500    |
| C(5)-O(1)-C(8)   | 117.4(7)  |
| C(41)-O(4)-C(44) | 115.9(7)  |
| C(2)-C(1)-C(23)  | 109.0(6)  |
| C(2)-C(1)-C(9)   | 113.8(6)  |

|                   |          |
|-------------------|----------|
| C(23)-C(1)-C(9)   | 110.8(7) |
| C(2)-C(1)-H(1)    | 107.7    |
| C(23)-C(1)-H(1)   | 107.7    |
| C(9)-C(1)-H(1)    | 107.7    |
| C(7)-C(2)-C(3)    | 117.2(7) |
| C(7)-C(2)-C(1)    | 122.1(7) |
| C(3)-C(2)-C(1)    | 120.6(7) |
| C(4)-C(3)-C(2)    | 121.1(7) |
| C(4)-C(3)-H(3)    | 119.5    |
| C(2)-C(3)-H(3)    | 119.5    |
| C(5)-C(4)-C(3)    | 119.6(7) |
| C(5)-C(4)-H(4)    | 120.2    |
| C(3)-C(4)-H(4)    | 120.2    |
| C(4)-C(5)-O(1)    | 124.5(7) |
| C(4)-C(5)-C(6)    | 120.6(8) |
| O(1)-C(5)-C(6)    | 114.8(7) |
| C(7)-C(6)-C(5)    | 118.4(7) |
| C(7)-C(6)-H(6)    | 120.8    |
| C(5)-C(6)-H(6)    | 120.8    |
| C(6)-C(7)-C(2)    | 123.1(7) |
| C(6)-C(7)-H(7)    | 118.5    |
| C(2)-C(7)-H(7)    | 118.5    |
| O(1)-C(8)-H(8A)   | 109.5    |
| O(1)-C(8)-H(8B)   | 109.5    |
| H(8A)-C(8)-H(8B)  | 109.5    |
| O(1)-C(8)-H(8C)   | 109.5    |
| H(8A)-C(8)-H(8C)  | 109.5    |
| H(8B)-C(8)-H(8C)  | 109.5    |
| C(10)-C(9)-C(1)   | 113.5(6) |
| C(10)-C(9)-H(9A)  | 108.9    |
| C(1)-C(9)-H(9A)   | 108.9    |
| C(10)-C(9)-H(9AB) | 108.9    |
| C(1)-C(9)-H(9AB)  | 108.9    |
| H(9A)-C(9)-H(9AB) | 107.7    |
| O(2)-C(10)-C(11)  | 119.9(6) |
| O(2)-C(10)-C(9)   | 121.0(6) |
| C(11)-C(10)-C(9)  | 119.2(6) |
| C(16)-C(11)-C(12) | 118.2(7) |

|                    |          |
|--------------------|----------|
| C(16)-C(11)-C(10)  | 118.6(7) |
| C(12)-C(11)-C(10)  | 123.1(7) |
| C(13)-C(12)-C(11)  | 120.9(7) |
| C(13)-C(12)-H(12)  | 119.5    |
| C(11)-C(12)-H(12)  | 119.5    |
| C(12)-C(13)-C(14)  | 121.1(7) |
| C(12)-C(13)-H(13)  | 119.4    |
| C(14)-C(13)-H(13)  | 119.4    |
| C(15)-C(14)-C(13)  | 117.9(7) |
| C(15)-C(14)-C(17)  | 121.3(7) |
| C(13)-C(14)-C(17)  | 120.8(7) |
| C(14)-C(15)-C(16)  | 120.9(7) |
| C(14)-C(15)-H(15)  | 119.6    |
| C(16)-C(15)-H(15)  | 119.6    |
| C(11)-C(16)-C(15)  | 120.9(7) |
| C(11)-C(16)-H(16)  | 119.6    |
| C(15)-C(16)-H(16)  | 119.6    |
| C(18)-C(17)-C(22)  | 118.8(7) |
| C(18)-C(17)-C(14)  | 120.9(7) |
| C(22)-C(17)-C(14)  | 120.3(7) |
| C(19)-C(18)-C(17)  | 120.4(8) |
| C(19)-C(18)-H(18)  | 119.8    |
| C(17)-C(18)-H(18)  | 119.8    |
| C(18)-C(19)-C(20)  | 120.8(8) |
| C(18)-C(19)-H(19)  | 119.6    |
| C(20)-C(19)-H(19)  | 119.6    |
| C(21)-C(20)-C(19)  | 119.3(8) |
| C(21)-C(20)-H(20)  | 120.4    |
| C(19)-C(20)-H(20)  | 120.4    |
| C(20)-C(21)-C(22)  | 120.9(8) |
| C(20)-C(21)-H(21)  | 119.5    |
| C(22)-C(21)-H(21)  | 119.5    |
| C(21)-C(22)-C(17)  | 119.8(8) |
| C(21)-C(22)-H(22)  | 120.1    |
| C(17)-C(22)-H(22)  | 120.1    |
| C(24)-C(23)-C(1)   | 115.3(6) |
| C(24)-C(23)-H(23A) | 108.5    |
| C(1)-C(23)-H(23A)  | 108.5    |



|                     |          |
|---------------------|----------|
| C(24)-C(23)-H(23B)  | 108.5    |
| C(1)-C(23)-H(23B)   | 108.5    |
| H(23A)-C(23)-H(23B) | 107.5    |
| O(3)-C(24)-C(25)    | 120.6(8) |
| O(3)-C(24)-C(23)    | 121.7(7) |
| C(25)-C(24)-C(23)   | 117.6(7) |
| C(26)-C(25)-C(30)   | 118.9(7) |
| C(26)-C(25)-C(24)   | 119.6(7) |
| C(30)-C(25)-C(24)   | 121.5(7) |
| C(25)-C(26)-C(27)   | 121.1(8) |
| C(25)-C(26)-H(26)   | 119.5    |
| C(27)-C(26)-H(26)   | 119.5    |
| C(26)-C(27)-C(28)   | 121.2(8) |
| C(26)-C(27)-H(27)   | 119.4    |
| C(28)-C(27)-H(27)   | 119.4    |
| C(29)-C(28)-C(27)   | 116.7(7) |
| C(29)-C(28)-C(31)   | 120.7(7) |
| C(27)-C(28)-C(31)   | 122.5(7) |
| C(30)-C(29)-C(28)   | 121.6(7) |
| C(30)-C(29)-H(29)   | 119.2    |
| C(28)-C(29)-H(29)   | 119.2    |
| C(29)-C(30)-C(25)   | 120.5(7) |
| C(29)-C(30)-H(30)   | 119.7    |
| C(25)-C(30)-H(30)   | 119.7    |
| C(32)-C(31)-C(36)   | 119.1(8) |
| C(32)-C(31)-C(28)   | 120.2(7) |
| C(36)-C(31)-C(28)   | 120.6(7) |
| C(31)-C(32)-C(33)   | 120.0(8) |
| C(31)-C(32)-H(32)   | 120.0    |
| C(33)-C(32)-H(32)   | 120.0    |
| C(34)-C(33)-C(32)   | 121.3(9) |
| C(34)-C(33)-H(33)   | 119.3    |
| C(32)-C(33)-H(33)   | 119.3    |
| C(35)-C(34)-C(33)   | 118.7(9) |
| C(35)-C(34)-H(34)   | 120.7    |
| C(33)-C(34)-H(34)   | 120.7    |
| C(34)-C(35)-C(36)   | 120.1(8) |
| C(34)-C(35)-H(35)   | 119.9    |

|                     |          |
|---------------------|----------|
| C(36)-C(35)-H(35)   | 119.9    |
| C(31)-C(36)-C(35)   | 120.7(8) |
| C(31)-C(36)-H(36)   | 119.7    |
| C(35)-C(36)-H(36)   | 119.7    |
| C(59)-C(37)-C(38)   | 111.9(6) |
| C(59)-C(37)-C(45)   | 112.1(6) |
| C(38)-C(37)-C(45)   | 110.4(6) |
| C(59)-C(37)-H(37)   | 107.4    |
| C(38)-C(37)-H(37)   | 107.4    |
| C(45)-C(37)-H(37)   | 107.4    |
| C(39)-C(38)-C(43)   | 118.3(7) |
| C(39)-C(38)-C(37)   | 121.4(7) |
| C(43)-C(38)-C(37)   | 120.3(7) |
| C(38)-C(39)-C(40)   | 121.2(7) |
| C(38)-C(39)-H(39)   | 119.4    |
| C(40)-C(39)-H(39)   | 119.4    |
| C(41)-C(40)-C(39)   | 120.2(7) |
| C(41)-C(40)-H(40)   | 119.9    |
| C(39)-C(40)-H(40)   | 119.9    |
| O(4)-C(41)-C(40)    | 125.9(7) |
| O(4)-C(41)-C(42)    | 114.7(7) |
| C(40)-C(41)-C(42)   | 119.3(7) |
| C(43)-C(42)-C(41)   | 119.8(8) |
| C(43)-C(42)-H(42)   | 120.1    |
| C(41)-C(42)-H(42)   | 120.1    |
| C(38)-C(43)-C(42)   | 121.0(7) |
| C(38)-C(43)-H(43)   | 119.5    |
| C(42)-C(43)-H(43)   | 119.5    |
| O(4)-C(44)-H(44A)   | 109.5    |
| O(4)-C(44)-H(44B)   | 109.5    |
| H(44A)-C(44)-H(44B) | 109.5    |
| O(4)-C(44)-H(44C)   | 109.5    |
| H(44A)-C(44)-H(44C) | 109.5    |
| H(44B)-C(44)-H(44C) | 109.5    |
| C(46)-C(45)-C(37)   | 114.3(6) |
| C(46)-C(45)-H(45A)  | 108.7    |
| C(37)-C(45)-H(45A)  | 108.7    |
| C(46)-C(45)-H(45B)  | 108.7    |

|                     |          |
|---------------------|----------|
| C(37)-C(45)-H(45B)  | 108.7    |
| H(45A)-C(45)-H(45B) | 107.6    |
| O(5)-C(46)-C(47)    | 119.9(7) |
| O(5)-C(46)-C(45)    | 121.5(7) |
| C(47)-C(46)-C(45)   | 118.6(7) |
| C(48)-C(47)-C(52)   | 117.9(8) |
| C(48)-C(47)-C(46)   | 123.4(7) |
| C(52)-C(47)-C(46)   | 118.7(7) |
| C(49)-C(48)-C(47)   | 121.6(8) |
| C(49)-C(48)-H(48)   | 119.2    |
| C(47)-C(48)-H(48)   | 119.2    |
| C(48)-C(49)-C(50)   | 121.5(8) |
| C(48)-C(49)-H(49)   | 119.3    |
| C(50)-C(49)-H(49)   | 119.3    |
| C(49)-C(50)-C(51)   | 117.5(8) |
| C(49)-C(50)-C(53)   | 122.2(7) |
| C(51)-C(50)-C(53)   | 120.3(7) |
| C(52)-C(51)-C(50)   | 120.8(7) |
| C(52)-C(51)-H(51)   | 119.6    |
| C(50)-C(51)-H(51)   | 119.6    |
| C(47)-C(52)-C(51)   | 120.8(7) |
| C(47)-C(52)-H(52)   | 119.6    |
| C(51)-C(52)-H(52)   | 119.6    |
| C(54)-C(53)-C(58)   | 117.8(8) |
| C(54)-C(53)-C(50)   | 121.2(7) |
| C(58)-C(53)-C(50)   | 120.9(8) |
| C(53)-C(54)-C(55)   | 121.1(8) |
| C(53)-C(54)-H(54)   | 119.4    |
| C(55)-C(54)-H(54)   | 119.4    |
| C(56)-C(55)-C(54)   | 120.0(9) |
| C(56)-C(55)-H(55)   | 120.0    |
| C(54)-C(55)-H(55)   | 120.0    |
| C(55)-C(56)-C(57)   | 121.0(9) |
| C(55)-C(56)-H(56)   | 119.5    |
| C(57)-C(56)-H(56)   | 119.5    |
| C(56)-C(57)-C(58)   | 119.0(9) |
| C(56)-C(57)-H(57)   | 120.5    |
| C(58)-C(57)-H(57)   | 120.5    |

|                     |          |
|---------------------|----------|
| C(57)-C(58)-C(53)   | 121.0(8) |
| C(57)-C(58)-H(58)   | 119.5    |
| C(53)-C(58)-H(58)   | 119.5    |
| C(37)-C(59)-C(60)   | 113.3(6) |
| C(37)-C(59)-H(59A)  | 108.9    |
| C(60)-C(59)-H(59A)  | 108.9    |
| C(37)-C(59)-H(59B)  | 108.9    |
| C(60)-C(59)-H(59B)  | 108.9    |
| H(59A)-C(59)-H(59B) | 107.7    |
| O(6)-C(60)-C(61)    | 119.7(7) |
| O(6)-C(60)-C(59)    | 120.3(7) |
| C(61)-C(60)-C(59)   | 119.9(6) |
| C(62)-C(61)-C(66)   | 119.0(7) |
| C(62)-C(61)-C(60)   | 123.1(7) |
| C(66)-C(61)-C(60)   | 117.8(7) |
| C(63)-C(62)-C(61)   | 121.3(7) |
| C(63)-C(62)-H(62)   | 119.4    |
| C(61)-C(62)-H(62)   | 119.4    |
| C(62)-C(63)-C(64)   | 120.0(7) |
| C(62)-C(63)-H(63)   | 120.0    |
| C(64)-C(63)-H(63)   | 120.0    |
| C(65)-C(64)-C(63)   | 119.3(7) |
| C(65)-C(64)-C(67)   | 120.2(7) |
| C(63)-C(64)-C(67)   | 120.5(7) |
| C(64)-C(65)-C(66)   | 120.3(7) |
| C(64)-C(65)-H(65)   | 119.8    |
| C(66)-C(65)-H(65)   | 119.8    |
| C(61)-C(66)-C(65)   | 120.1(7) |
| C(61)-C(66)-H(66)   | 119.9    |
| C(65)-C(66)-H(66)   | 119.9    |
| C(72)-C(67)-C(68)   | 118.1(7) |
| C(72)-C(67)-C(64)   | 121.2(7) |
| C(68)-C(67)-C(64)   | 120.7(7) |
| C(69)-C(68)-C(67)   | 120.1(8) |
| C(69)-C(68)-H(68)   | 119.9    |
| C(67)-C(68)-H(68)   | 119.9    |
| C(68)-C(69)-C(70)   | 121.4(8) |
| C(68)-C(69)-H(69)   | 119.3    |

|                   |          |
|-------------------|----------|
| C(70)-C(69)-H(69) | 119.3    |
| C(69)-C(70)-C(71) | 119.2(8) |
| C(69)-C(70)-H(70) | 120.4    |
| C(71)-C(70)-H(70) | 120.4    |
| C(72)-C(71)-C(70) | 119.5(8) |
| C(72)-C(71)-H(71) | 120.2    |
| C(70)-C(71)-H(71) | 120.2    |
| C(71)-C(72)-C(67) | 121.6(8) |
| C(71)-C(72)-H(72) | 119.2    |
| C(67)-C(72)-H(72) | 119.2    |

---

Symmetry transformations used to generate equivalent atoms:

**Table S16. Anisotropic displacement parameters ( $\text{\AA}^2 \times 10^3$ ) for i17966. The anisotropic displacement factor exponent takes the form:  $-2\pi^2 [ h^2 a^{*2} U^{11} + \dots + 2 h k a^* b^* U^{12} ]$**

|       | $U^{11}$ | $U^{22}$ | $U^{33}$ | $U^{23}$ | $U^{13}$ | $U^{12}$ |
|-------|----------|----------|----------|----------|----------|----------|
| O(1)  | 40(4)    | 32(3)    | 42(4)    | 2(3)     | 3(3)     | -6(3)    |
| O(2)  | 22(3)    | 35(3)    | 24(3)    | 6(2)     | -3(2)    | -8(2)    |
| O(3)  | 30(3)    | 36(3)    | 30(3)    | 8(2)     | -2(2)    | -6(3)    |
| O(4)  | 39(3)    | 22(3)    | 45(4)    | 11(3)    | -6(3)    | -4(3)    |
| O(5)  | 30(3)    | 30(3)    | 33(3)    | -1(2)    | -3(2)    | -1(2)    |
| O(6)  | 20(3)    | 37(3)    | 35(3)    | -6(3)    | 6(2)     | -13(2)   |
| C(1)  | 17(4)    | 32(4)    | 28(4)    | 8(3)     | 2(3)     | 1(3)     |
| C(2)  | 14(3)    | 33(4)    | 17(3)    | 2(3)     | 0(3)     | -7(3)    |
| C(3)  | 21(4)    | 34(4)    | 32(4)    | 6(3)     | 1(3)     | -9(3)    |
| C(4)  | 24(4)    | 33(4)    | 26(4)    | 1(3)     | 5(3)     | -1(3)    |
| C(5)  | 33(4)    | 31(4)    | 16(3)    | 3(3)     | 2(3)     | -8(3)    |
| C(6)  | 28(4)    | 37(5)    | 21(4)    | 4(3)     | -1(3)    | -12(3)   |
| C(7)  | 17(3)    | 33(4)    | 21(4)    | 4(3)     | -1(3)    | -6(3)    |
| C(8)  | 48(6)    | 35(5)    | 86(9)    | 3(5)     | 19(6)    | -3(5)    |
| C(9)  | 25(4)    | 34(4)    | 21(4)    | 3(3)     | 0(3)     | -10(3)   |
| C(10) | 16(3)    | 24(4)    | 20(3)    | 2(3)     | -3(3)    | -2(3)    |
| C(11) | 21(4)    | 21(4)    | 21(4)    | 2(3)     | 1(3)     | -4(3)    |
| C(12) | 24(4)    | 28(4)    | 24(4)    | 3(3)     | -7(3)    | -7(3)    |
| C(13) | 21(4)    | 34(4)    | 22(4)    | -3(3)    | -2(3)    | -10(3)   |
| C(14) | 24(4)    | 25(4)    | 19(3)    | 3(3)     | -3(3)    | -5(3)    |
| C(15) | 27(4)    | 39(5)    | 21(4)    | 9(3)     | -8(3)    | -14(3)   |
| C(16) | 22(4)    | 44(5)    | 30(4)    | 9(4)     | -7(3)    | -11(4)   |
| C(17) | 33(4)    | 19(4)    | 19(3)    | 0(3)     | -3(3)    | -5(3)    |
| C(18) | 26(4)    | 29(4)    | 26(4)    | -3(3)    | -5(3)    | -7(3)    |
| C(19) | 32(4)    | 34(4)    | 31(4)    | -9(3)    | 6(3)     | -9(4)    |
| C(20) | 50(5)    | 42(5)    | 16(4)    | -2(3)    | 2(3)     | -26(4)   |
| C(21) | 35(5)    | 37(5)    | 31(4)    | 7(4)     | -7(4)    | -10(4)   |
| C(22) | 30(4)    | 31(4)    | 24(4)    | -1(3)    | -2(3)    | -3(3)    |
| C(23) | 24(4)    | 29(4)    | 21(4)    | 4(3)     | 5(3)     | -3(3)    |
| C(24) | 25(4)    | 31(4)    | 23(4)    | 6(3)     | 1(3)     | -10(3)   |
| C(25) | 26(4)    | 33(4)    | 21(4)    | 2(3)     | 3(3)     | -6(3)    |
| C(26) | 37(5)    | 33(4)    | 23(4)    | 7(3)     | -3(3)    | -2(4)    |
| C(27) | 36(4)    | 24(4)    | 26(4)    | 1(3)     | 6(3)     | -1(3)    |

|       |       |       |       |       |        |        |
|-------|-------|-------|-------|-------|--------|--------|
| C(28) | 23(4) | 27(4) | 22(4) | 5(3)  | 1(3)   | -5(3)  |
| C(29) | 26(4) | 25(4) | 30(4) | 6(3)  | 3(3)   | -6(3)  |
| C(30) | 28(4) | 19(4) | 26(4) | 2(3)  | 5(3)   | 1(3)   |
| C(31) | 24(4) | 27(4) | 25(4) | 2(3)  | 3(3)   | -1(3)  |
| C(32) | 52(5) | 24(4) | 26(4) | 1(3)  | -2(4)  | -7(4)  |
| C(33) | 52(6) | 28(4) | 37(5) | -5(4) | -9(4)  | -5(4)  |
| C(34) | 43(5) | 36(5) | 36(5) | -9(4) | 2(4)   | -7(4)  |
| C(35) | 33(4) | 40(5) | 23(4) | 2(3)  | 5(3)   | -8(4)  |
| C(36) | 33(4) | 24(4) | 24(4) | 1(3)  | 5(3)   | -1(3)  |
| C(37) | 16(3) | 26(4) | 27(4) | -1(3) | -2(3)  | -6(3)  |
| C(38) | 19(3) | 28(4) | 21(3) | -2(3) | 7(3)   | -5(3)  |
| C(39) | 22(4) | 24(4) | 24(4) | 2(3)  | -6(3)  | -5(3)  |
| C(40) | 23(4) | 26(4) | 24(4) | -1(3) | -5(3)  | -5(3)  |
| C(41) | 25(4) | 23(4) | 21(4) | 1(3)  | -2(3)  | -6(3)  |
| C(42) | 26(4) | 31(4) | 28(4) | -2(3) | 3(3)   | -6(3)  |
| C(43) | 20(4) | 33(4) | 27(4) | -3(3) | 4(3)   | -6(3)  |
| C(44) | 47(6) | 32(5) | 74(8) | 9(5)  | 5(5)   | 6(4)   |
| C(45) | 24(4) | 22(4) | 28(4) | 0(3)  | -5(3)  | -5(3)  |
| C(46) | 24(4) | 24(4) | 32(4) | -5(3) | -5(3)  | -7(3)  |
| C(47) | 20(4) | 21(4) | 33(4) | 0(3)  | -8(3)  | 0(3)   |
| C(48) | 31(4) | 25(4) | 27(4) | -5(3) | -3(3)  | 1(3)   |
| C(49) | 32(4) | 23(4) | 32(4) | -4(3) | -1(3)  | -5(3)  |
| C(50) | 25(4) | 25(4) | 27(4) | -5(3) | -6(3)  | -6(3)  |
| C(51) | 38(5) | 22(4) | 27(4) | 3(3)  | -11(3) | -3(3)  |
| C(52) | 32(4) | 25(4) | 26(4) | -6(3) | -6(3)  | 0(3)   |
| C(53) | 33(4) | 25(4) | 31(4) | -1(3) | -5(3)  | -6(3)  |
| C(54) | 33(4) | 30(4) | 30(4) | 1(3)  | 2(3)   | -1(3)  |
| C(55) | 52(6) | 40(5) | 31(5) | -6(4) | 12(4)  | -20(4) |
| C(56) | 49(6) | 47(5) | 27(4) | 0(4)  | -5(4)  | -23(5) |
| C(57) | 50(6) | 28(4) | 34(5) | 3(4)  | -9(4)  | -15(4) |
| C(58) | 37(5) | 31(4) | 26(4) | 3(3)  | -6(3)  | -6(4)  |
| C(59) | 26(4) | 29(4) | 26(4) | 0(3)  | 4(3)   | -10(3) |
| C(60) | 20(4) | 20(4) | 28(4) | -1(3) | 0(3)   | -4(3)  |
| C(61) | 21(4) | 19(3) | 27(4) | 2(3)  | 3(3)   | -4(3)  |
| C(62) | 24(4) | 21(4) | 24(4) | 0(3)  | 6(3)   | -5(3)  |
| C(63) | 24(4) | 26(4) | 31(4) | 1(3)  | 5(3)   | -7(3)  |
| C(64) | 19(3) | 21(4) | 21(3) | 4(3)  | -2(3)  | -1(3)  |
| C(65) | 18(4) | 32(4) | 26(4) | 4(3)  | 1(3)   | -7(3)  |

|       |       |       |       |       |       |        |
|-------|-------|-------|-------|-------|-------|--------|
| C(66) | 21(4) | 34(4) | 28(4) | 4(3)  | -6(3) | -8(3)  |
| C(67) | 22(4) | 28(4) | 21(4) | 2(3)  | 2(3)  | -7(3)  |
| C(68) | 28(4) | 37(4) | 20(4) | 6(3)  | 0(3)  | -10(3) |
| C(69) | 29(4) | 42(5) | 26(4) | 2(3)  | -2(3) | -13(4) |
| C(70) | 43(5) | 30(4) | 23(4) | 8(3)  | -5(3) | -10(4) |
| C(71) | 36(5) | 43(5) | 25(4) | -2(4) | 6(3)  | -6(4)  |
| C(72) | 26(4) | 38(5) | 22(4) | -2(3) | 1(3)  | -9(3)  |

### Crystal data and structure refinement for compound **4r**

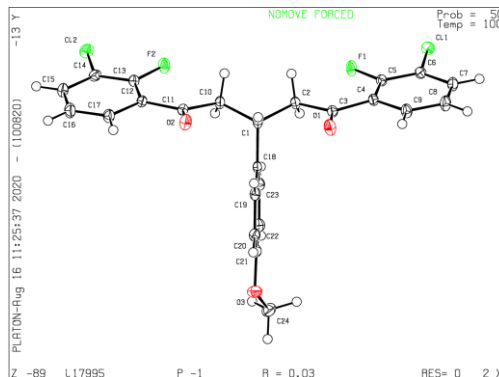

**Figure S5.** Single X-ray crystal structure of 1, 5-dicarbonyls **4r** (the thermal ellipsoid was drawn at the 50% probability level)

**Table S17. Crystal data and structure refinement for i17995**

|                                 |                                                                               |                   |
|---------------------------------|-------------------------------------------------------------------------------|-------------------|
| CCDC                            | 2031245                                                                       |                   |
| Identification code             | i17995                                                                        |                   |
| Empirical formula               | C <sub>24</sub> H <sub>18</sub> Cl <sub>2</sub> F <sub>2</sub> O <sub>3</sub> |                   |
| Formula weight                  | 463.28                                                                        |                   |
| Temperature                     | 100.0(2) K                                                                    |                   |
| Wavelength                      | 0.71073 Å                                                                     |                   |
| Crystal system                  | Triclinic                                                                     |                   |
| Space group                     | P -1                                                                          |                   |
| Unit cell dimensions            | a = 8.9911(2) Å                                                               | α = 88.9720(10)°. |
|                                 | b = 10.8950(3) Å                                                              | β = 73.5650(10)°. |
|                                 | c = 11.8009(3) Å                                                              | γ = 66.1240(10)°. |
| Z, Volume                       | 2, 1007.71(4) Å <sup>3</sup>                                                  |                   |
| Density (calculated)            | 1.527 Mg/m <sup>3</sup>                                                       |                   |
| Absorption coefficient          | 0.366 mm <sup>-1</sup>                                                        |                   |
| F(000)                          | 476                                                                           |                   |
| Crystal size                    | 0.288 x 0.227 x 0.182 mm <sup>3</sup>                                         |                   |
| Theta range for data collection | 1.810 to 30.508°.                                                             |                   |
| Index ranges                    | -12 ≤ h ≤ 12, -15 ≤ k ≤ 15, -16 ≤ l ≤ 16                                      |                   |



|                                   |                                             |
|-----------------------------------|---------------------------------------------|
| Reflections collected             | 52936                                       |
| Independent reflections           | 6134 [R(int) = 0.0380]                      |
| Completeness to theta = 25.242°   | 99.7 %                                      |
| Absorption correction             | Numerical                                   |
| Max. and min. transmission        | 1 and 0.9675                                |
| Refinement method                 | Full-matrix least-squares on F <sup>2</sup> |
| Data / restraints / parameters    | 6134 / 0 / 281                              |
| Goodness-of-fit on F <sup>2</sup> | 1.022                                       |
| Final R indices [I > 2sigma(I)]   | R1 = 0.0330, wR2 = 0.0811                   |
| R indices (all data)              | R1 = 0.0405, wR2 = 0.0860                   |
| Extinction coefficient            | n/a                                         |
| Largest diff. peak and hole       | 0.442 and -0.372 e.Å <sup>-3</sup>          |

**Table S18. Atomic coordinates (  $\times 10^4$ ) and equivalent isotropic displacement parameters ( $\text{\AA}^2 \times 10^3$ ) for i17995. U(eq) is defined as one third of the trace of the orthogonalized  $U^{ij}$  tensor.**

|       | x        | y        | z       | U(eq) |
|-------|----------|----------|---------|-------|
| Cl(1) | 12288(1) | -1735(1) | 739(1)  | 19(1) |
| Cl(2) | 6259(1)  | 9717(1)  | 978(1)  | 23(1) |
| F(1)  | 9606(1)  | 900(1)   | 1640(1) | 20(1) |
| F(2)  | 6384(1)  | 7197(1)  | 1880(1) | 21(1) |
| O(1)  | 5078(1)  | 1829(1)  | 4383(1) | 22(1) |
| O(2)  | 2673(1)  | 6687(1)  | 4619(1) | 21(1) |
| O(3)  | -460(1)  | 3998(1)  | 1613(1) | 21(1) |
| C(1)  | 4790(1)  | 4156(1)  | 3337(1) | 14(1) |
| C(2)  | 6453(1)  | 2867(1)  | 2914(1) | 15(1) |
| C(3)  | 6318(1)  | 1678(1)  | 3544(1) | 15(1) |
| C(4)  | 7724(1)  | 278(1)   | 3149(1) | 14(1) |
| C(5)  | 9239(1)  | -61(1)   | 2228(1) | 15(1) |
| C(6)  | 10427(1) | -1393(1) | 1884(1) | 15(1) |
| C(7)  | 10132(2) | -2428(1) | 2463(1) | 19(1) |
| C(8)  | 8634(2)  | -2115(1) | 3387(1) | 21(1) |
| C(9)  | 7457(2)  | -787(1)  | 3722(1) | 18(1) |
| C(10) | 5133(1)  | 5408(1)  | 3000(1) | 16(1) |
| C(11) | 3735(1)  | 6705(1)  | 3718(1) | 15(1) |
| C(12) | 3640(1)  | 8049(1)  | 3321(1) | 14(1) |
| C(13) | 4901(1)  | 8248(1)  | 2441(1) | 15(1) |
| C(14) | 4684(2)  | 9524(1)  | 2102(1) | 17(1) |

|       |         |          |         |       |
|-------|---------|----------|---------|-------|
| C(15) | 3197(2) | 10639(1) | 2659(1) | 21(1) |
| C(16) | 1924(2) | 10472(1) | 3546(1) | 22(1) |
| C(17) | 2147(2) | 9193(1)  | 3867(1) | 18(1) |
| C(18) | 3418(1) | 4100(1)  | 2855(1) | 14(1) |
| C(19) | 1845(1) | 4223(1)  | 3614(1) | 15(1) |
| C(20) | 584(1)  | 4176(1)  | 3181(1) | 16(1) |
| C(21) | 871(1)  | 4000(1)  | 1955(1) | 16(1) |
| C(22) | 2440(2) | 3852(1)  | 1173(1) | 16(1) |
| C(23) | 3678(1) | 3914(1)  | 1634(1) | 16(1) |
| C(24) | -85(2)  | 3408(1)  | 438(1)  | 23(1) |

---

**Table S19. Bond lengths [Å] and angles [°] for i17995.**

---

|              |            |
|--------------|------------|
| Cl(1)-C(6)   | 1.7319(12) |
| Cl(2)-C(14)  | 1.7253(12) |
| F(1)-C(5)    | 1.3461(13) |
| F(2)-C(13)   | 1.3489(13) |
| O(1)-C(3)    | 1.2174(14) |
| O(2)-C(11)   | 1.2182(14) |
| O(3)-C(21)   | 1.3684(14) |
| O(3)-C(24)   | 1.4280(15) |
| C(1)-C(18)   | 1.5199(16) |
| C(1)-C(2)    | 1.5366(15) |
| C(1)-C(10)   | 1.5377(15) |
| C(1)-H(1)    | 1.0000     |
| C(2)-C(3)    | 1.5122(15) |
| C(2)-H(2A)   | 0.9900     |
| C(2)-H(2AB)  | 0.9900     |
| C(3)-C(4)    | 1.5081(15) |
| C(4)-C(5)    | 1.3933(15) |
| C(4)-C(9)    | 1.4024(15) |
| C(5)-C(6)    | 1.3904(15) |
| C(6)-C(7)    | 1.3856(16) |
| C(7)-C(8)    | 1.3890(17) |
| C(7)-H(7)    | 0.9500     |
| C(8)-C(9)    | 1.3843(17) |
| C(8)-H(8)    | 0.9500     |
| C(9)-H(9)    | 0.9500     |
| C(10)-C(11)  | 1.5163(15) |
| C(10)-H(10A) | 0.9900     |
| C(10)-H(10B) | 0.9900     |
| C(11)-C(12)  | 1.5057(15) |
| C(12)-C(13)  | 1.3913(16) |
| C(12)-C(17)  | 1.3982(16) |
| C(13)-C(14)  | 1.3912(16) |
| C(14)-C(15)  | 1.3829(17) |
| C(15)-C(16)  | 1.3863(18) |
| C(15)-H(15)  | 0.9500     |
| C(16)-C(17)  | 1.3870(17) |

|                   |            |
|-------------------|------------|
| C(16)-H(16)       | 0.9500     |
| C(17)-H(17)       | 0.9500     |
| C(18)-C(23)       | 1.3972(16) |
| C(18)-C(19)       | 1.3977(15) |
| C(19)-C(20)       | 1.3883(16) |
| C(19)-H(19)       | 0.9500     |
| C(20)-C(21)       | 1.3974(16) |
| C(20)-H(20)       | 0.9500     |
| C(21)-C(22)       | 1.3977(16) |
| C(22)-C(23)       | 1.3954(16) |
| C(22)-H(22)       | 0.9500     |
| C(23)-H(23)       | 0.9500     |
| C(24)-H(24A)      | 0.9800     |
| C(24)-H(24B)      | 0.9800     |
| C(24)-H(24C)      | 0.9800     |
| C(21)-O(3)-C(24)  | 117.57(10) |
| C(18)-C(1)-C(2)   | 111.66(9)  |
| C(18)-C(1)-C(10)  | 111.35(9)  |
| C(2)-C(1)-C(10)   | 110.30(9)  |
| C(18)-C(1)-H(1)   | 107.8      |
| C(2)-C(1)-H(1)    | 107.8      |
| C(10)-C(1)-H(1)   | 107.8      |
| C(3)-C(2)-C(1)    | 112.16(9)  |
| C(3)-C(2)-H(2A)   | 109.2      |
| C(1)-C(2)-H(2A)   | 109.2      |
| C(3)-C(2)-H(2AB)  | 109.2      |
| C(1)-C(2)-H(2AB)  | 109.2      |
| H(2A)-C(2)-H(2AB) | 107.9      |
| O(1)-C(3)-C(4)    | 118.57(10) |
| O(1)-C(3)-C(2)    | 120.87(10) |
| C(4)-C(3)-C(2)    | 120.56(10) |
| C(5)-C(4)-C(9)    | 116.95(10) |
| C(5)-C(4)-C(3)    | 125.74(10) |
| C(9)-C(4)-C(3)    | 117.26(10) |
| F(1)-C(5)-C(6)    | 117.52(10) |
| F(1)-C(5)-C(4)    | 120.77(10) |
| C(6)-C(5)-C(4)    | 121.70(10) |
| C(7)-C(6)-C(5)    | 120.29(10) |

|                     |            |
|---------------------|------------|
| C(7)-C(6)-Cl(1)     | 120.67(9)  |
| C(5)-C(6)-Cl(1)     | 119.03(9)  |
| C(6)-C(7)-C(8)      | 119.08(11) |
| C(6)-C(7)-H(7)      | 120.5      |
| C(8)-C(7)-H(7)      | 120.5      |
| C(9)-C(8)-C(7)      | 120.27(11) |
| C(9)-C(8)-H(8)      | 119.9      |
| C(7)-C(8)-H(8)      | 119.9      |
| C(8)-C(9)-C(4)      | 121.71(11) |
| C(8)-C(9)-H(9)      | 119.1      |
| C(4)-C(9)-H(9)      | 119.1      |
| C(11)-C(10)-C(1)    | 113.00(9)  |
| C(11)-C(10)-H(10A)  | 109.0      |
| C(1)-C(10)-H(10A)   | 109.0      |
| C(11)-C(10)-H(10B)  | 109.0      |
| C(1)-C(10)-H(10B)   | 109.0      |
| H(10A)-C(10)-H(10B) | 107.8      |
| O(2)-C(11)-C(12)    | 118.76(10) |
| O(2)-C(11)-C(10)    | 121.19(10) |
| C(12)-C(11)-C(10)   | 120.05(10) |
| C(13)-C(12)-C(17)   | 117.12(10) |
| C(13)-C(12)-C(11)   | 125.49(10) |
| C(17)-C(12)-C(11)   | 117.38(10) |
| F(2)-C(13)-C(14)    | 117.57(10) |
| F(2)-C(13)-C(12)    | 120.70(10) |
| C(14)-C(13)-C(12)   | 121.73(11) |
| C(15)-C(14)-C(13)   | 119.97(11) |
| C(15)-C(14)-Cl(2)   | 119.88(9)  |
| C(13)-C(14)-Cl(2)   | 120.15(9)  |
| C(14)-C(15)-C(16)   | 119.52(11) |
| C(14)-C(15)-H(15)   | 120.2      |
| C(16)-C(15)-H(15)   | 120.2      |
| C(15)-C(16)-C(17)   | 119.99(11) |
| C(15)-C(16)-H(16)   | 120.0      |
| C(17)-C(16)-H(16)   | 120.0      |
| C(16)-C(17)-C(12)   | 121.66(11) |
| C(16)-C(17)-H(17)   | 119.2      |
| C(12)-C(17)-H(17)   | 119.2      |

|                     |            |
|---------------------|------------|
| C(23)-C(18)-C(19)   | 117.17(10) |
| C(23)-C(18)-C(1)    | 121.40(10) |
| C(19)-C(18)-C(1)    | 121.43(10) |
| C(20)-C(19)-C(18)   | 121.76(11) |
| C(20)-C(19)-H(19)   | 119.1      |
| C(18)-C(19)-H(19)   | 119.1      |
| C(19)-C(20)-C(21)   | 119.97(10) |
| C(19)-C(20)-H(20)   | 120.0      |
| C(21)-C(20)-H(20)   | 120.0      |
| O(3)-C(21)-C(20)    | 115.75(10) |
| O(3)-C(21)-C(22)    | 124.57(11) |
| C(20)-C(21)-C(22)   | 119.68(11) |
| C(23)-C(22)-C(21)   | 119.04(11) |
| C(23)-C(22)-H(22)   | 120.5      |
| C(21)-C(22)-H(22)   | 120.5      |
| C(22)-C(23)-C(18)   | 122.37(10) |
| C(22)-C(23)-H(23)   | 118.8      |
| C(18)-C(23)-H(23)   | 118.8      |
| O(3)-C(24)-H(24A)   | 109.5      |
| O(3)-C(24)-H(24B)   | 109.5      |
| H(24A)-C(24)-H(24B) | 109.5      |
| O(3)-C(24)-H(24C)   | 109.5      |
| H(24A)-C(24)-H(24C) | 109.5      |
| H(24B)-C(24)-H(24C) | 109.5      |

---

Symmetry transformations used to generate equivalent atoms:

**Table S20. Anisotropic displacement parameters ( $\text{\AA}^2 \times 10^3$ ) for i17995. The anisotropic displacement factor exponent takes the form:  $-2\pi^2 [ h^2 a^{*2} U^{11} + \dots + 2 h k a^* b^* U^{12} ]$**

|       | $U^{11}$ | $U^{22}$ | $U^{33}$ | $U^{23}$ | $U^{13}$ | $U^{12}$ |
|-------|----------|----------|----------|----------|----------|----------|
| Cl(1) | 15(1)    | 19(1)    | 19(1)    | -1(1)    | -1(1)    | -6(1)    |
| Cl(2) | 25(1)    | 24(1)    | 24(1)    | 8(1)     | -7(1)    | -15(1)   |
| F(1)  | 18(1)    | 14(1)    | 25(1)    | 7(1)     | 0(1)     | -6(1)    |
| F(2)  | 17(1)    | 15(1)    | 25(1)    | 1(1)     | 1(1)     | -5(1)    |
| O(1)  | 17(1)    | 17(1)    | 24(1)    | 6(1)     | 1(1)     | -5(1)    |
| O(2)  | 22(1)    | 16(1)    | 19(1)    | 1(1)     | 1(1)     | -8(1)    |
| O(3)  | 17(1)    | 25(1)    | 23(1)    | -2(1)    | -5(1)    | -9(1)    |
| C(1)  | 14(1)    | 10(1)    | 16(1)    | 2(1)     | -3(1)    | -4(1)    |
| C(2)  | 13(1)    | 11(1)    | 17(1)    | 3(1)     | -2(1)    | -4(1)    |
| C(3)  | 14(1)    | 13(1)    | 17(1)    | 3(1)     | -5(1)    | -5(1)    |
| C(4)  | 14(1)    | 12(1)    | 16(1)    | 3(1)     | -5(1)    | -5(1)    |
| C(5)  | 15(1)    | 13(1)    | 17(1)    | 5(1)     | -5(1)    | -6(1)    |
| C(6)  | 14(1)    | 15(1)    | 15(1)    | 0(1)     | -3(1)    | -5(1)    |
| C(7)  | 19(1)    | 12(1)    | 23(1)    | 2(1)     | -6(1)    | -5(1)    |
| C(8)  | 23(1)    | 14(1)    | 24(1)    | 6(1)     | -4(1)    | -7(1)    |
| C(9)  | 17(1)    | 14(1)    | 20(1)    | 5(1)     | -3(1)    | -6(1)    |
| C(10) | 14(1)    | 11(1)    | 18(1)    | 1(1)     | -2(1)    | -4(1)    |
| C(11) | 15(1)    | 12(1)    | 16(1)    | 1(1)     | -5(1)    | -6(1)    |
| C(12) | 16(1)    | 12(1)    | 16(1)    | 1(1)     | -5(1)    | -6(1)    |
| C(13) | 15(1)    | 12(1)    | 17(1)    | 0(1)     | -5(1)    | -4(1)    |
| C(14) | 19(1)    | 18(1)    | 19(1)    | 4(1)     | -7(1)    | -11(1)   |
| C(15) | 24(1)    | 13(1)    | 26(1)    | 5(1)     | -10(1)   | -8(1)    |
| C(16) | 21(1)    | 13(1)    | 28(1)    | 0(1)     | -5(1)    | -4(1)    |
| C(17) | 17(1)    | 14(1)    | 20(1)    | 0(1)     | -3(1)    | -5(1)    |
| C(18) | 13(1)    | 9(1)     | 16(1)    | 2(1)     | -2(1)    | -3(1)    |
| C(19) | 15(1)    | 12(1)    | 14(1)    | 0(1)     | -1(1)    | -5(1)    |
| C(20) | 14(1)    | 14(1)    | 18(1)    | -1(1)    | 0(1)     | -5(1)    |
| C(21) | 14(1)    | 11(1)    | 20(1)    | 1(1)     | -4(1)    | -4(1)    |
| C(22) | 17(1)    | 15(1)    | 15(1)    | 2(1)     | -3(1)    | -6(1)    |
| C(23) | 13(1)    | 14(1)    | 16(1)    | 2(1)     | -1(1)    | -4(1)    |
| C(24) | 28(1)    | 22(1)    | 24(1)    | 2(1)     | -11(1)   | -14(1)   |

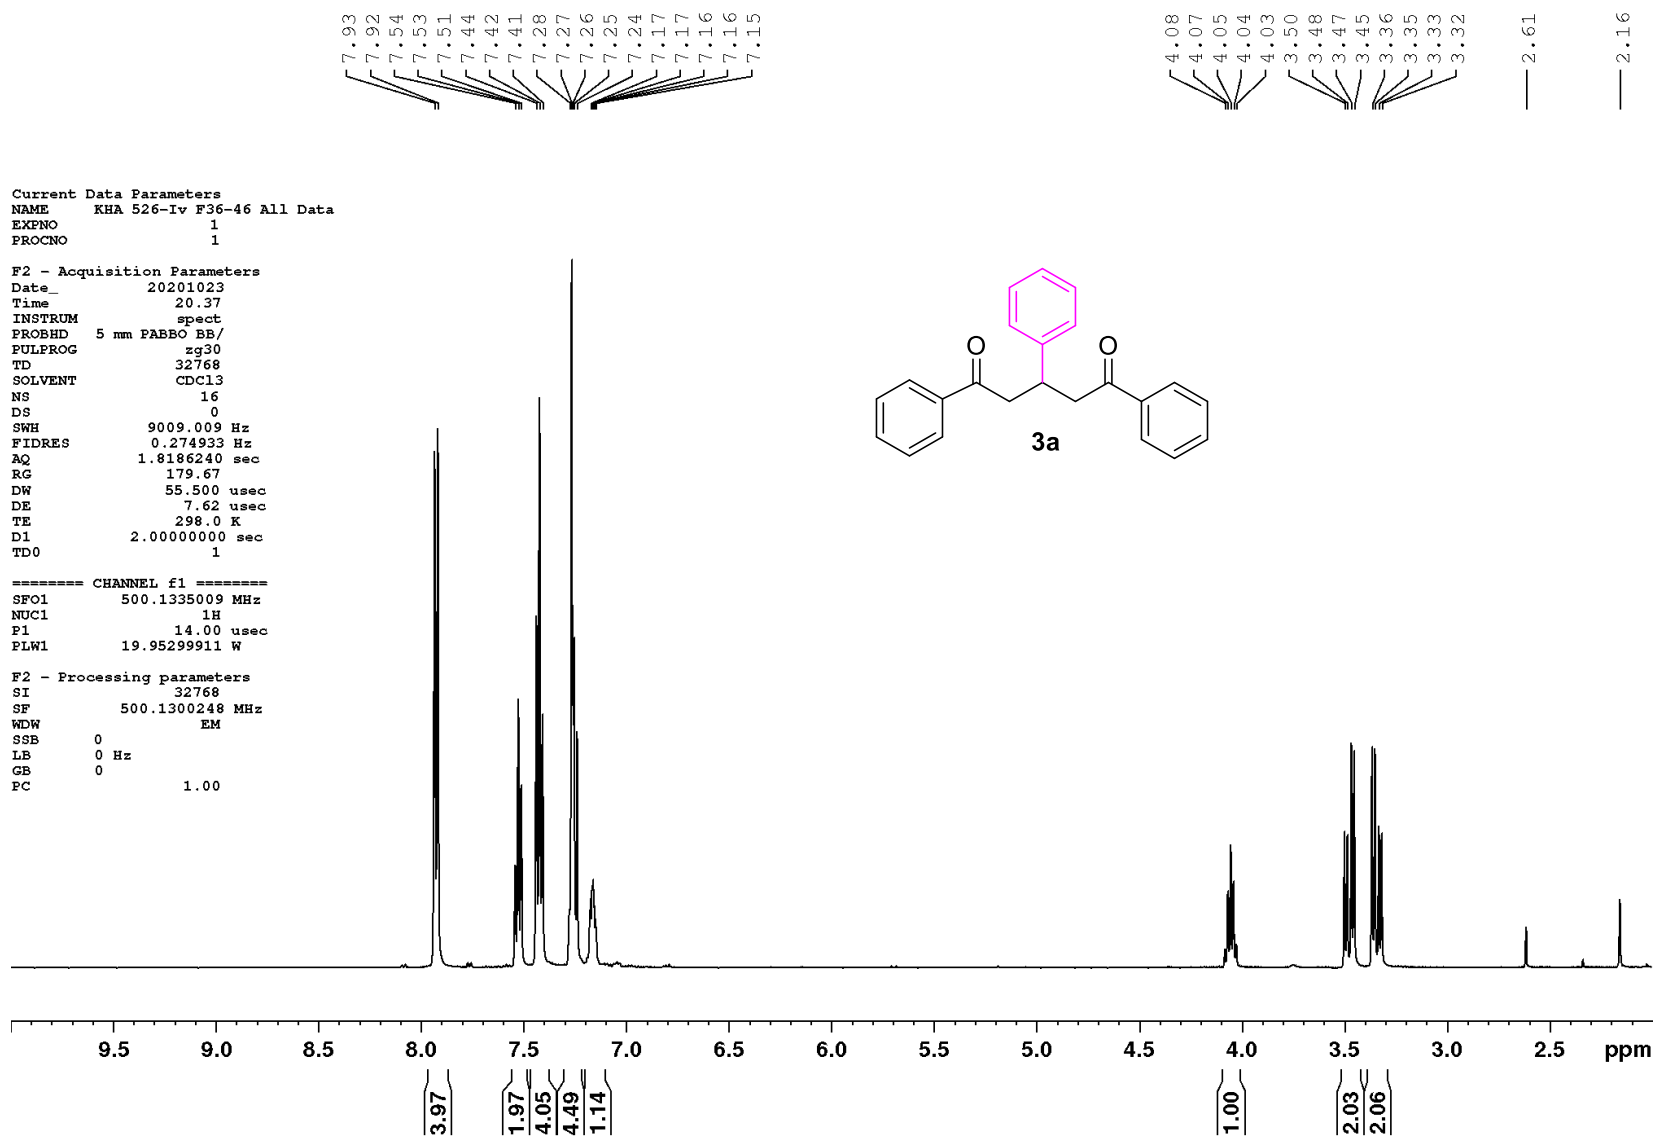

Figure S6.  $^1\text{H}$  NMR spectrum of compound **3a** (500 MHz,  $\text{CDCl}_3$ , 25  $^\circ\text{C}$ )



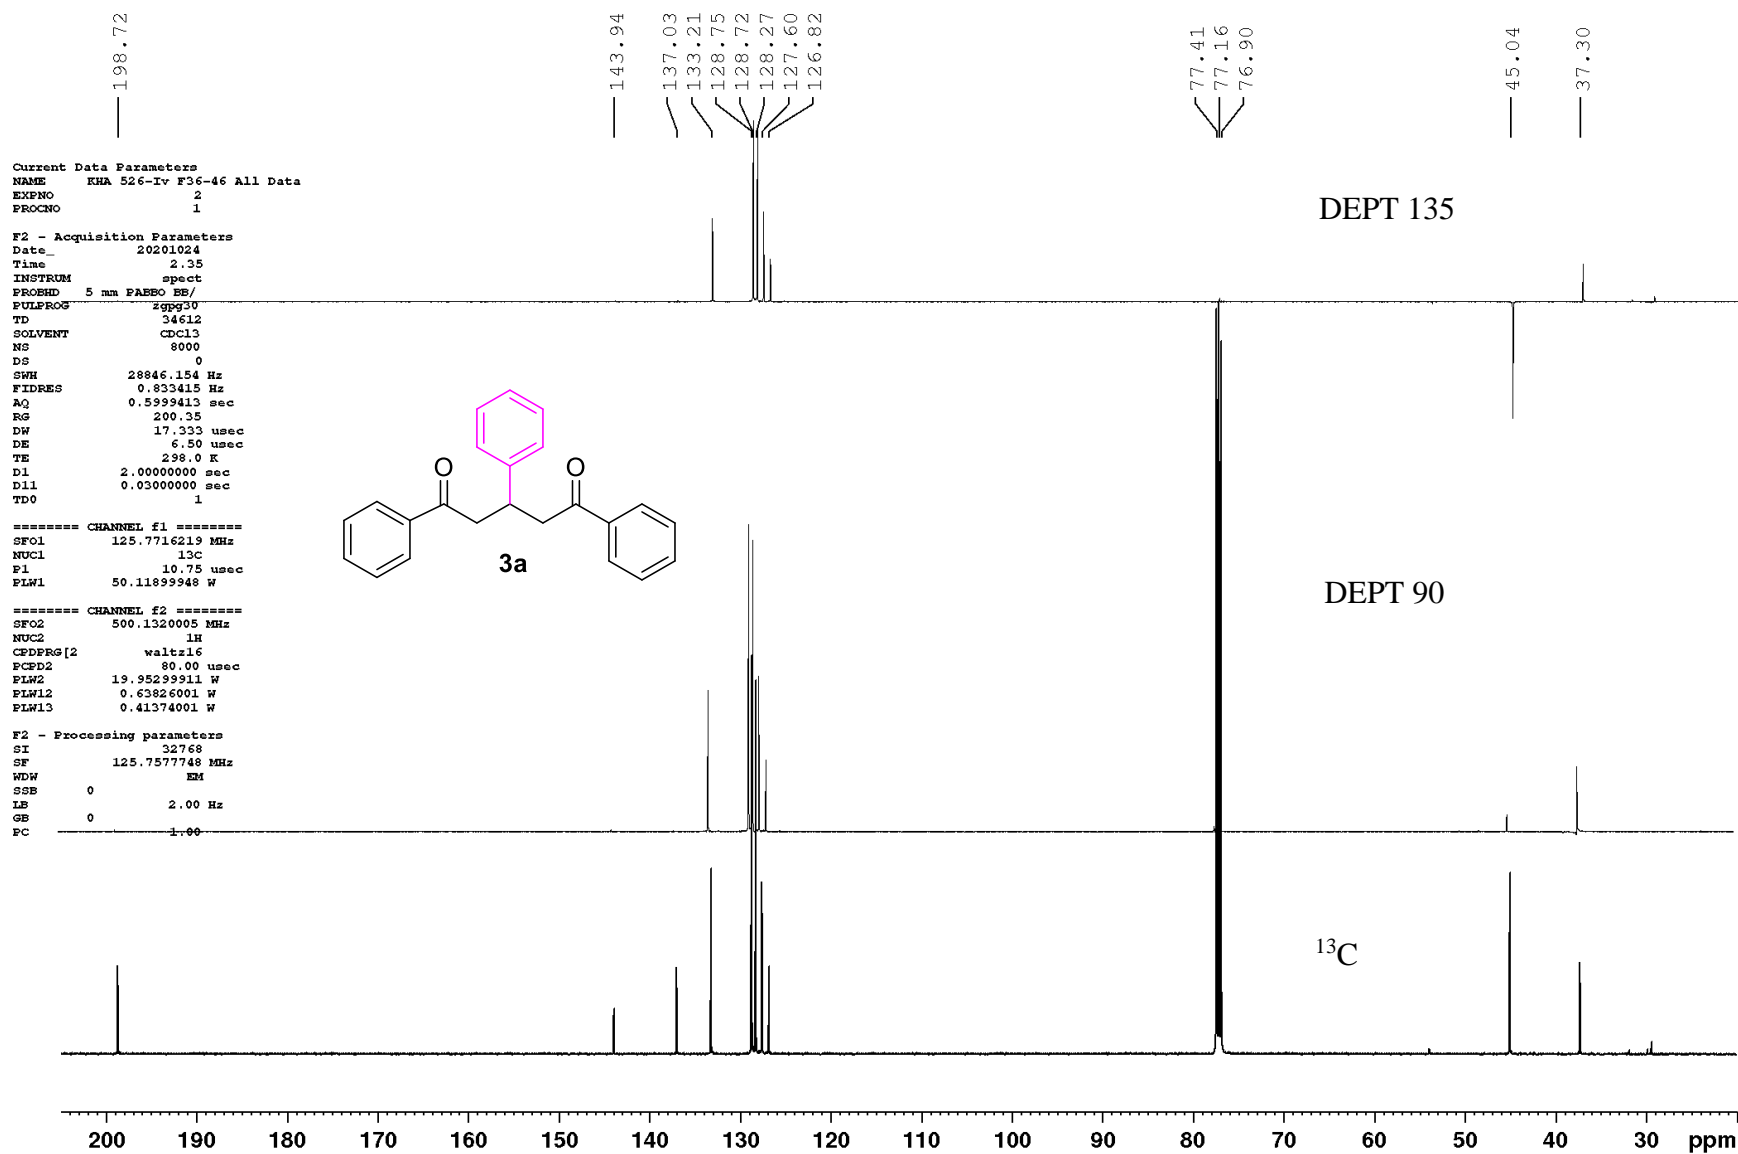

Figure S7. <sup>13</sup>C NMR spectrum of compound **3a** (125 MHz, CDCl<sub>3</sub>, 25 °C)

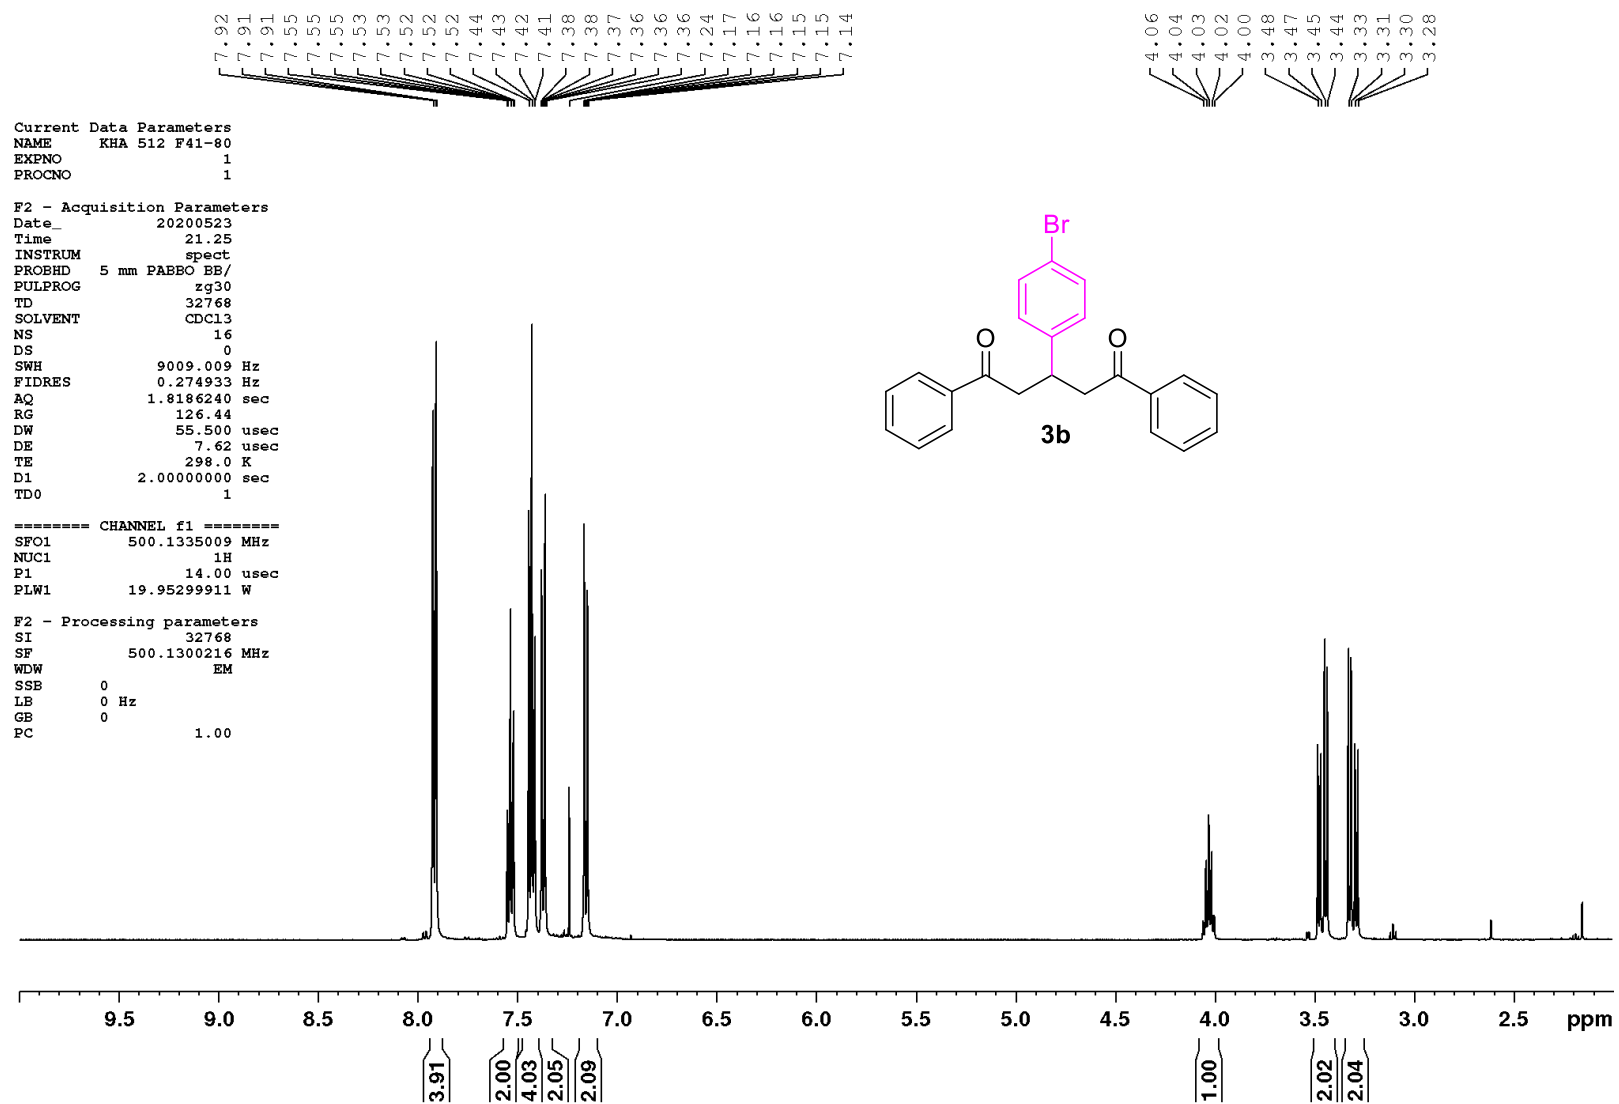

Figure S8. <sup>1</sup>H NMR spectrum of compound **3b** (500 MHz, CDCl<sub>3</sub>, 25 °C)

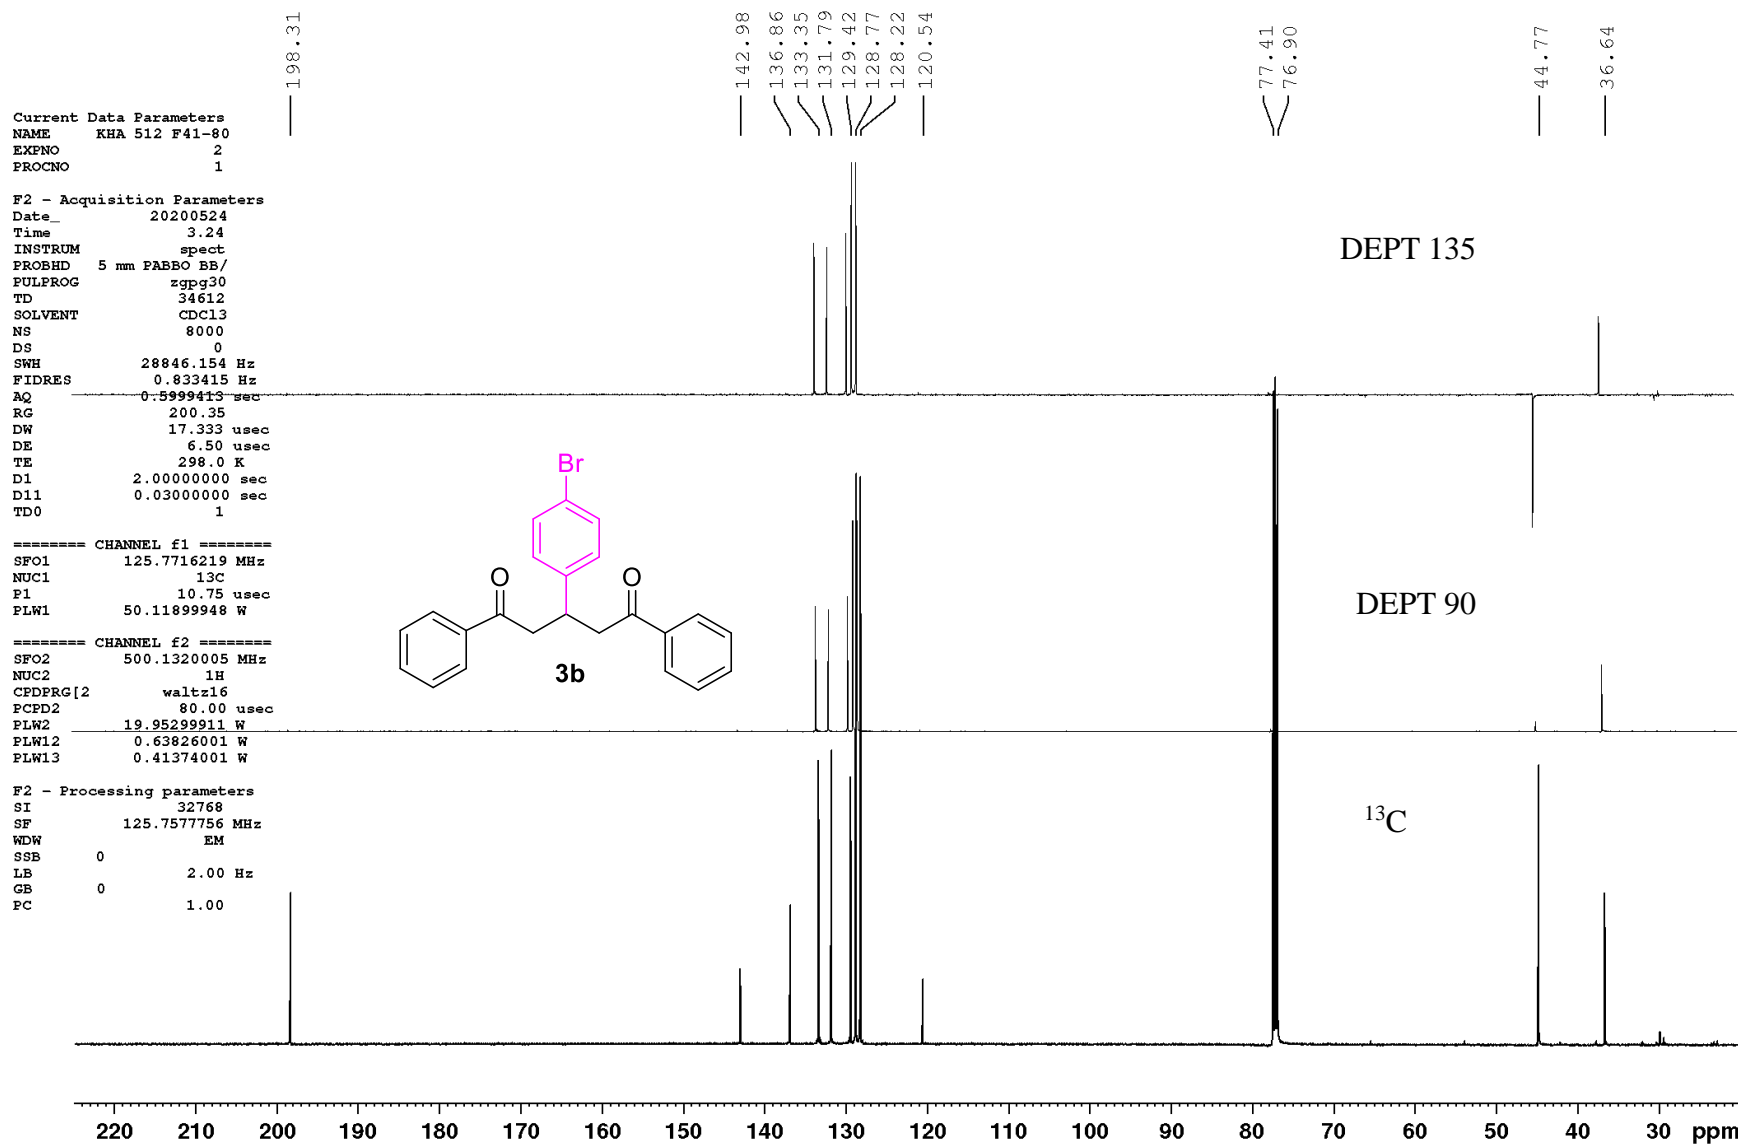

Figure S9. <sup>13</sup>C NMR spectrum of compound **3b** (125 MHz, CDCl<sub>3</sub>, 25 °C)

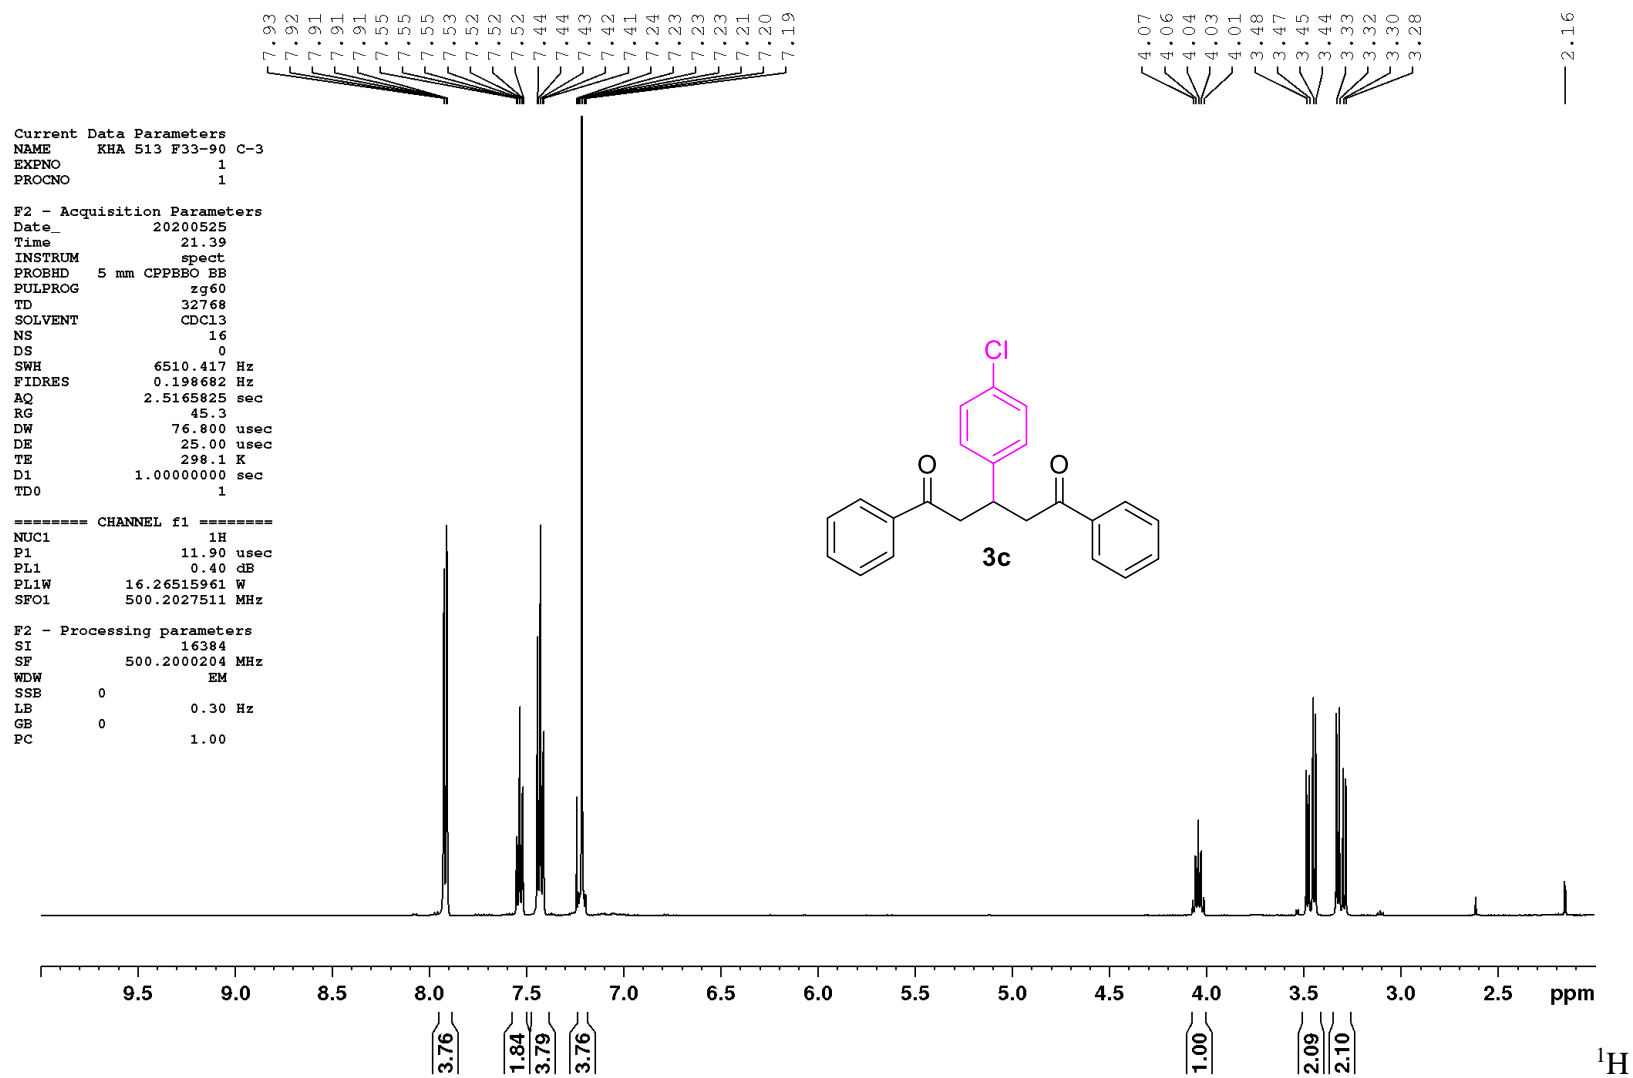

Figure S10.  $^1\text{H}$  NMR spectrum of compound **3c** (500 MHz,  $\text{CDCl}_3$ , 25  $^\circ\text{C}$ )

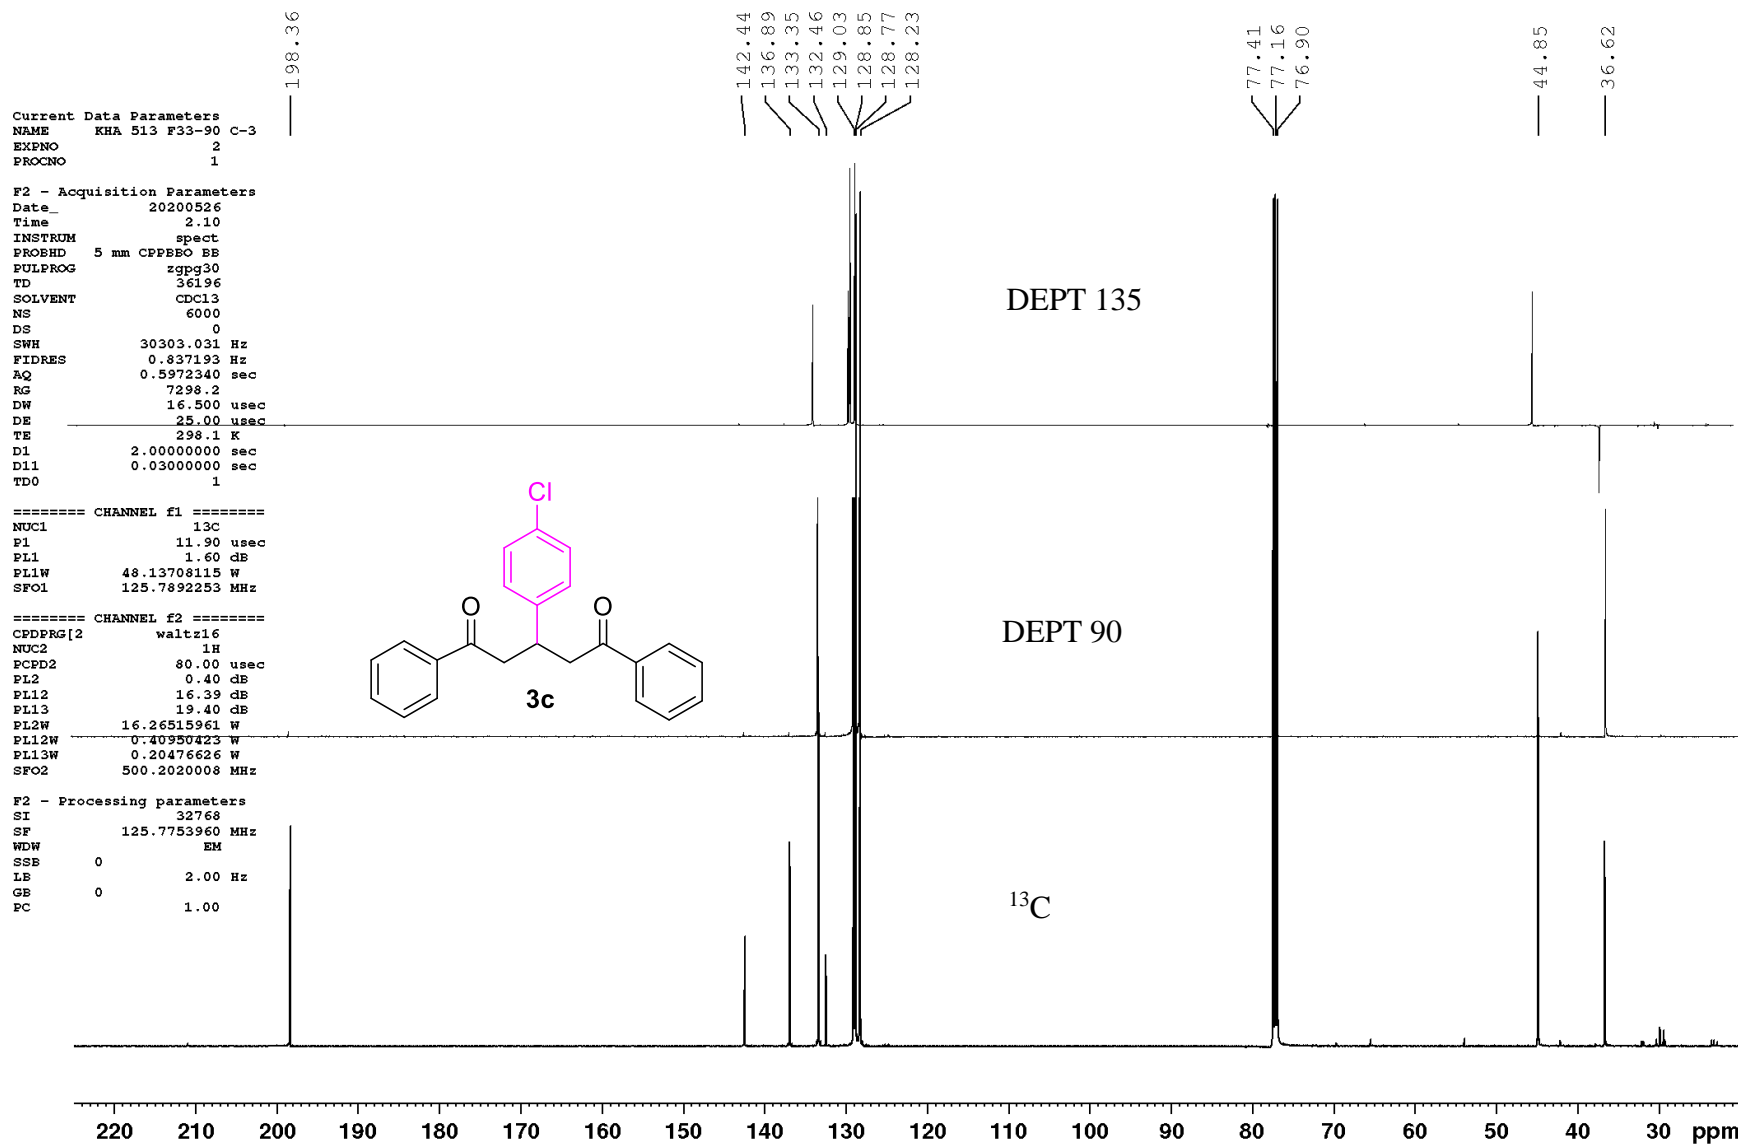

Figure S11. <sup>13</sup>C NMR spectrum of compound **3c** (125 MHz, CDCl<sub>3</sub>, 25 °C)

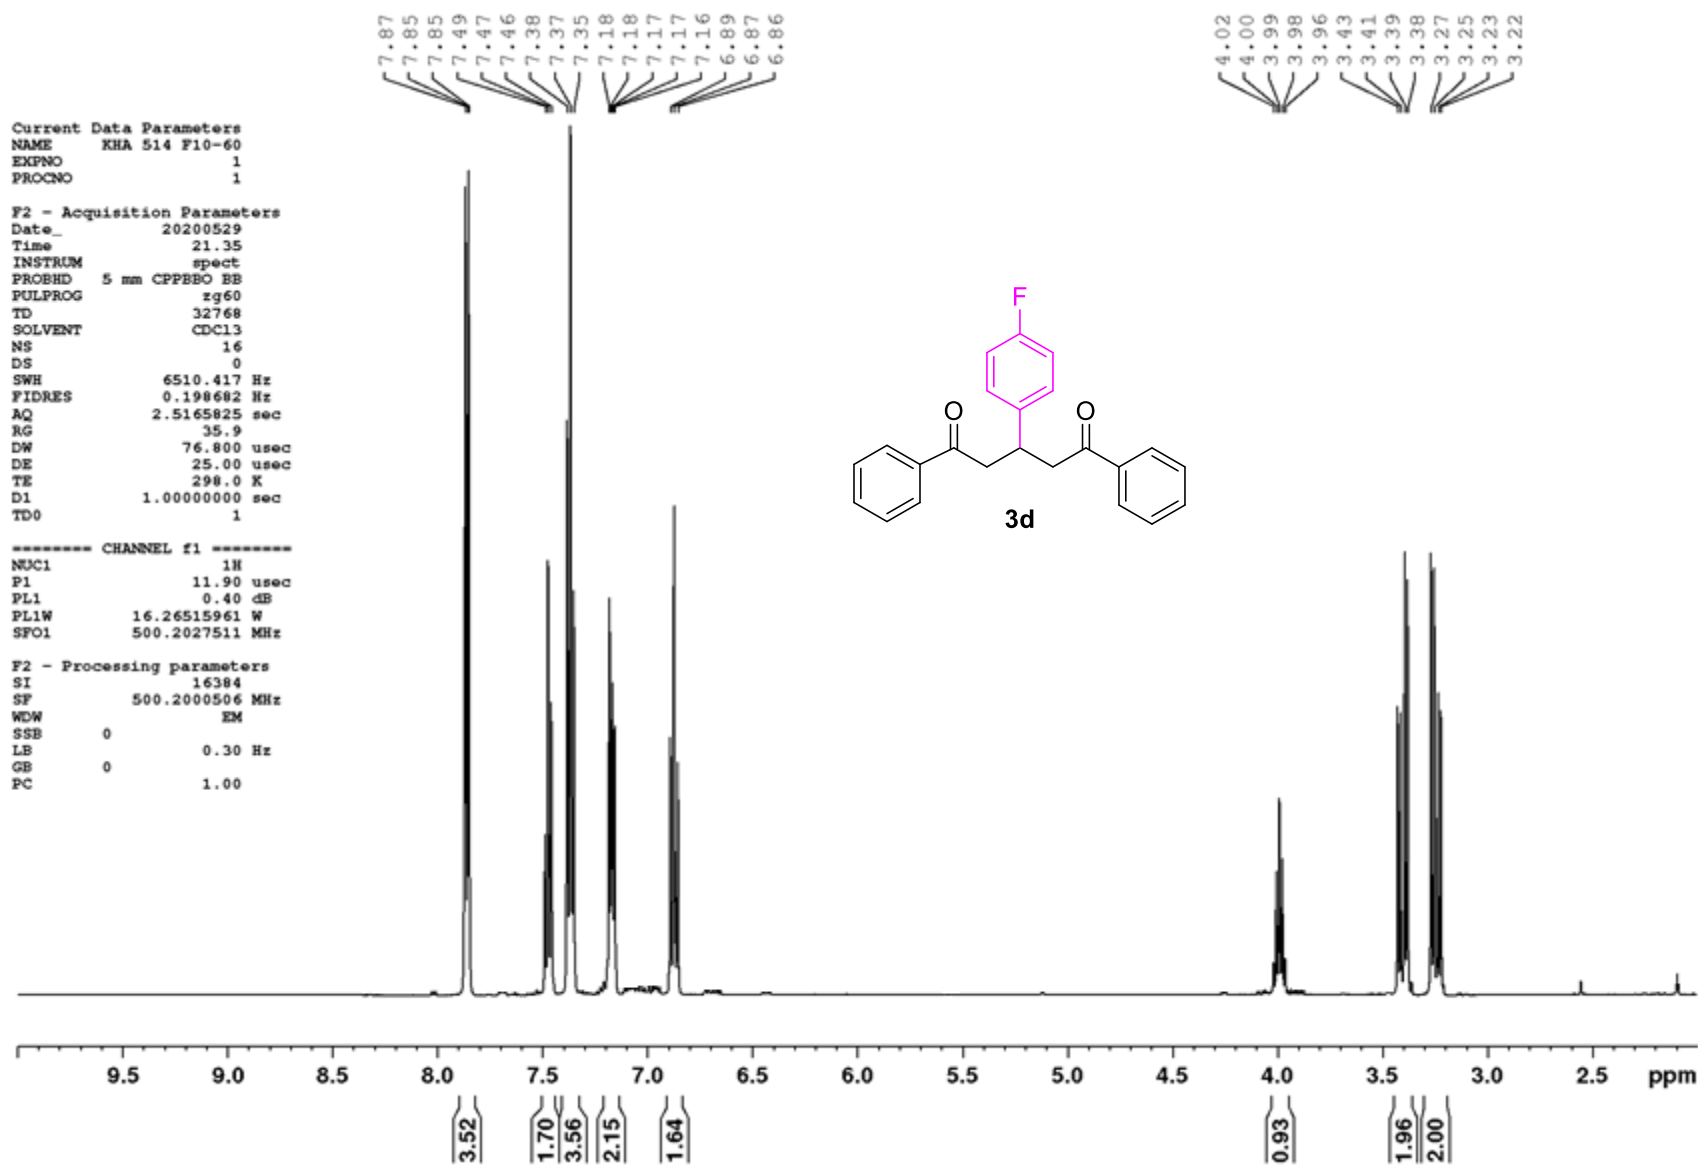

Figure S12.  $^1\text{H}$  NMR spectrum of compound **3d** (500 MHz,  $\text{CDCl}_3$ , 25  $^\circ\text{C}$ )

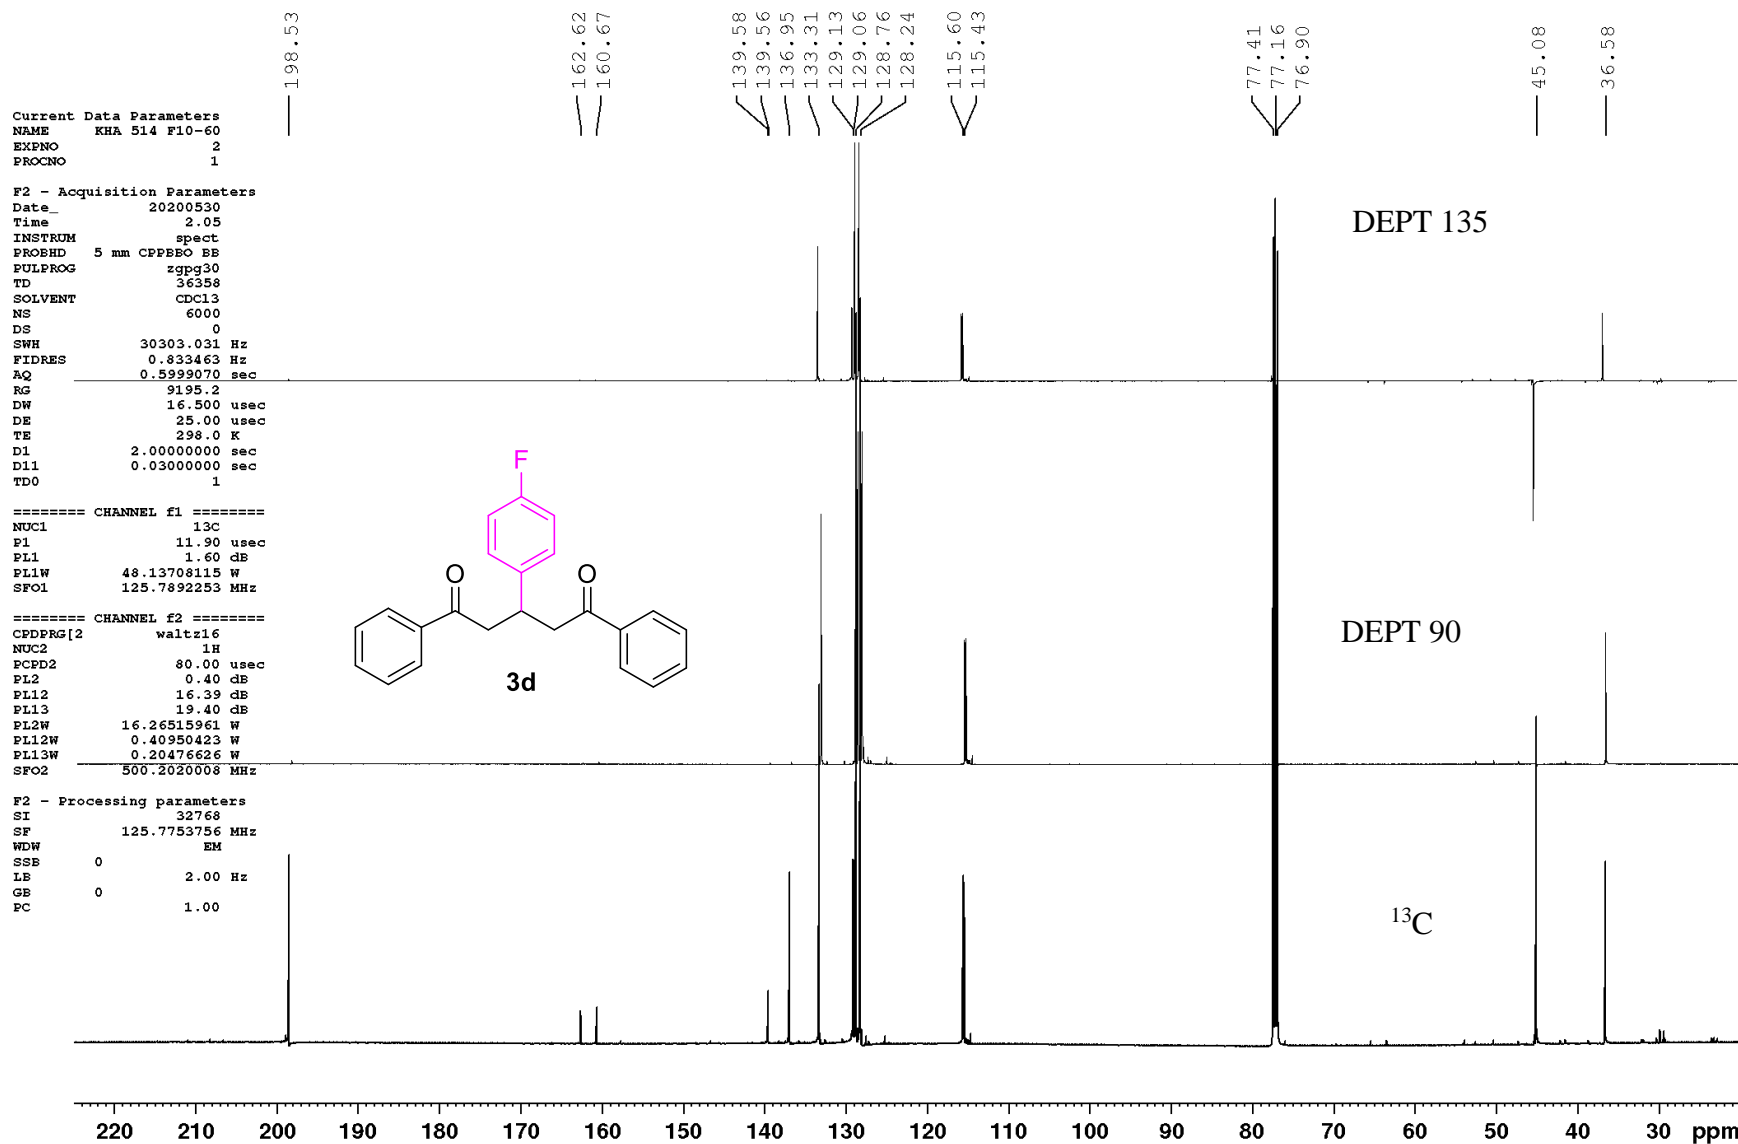

Figure S13. <sup>13</sup>C NMR spectrum of compound **3d** (125 MHz, CDCl<sub>3</sub>, 25 °C)

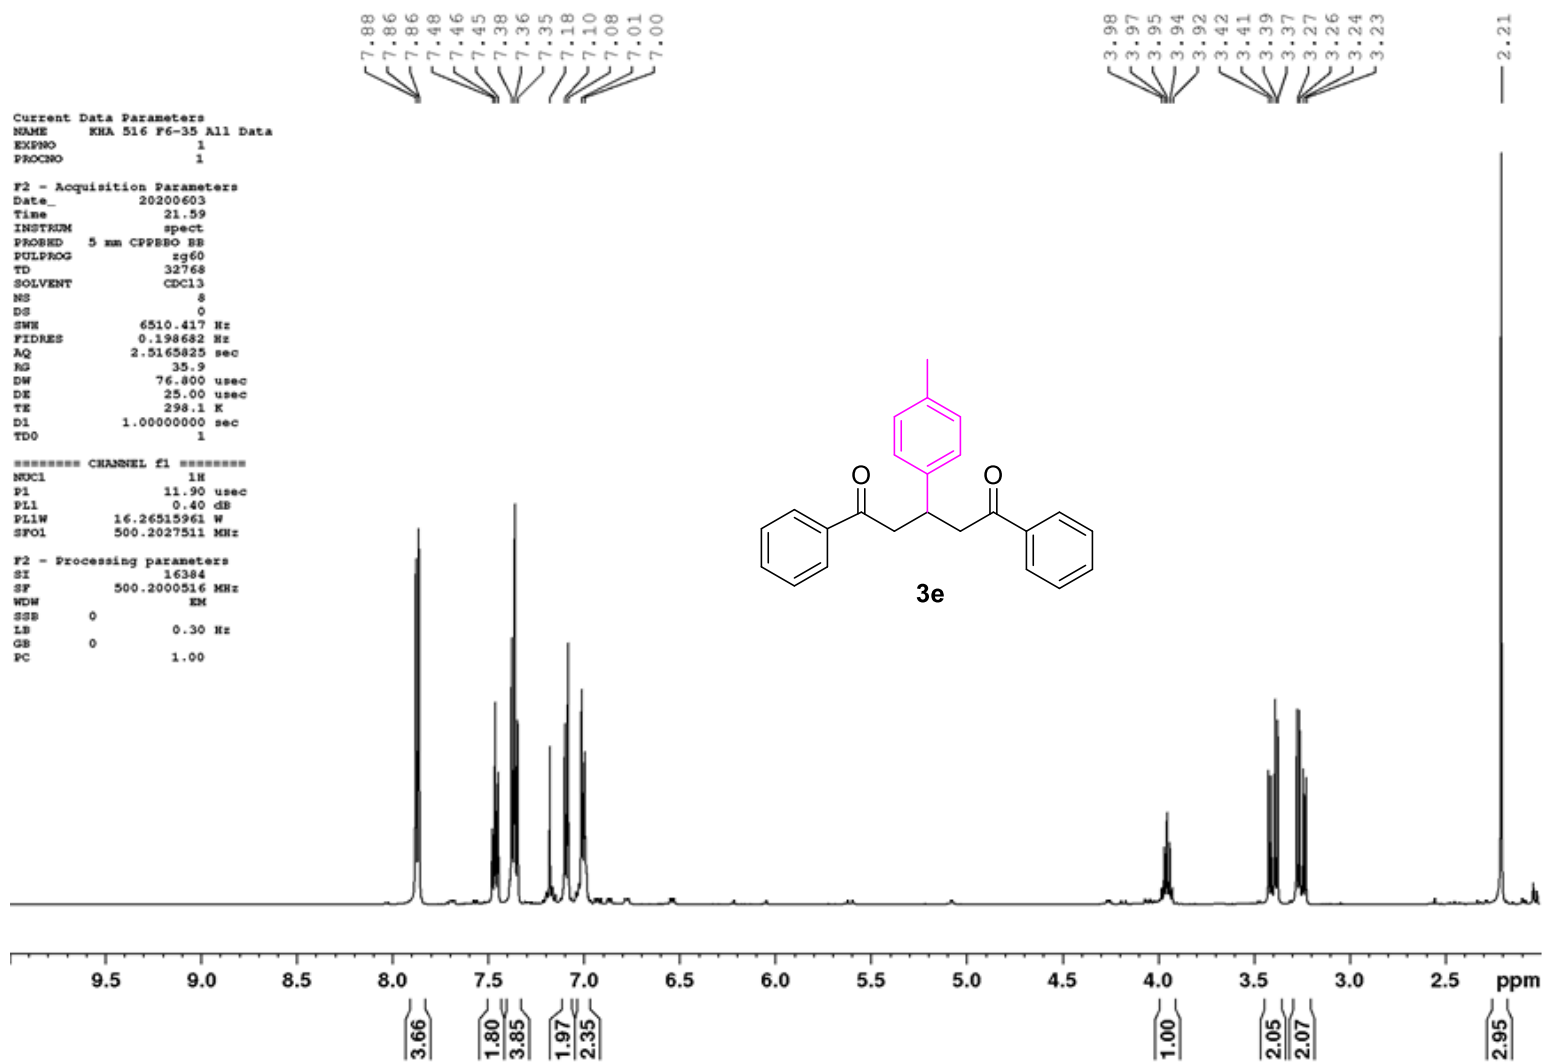

Figure S14.  $^1\text{H}$  NMR spectrum of compound **3e** (500 MHz,  $\text{CDCl}_3$ , 25  $^\circ\text{C}$ )



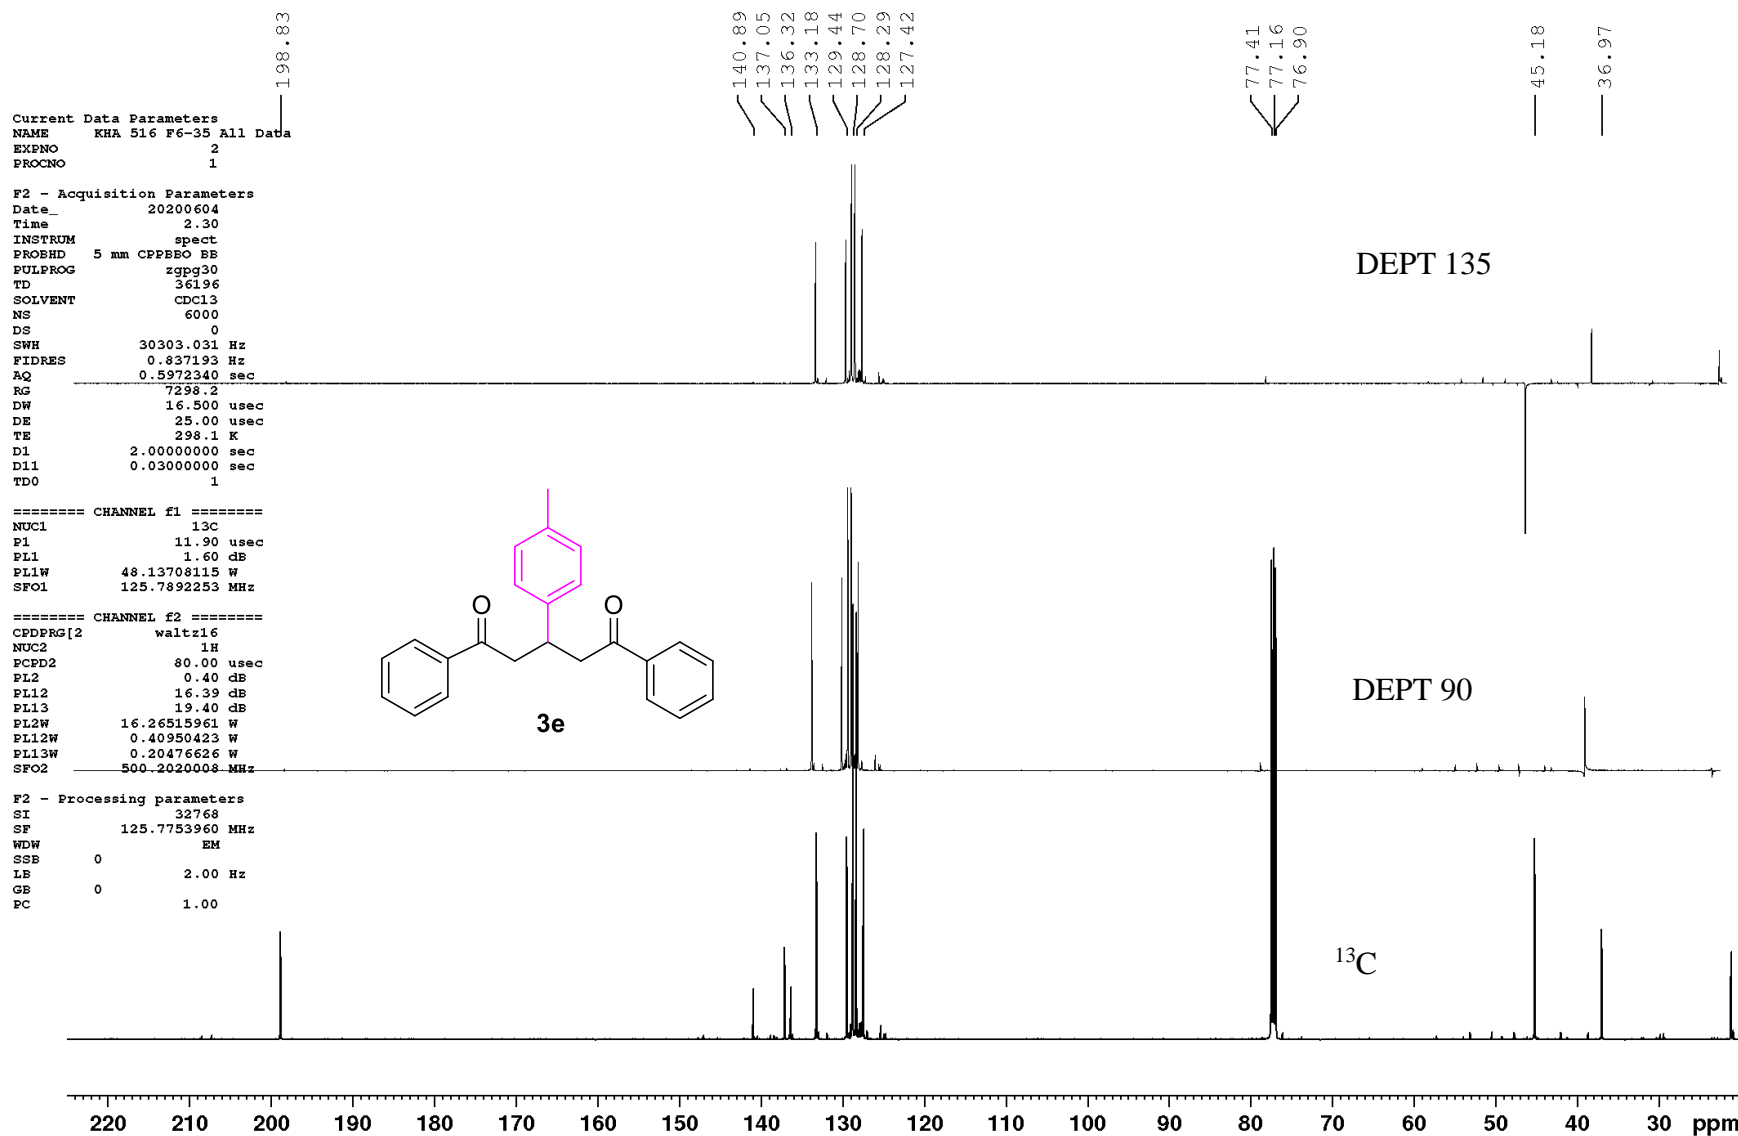

Figure S15. <sup>13</sup>C NMR spectrum of compound 3e (125 MHz, CDCl<sub>3</sub>, 25 °C)

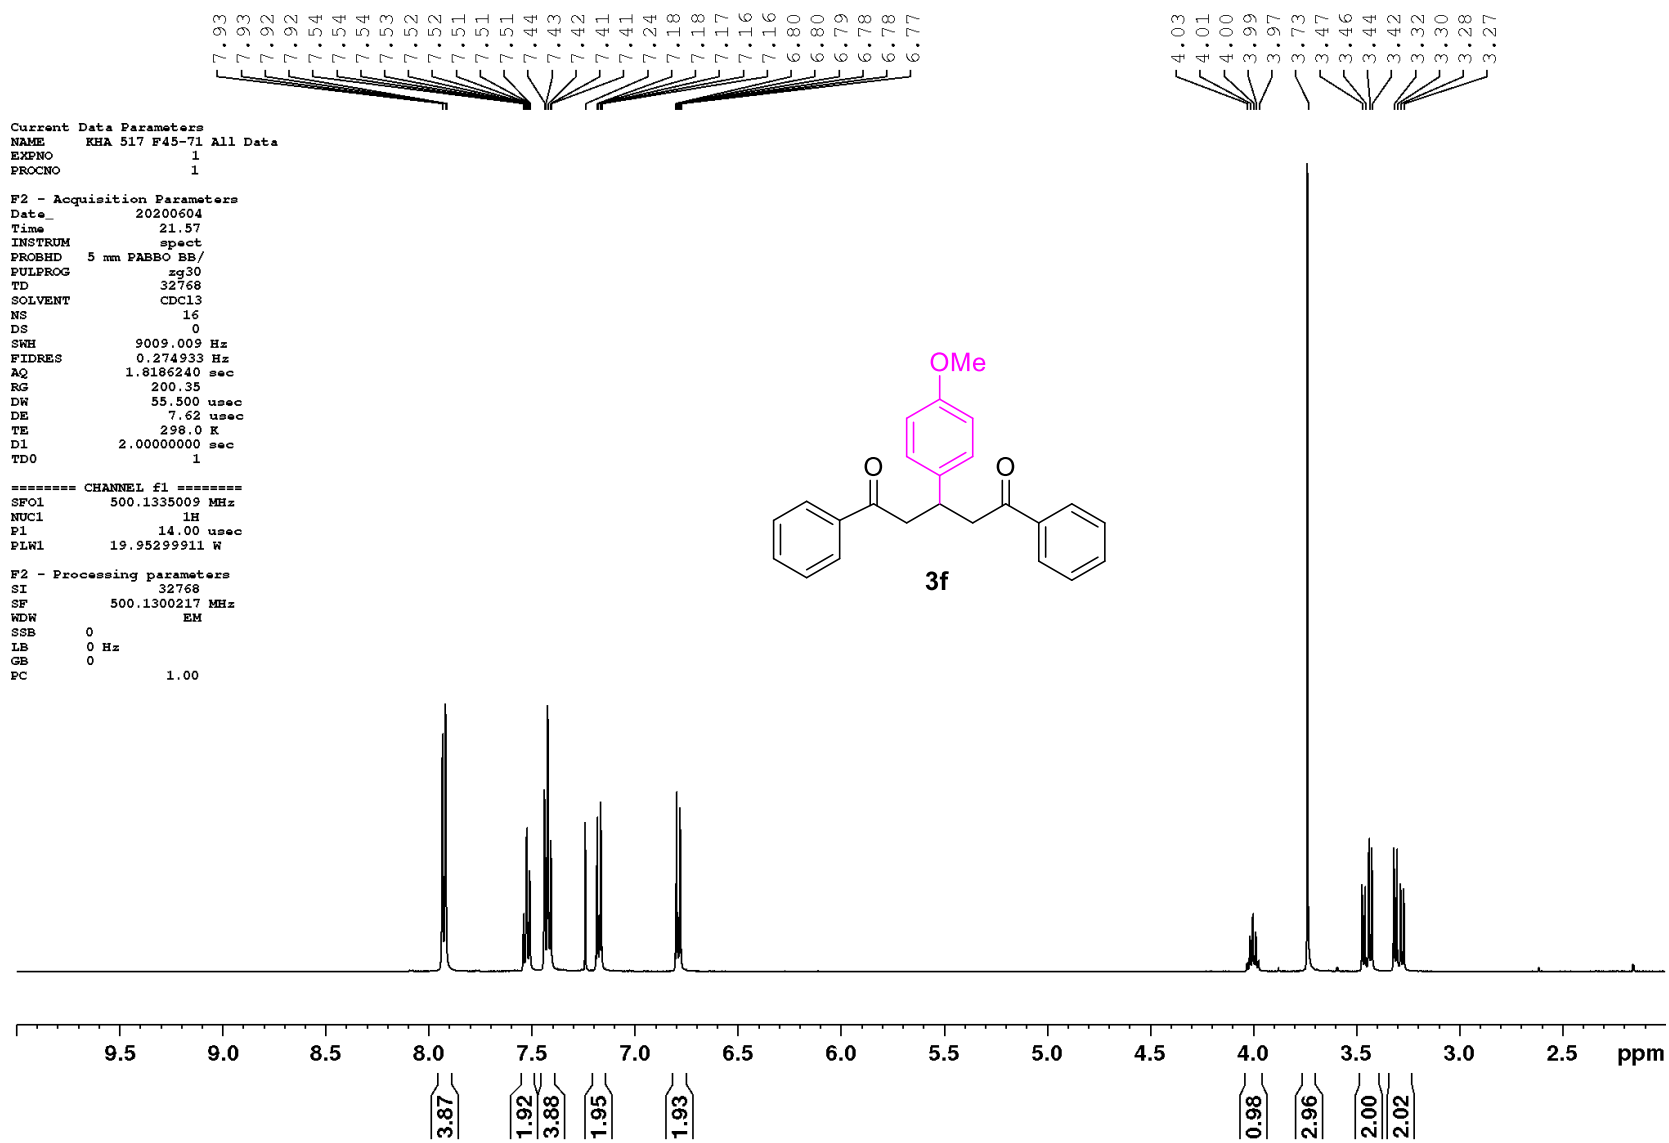

Figure S16. <sup>1</sup>H NMR spectrum of compound **3f** (500 MHz, CDCl<sub>3</sub>, 25 °C)

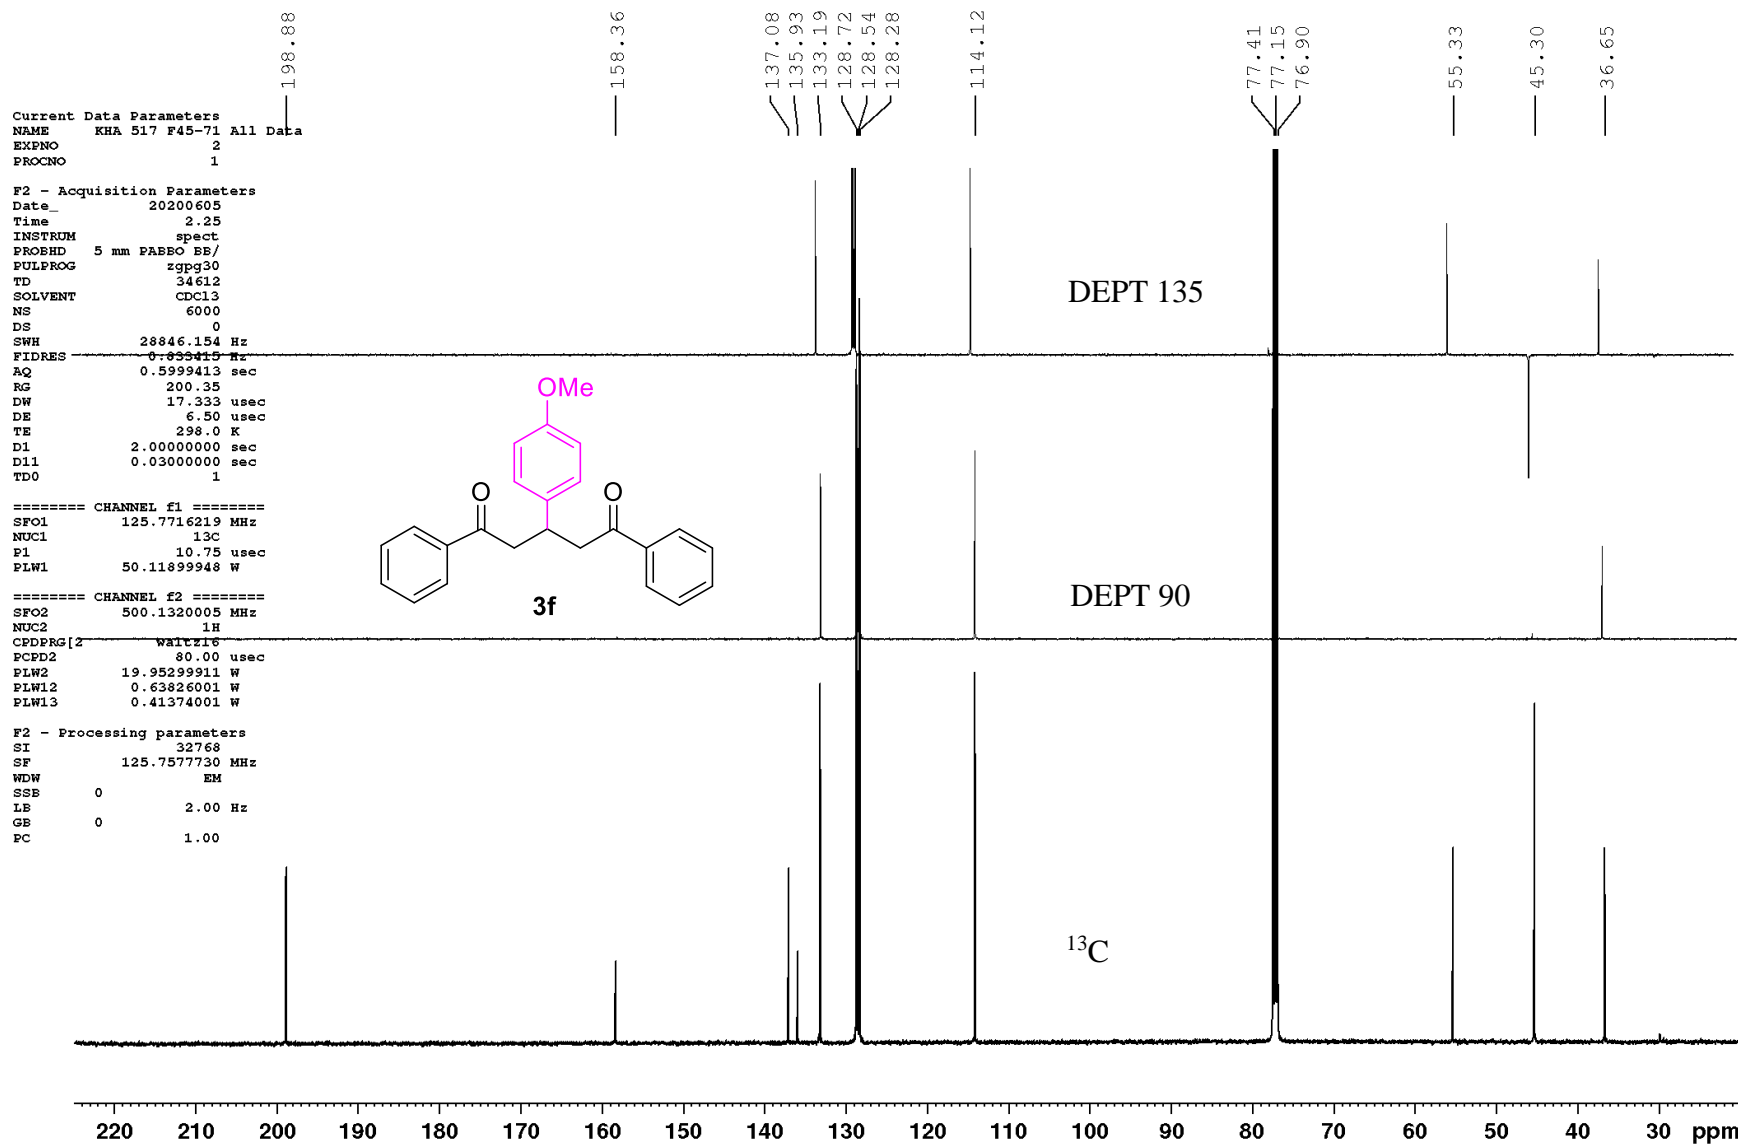

Figure S17. <sup>13</sup>C NMR spectrum of compound 3f (125 MHz, CDCl<sub>3</sub>, 25 °C)

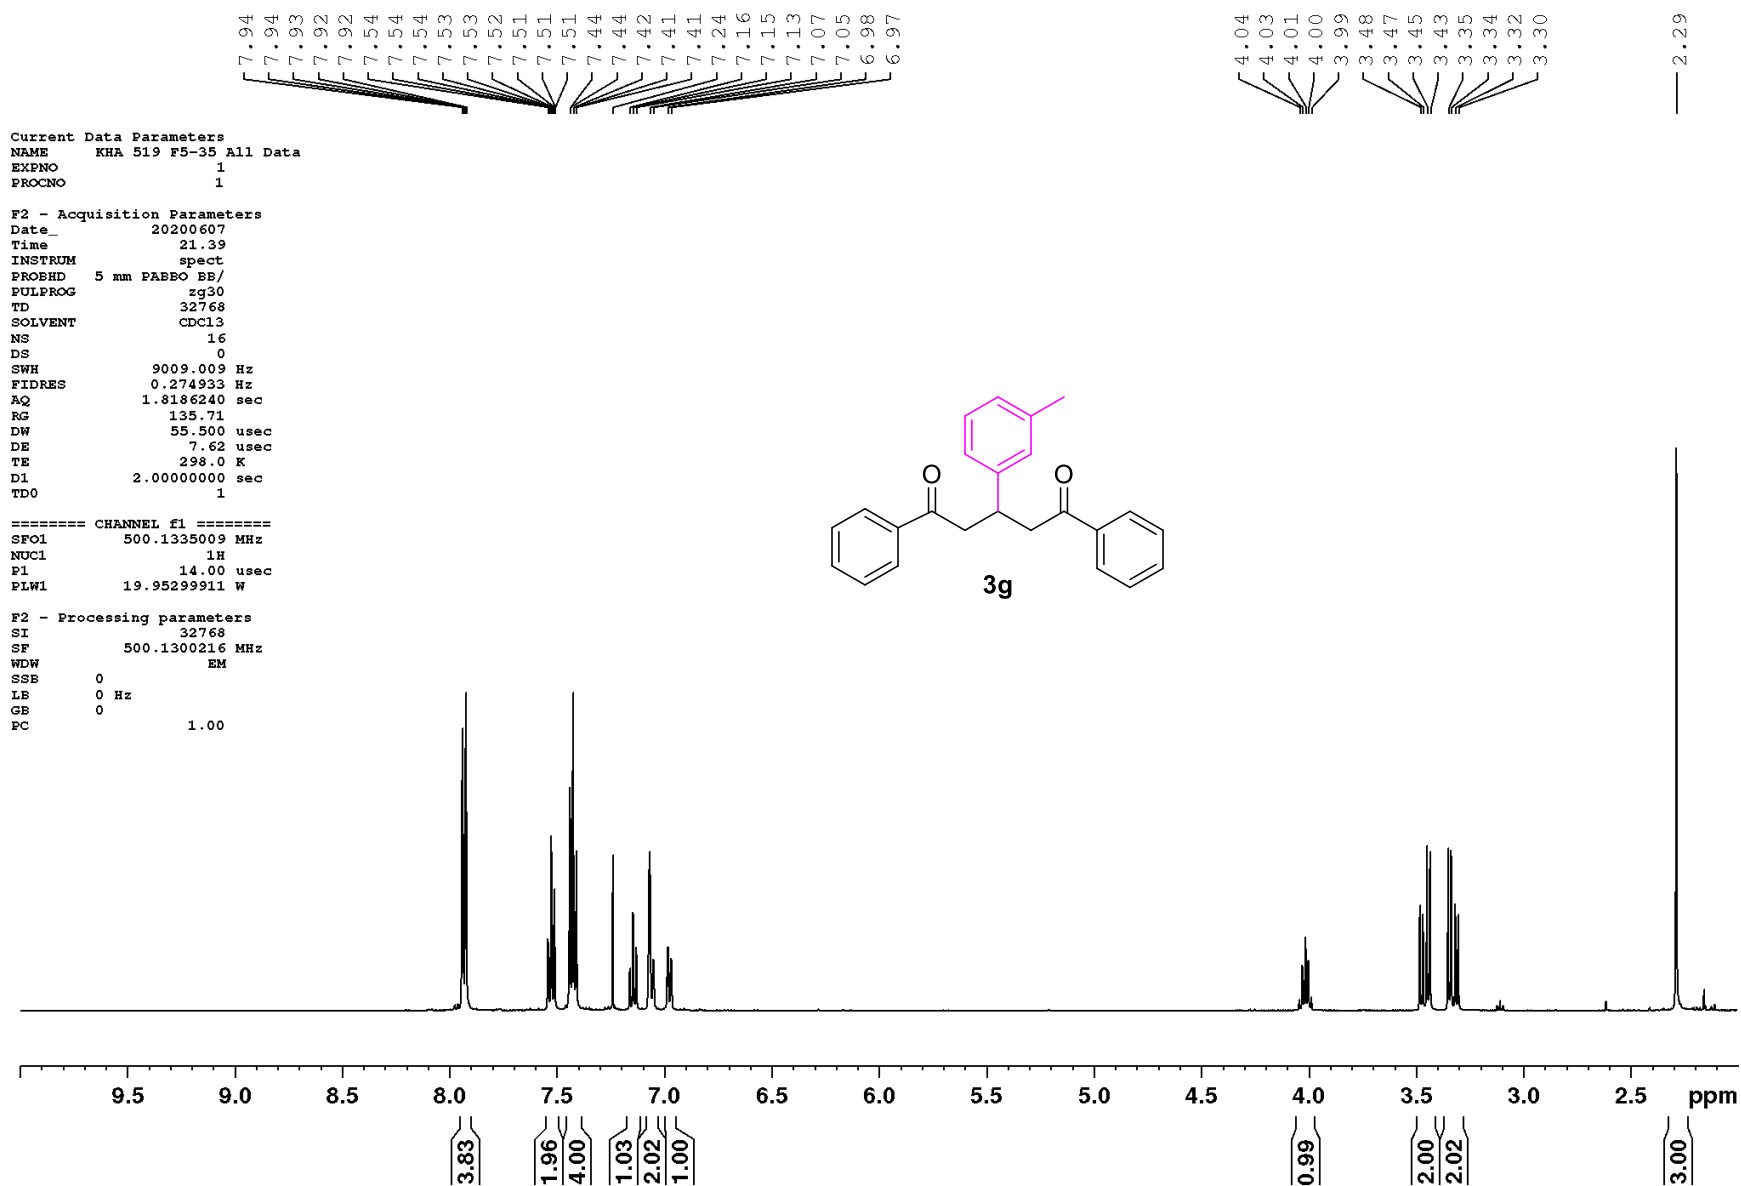

Figure S18. <sup>1</sup>H NMR spectrum of compound **3g** (500 MHz, CDCl<sub>3</sub>, 25 °C)

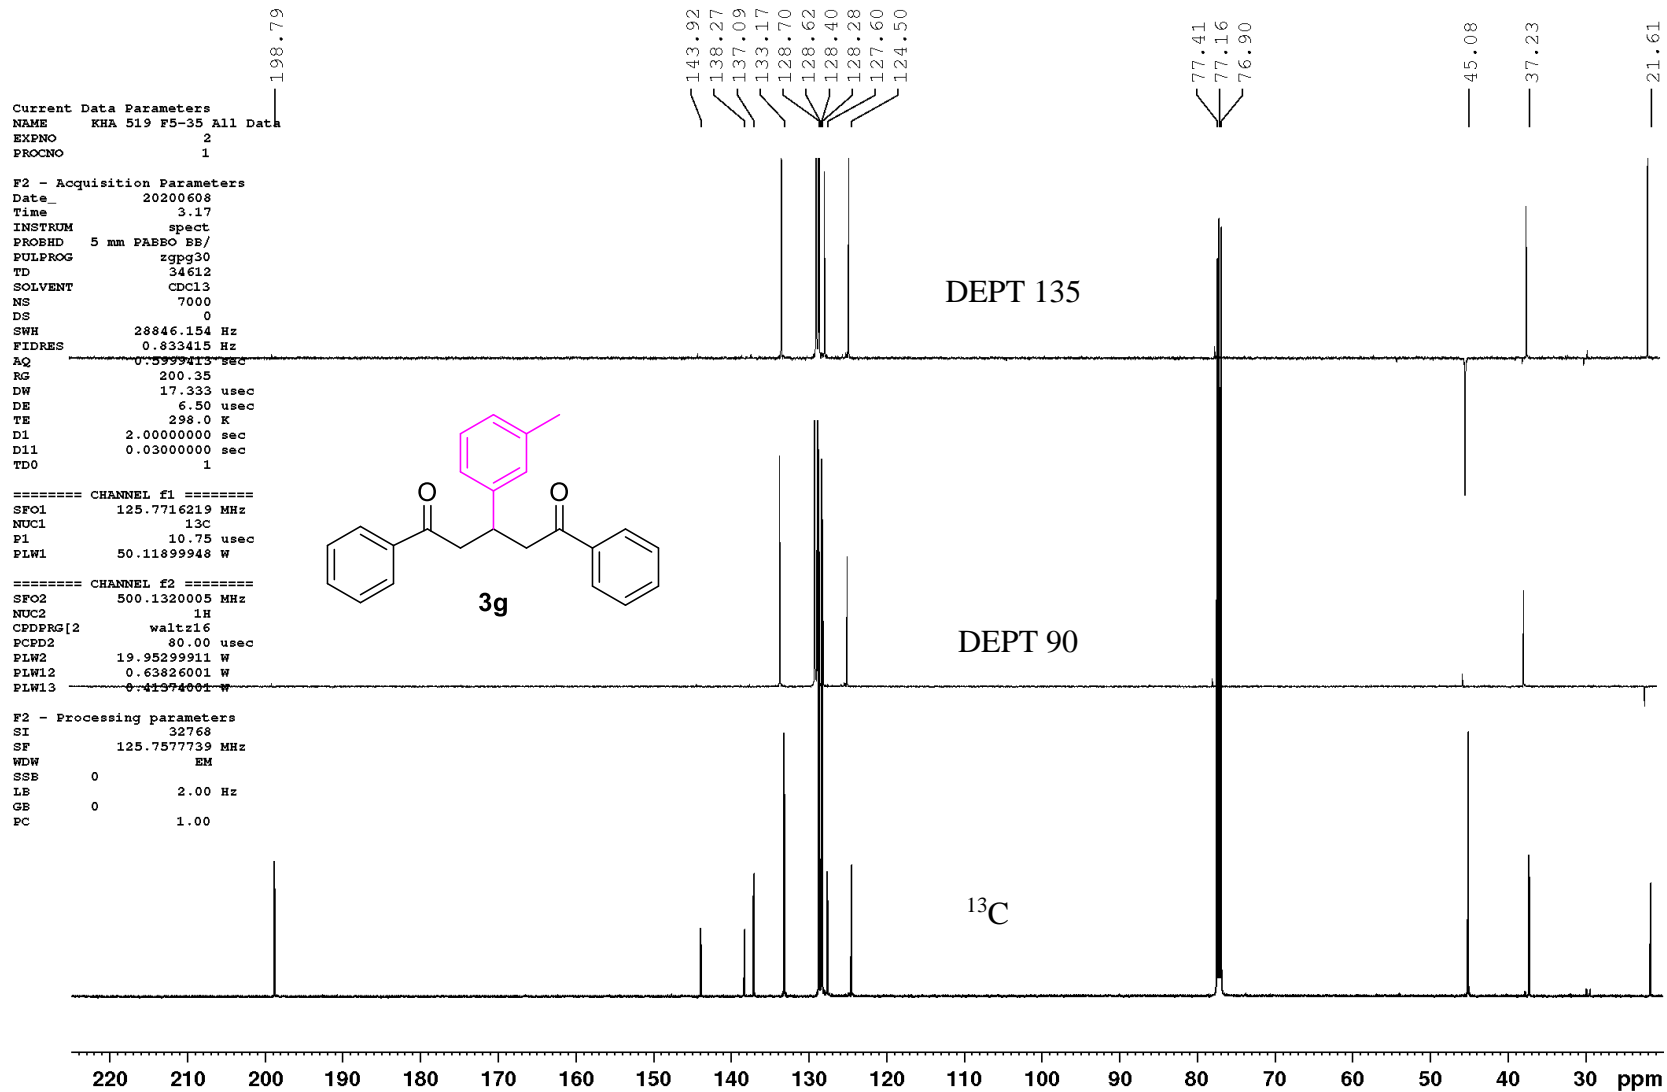

Figure S19. <sup>13</sup>C NMR spectrum of compound 3g (125 MHz, CDCl<sub>3</sub>, 25 °C)

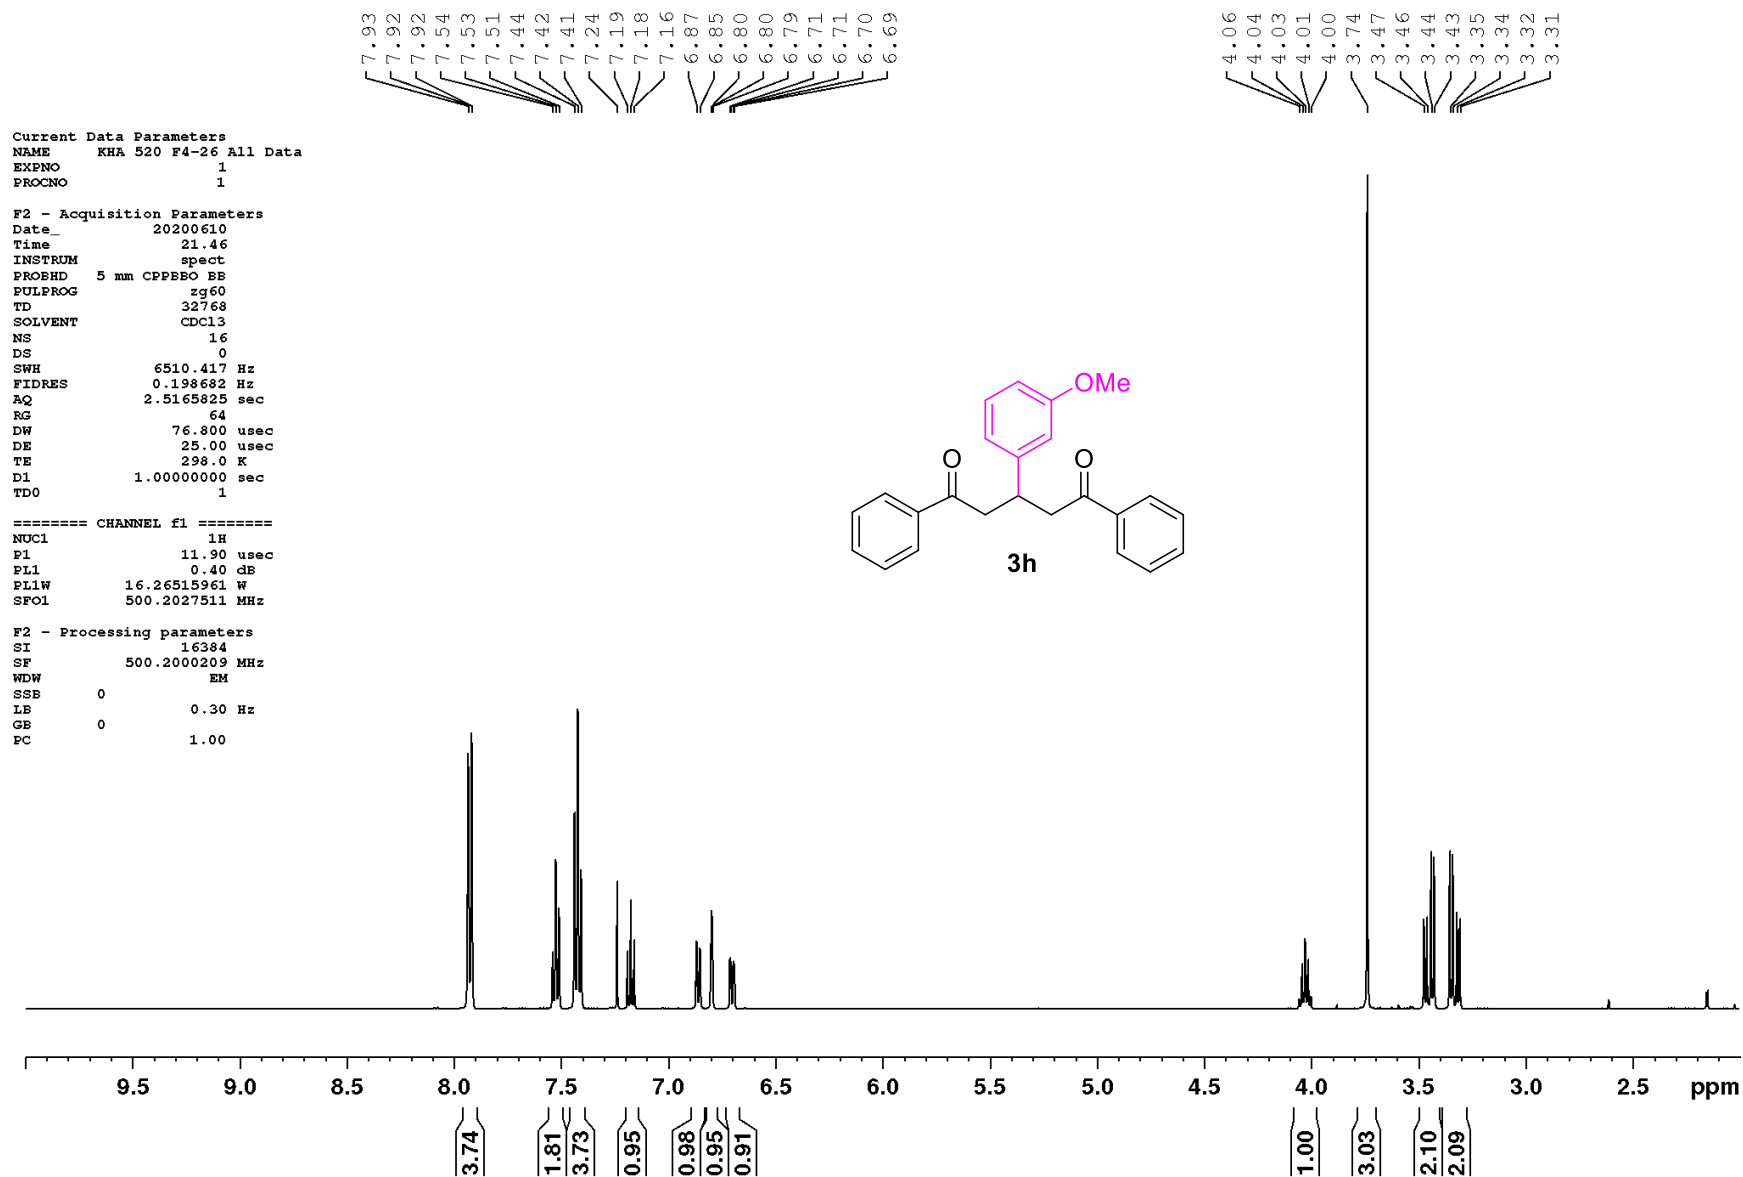

Figure S20.  $^1\text{H}$  NMR spectrum of compound **3h** (500 MHz,  $\text{CDCl}_3$ , 25  $^\circ\text{C}$ )

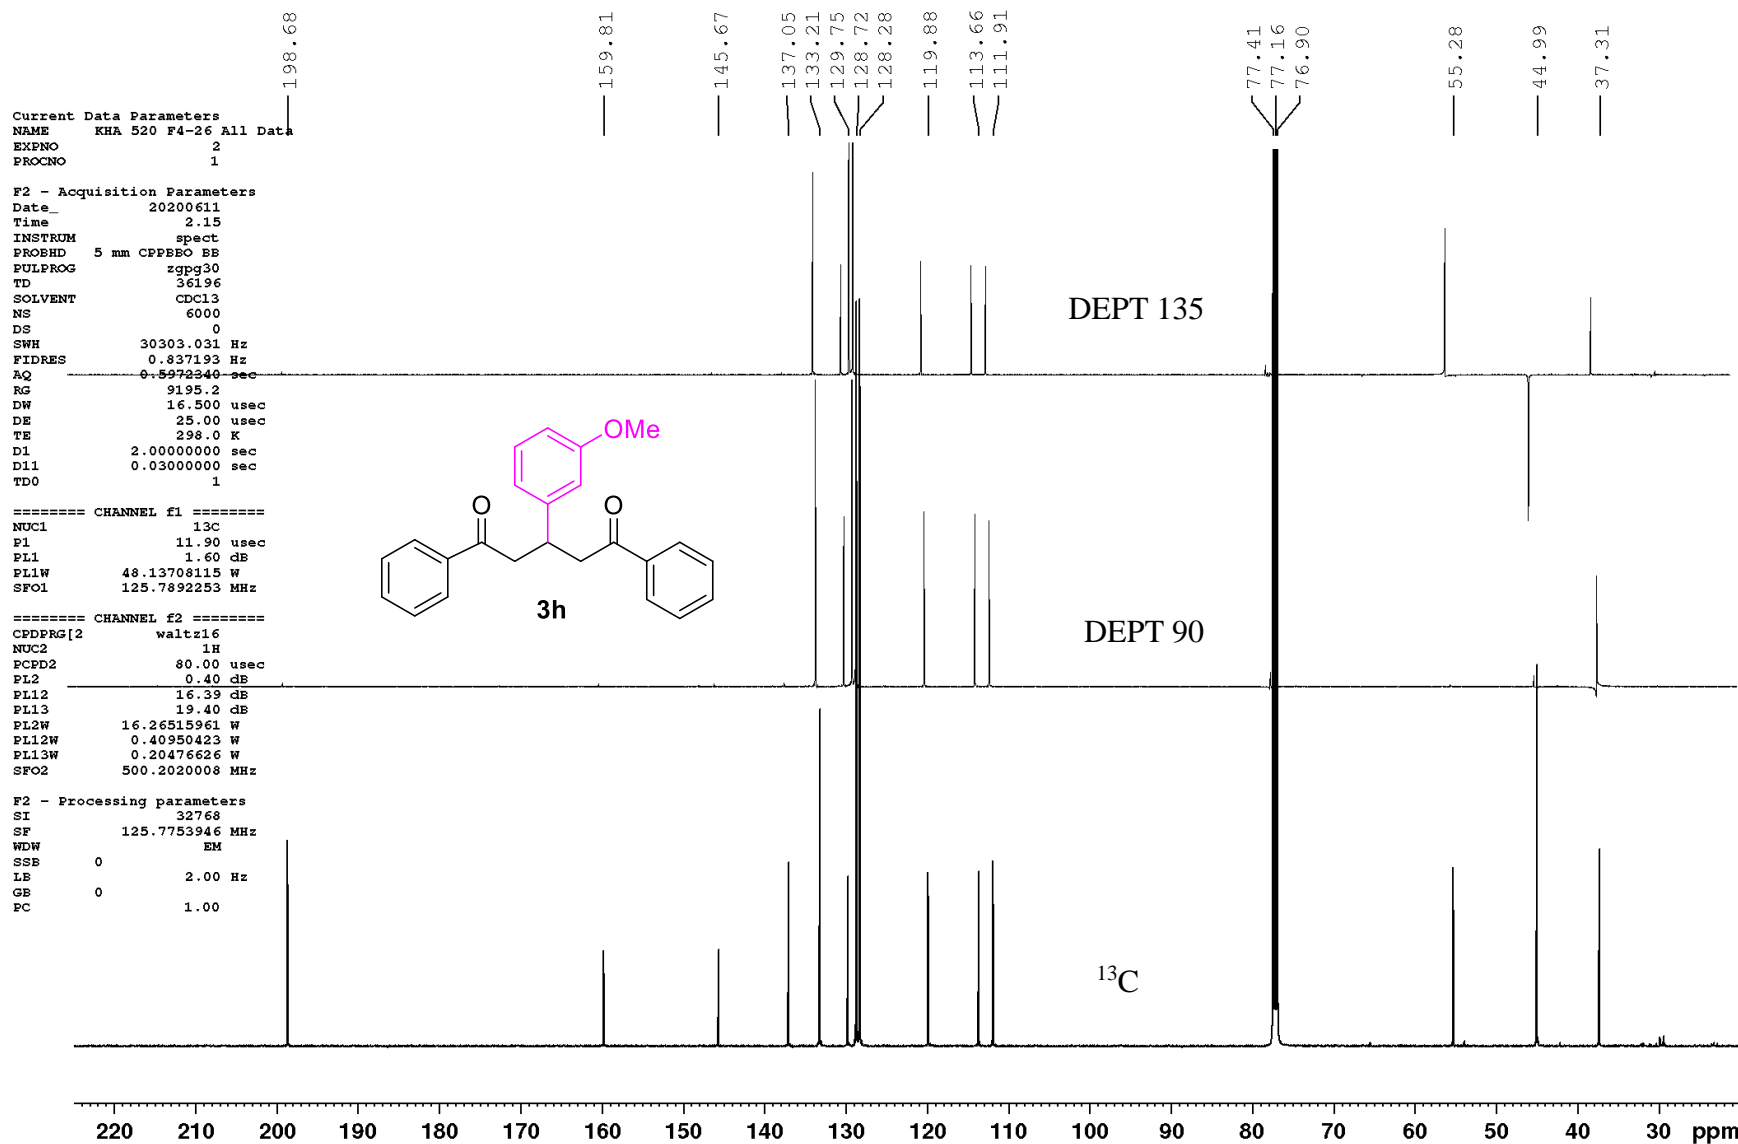

Figure S21. <sup>13</sup>C NMR spectrum of compound **3h** (125 MHz, CDCl<sub>3</sub>, 25 °C)

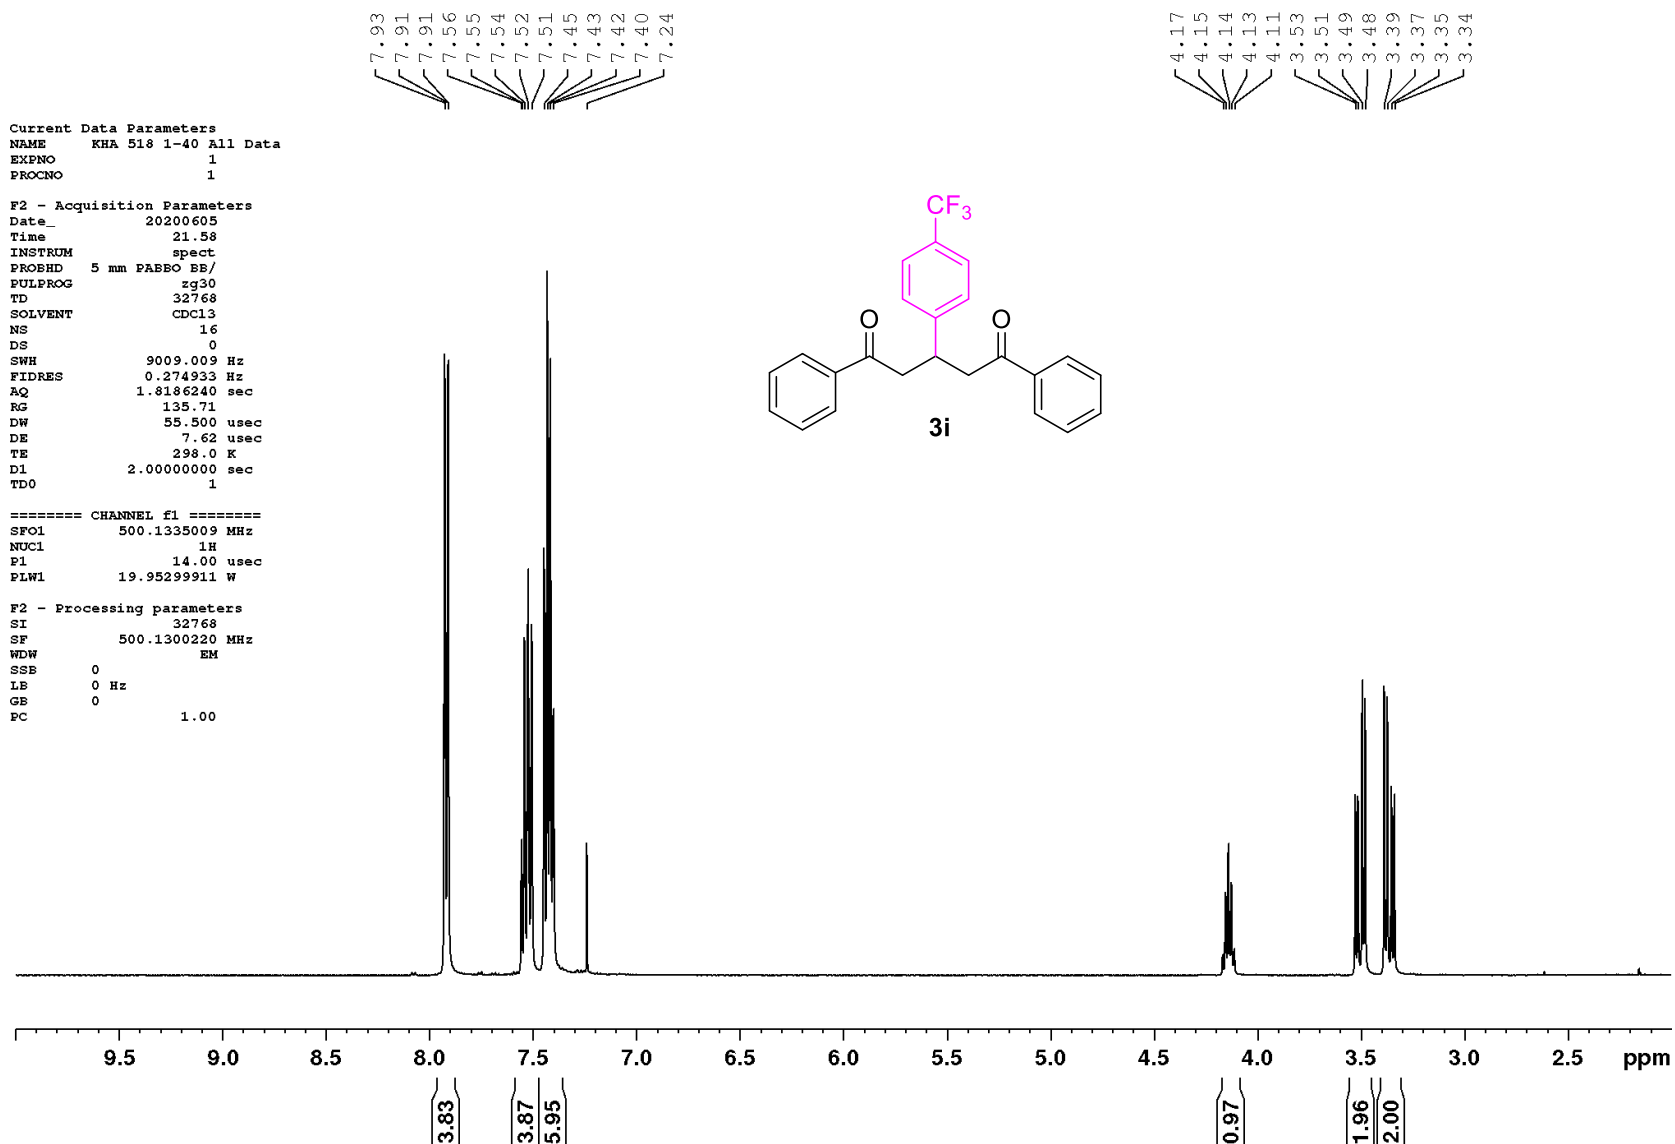

Figure S22. <sup>1</sup>H NMR spectrum of compound **3i** (500 MHz, CDCl<sub>3</sub>, 25 °C)



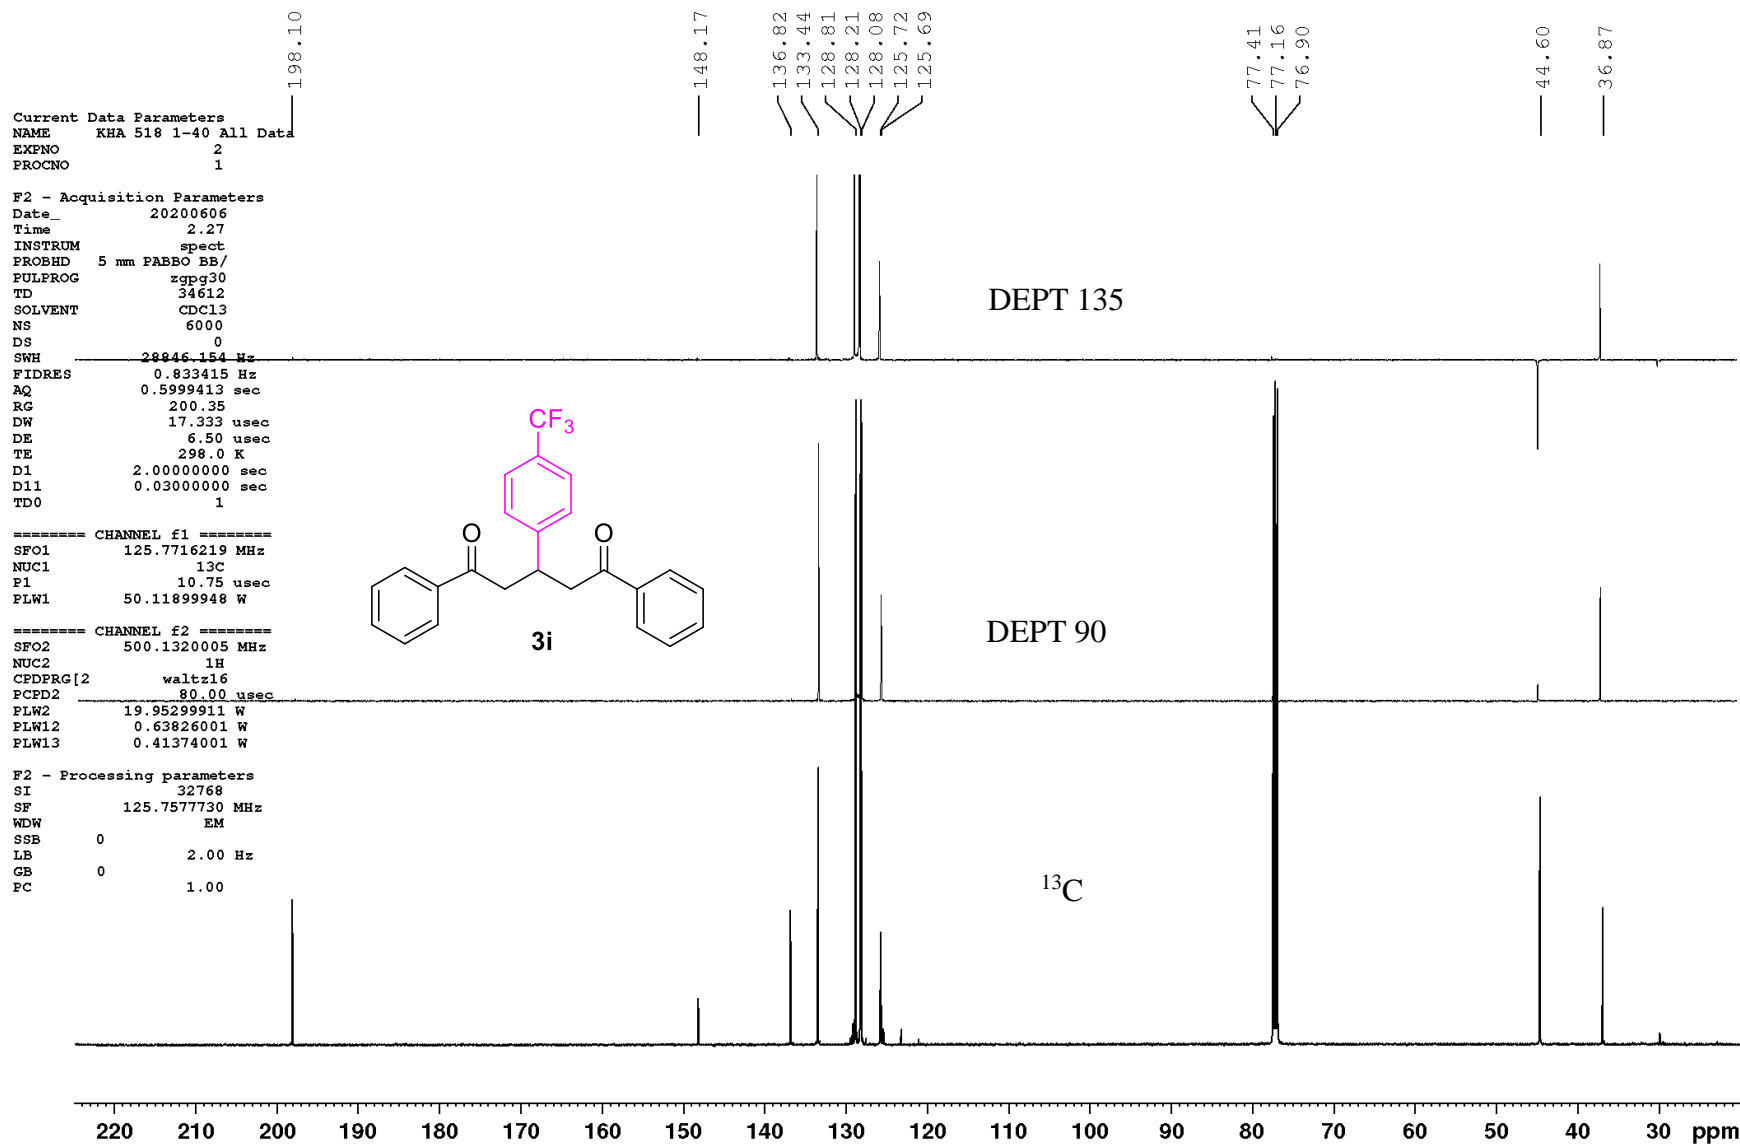

Figure S23. <sup>13</sup>C NMR spectrum of compound **3i** (125 MHz, CDCl<sub>3</sub>, 25 °C)

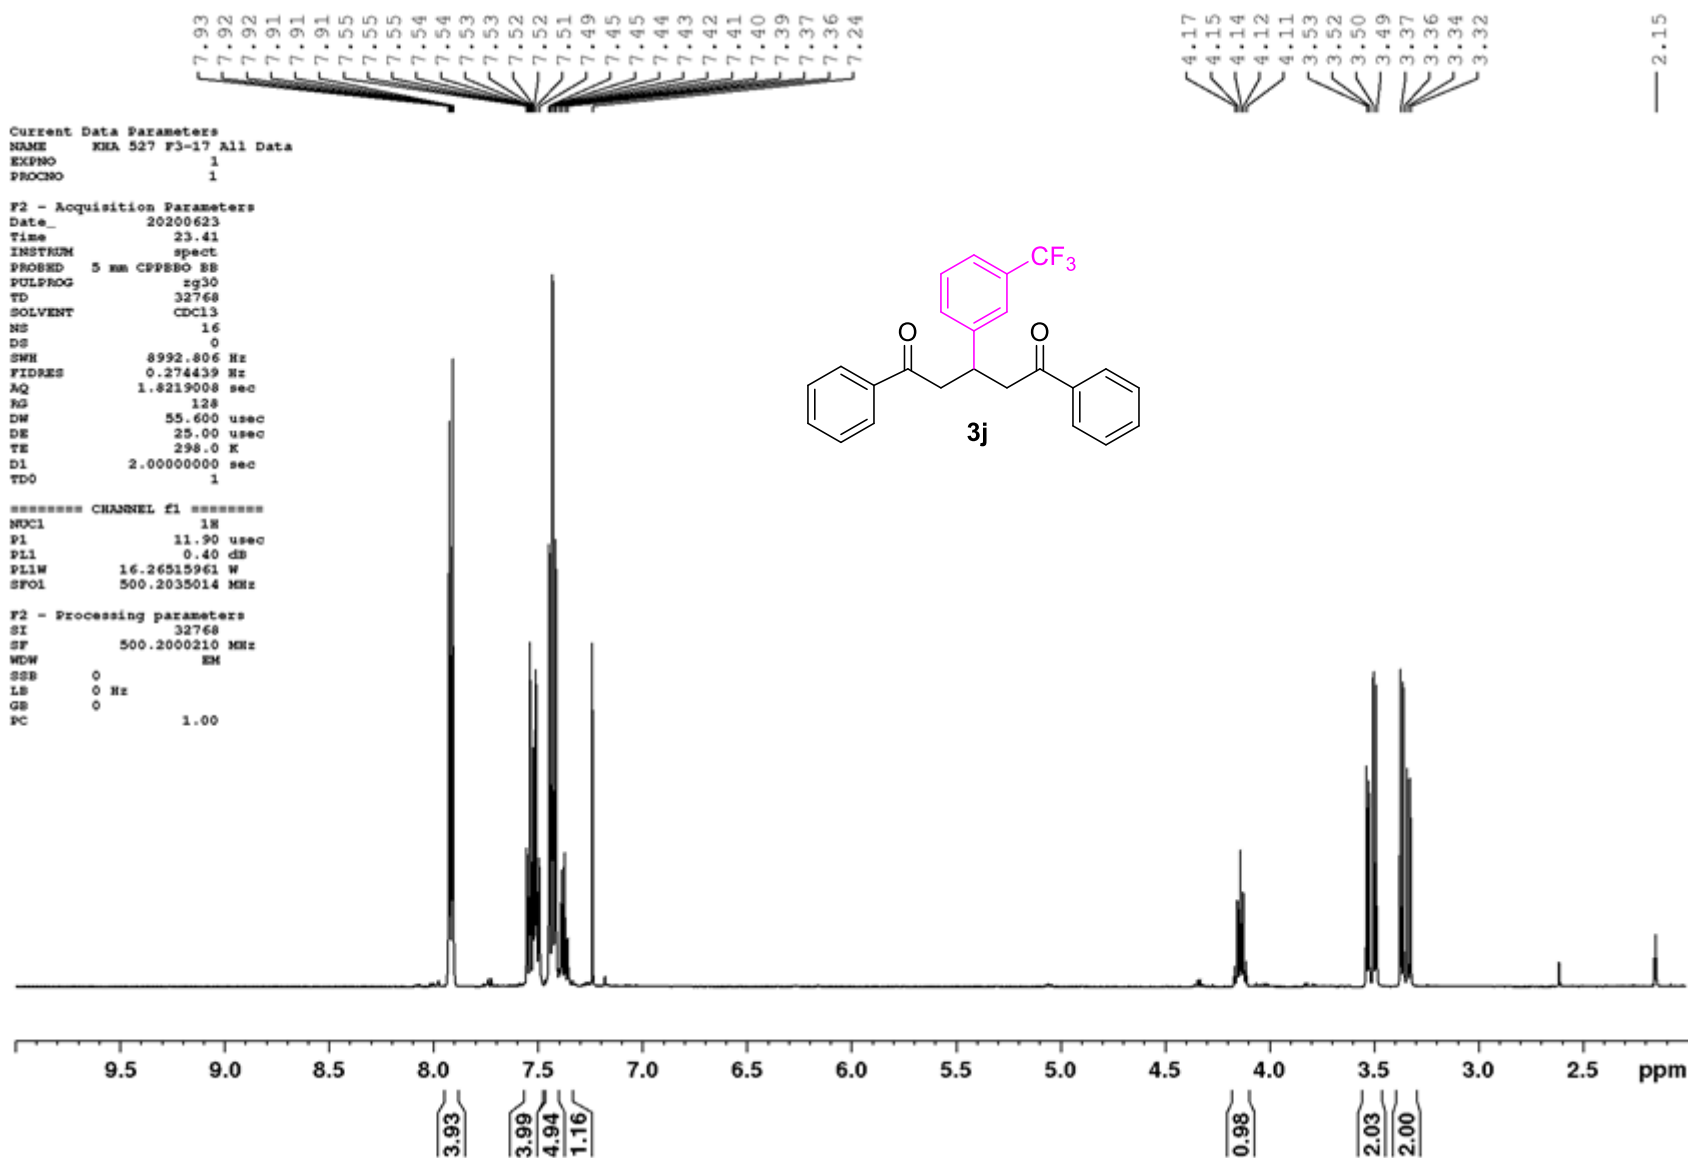

Figure S24. <sup>1</sup>H NMR spectrum of compound 3j (500 MHz, CDCl<sub>3</sub>, 25 °C)

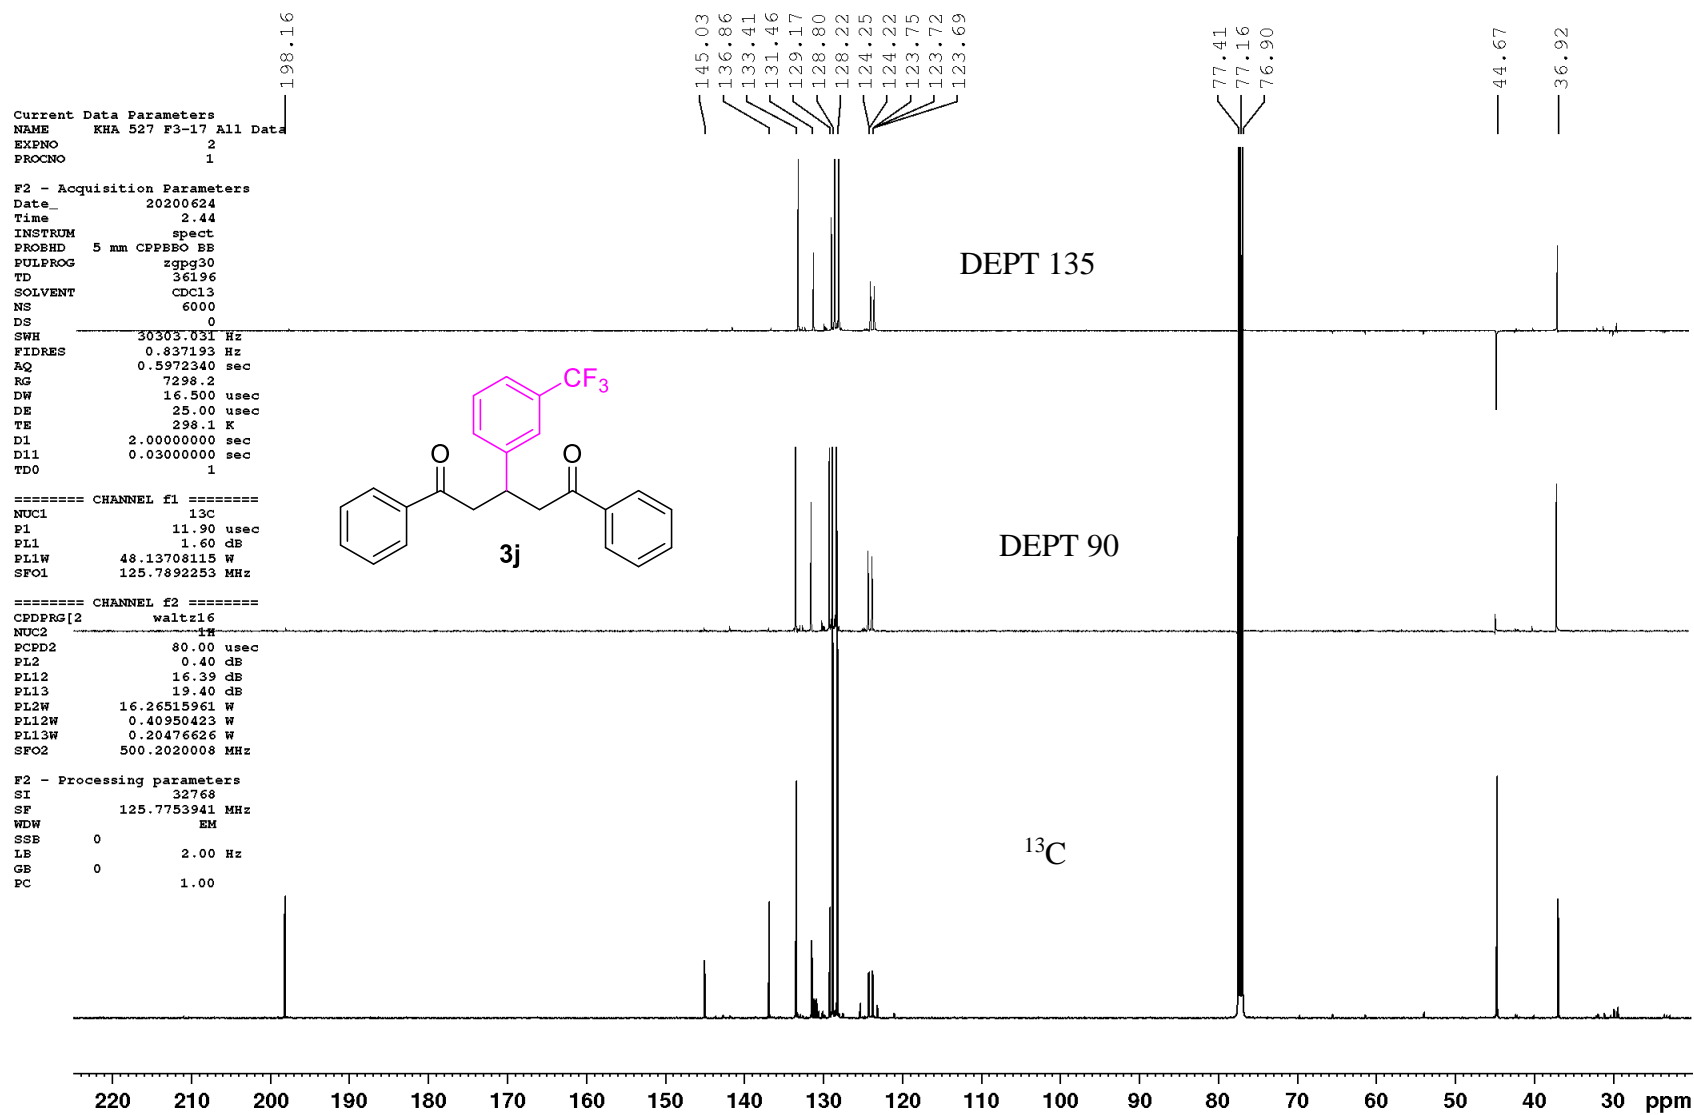

Figure S25. <sup>13</sup>C NMR spectrum of compound 3j (125 MHz, CDCl<sub>3</sub>, 25 °C)

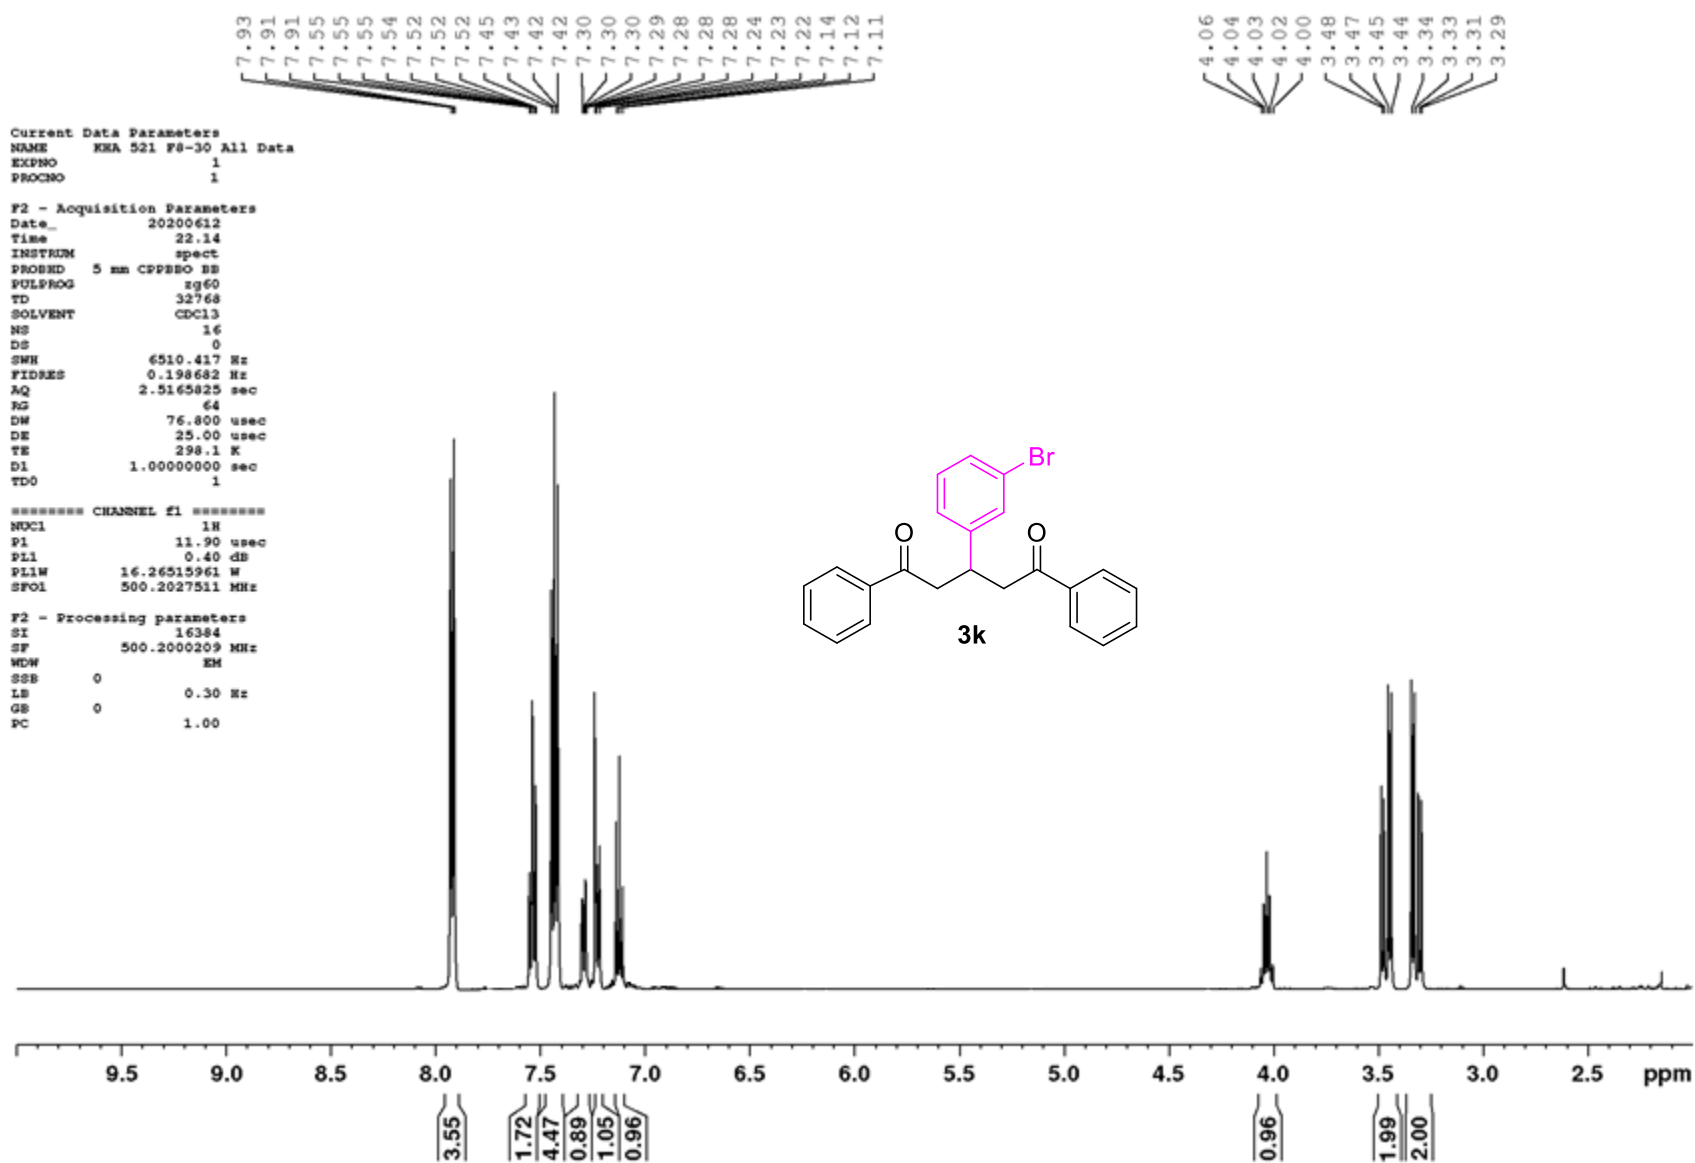

Figure S26. <sup>1</sup>H NMR spectrum of compound **3k** (500 MHz, CDCl<sub>3</sub>, 25 °C)

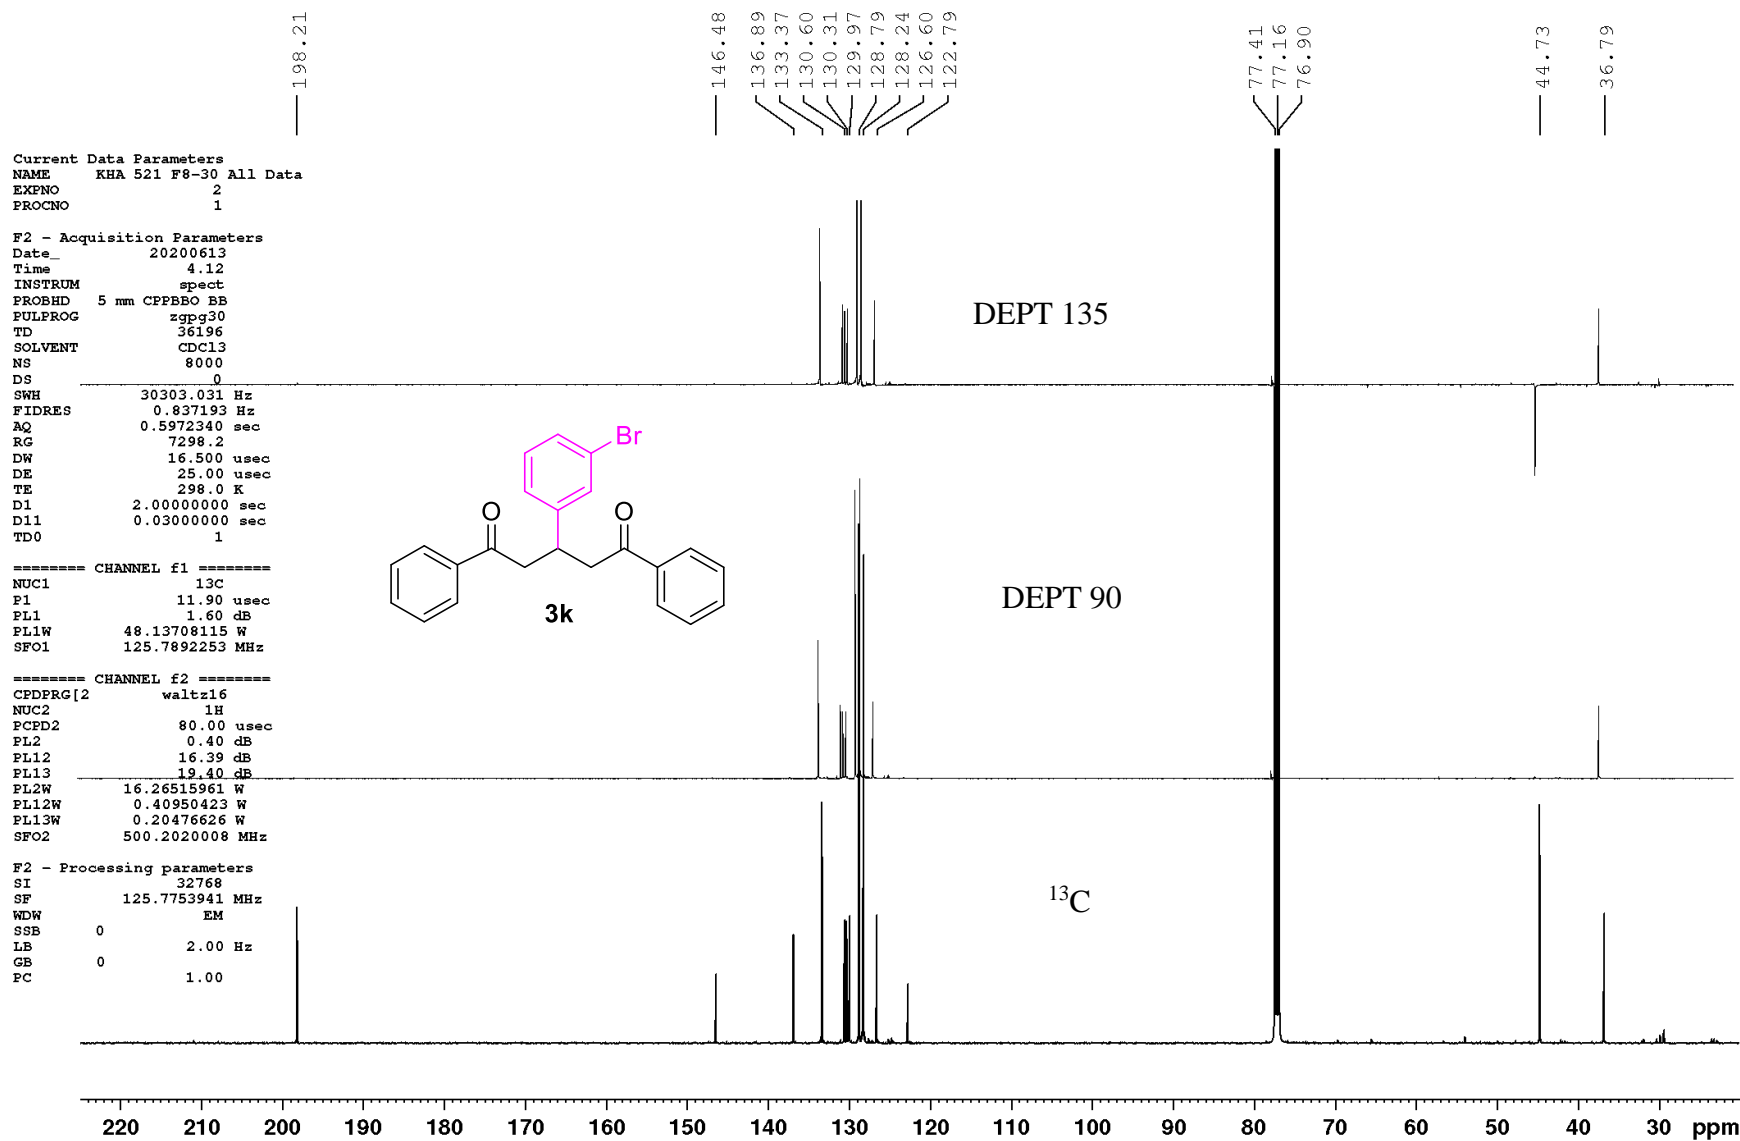

Figure S27. <sup>13</sup>C NMR spectrum of compound **3k** (125 MHz, CDCl<sub>3</sub>, 25 °C)

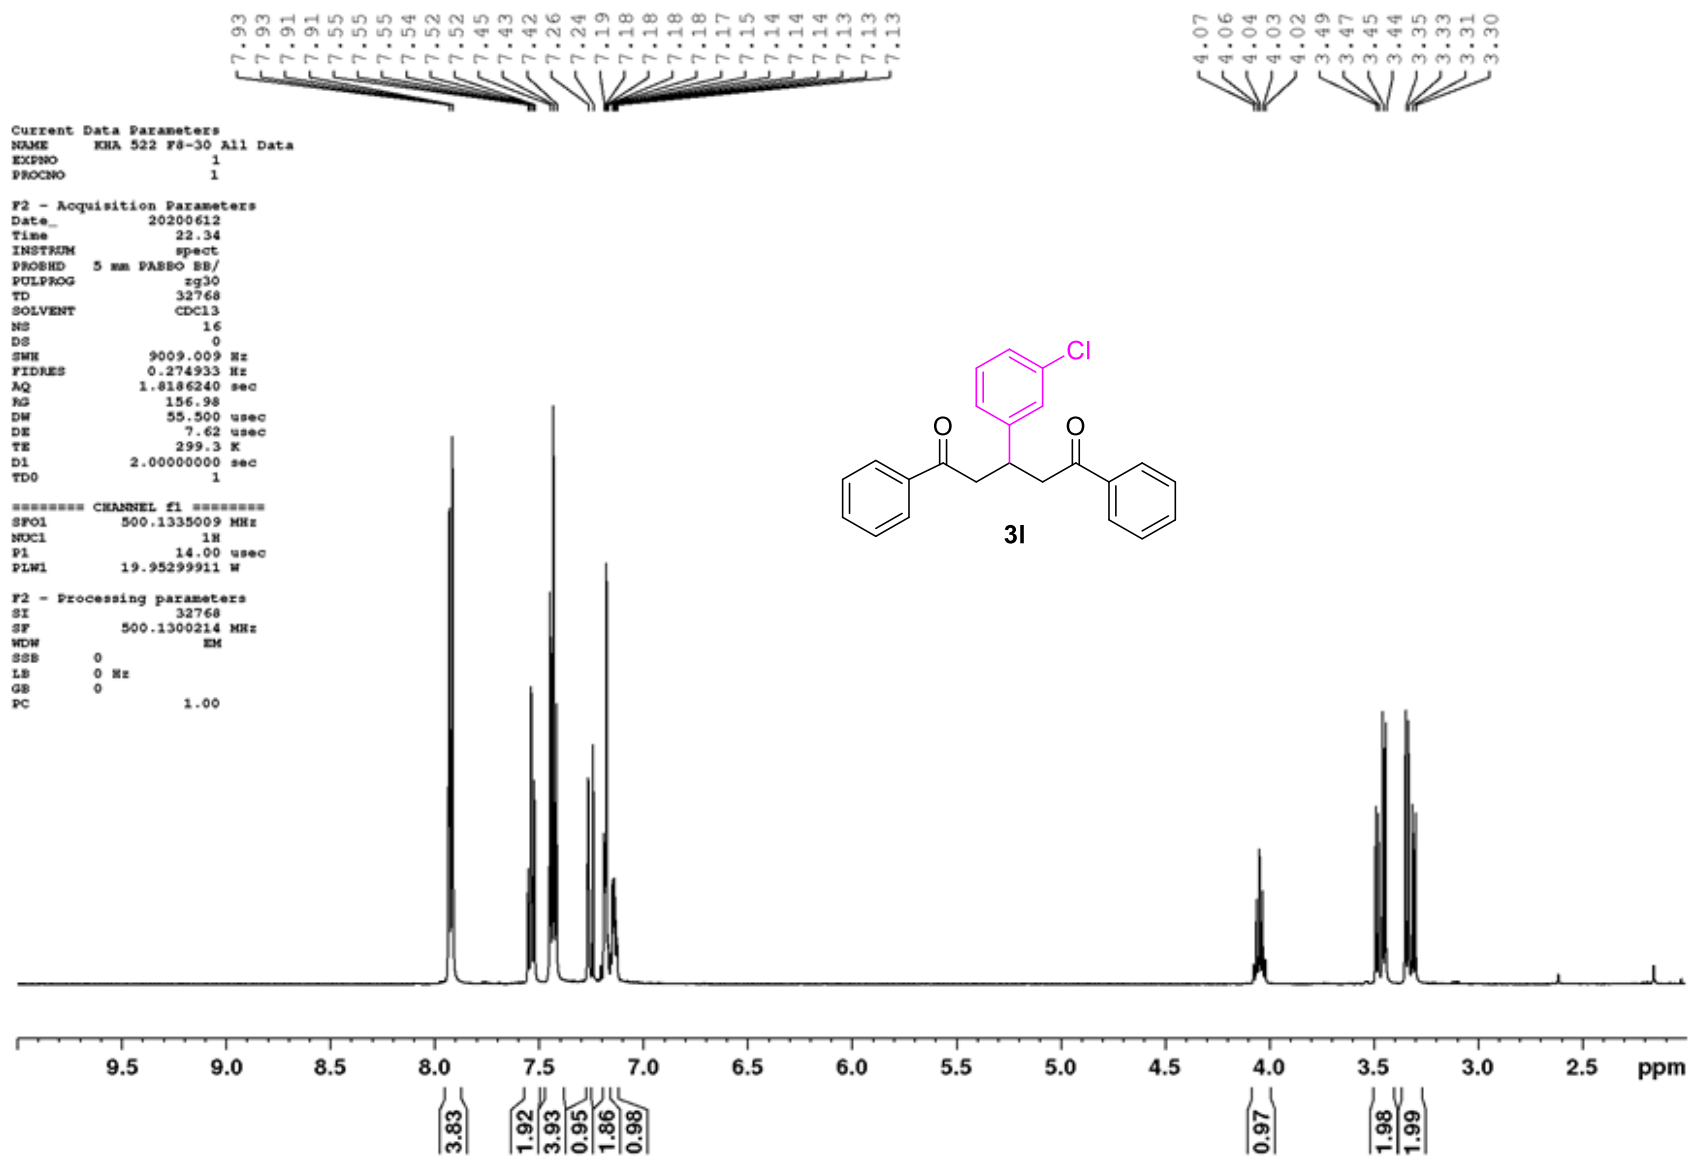

Figure S28.  $^1\text{H}$  NMR spectrum of compound **31** (500 MHz,  $\text{CDCl}_3$ , 25  $^\circ\text{C}$ )

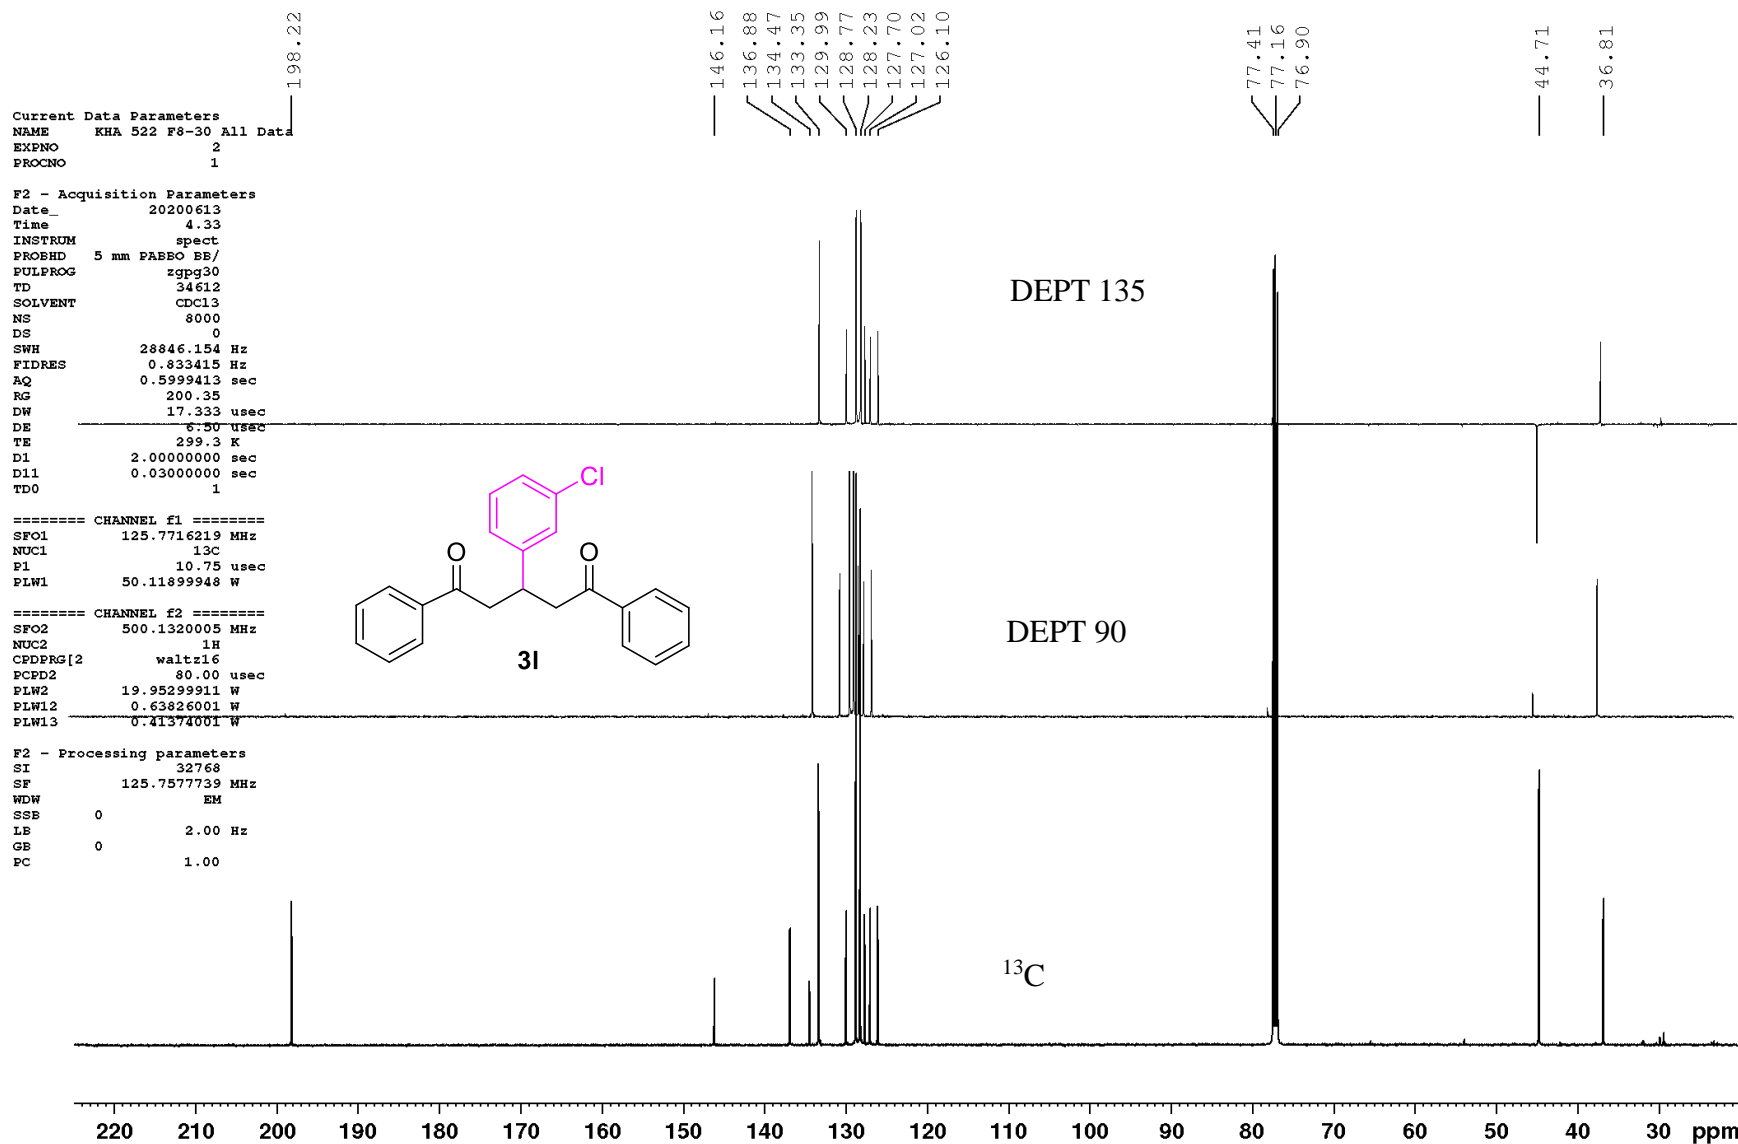

Figure S29. <sup>13</sup>C NMR spectrum of compound 31 (125 MHz, CDCl<sub>3</sub>, 25 °C)

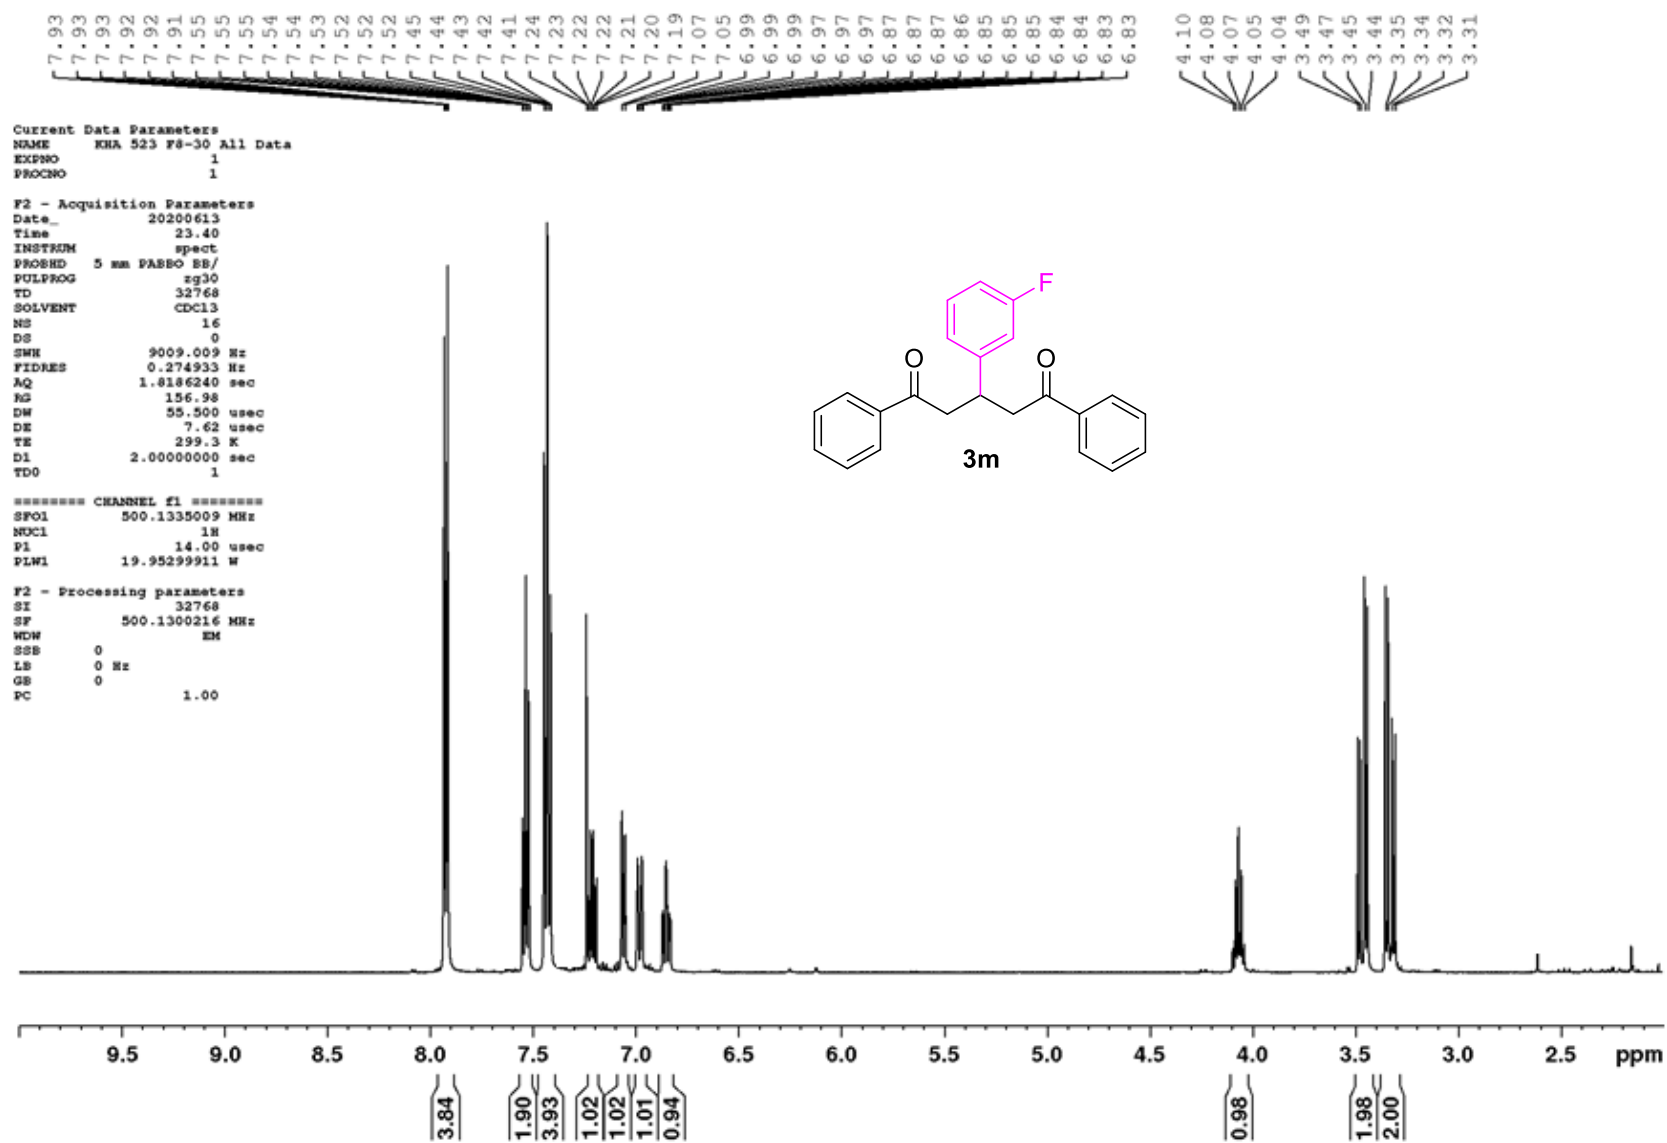

Figure S30. <sup>1</sup>H NMR spectrum of compound **3m** (500 MHz, CDCl<sub>3</sub>, 25 °C)



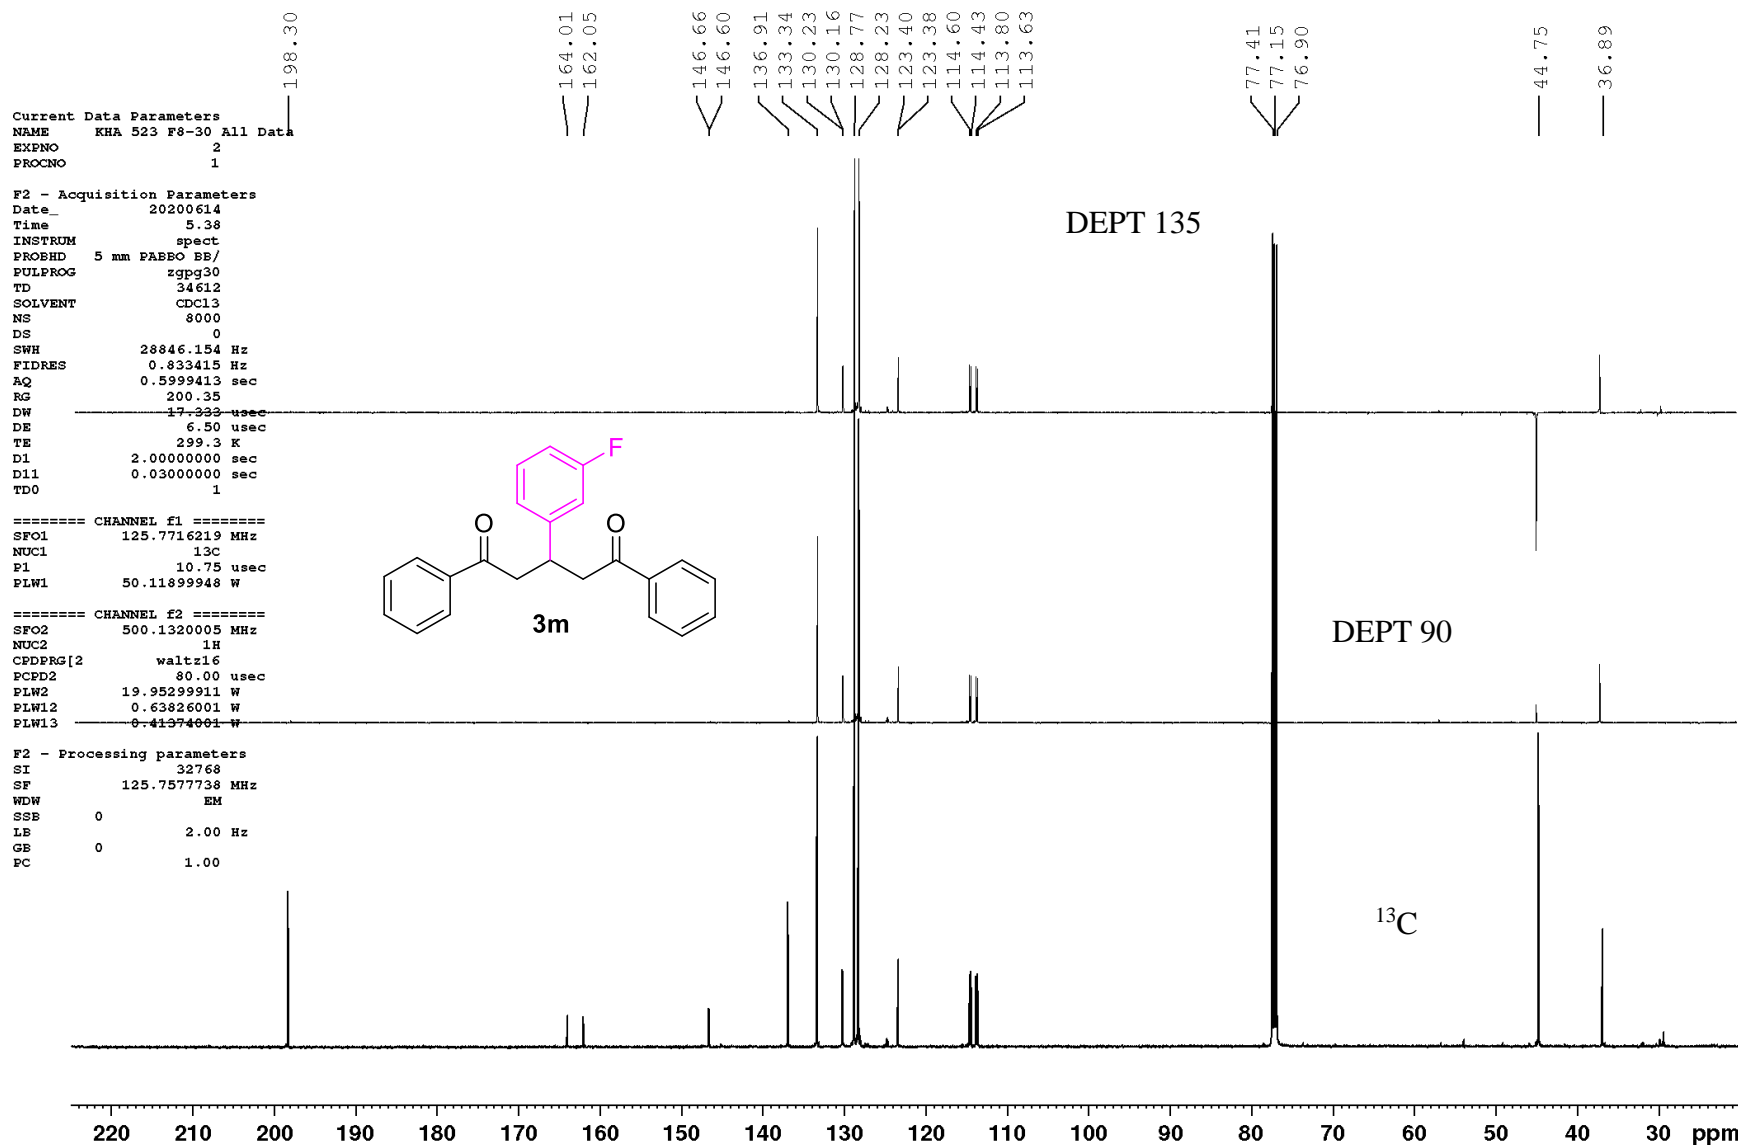

Figure S31. <sup>13</sup>C NMR spectrum of compound **3m** (125 MHz, CDCl<sub>3</sub>, 25 °C)

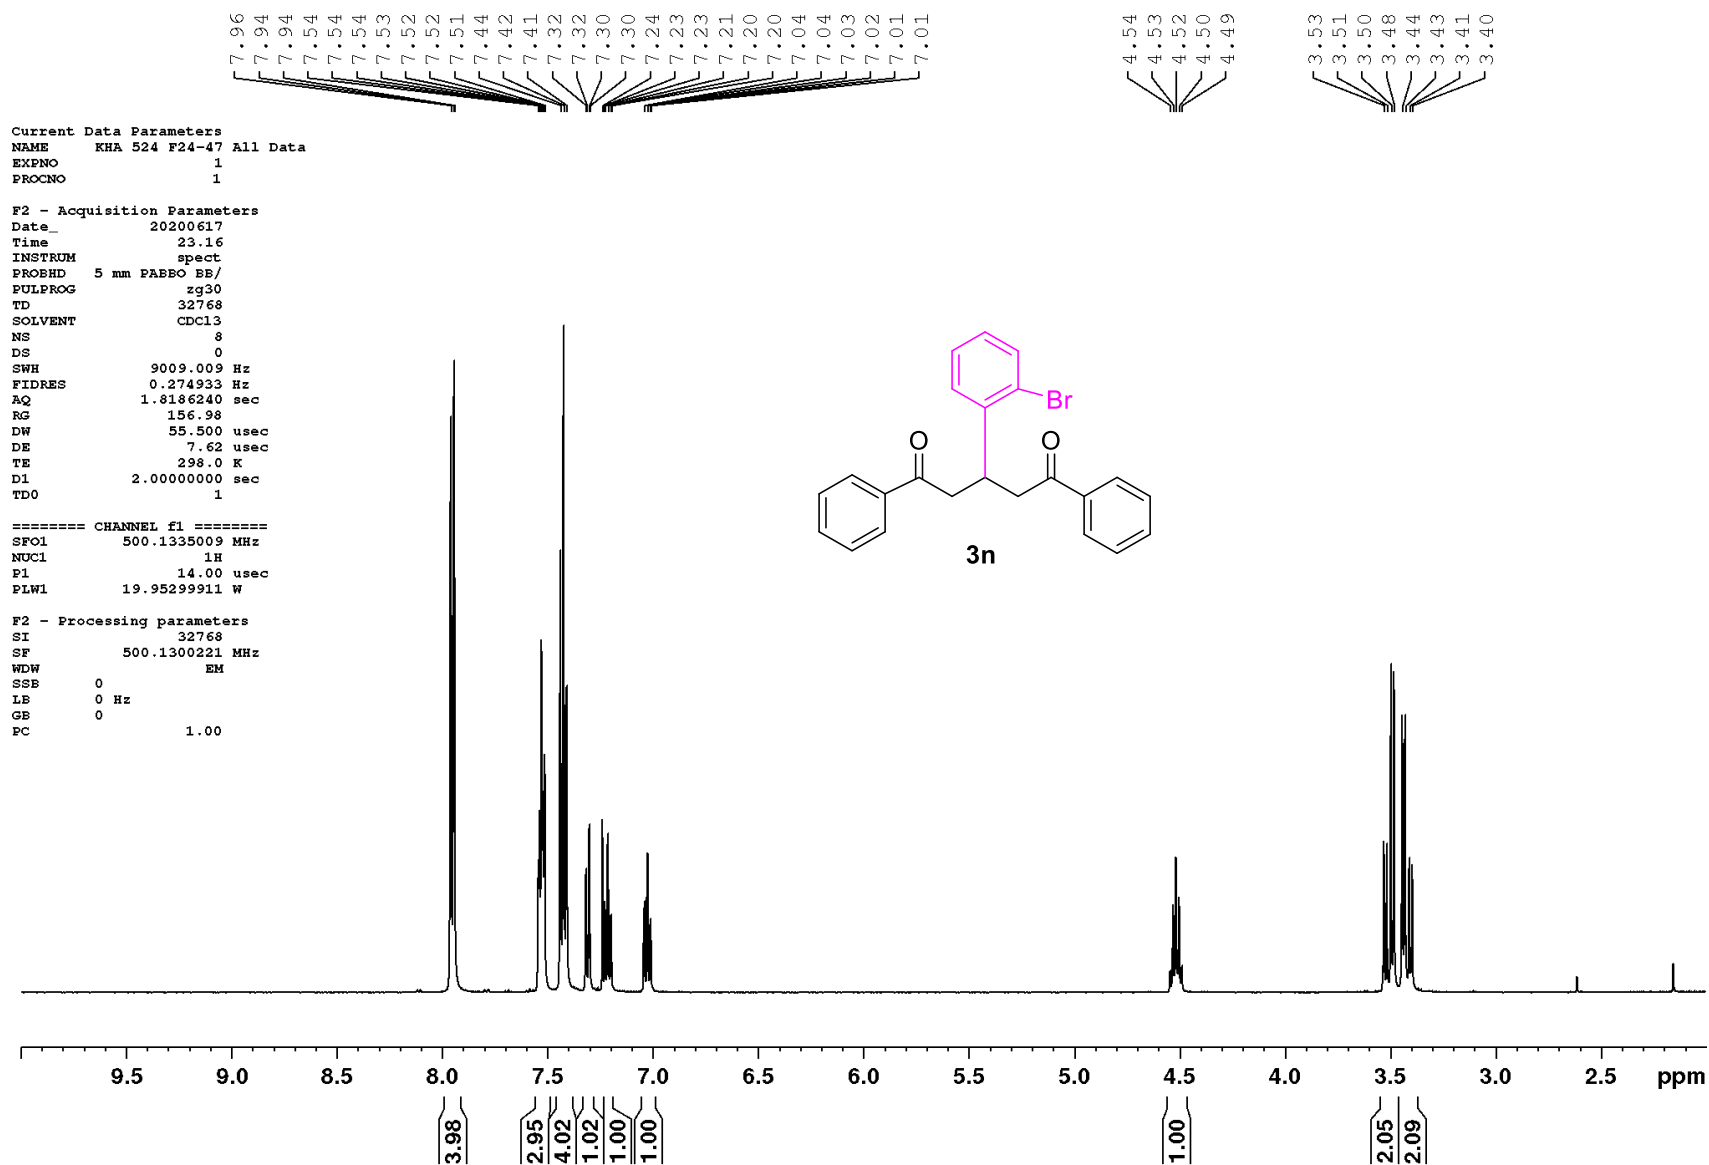

Figure S32.  $^1\text{H}$  NMR spectrum of compound **3n** (500 MHz,  $\text{CDCl}_3$ , 25  $^\circ\text{C}$ )

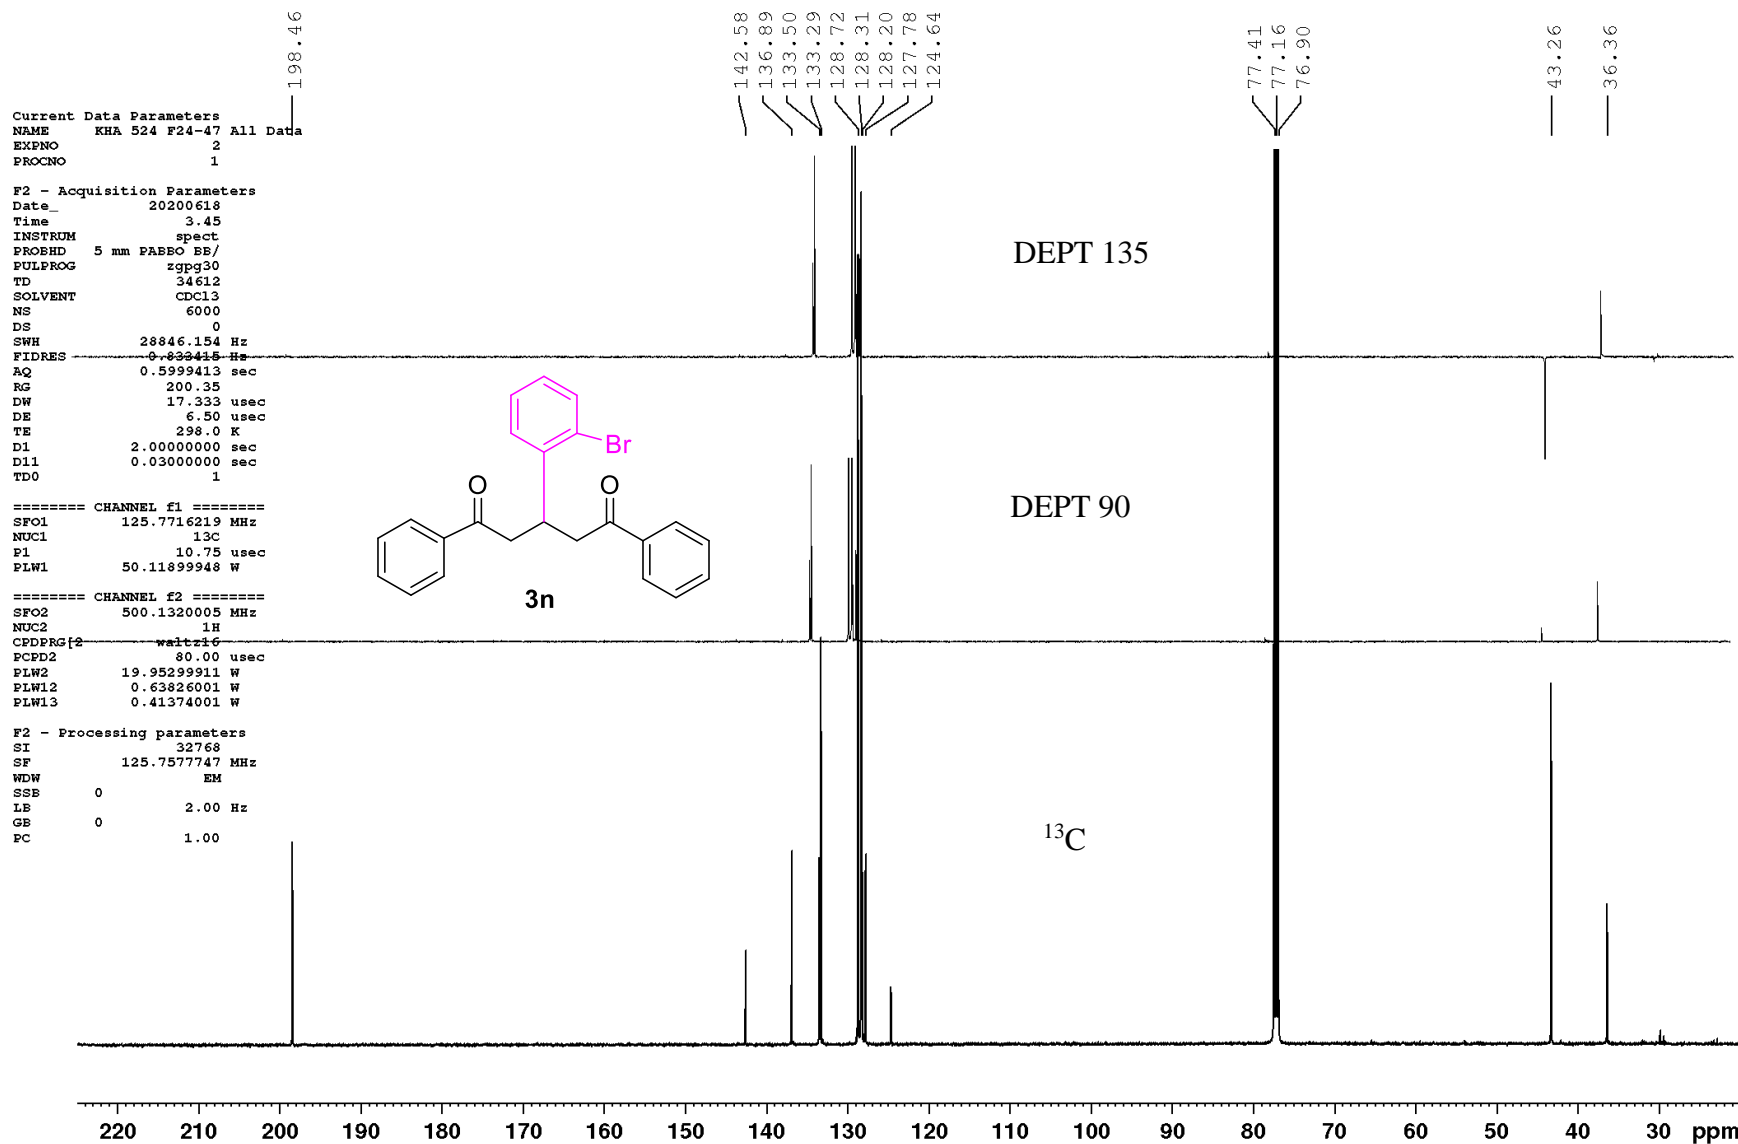

Figure S33. <sup>13</sup>C NMR spectrum of compound **3n** (125 MHz, CDCl<sub>3</sub>, 25 °C)

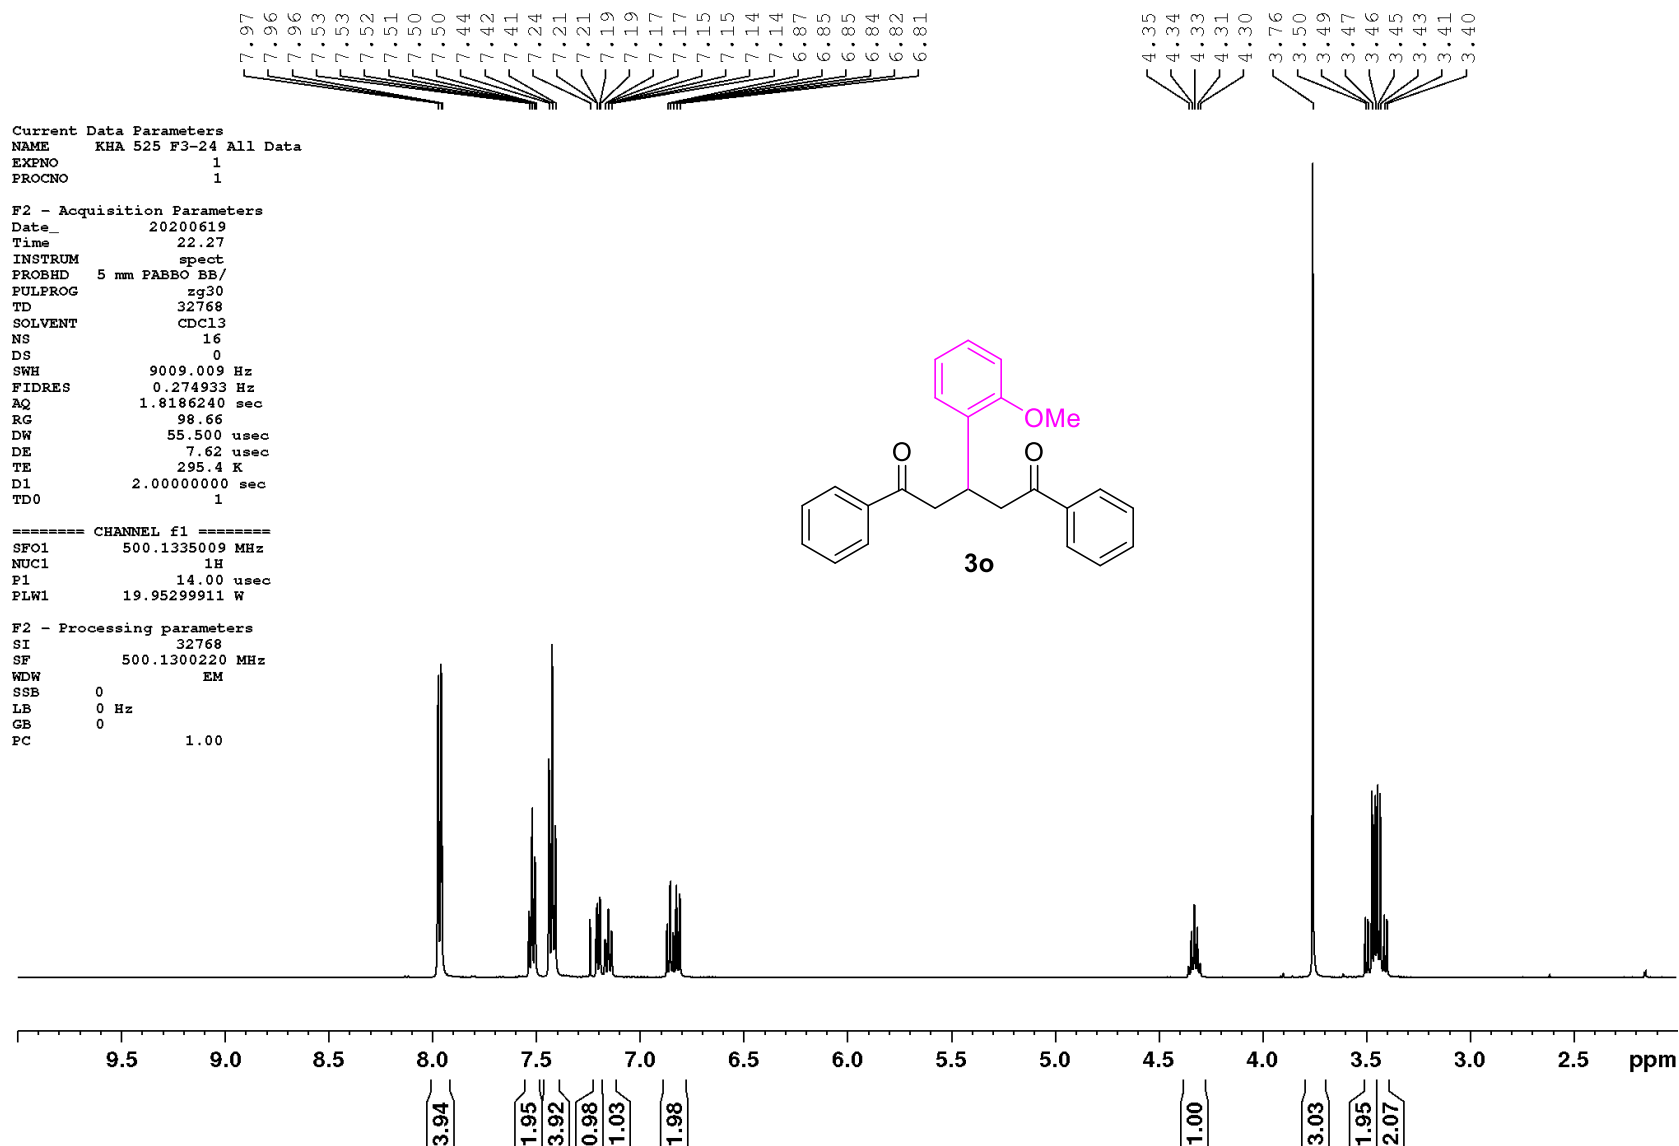

Figure S34.  $^1\text{H}$  NMR spectrum of compound **3o** (500 MHz,  $\text{CDCl}_3$ , 25  $^\circ\text{C}$ )

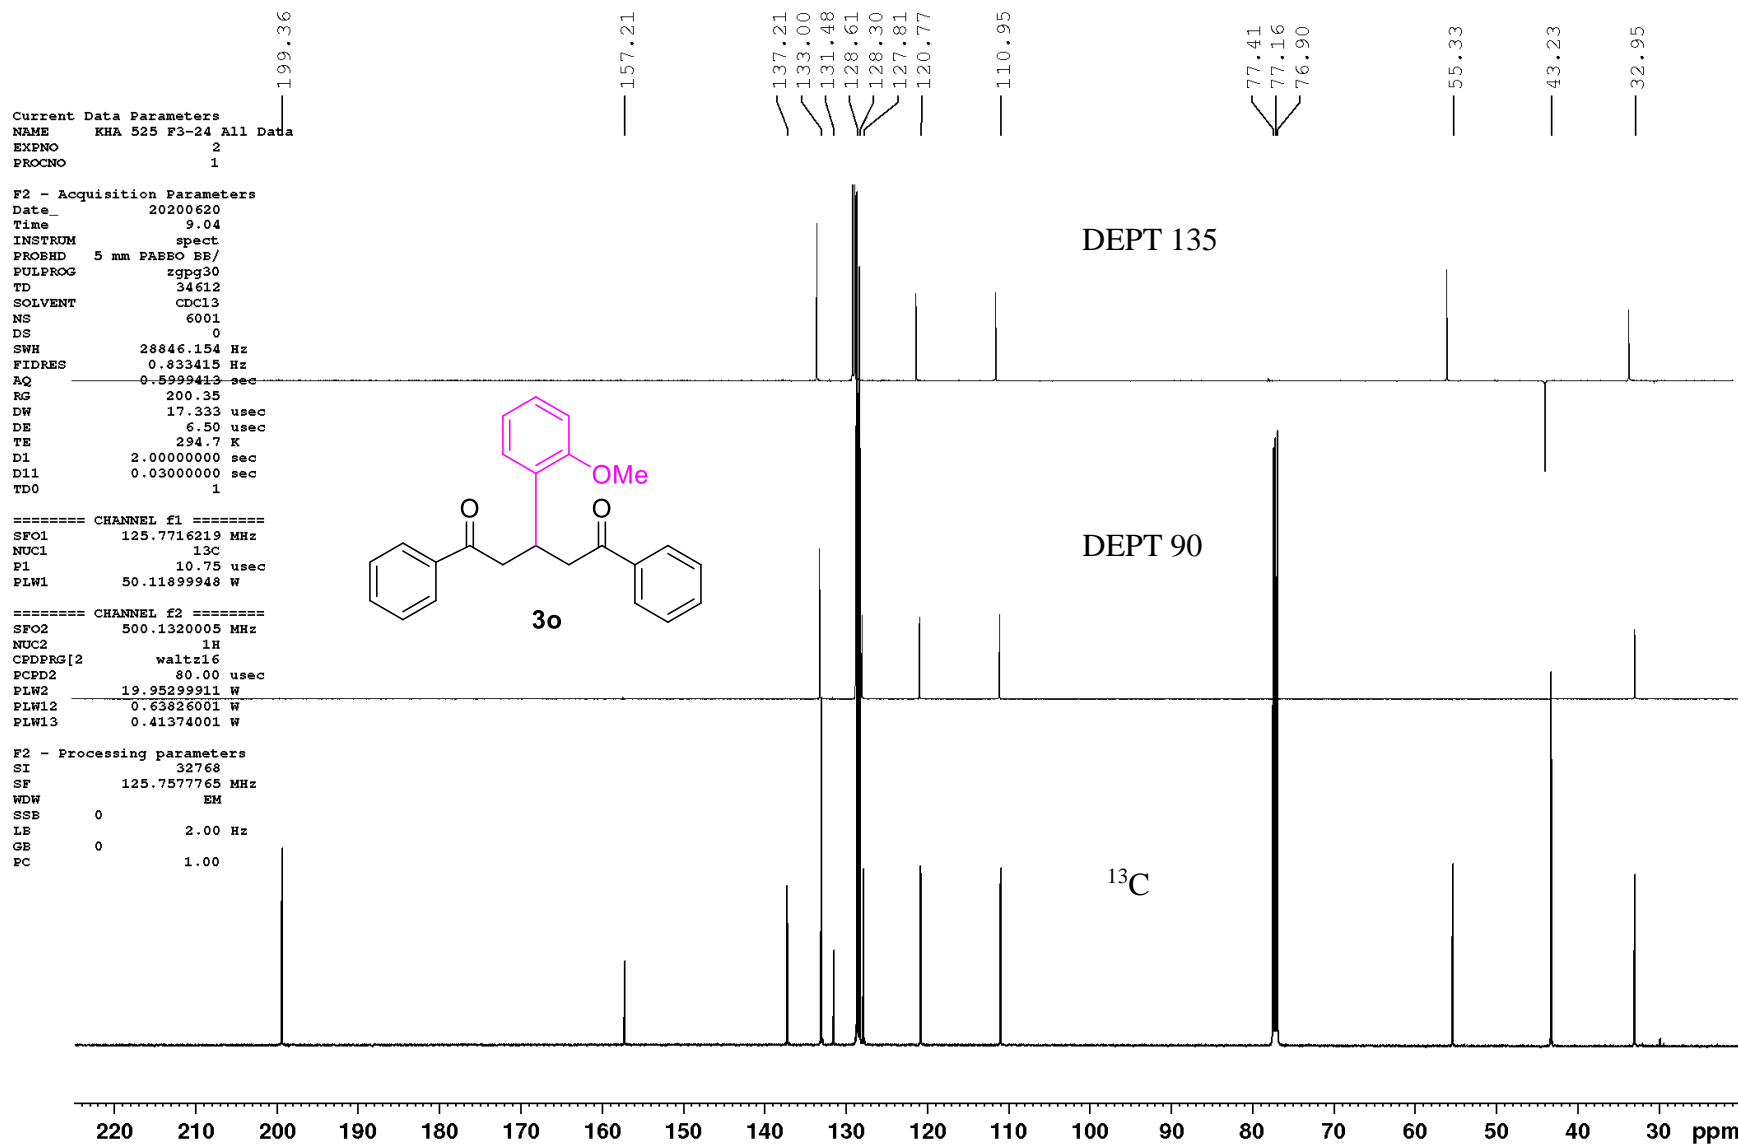

Figure S35. <sup>13</sup>C NMR spectrum of compound **3o** (125 MHz, CDCl<sub>3</sub>, 25 °C)

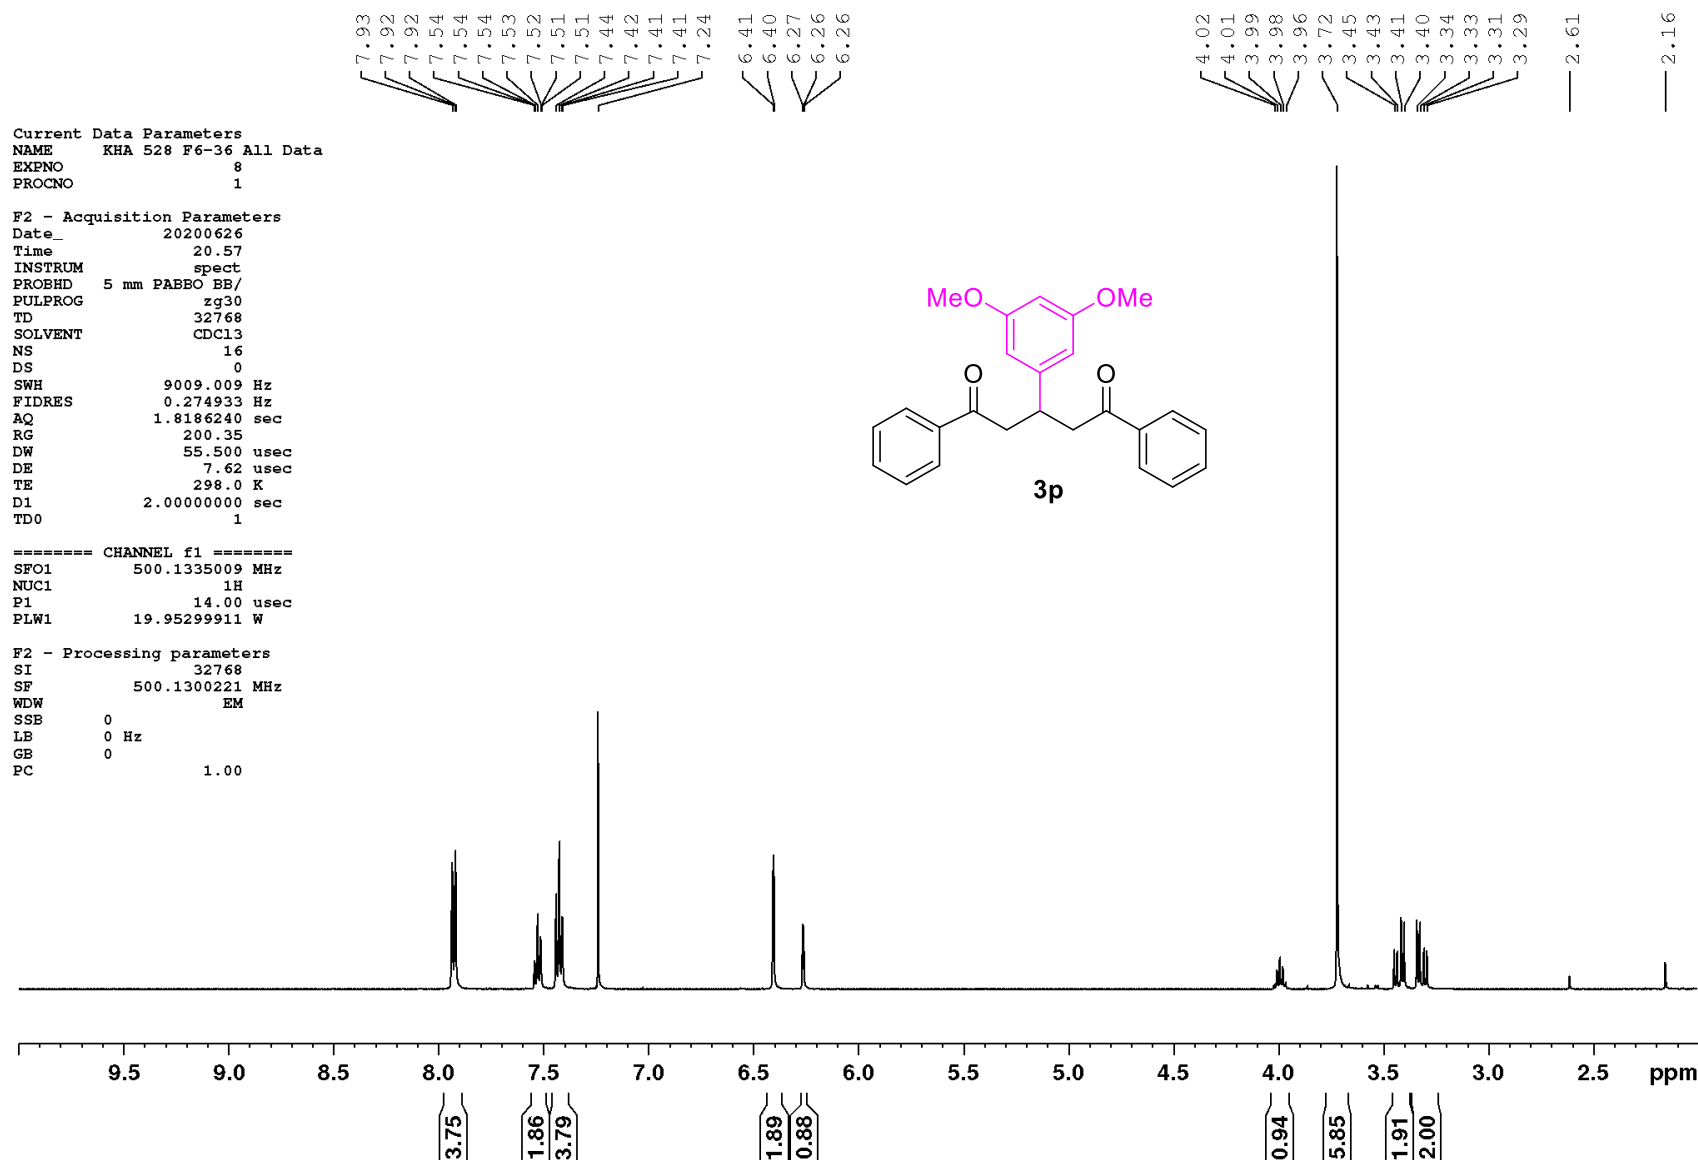

Figure S36. <sup>1</sup>H NMR spectrum of compound **3p** (500 MHz, CDCl<sub>3</sub>, 25 °C)

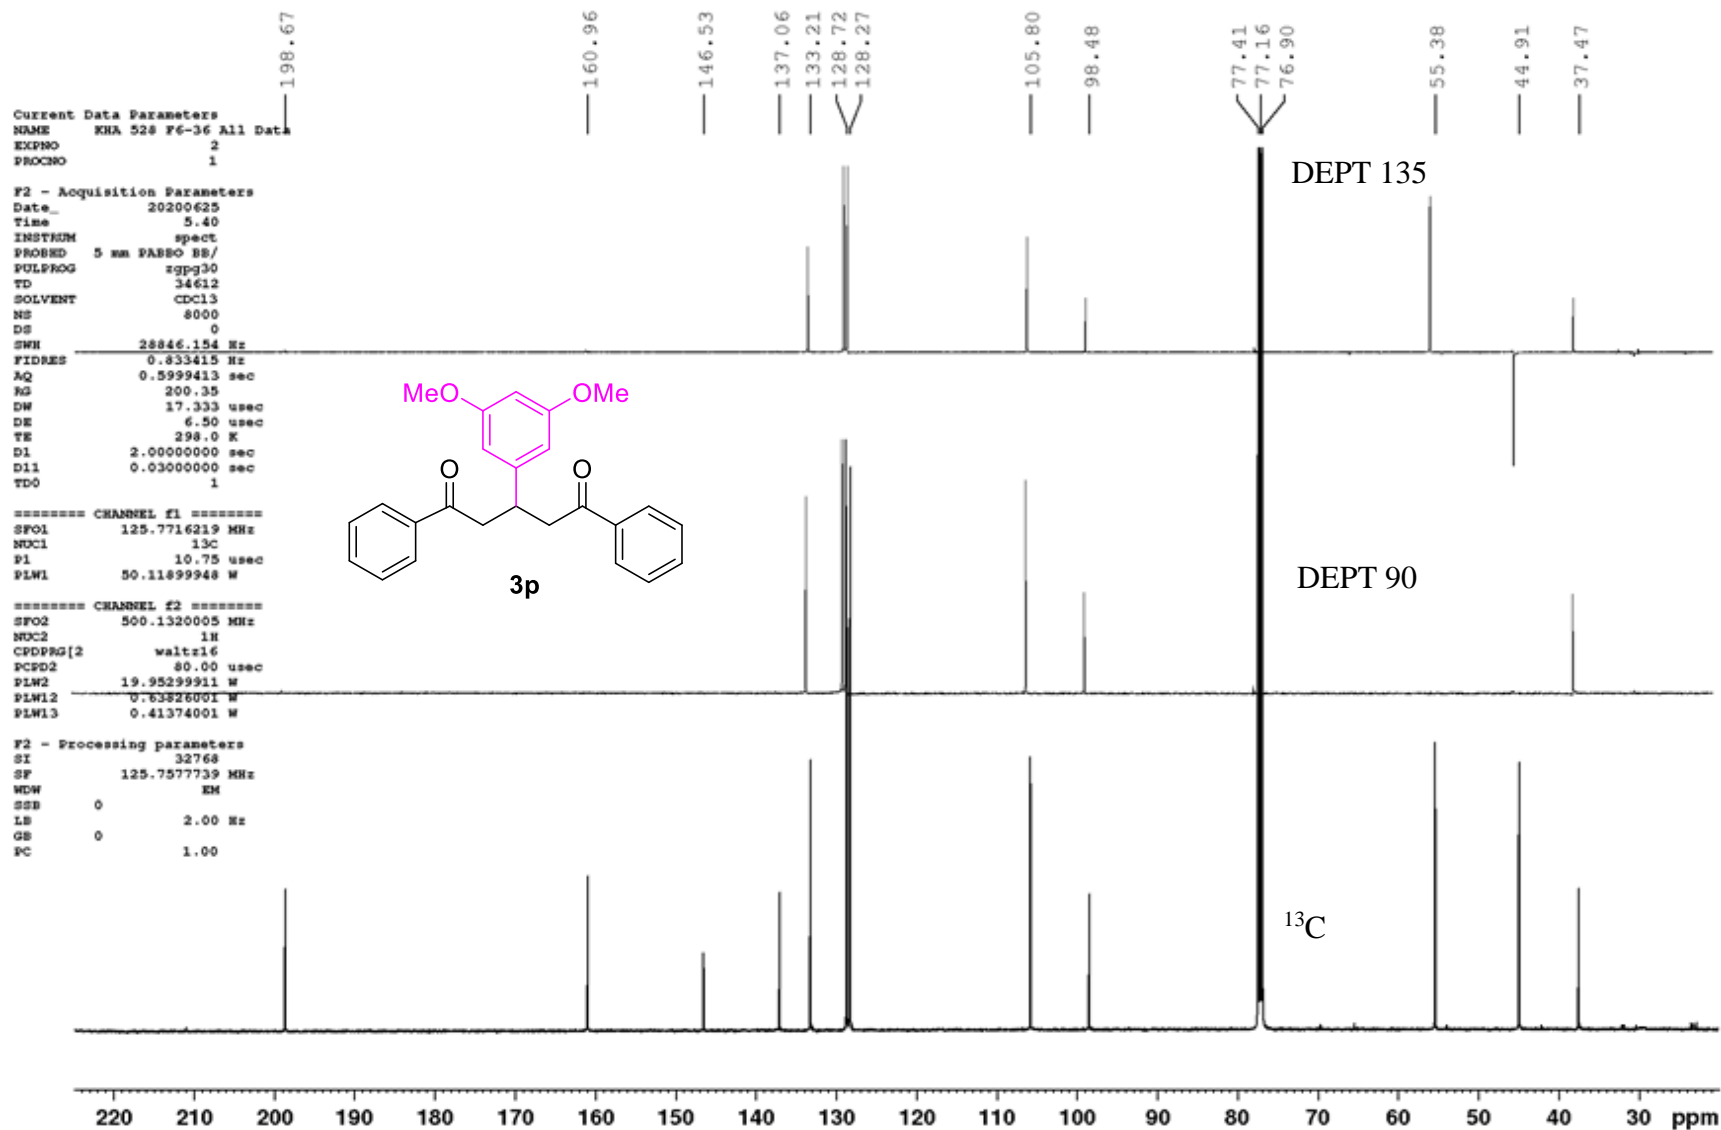

Figure S37.  $^{13}\text{C}$  NMR spectrum of compound **3p** (125 MHz,  $\text{CDCl}_3$ , 25  $^\circ\text{C}$ )

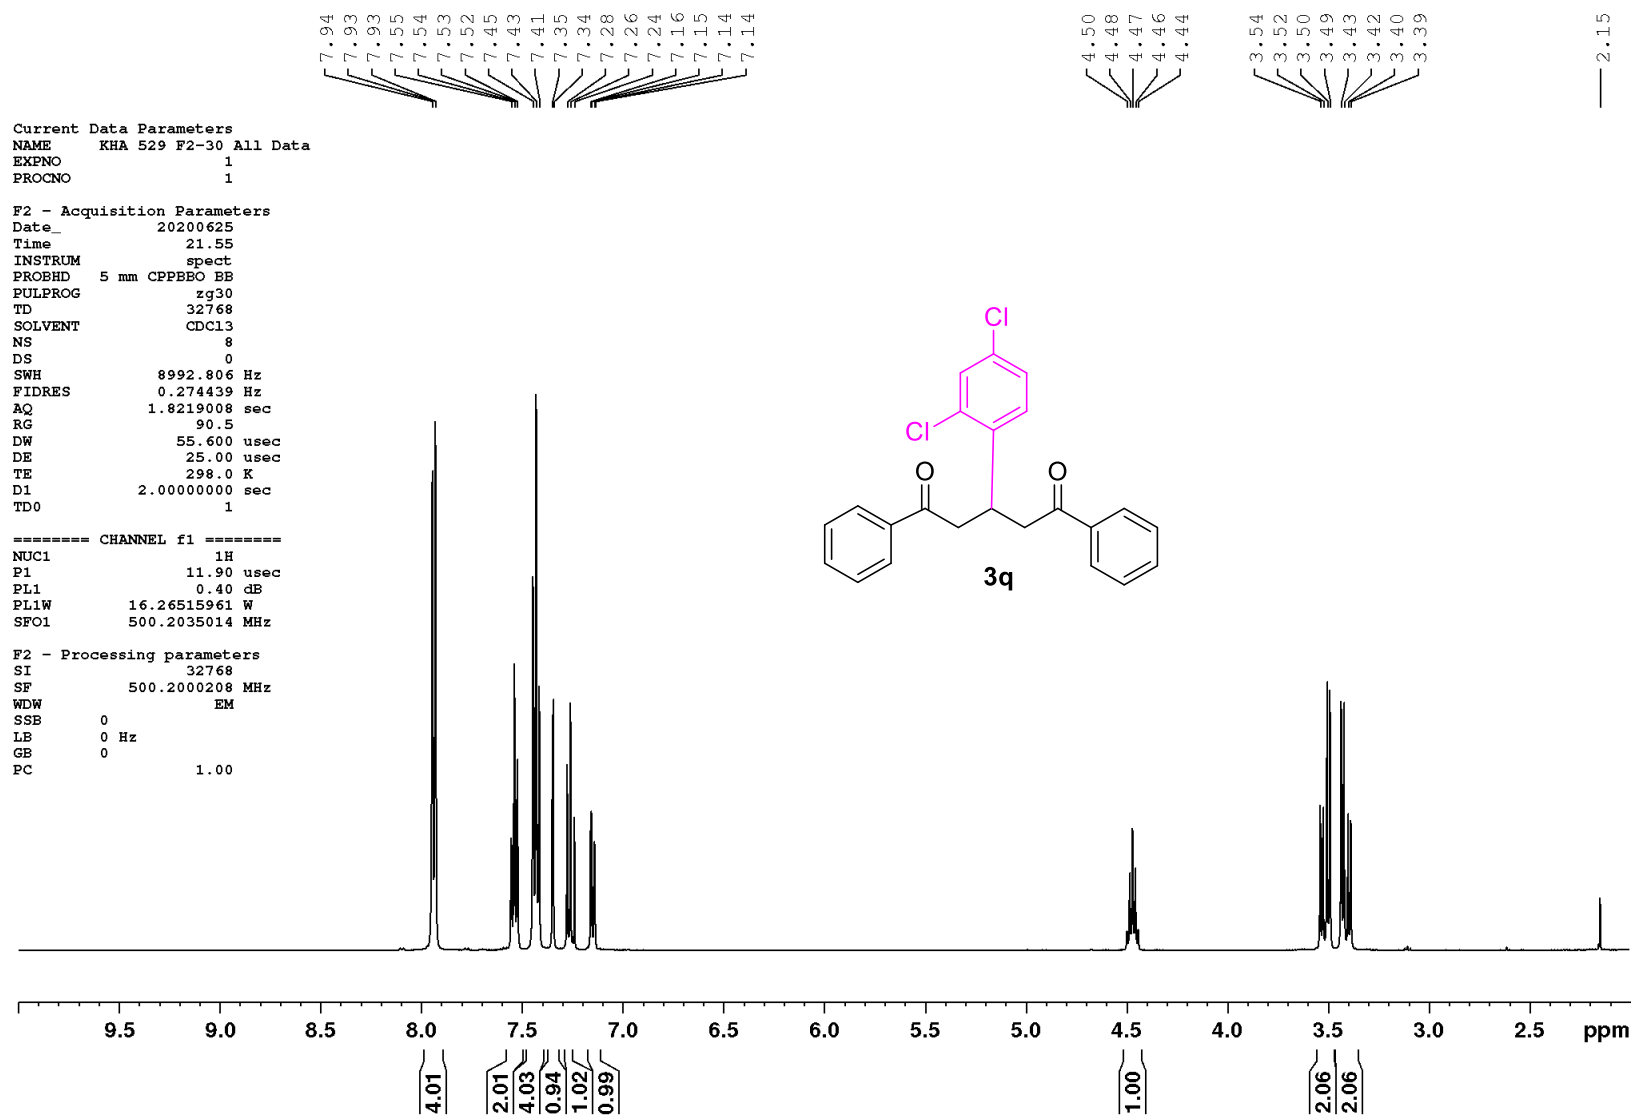

Figure S38.  $^1\text{H}$  NMR spectrum of compound **3q** (500 MHz,  $\text{CDCl}_3$ , 25  $^\circ\text{C}$ )



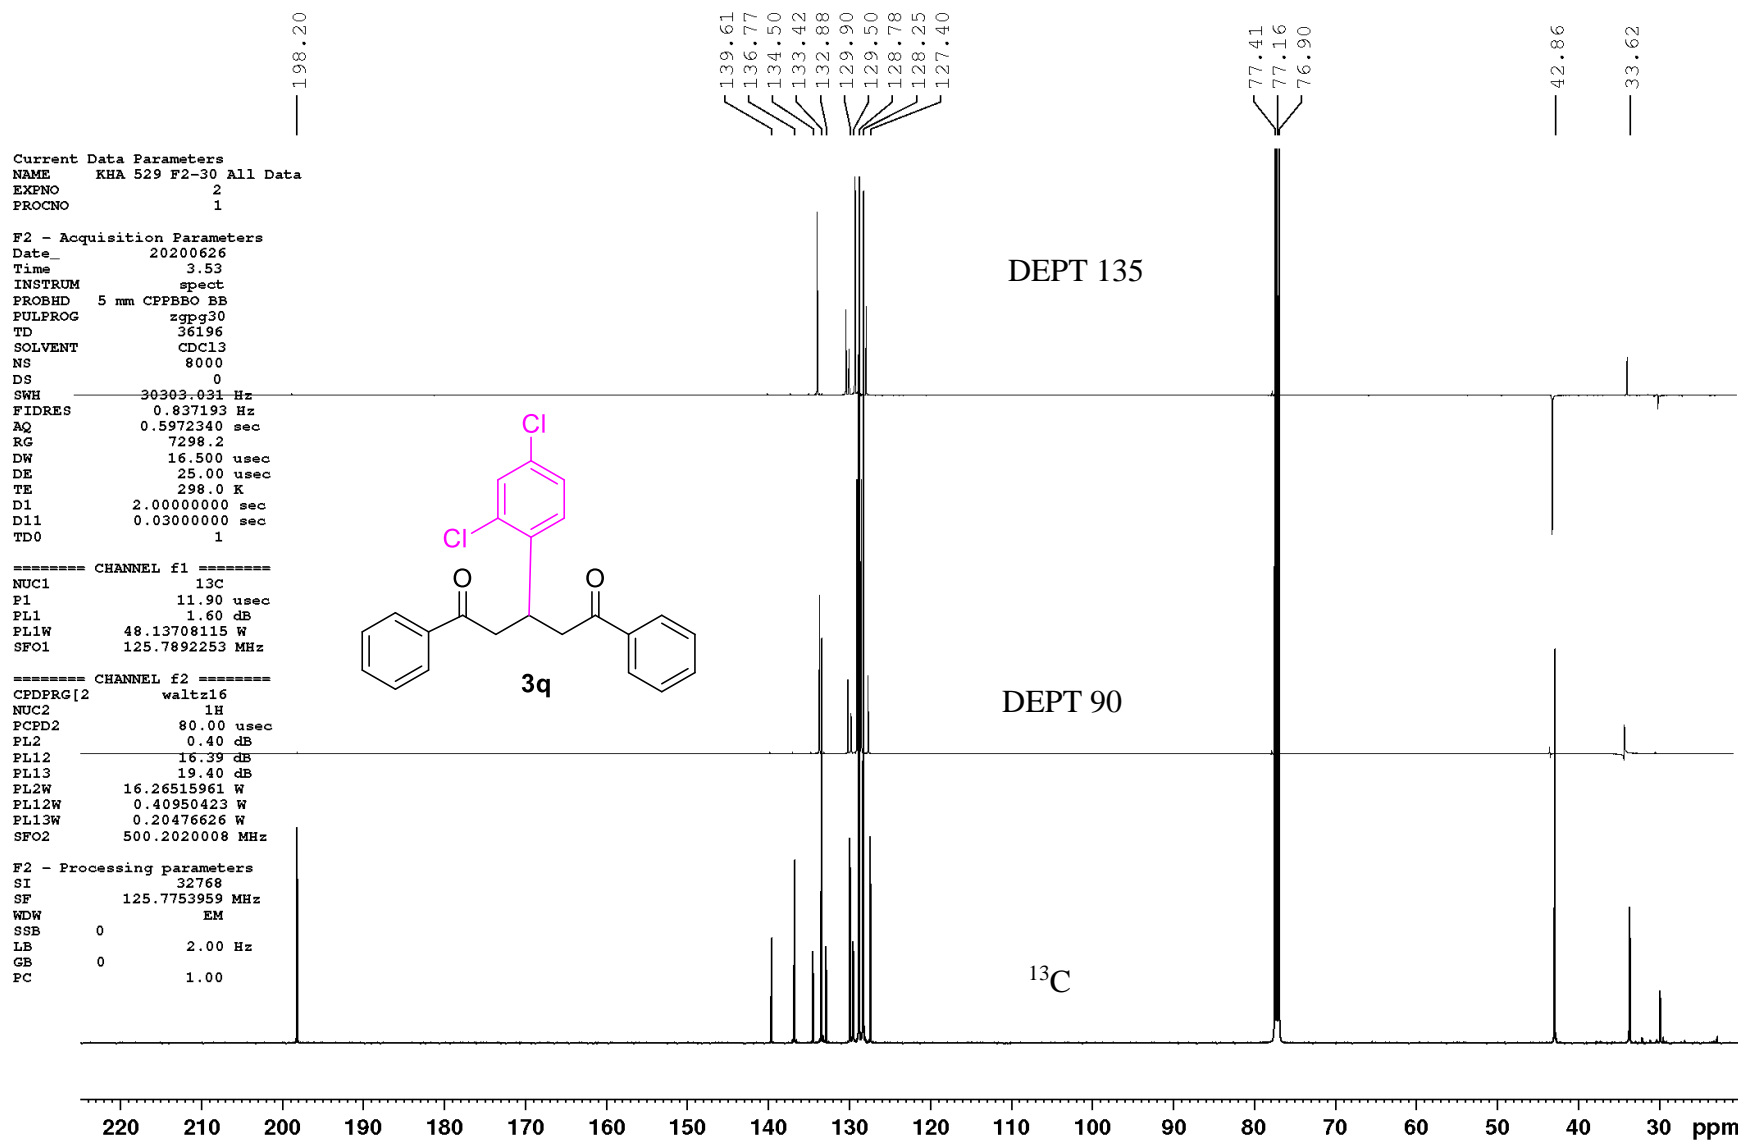

Figure S39. <sup>13</sup>C NMR spectrum of compound **3q** (125 MHz, CDCl<sub>3</sub>, 25 °C)

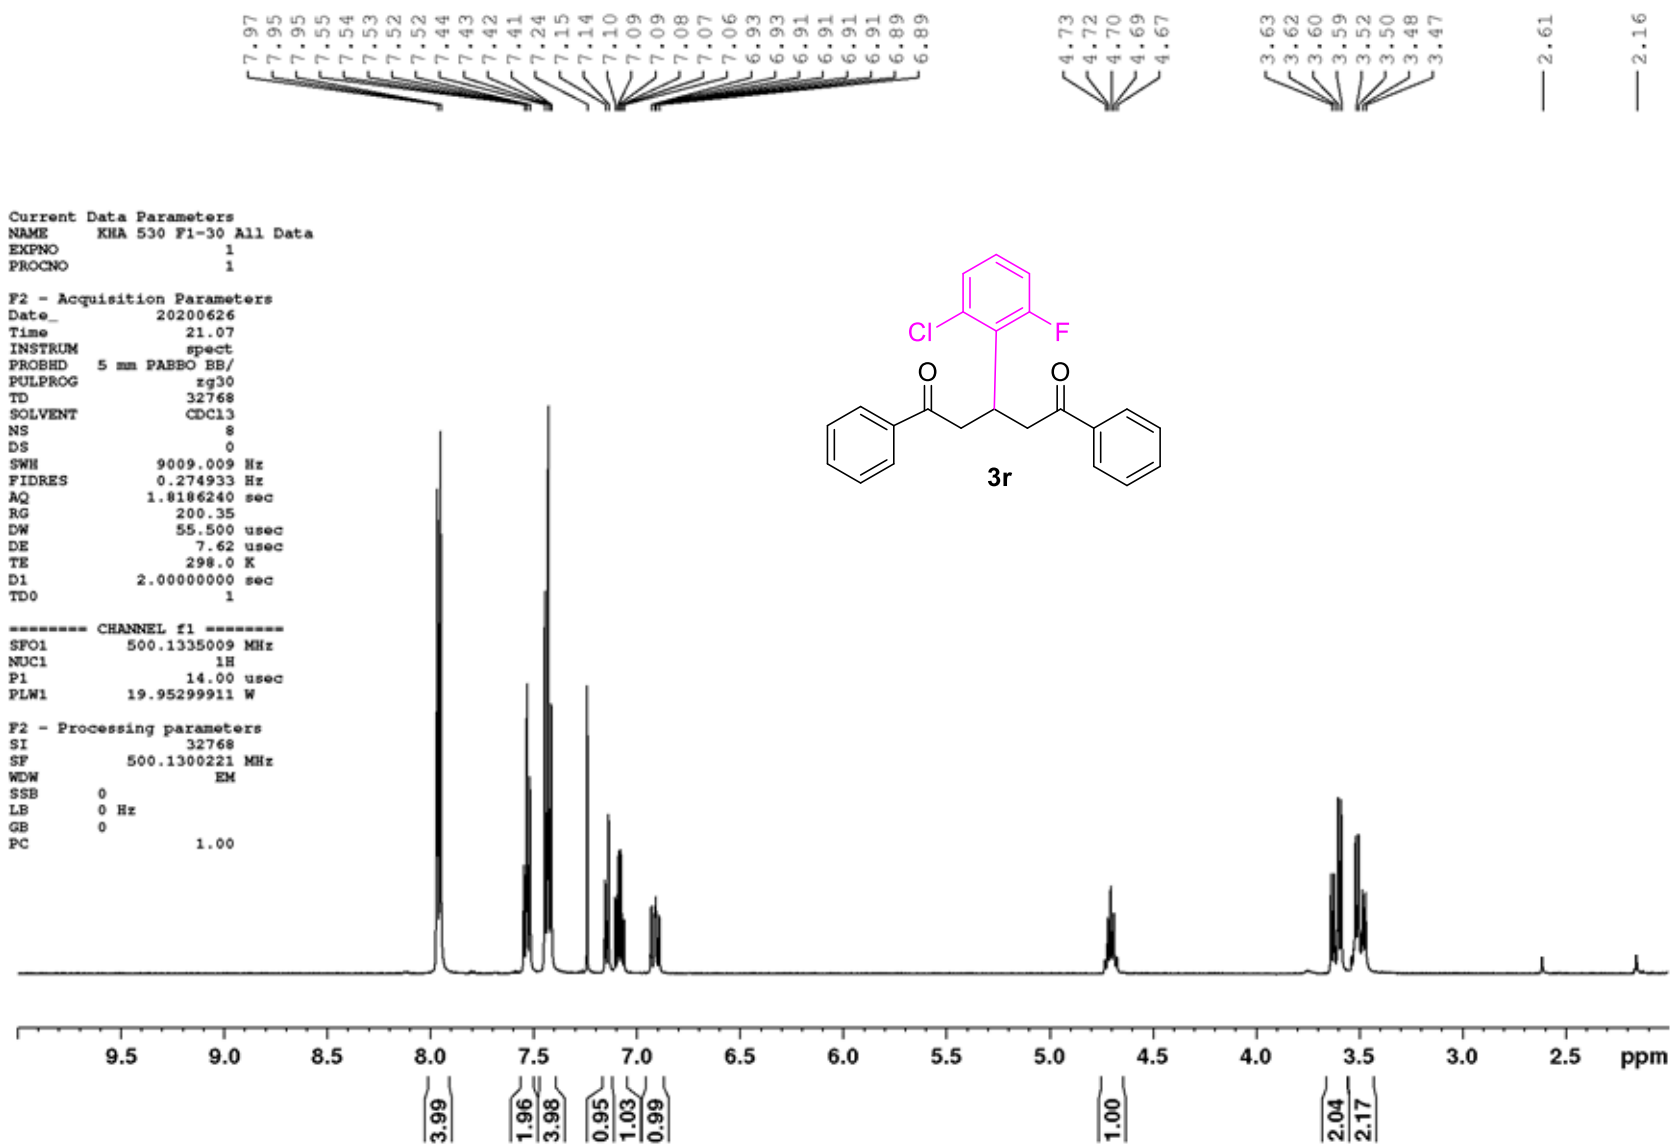

Figure S40. <sup>1</sup>H NMR spectrum of compound **3r** (500 MHz, CDCl<sub>3</sub>, 25 °C)

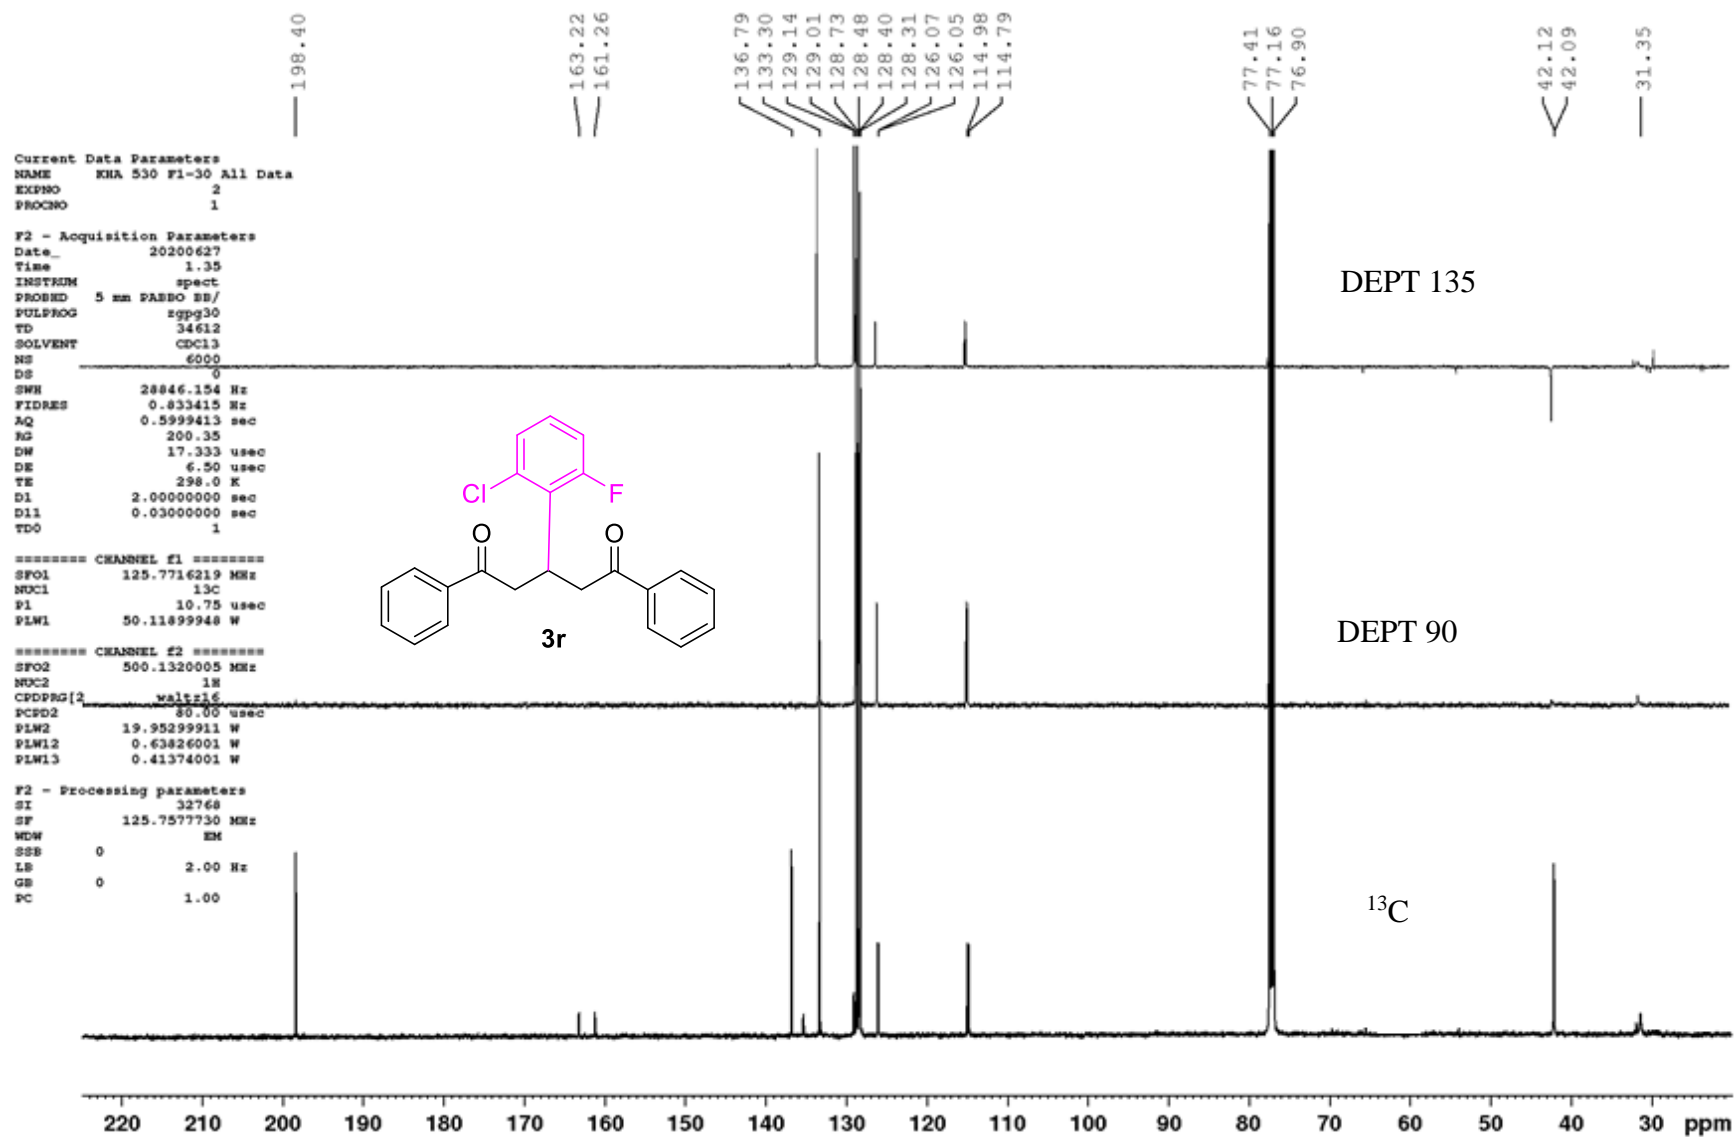

Figure S41. <sup>13</sup>C NMR spectrum of compound **3r** (125 MHz, CDCl<sub>3</sub>, 25 °C)

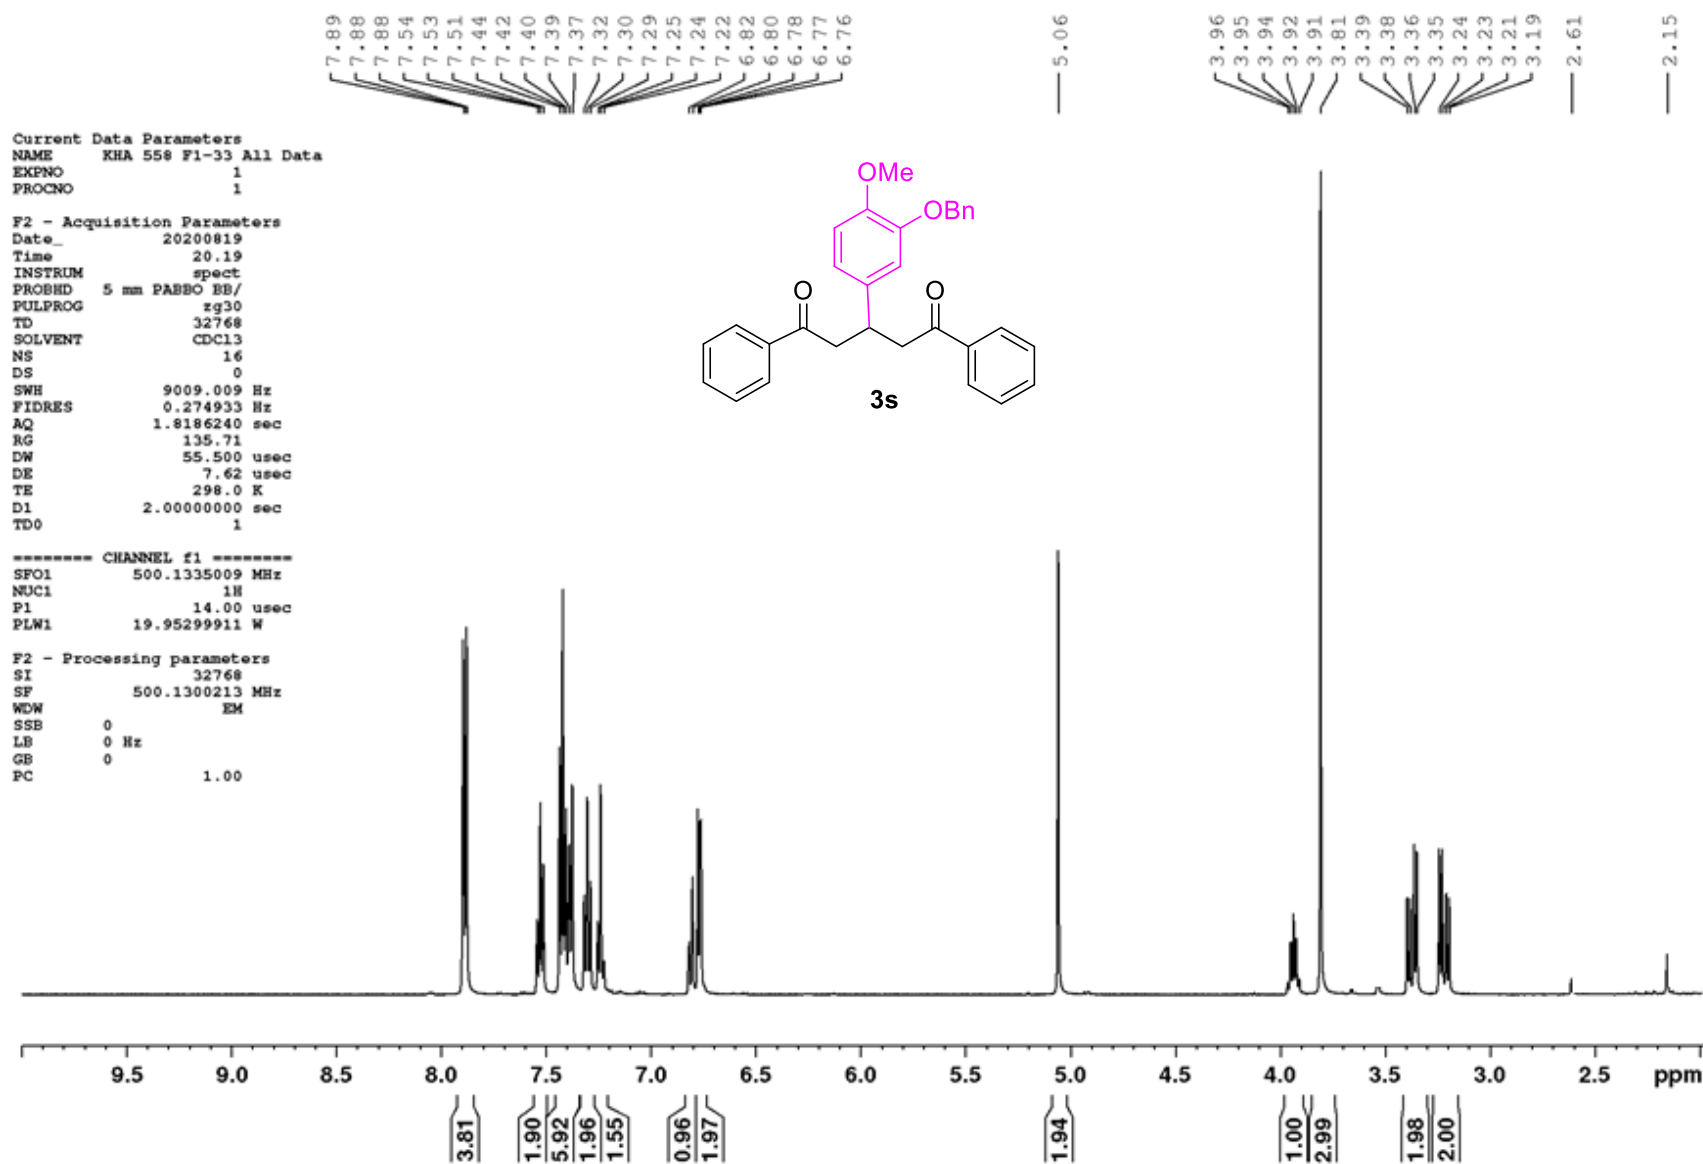

Figure S42.  $^1\text{H}$  NMR spectrum of compound **3s** (500 MHz,  $\text{CDCl}_3$ , 25  $^\circ\text{C}$ )

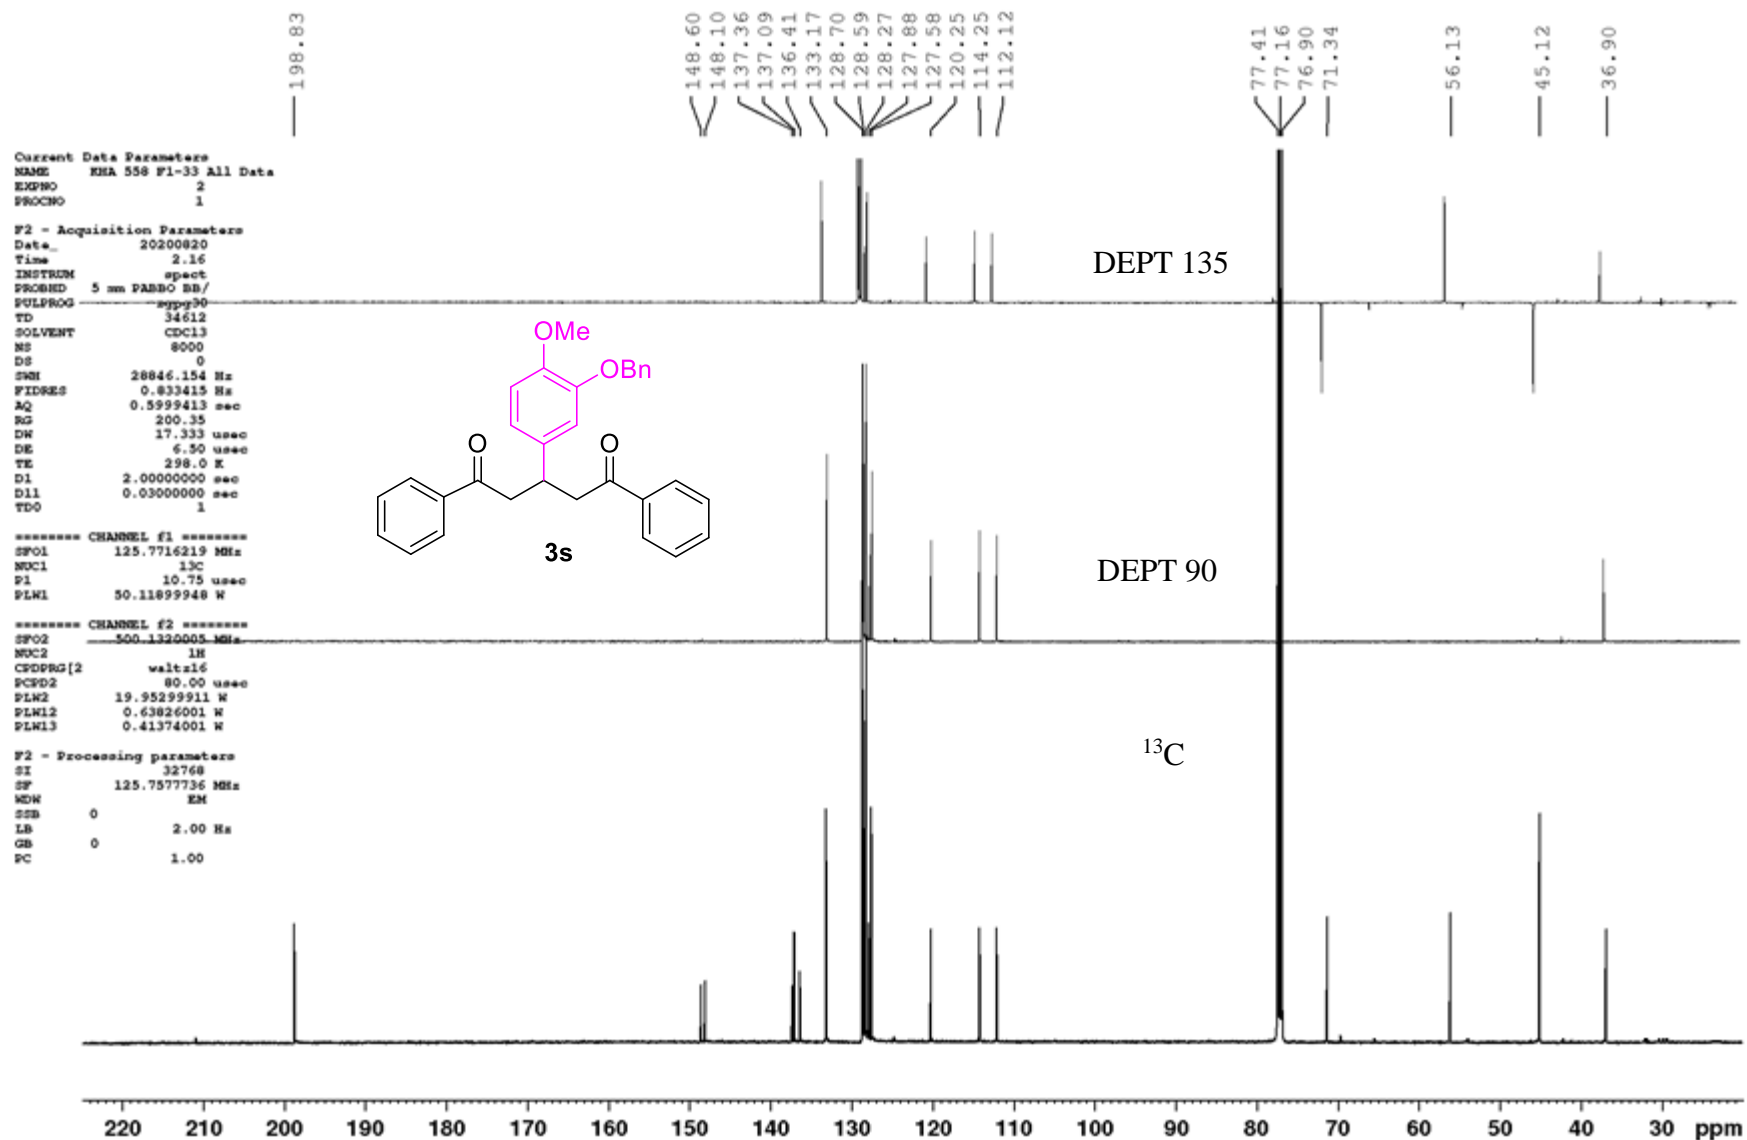

Figure S43. <sup>13</sup>C NMR spectrum of compound **3s** (125 MHz, CDCl<sub>3</sub>, 25 °C)

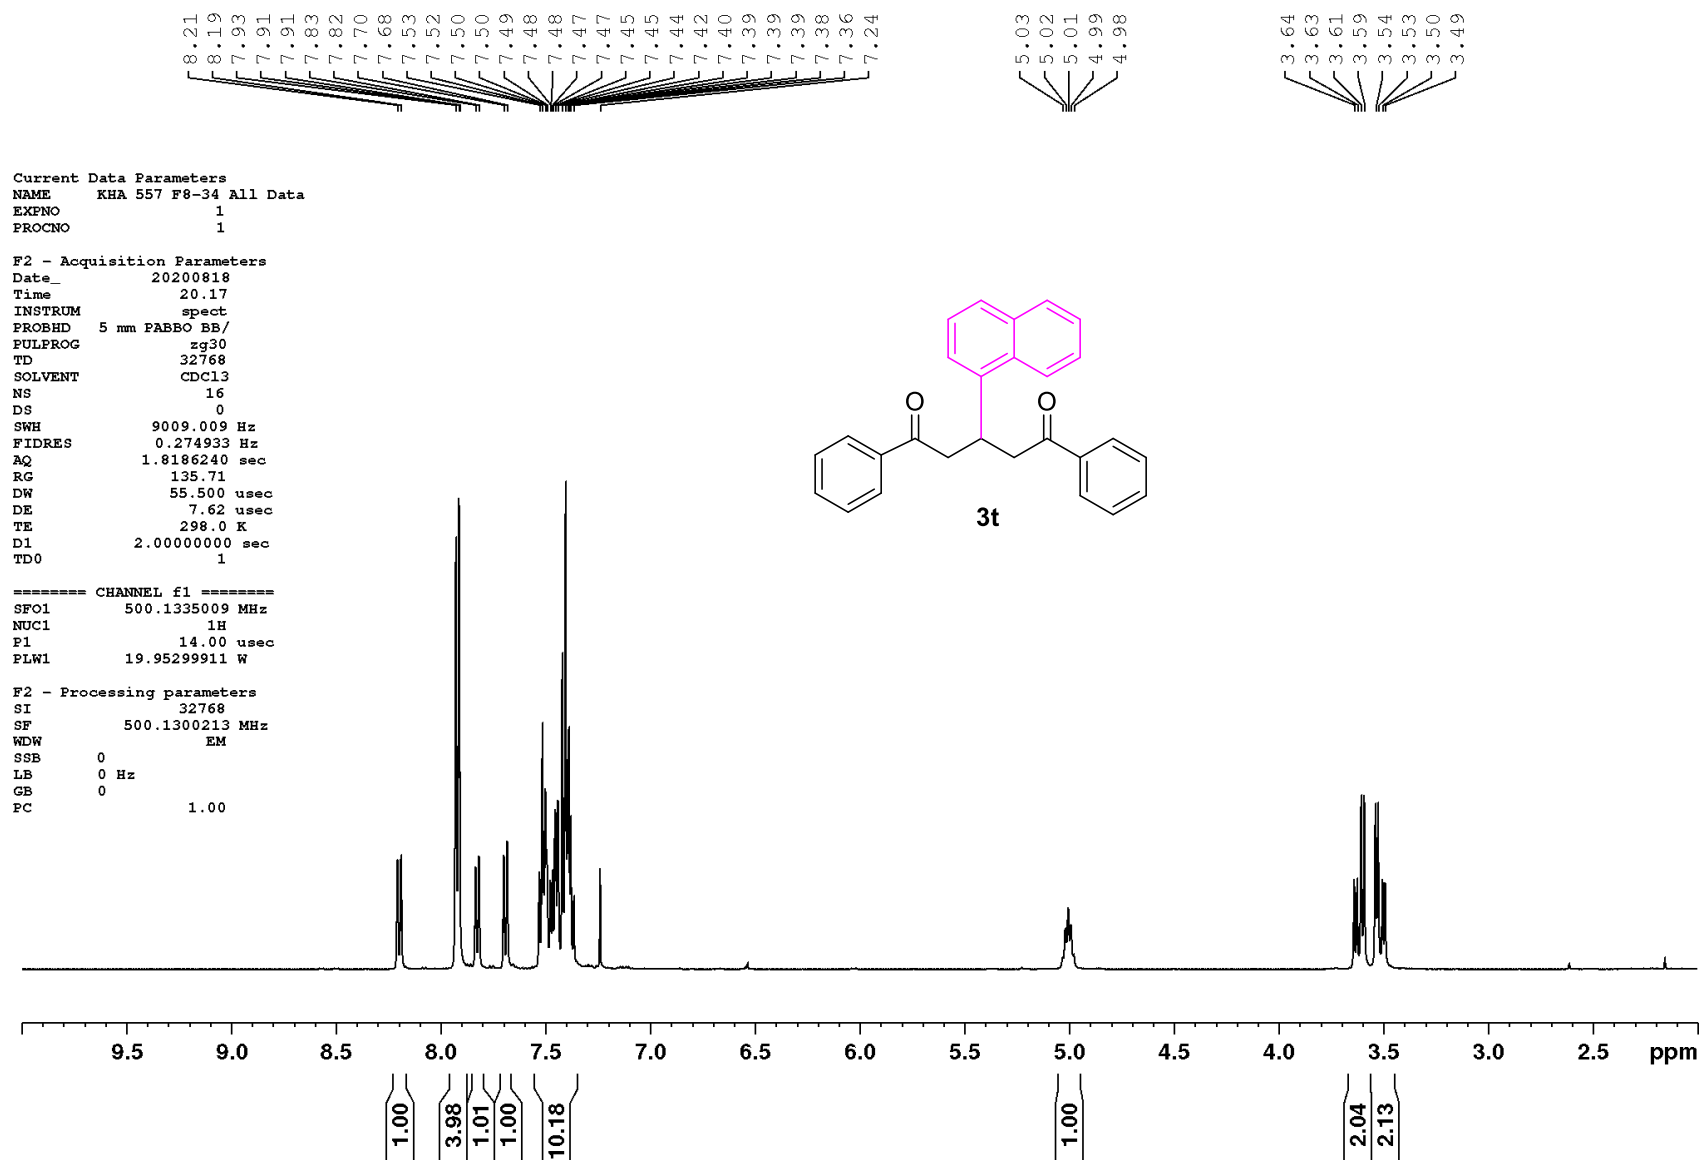

Figure S44. <sup>1</sup>H NMR spectrum of compound **3t** (500 MHz, CDCl<sub>3</sub>, 25 °C)

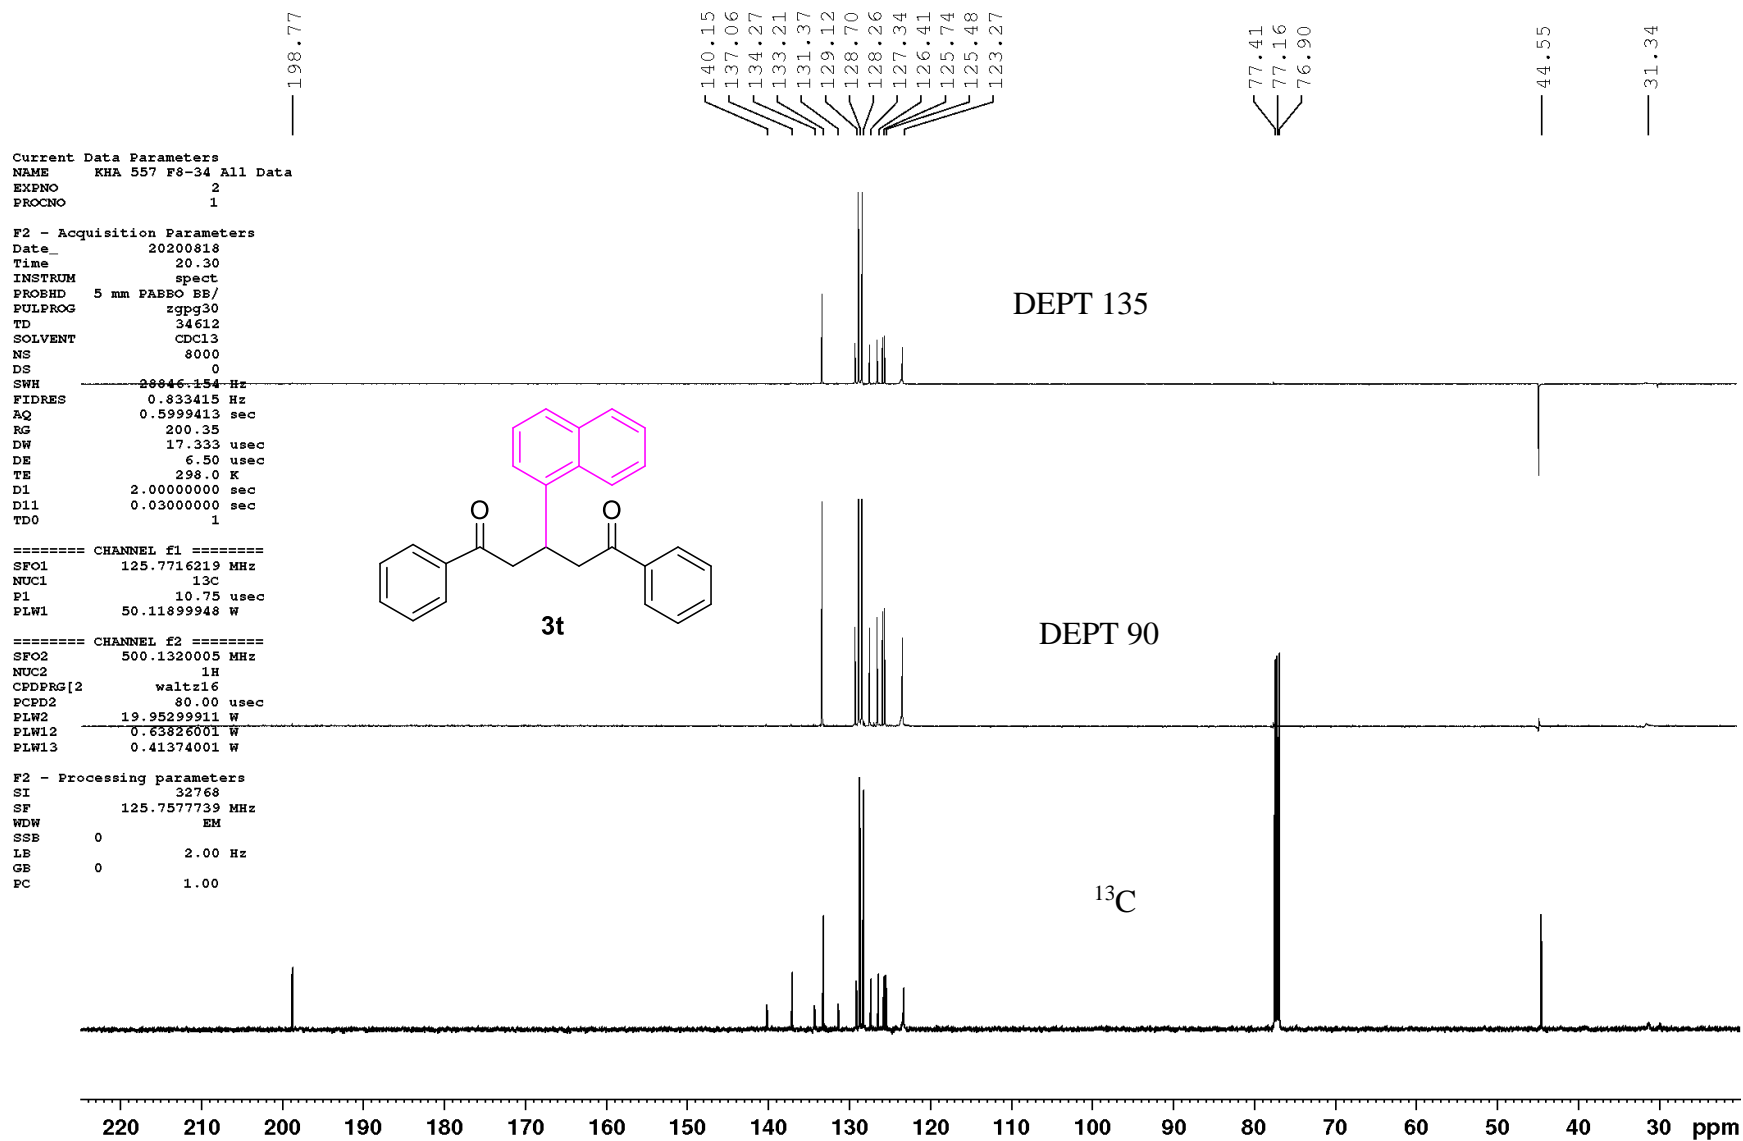

Figure S45. <sup>13</sup>C NMR spectrum of compound 3t (125 MHz, CDCl<sub>3</sub>, 25 °C)

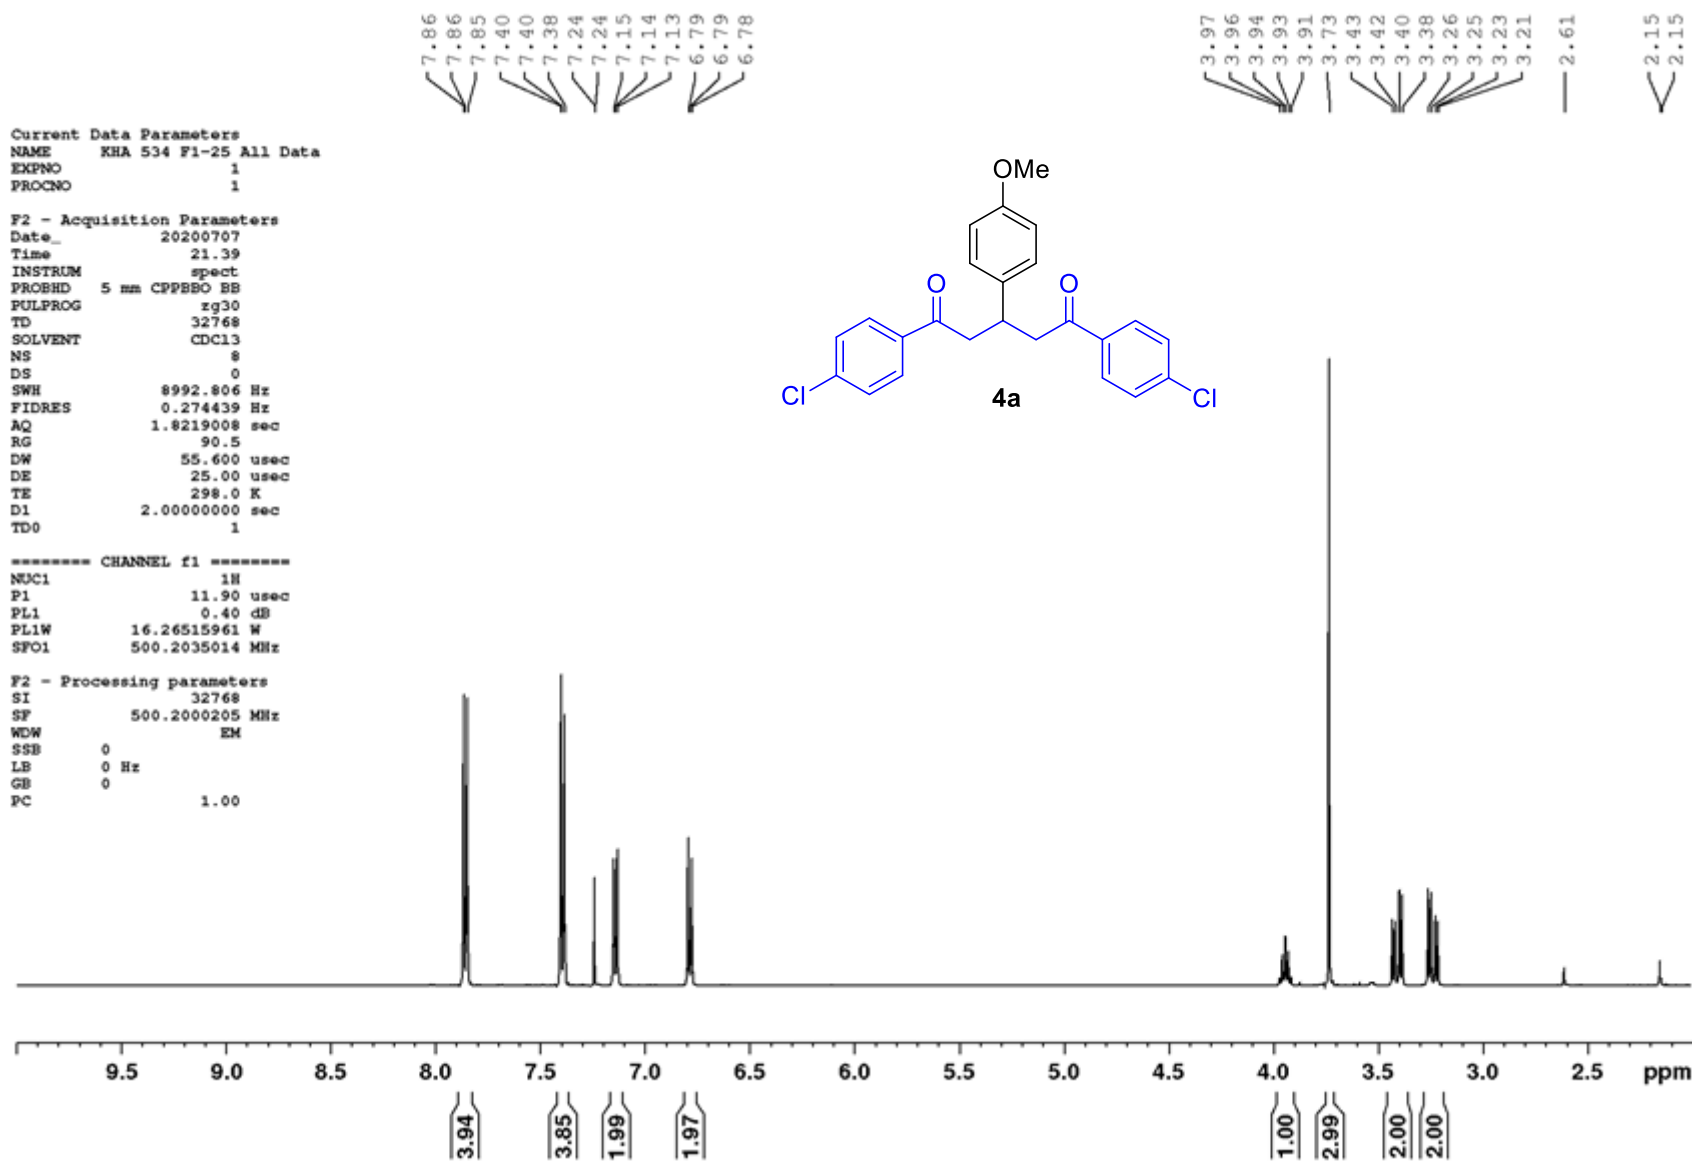

Figure S46. <sup>1</sup>H NMR spectrum of compound **4a** (500 MHz, CDCl<sub>3</sub>, 25 °C)



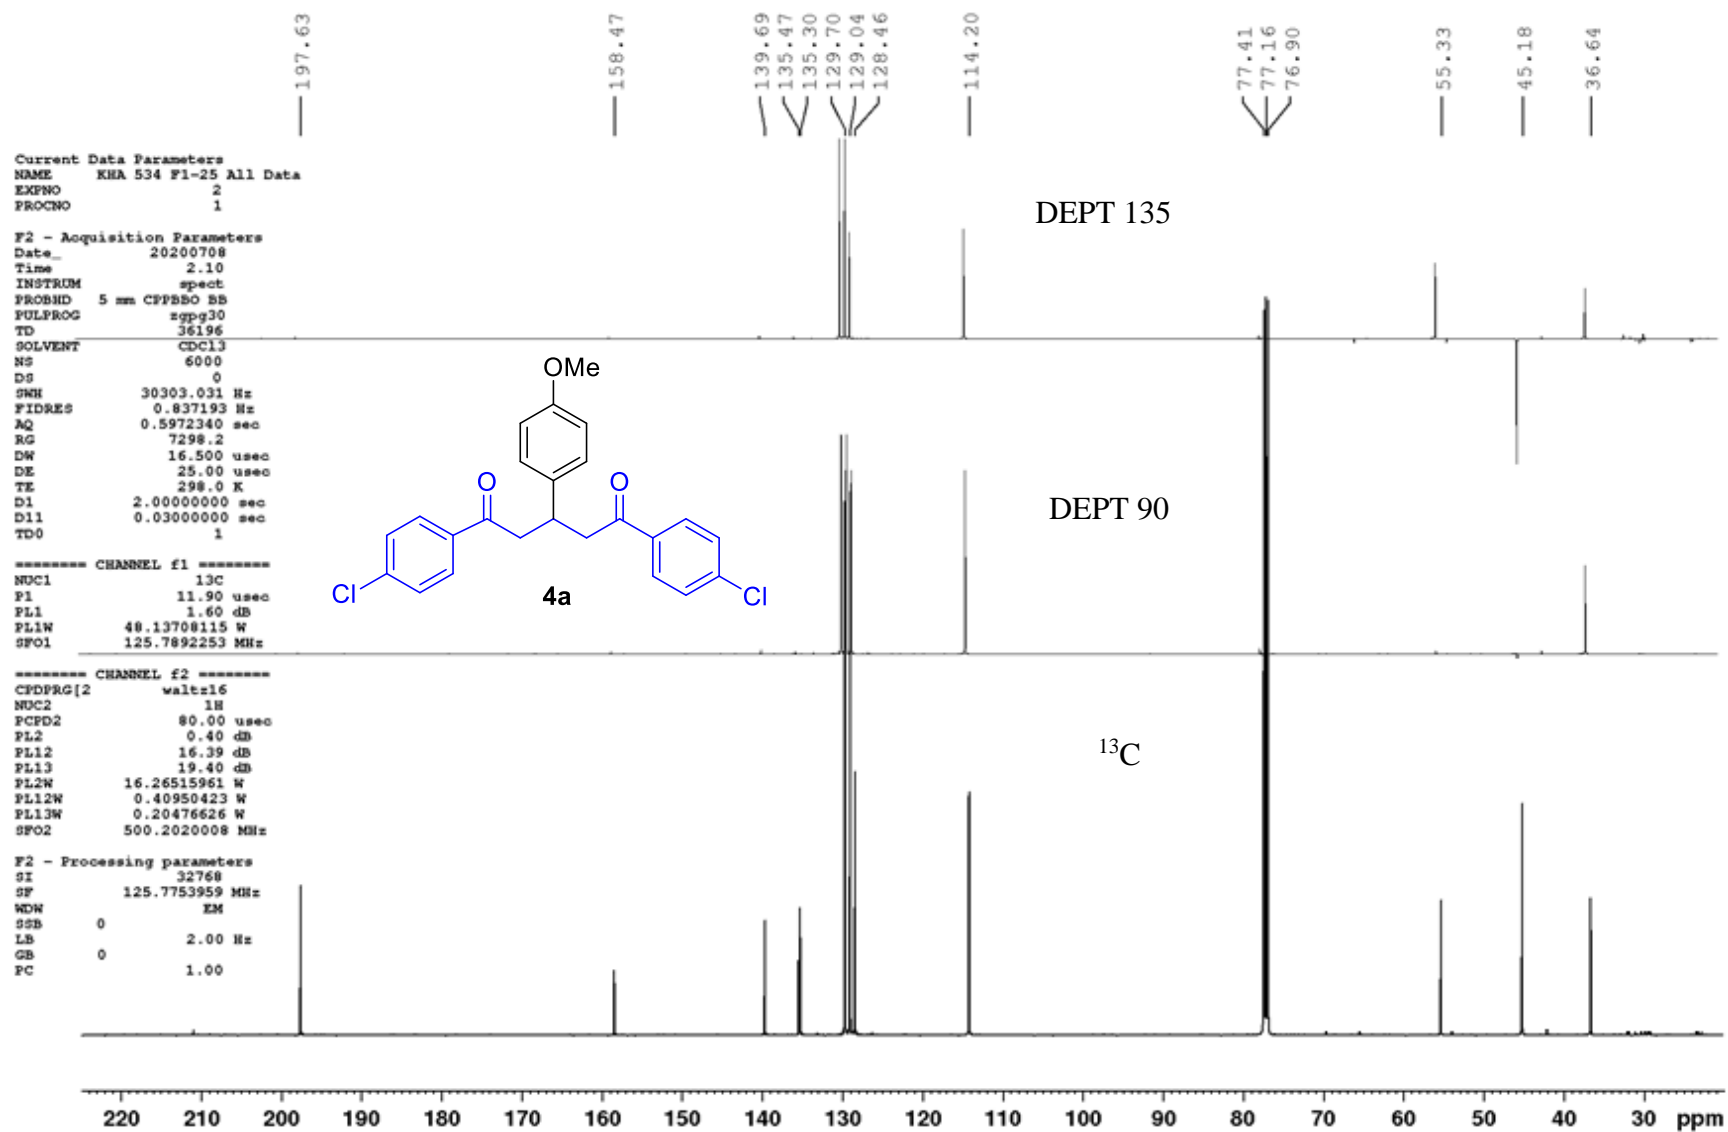

Figure S47. <sup>13</sup>C NMR spectrum of compound **4a** (125 MHz, CDCl<sub>3</sub>, 25 °C)

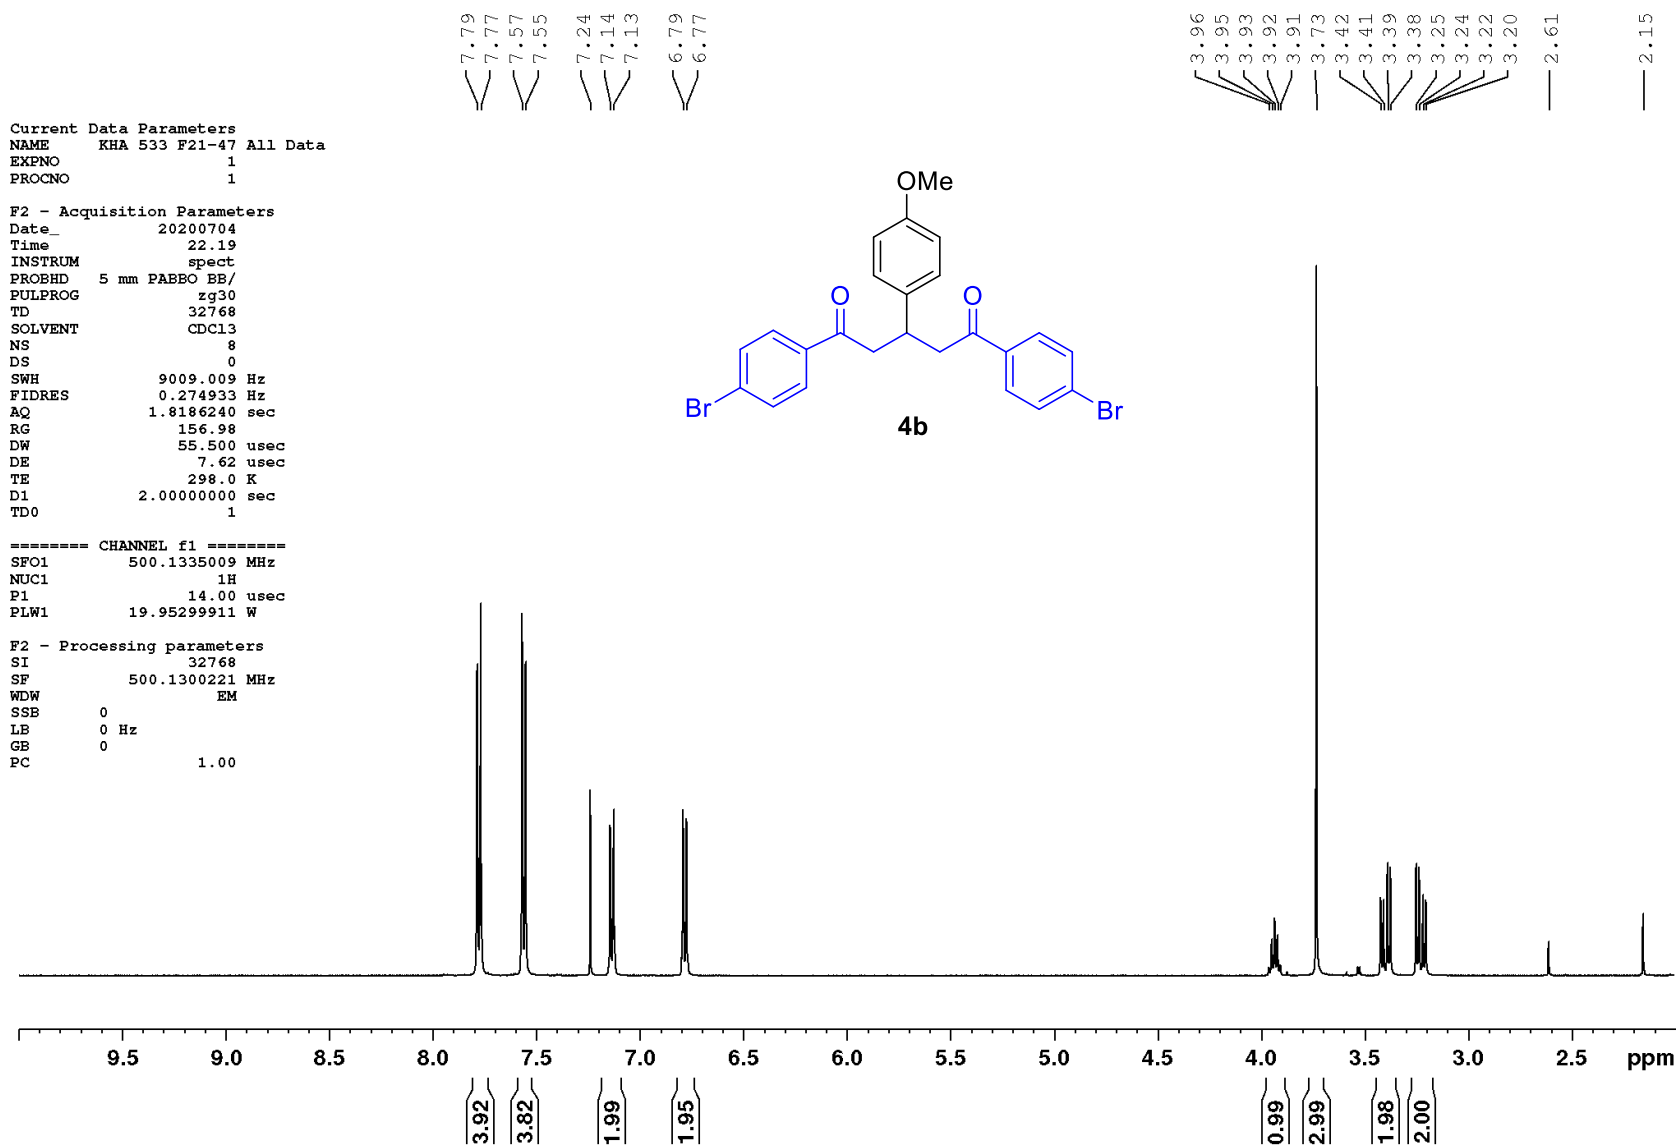

Figure S48.  $^1\text{H}$  NMR spectrum of compound **4b** (500 MHz,  $\text{CDCl}_3$ , 25  $^\circ\text{C}$ )

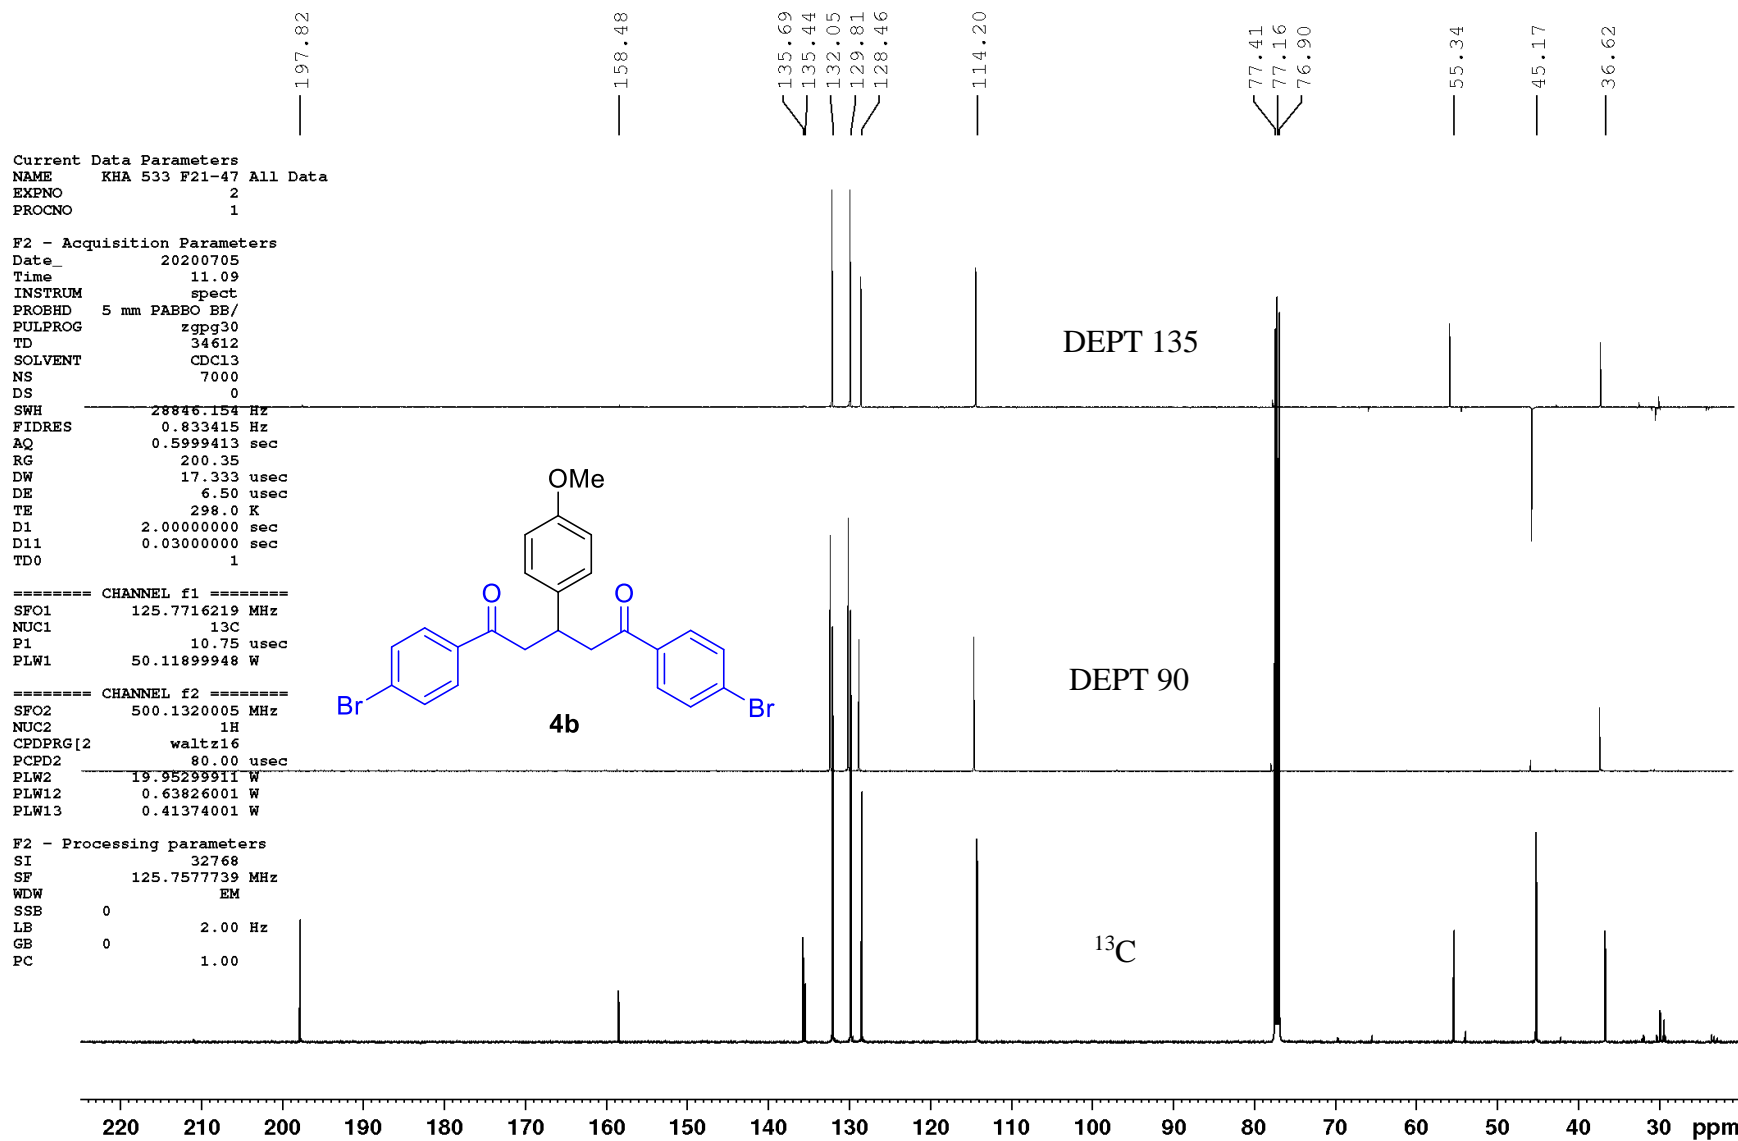

Figure S49. <sup>13</sup>C NMR spectrum of compound **4b** (125 MHz, CDCl<sub>3</sub>, 25 °C)

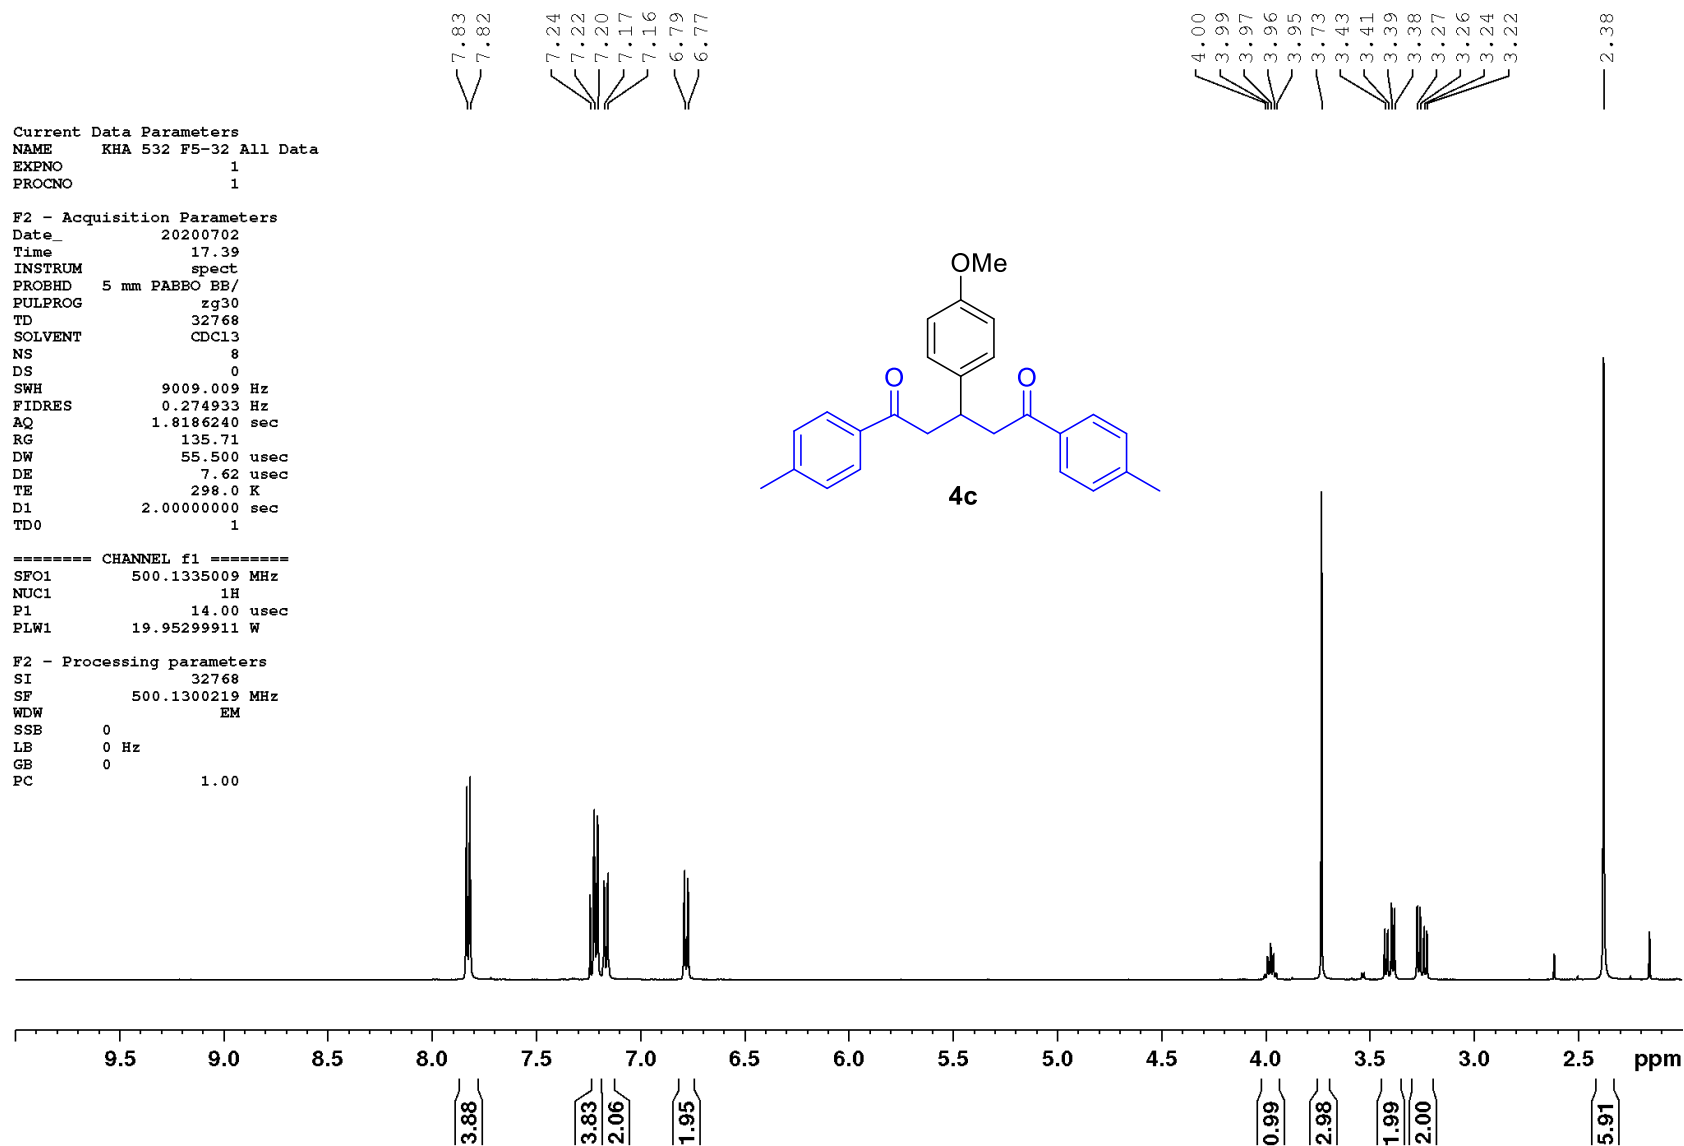

Figure S50. <sup>1</sup>H NMR spectrum of compound **4c** (500 MHz, CDCl<sub>3</sub>, 25 °C)

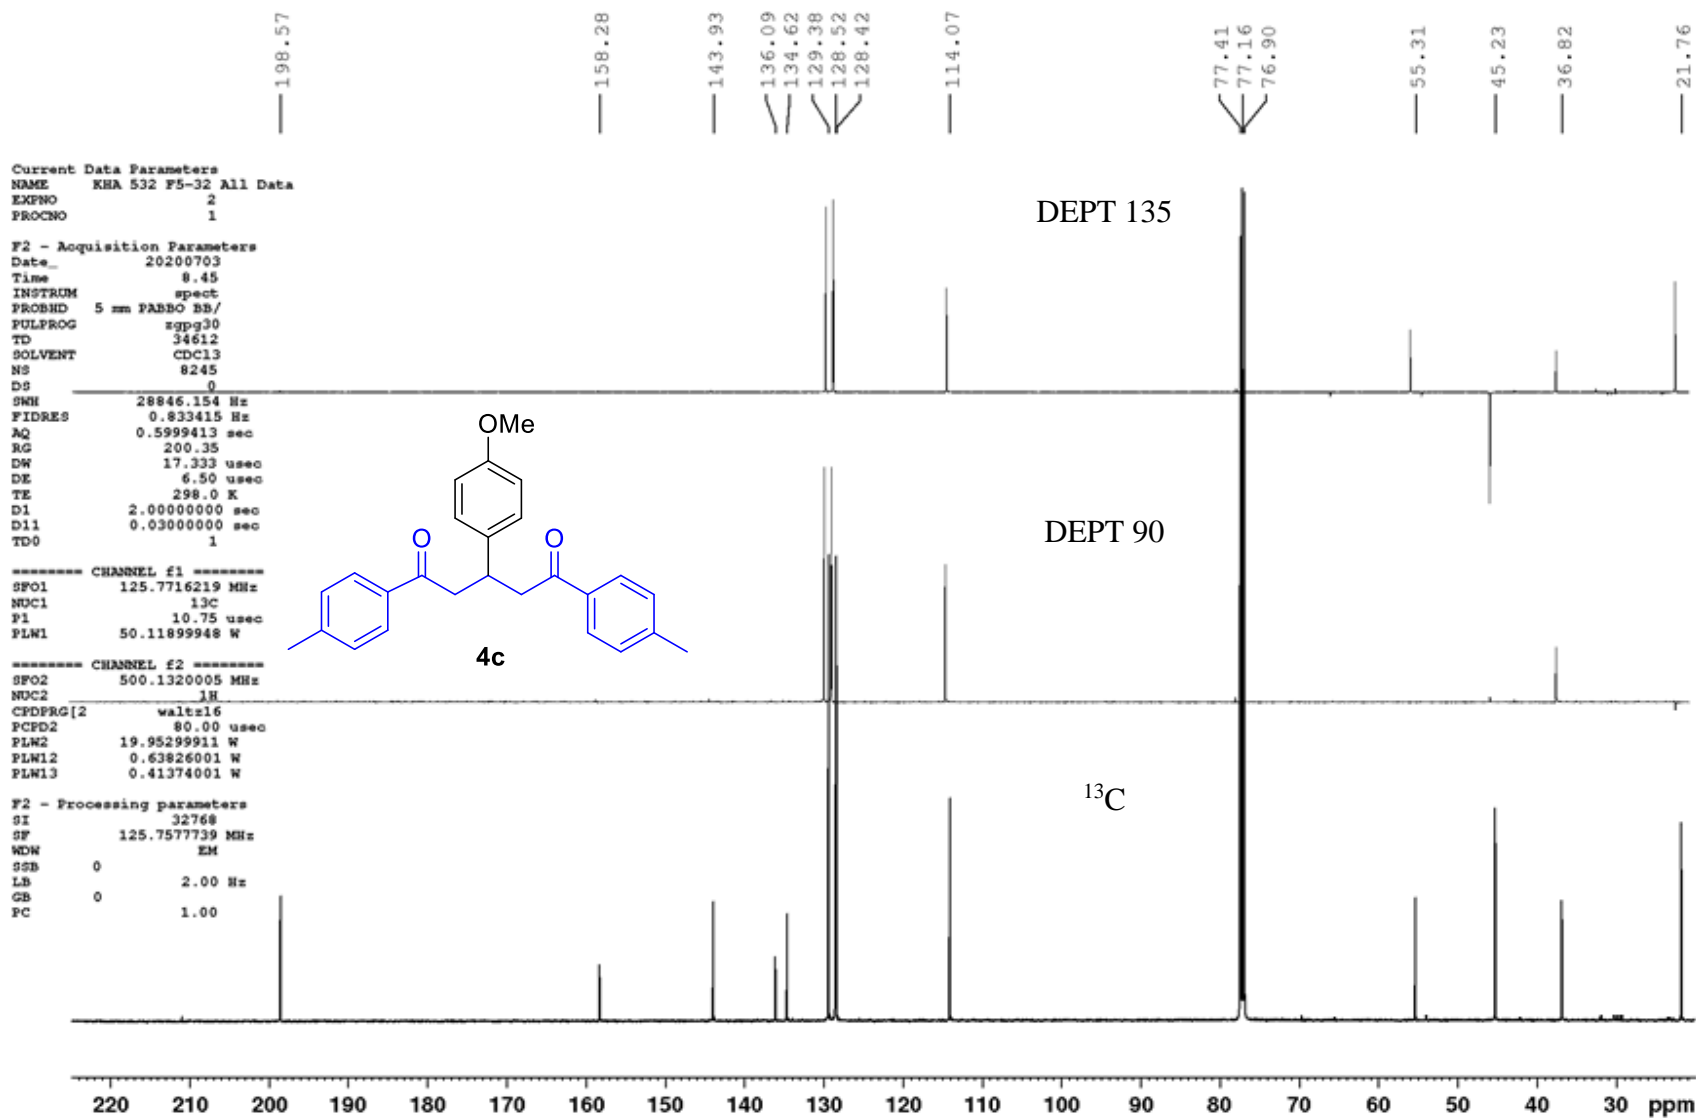

Figure S51. <sup>13</sup>C NMR spectrum of compound 4c (125 MHz, CDCl<sub>3</sub>, 25 °C)

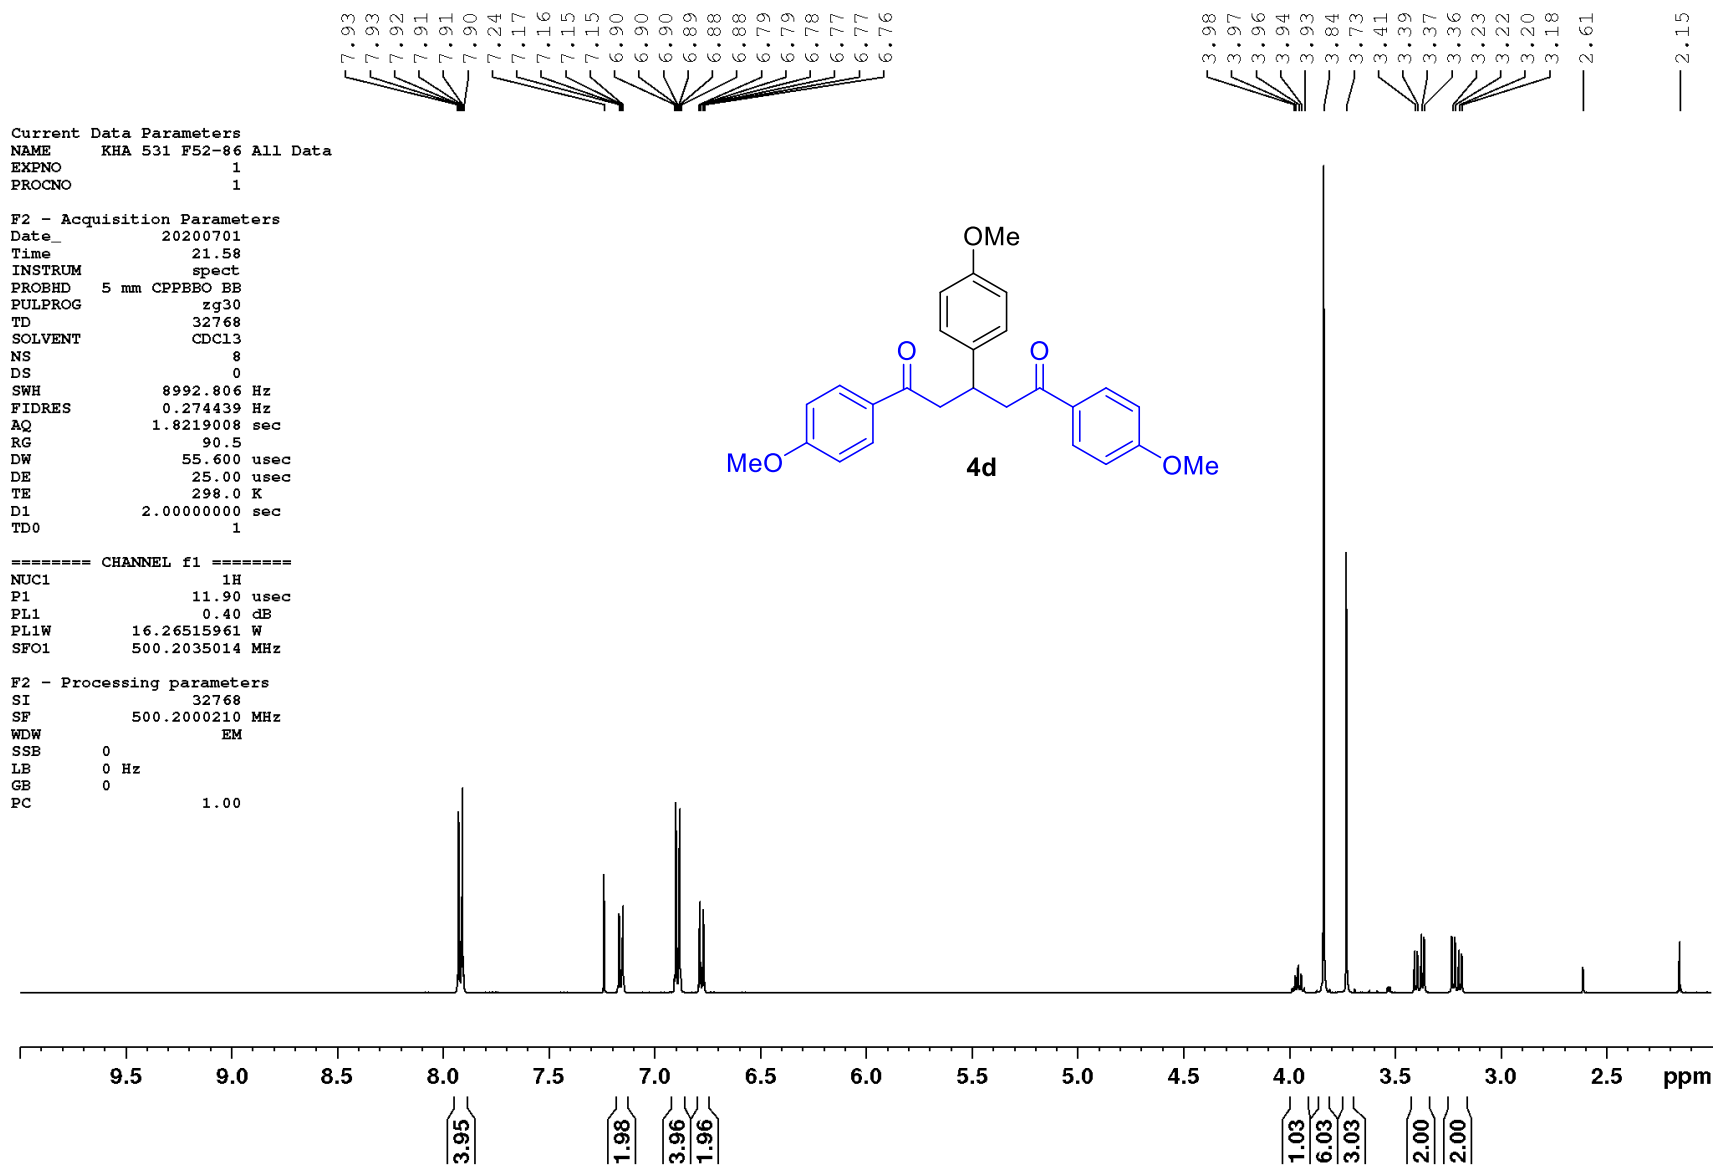

Figure S52. <sup>1</sup>H NMR spectrum of compound **4d** (500 MHz, CDCl<sub>3</sub>, 25 °C)

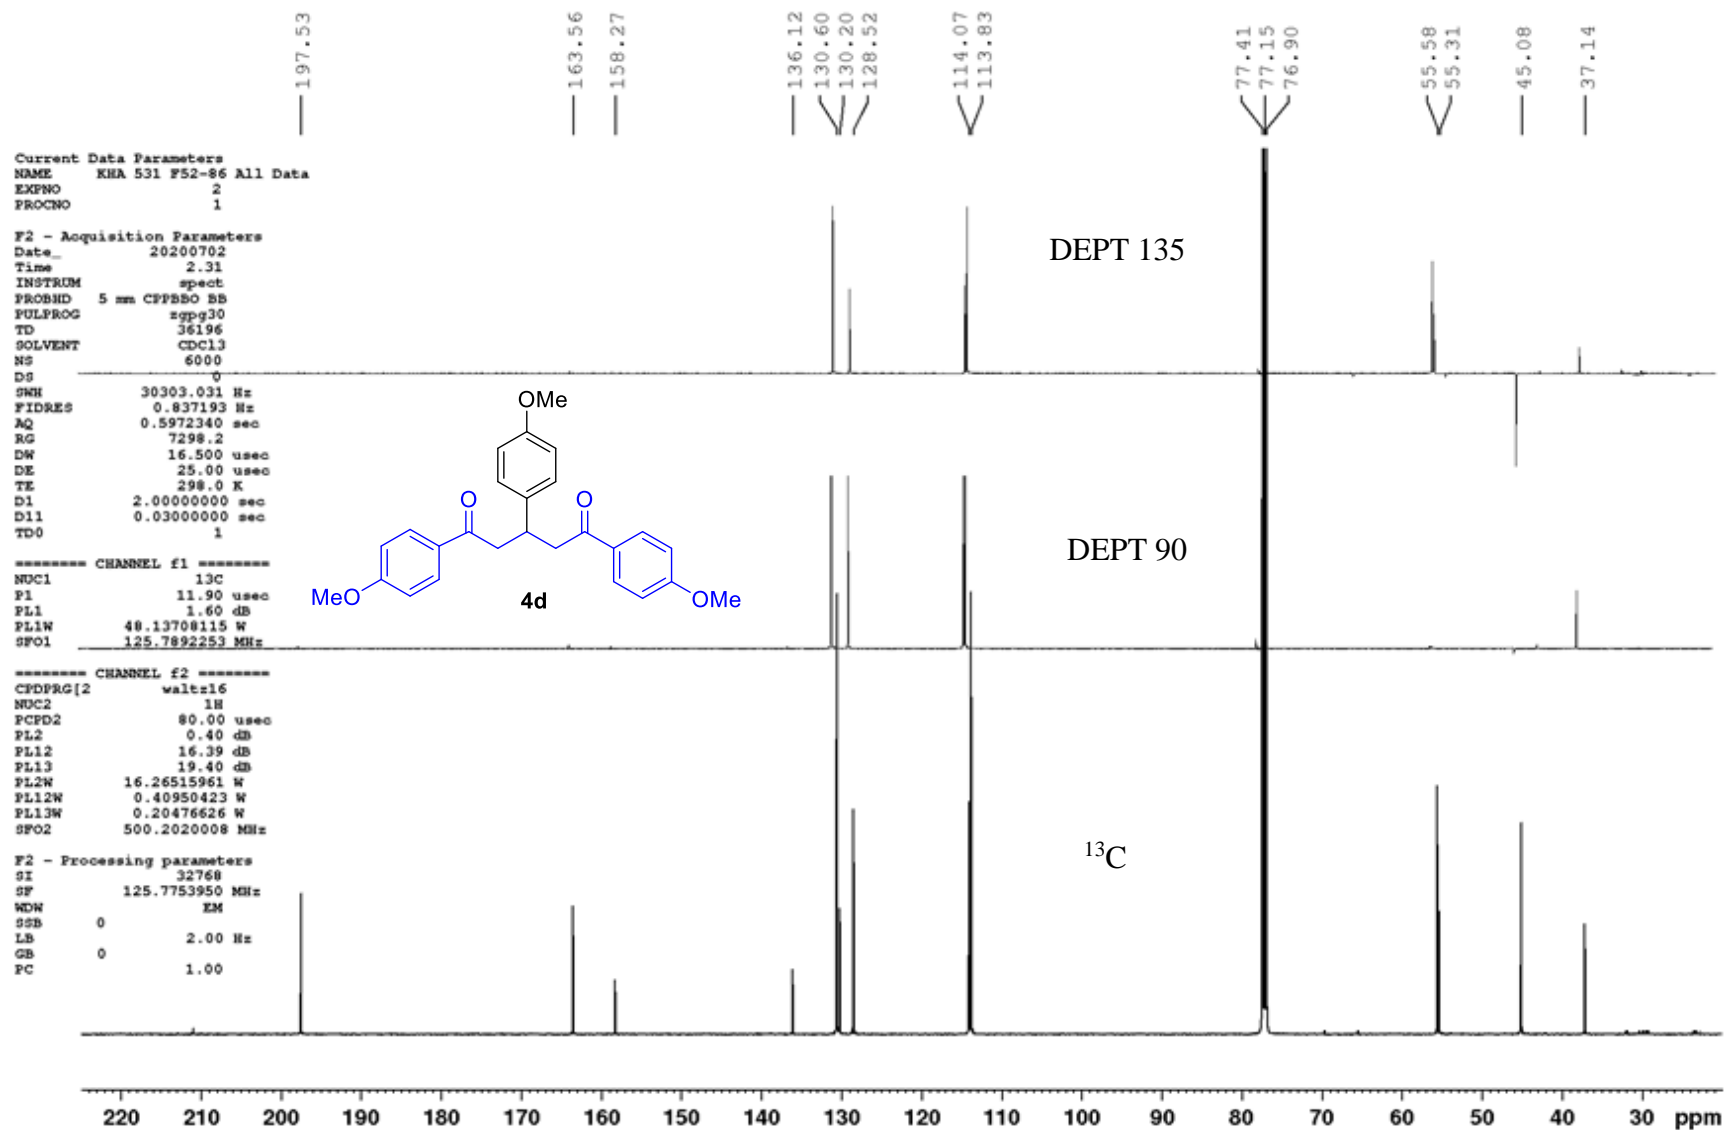

Figure S53. <sup>13</sup>C NMR spectrum of compound **4d** (125 MHz, CDCl<sub>3</sub>, 25 °C)

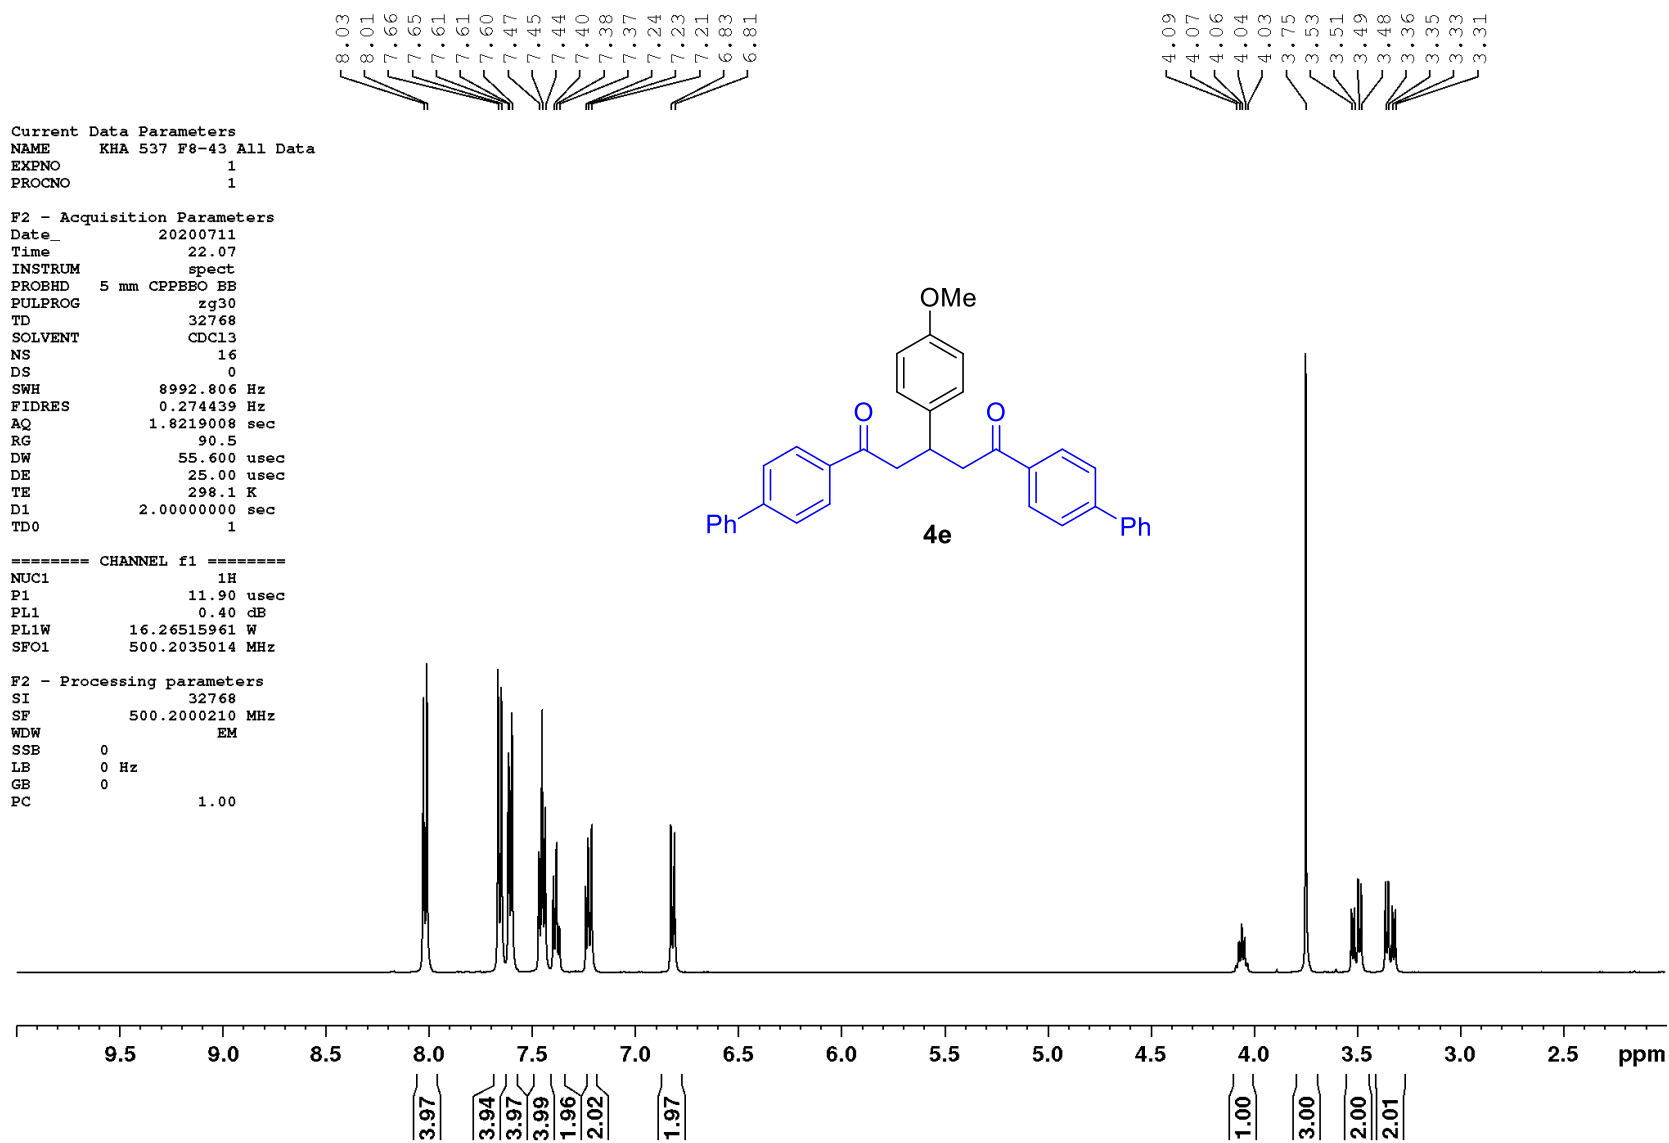

Figure S54. <sup>1</sup>H NMR spectrum of compound **4e** (500 MHz, CDCl<sub>3</sub>, 25 °C)



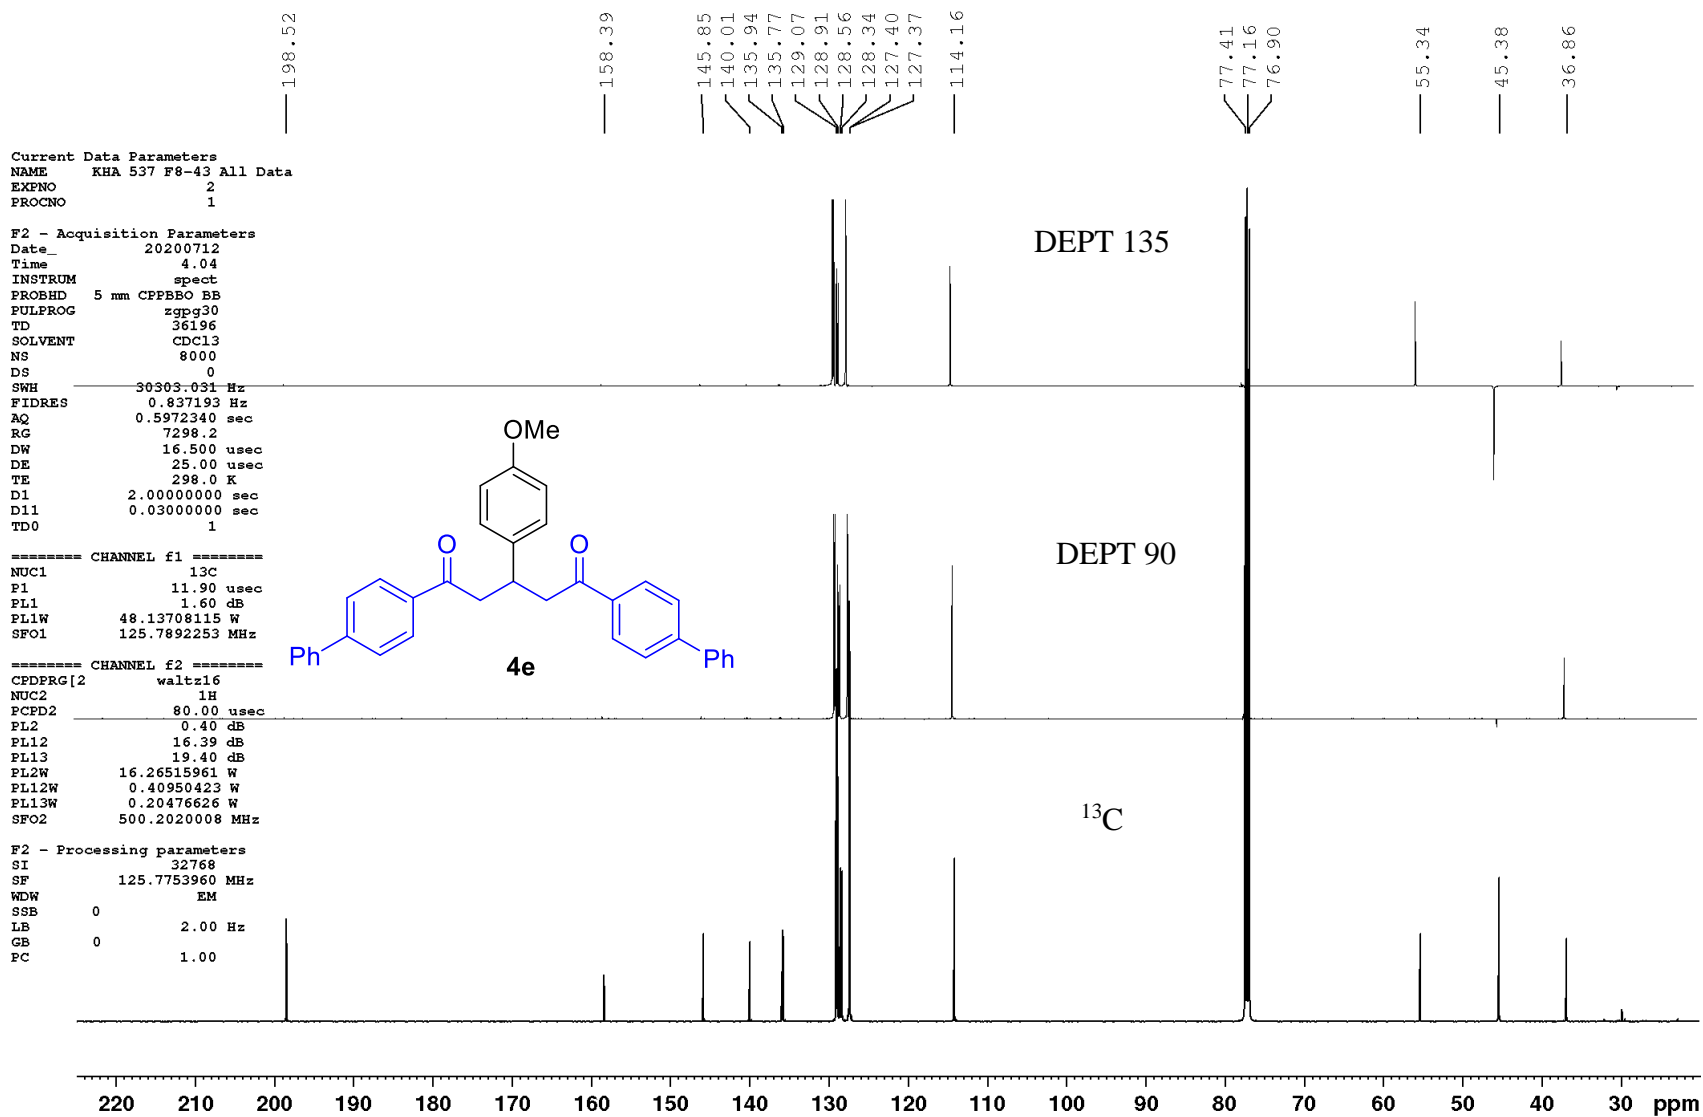

Figure S55. <sup>13</sup>C NMR spectrum of compound **4e** (125 MHz, CDCl<sub>3</sub>, 25 °C)

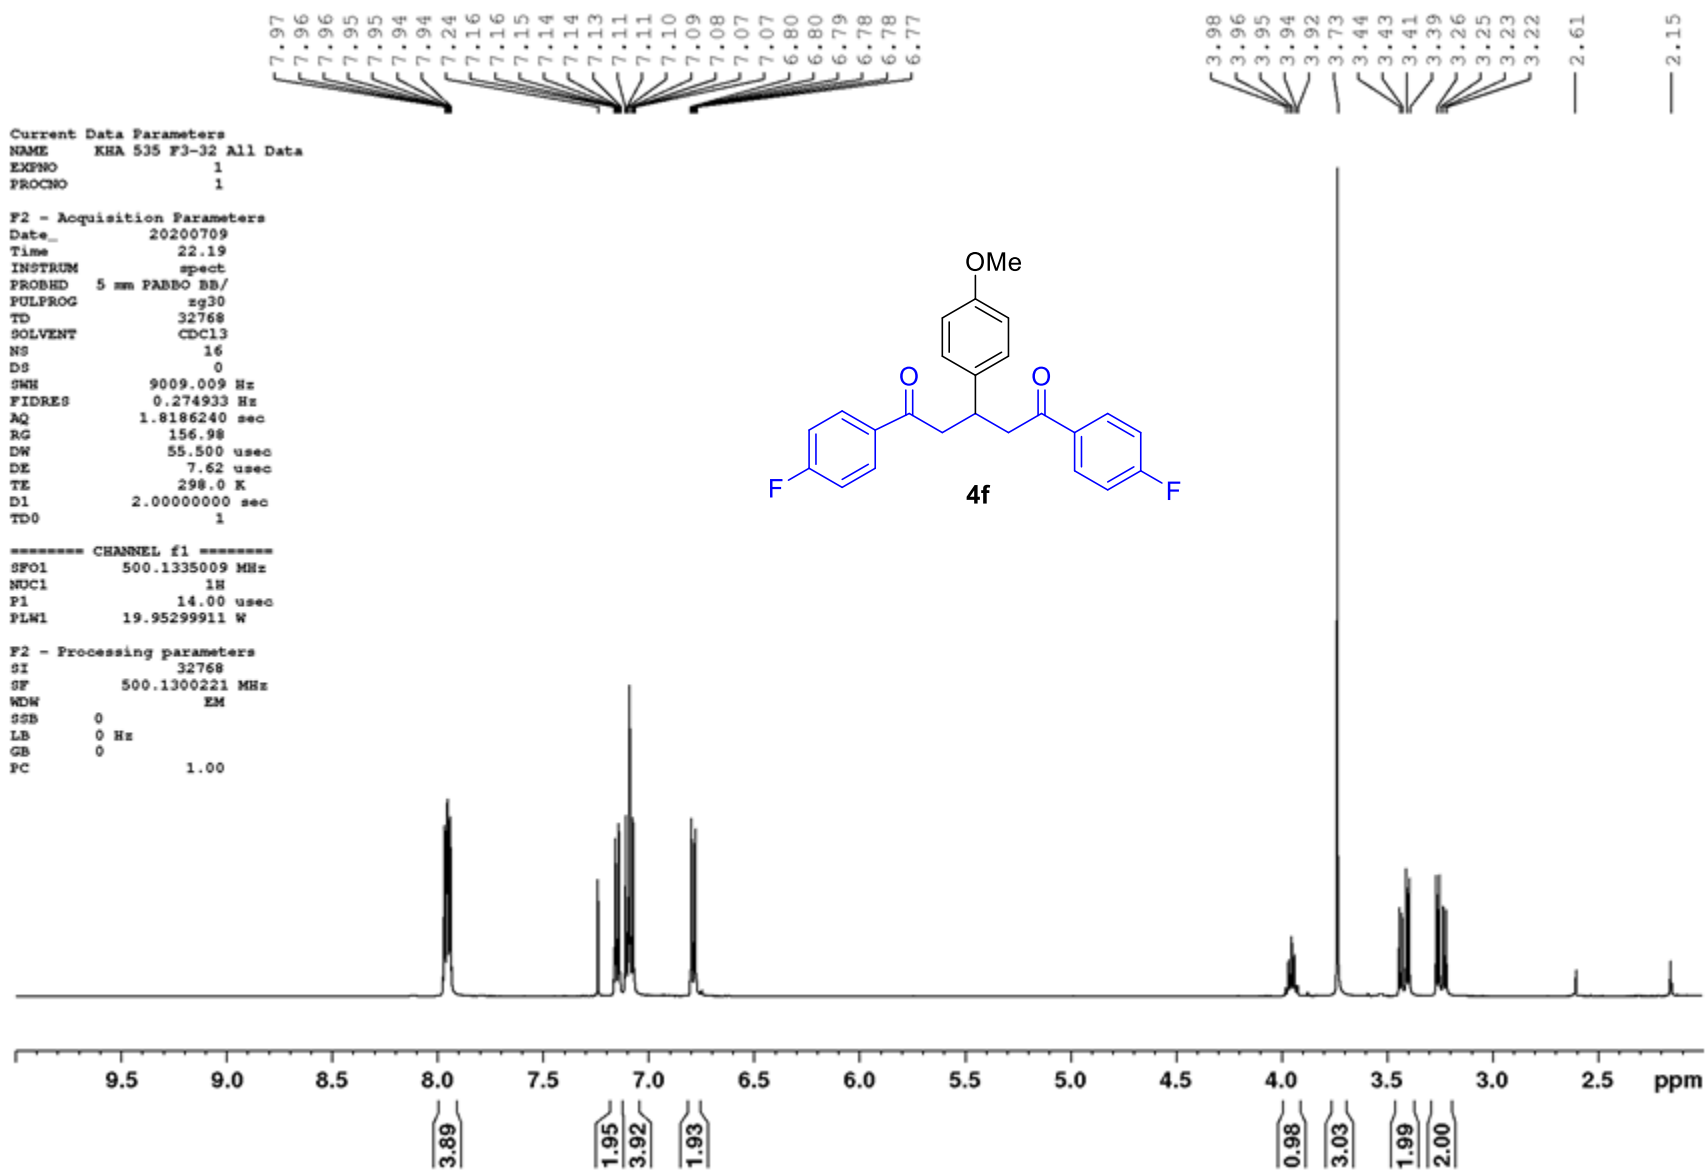

Figure S56. <sup>1</sup>H NMR spectrum of compound **4f** (500 MHz, CDCl<sub>3</sub>, 25 °C)

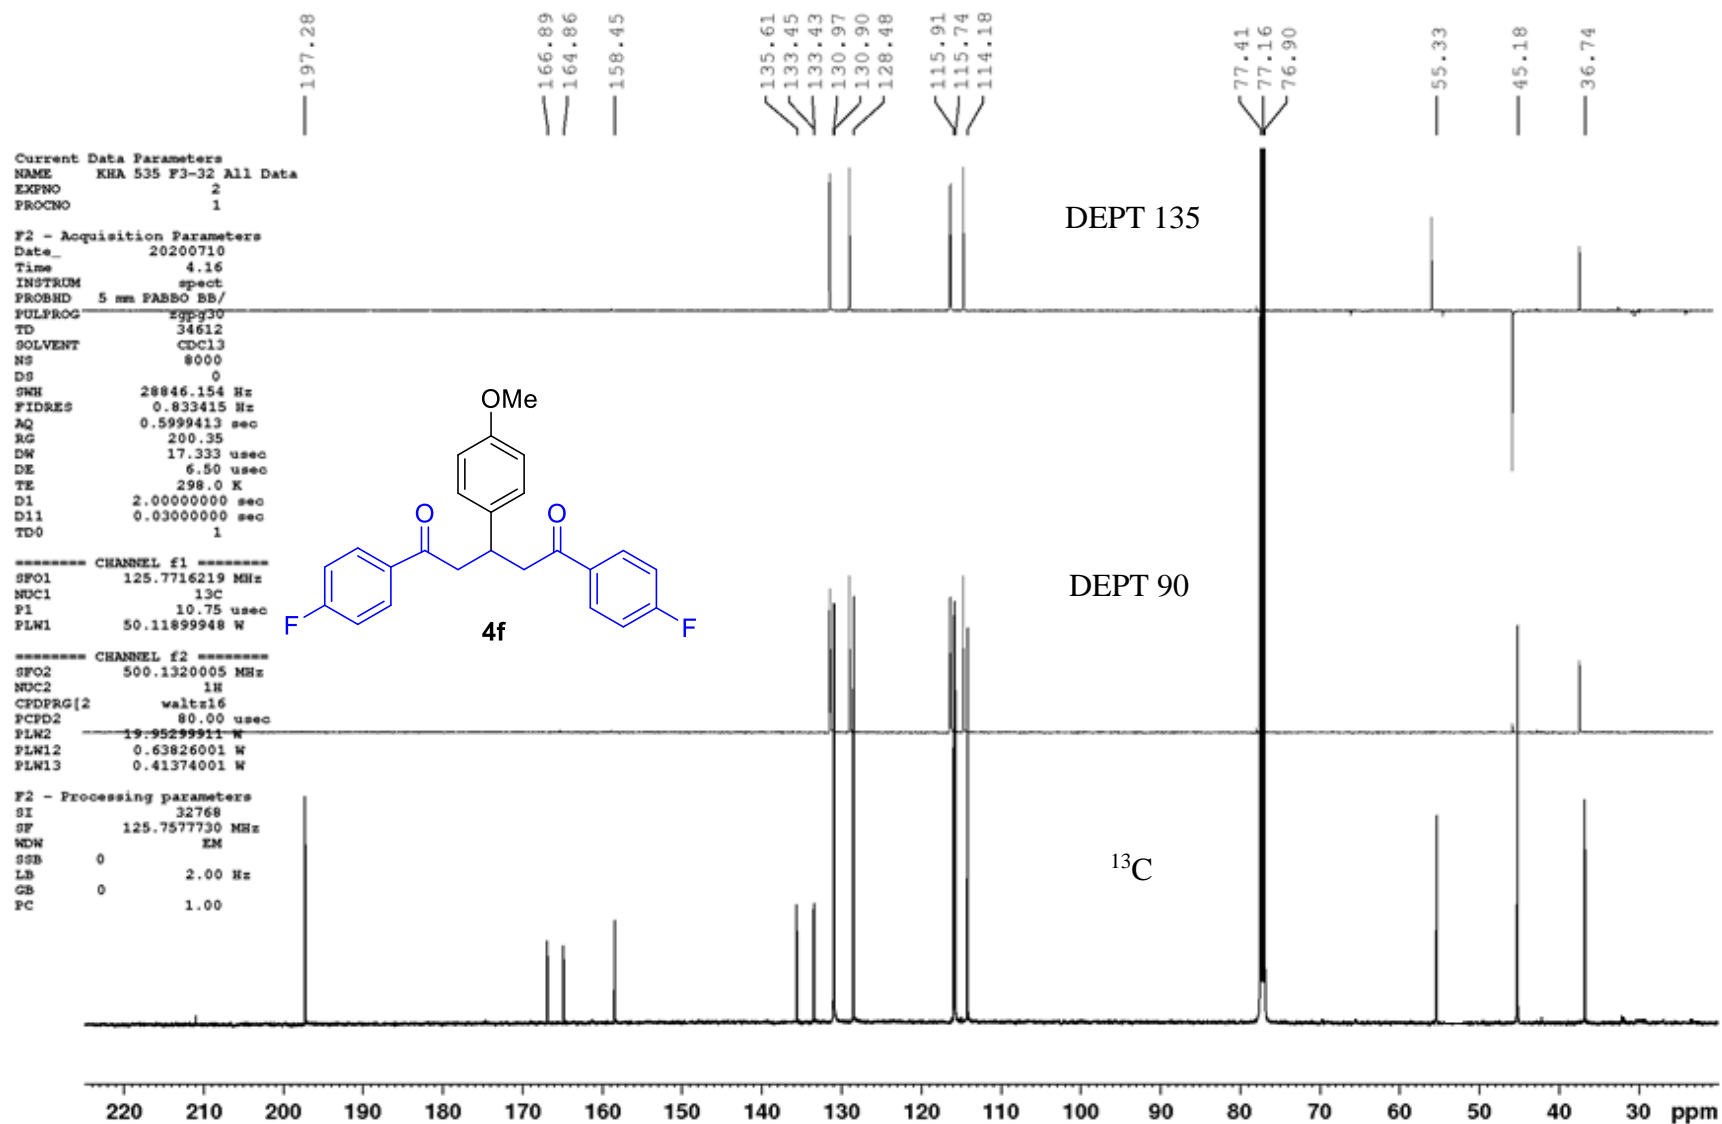

Figure S57. <sup>13</sup>C NMR spectrum of compound **4f** (125 MHz, CDCl<sub>3</sub>, 25 °C)

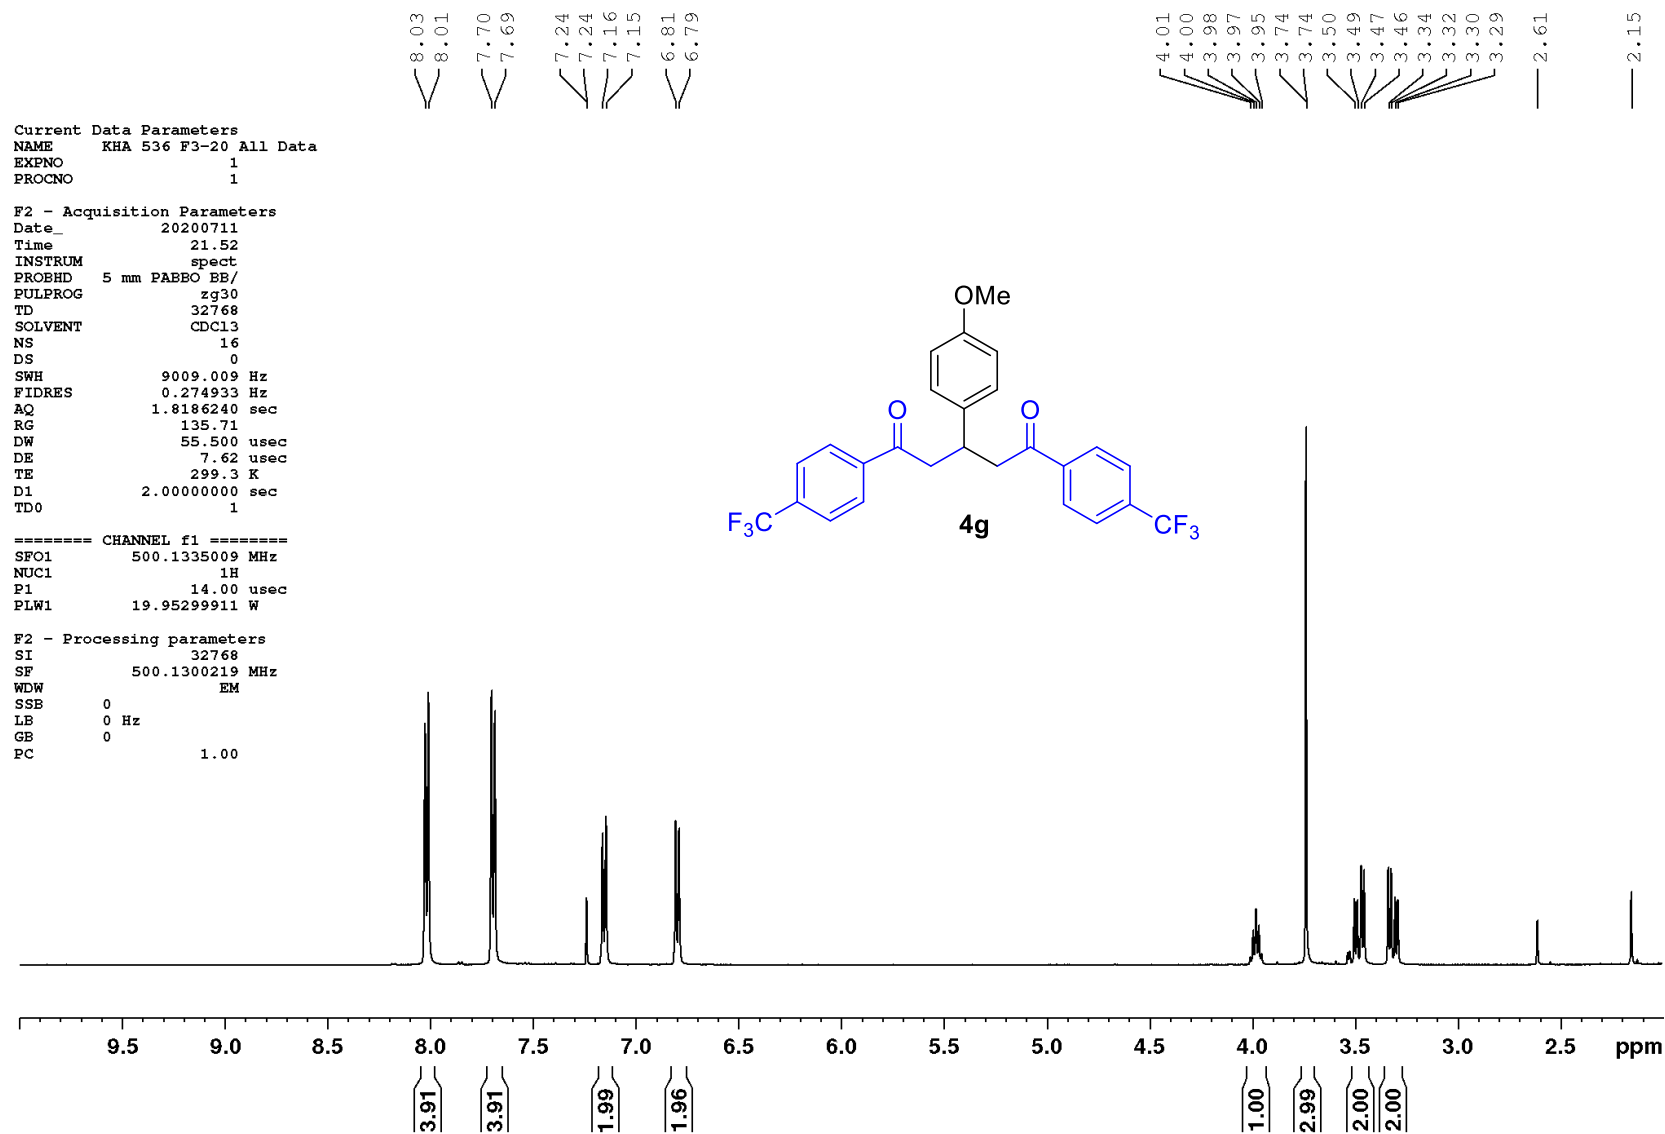

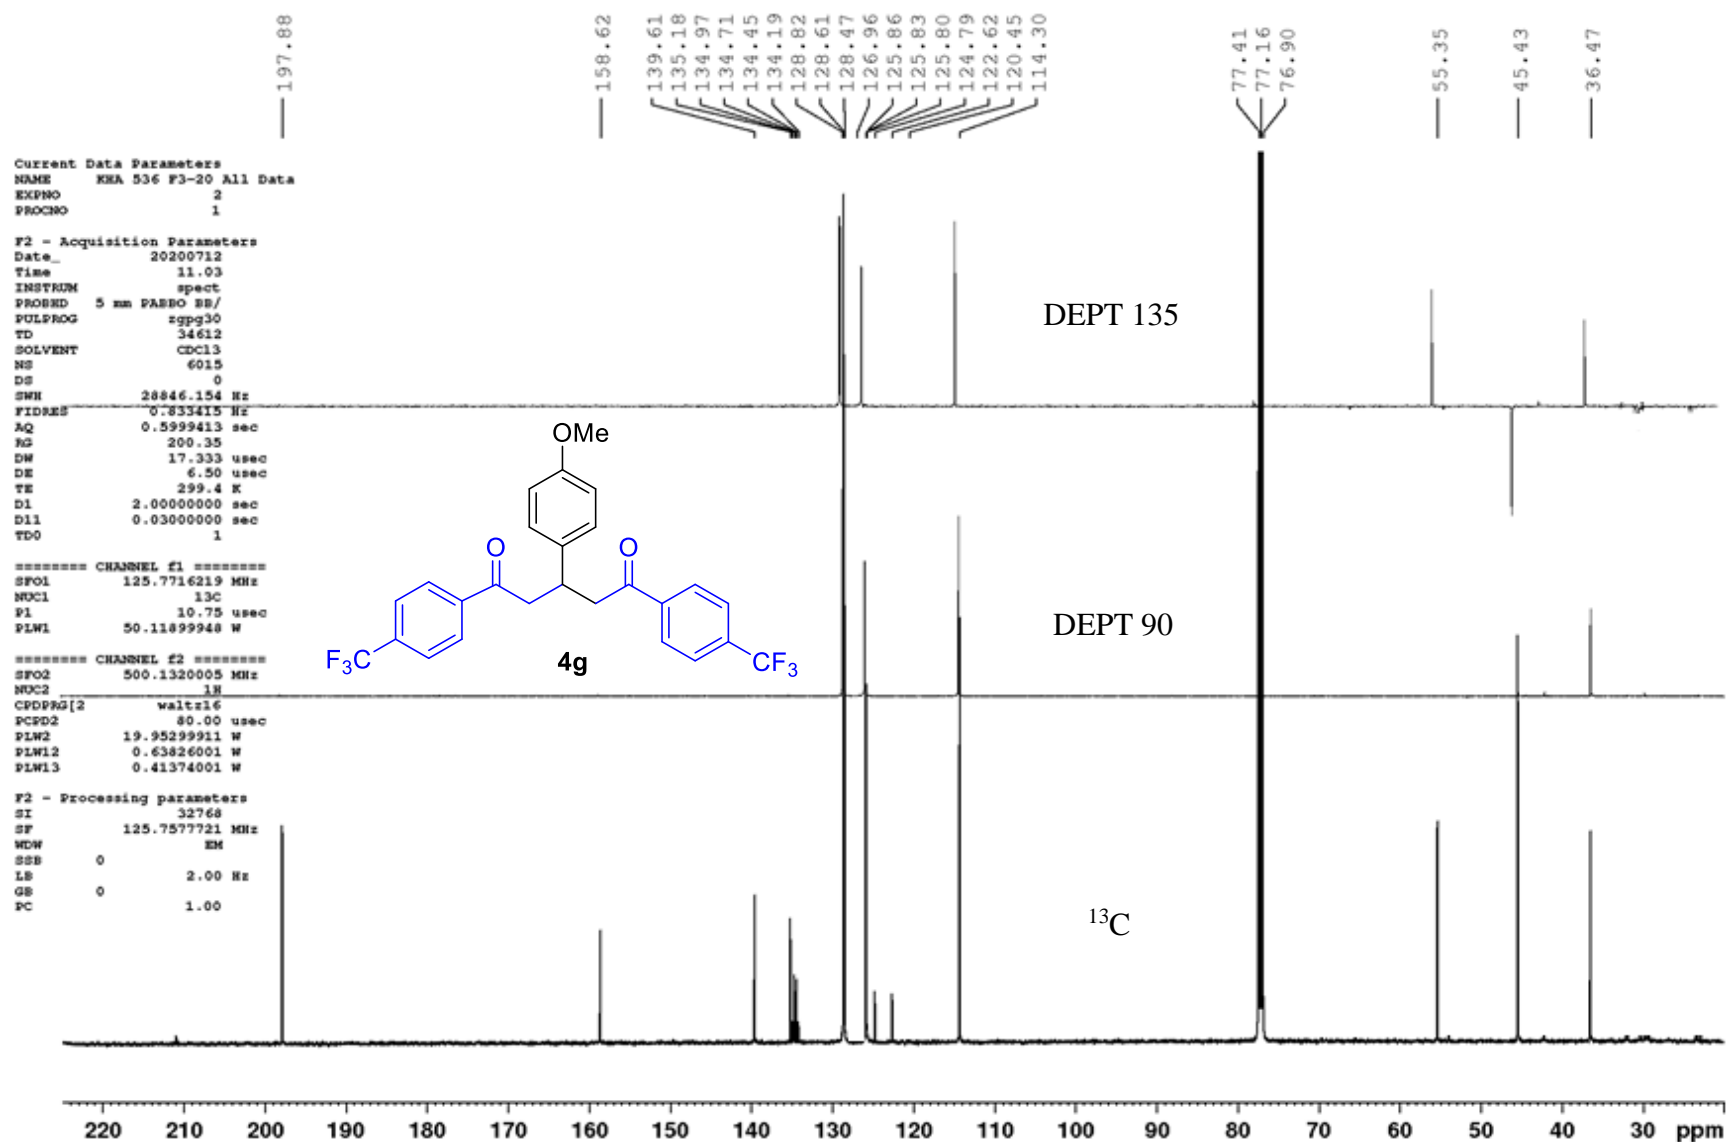

Figure S59. <sup>13</sup>C NMR spectrum of compound **4g** (125 MHz, CDCl<sub>3</sub>, 25 °C)

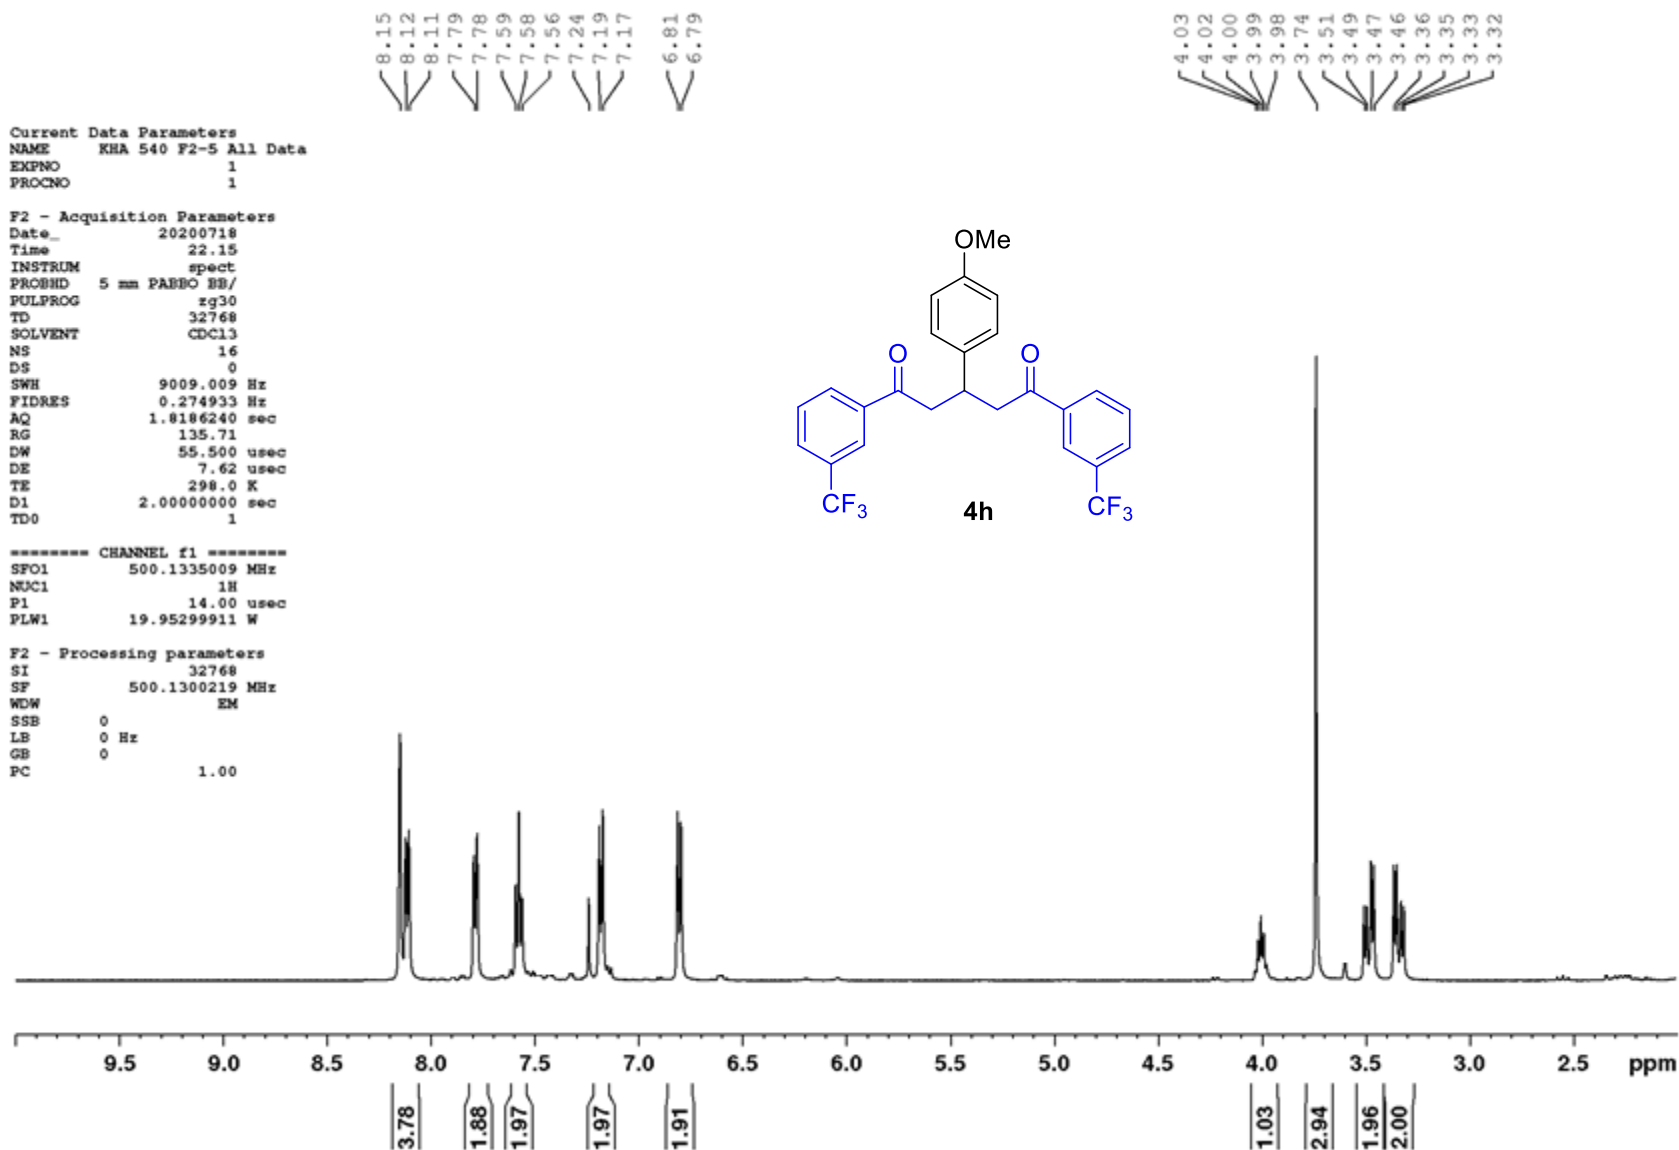

Figure S60. <sup>1</sup>H NMR spectrum of compound **4h** (500 MHz, CDCl<sub>3</sub>, 25 °C)

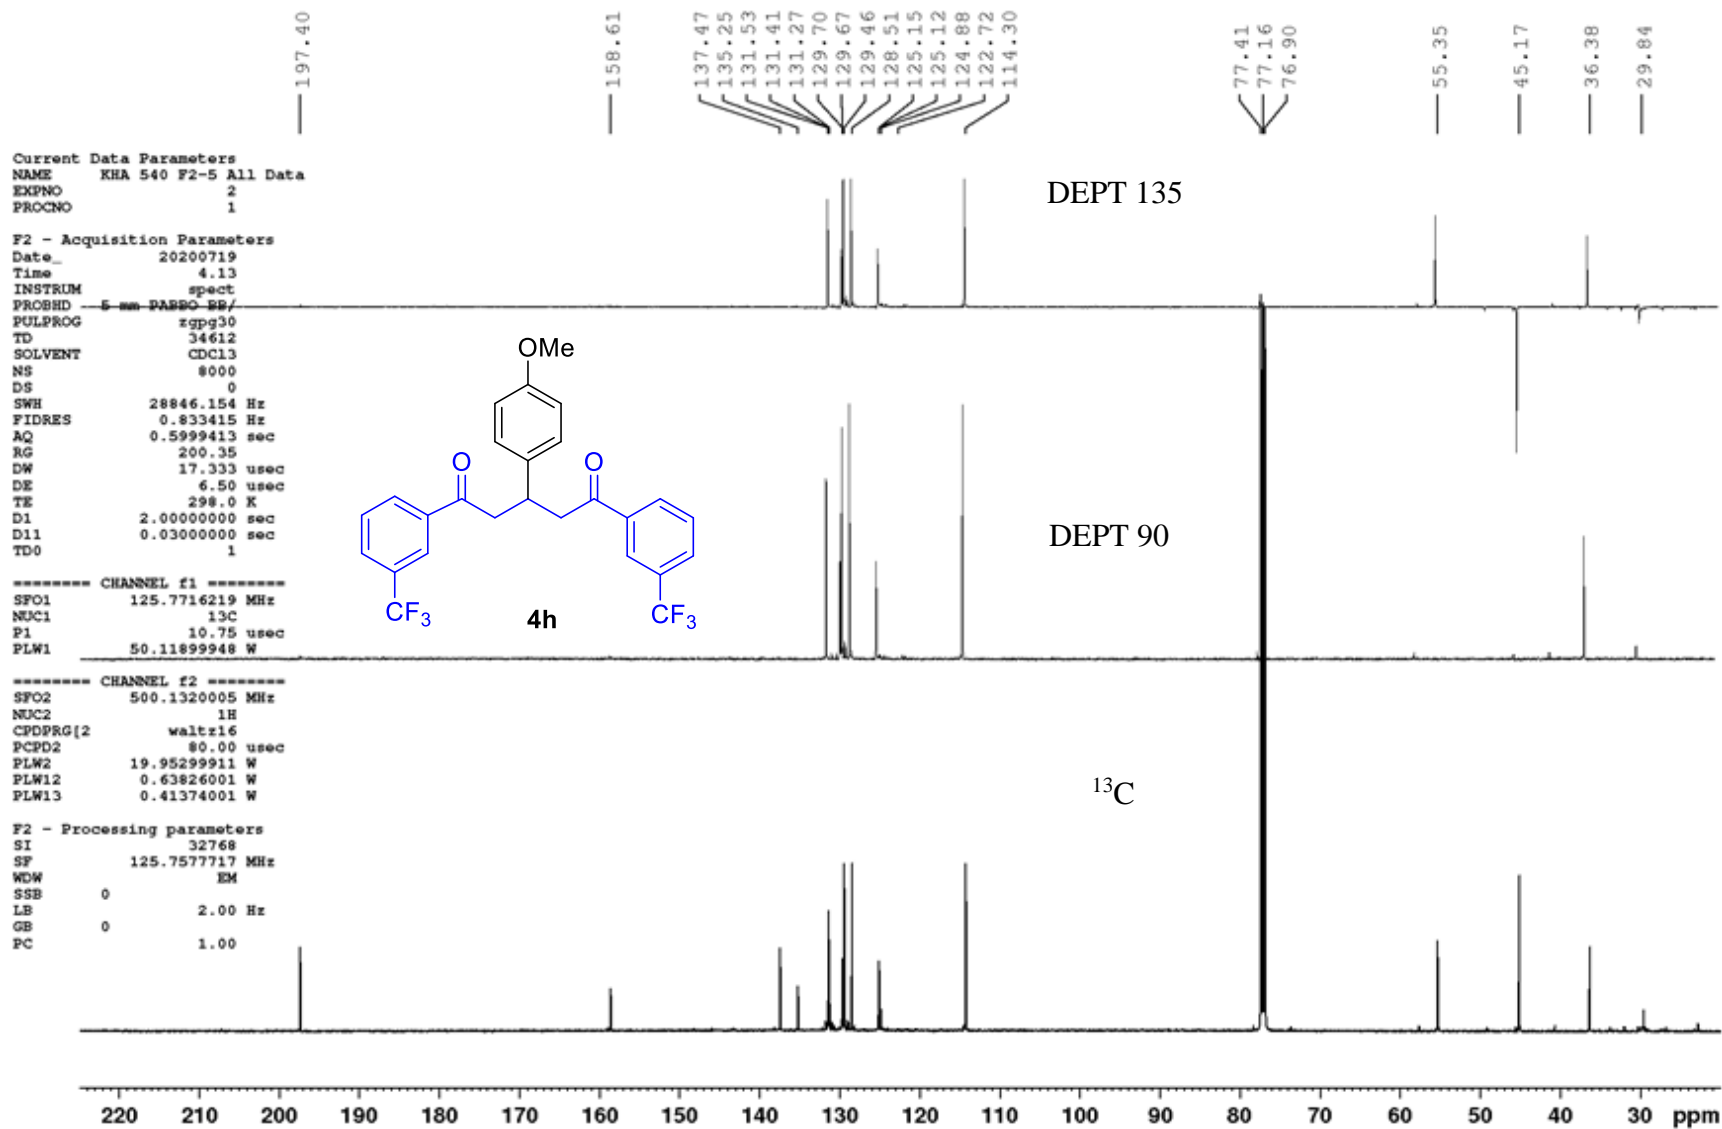

Figure S61. <sup>13</sup>C NMR spectrum of compound **4h** (125 MHz, CDCl<sub>3</sub>, 25 °C)

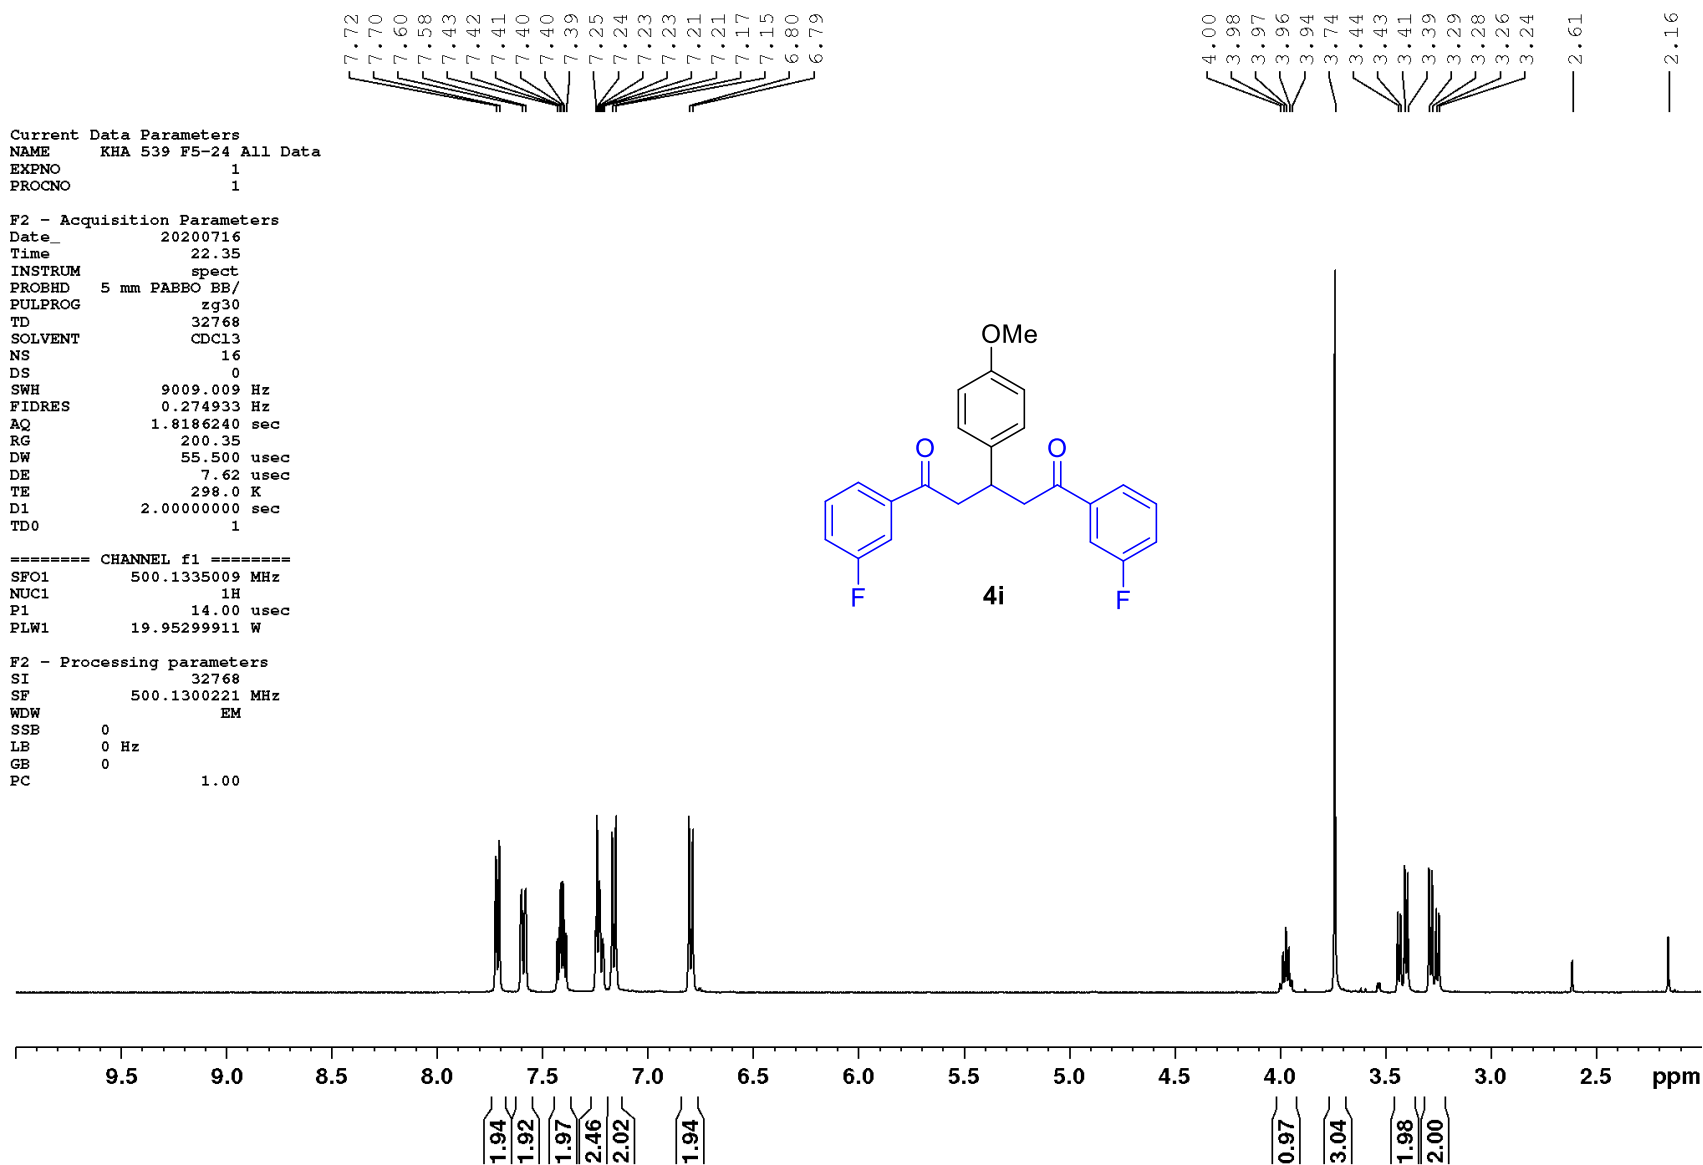

Figure S62. <sup>1</sup>H NMR spectrum of compound **4i** (500 MHz, CDCl<sub>3</sub>, 25 °C)



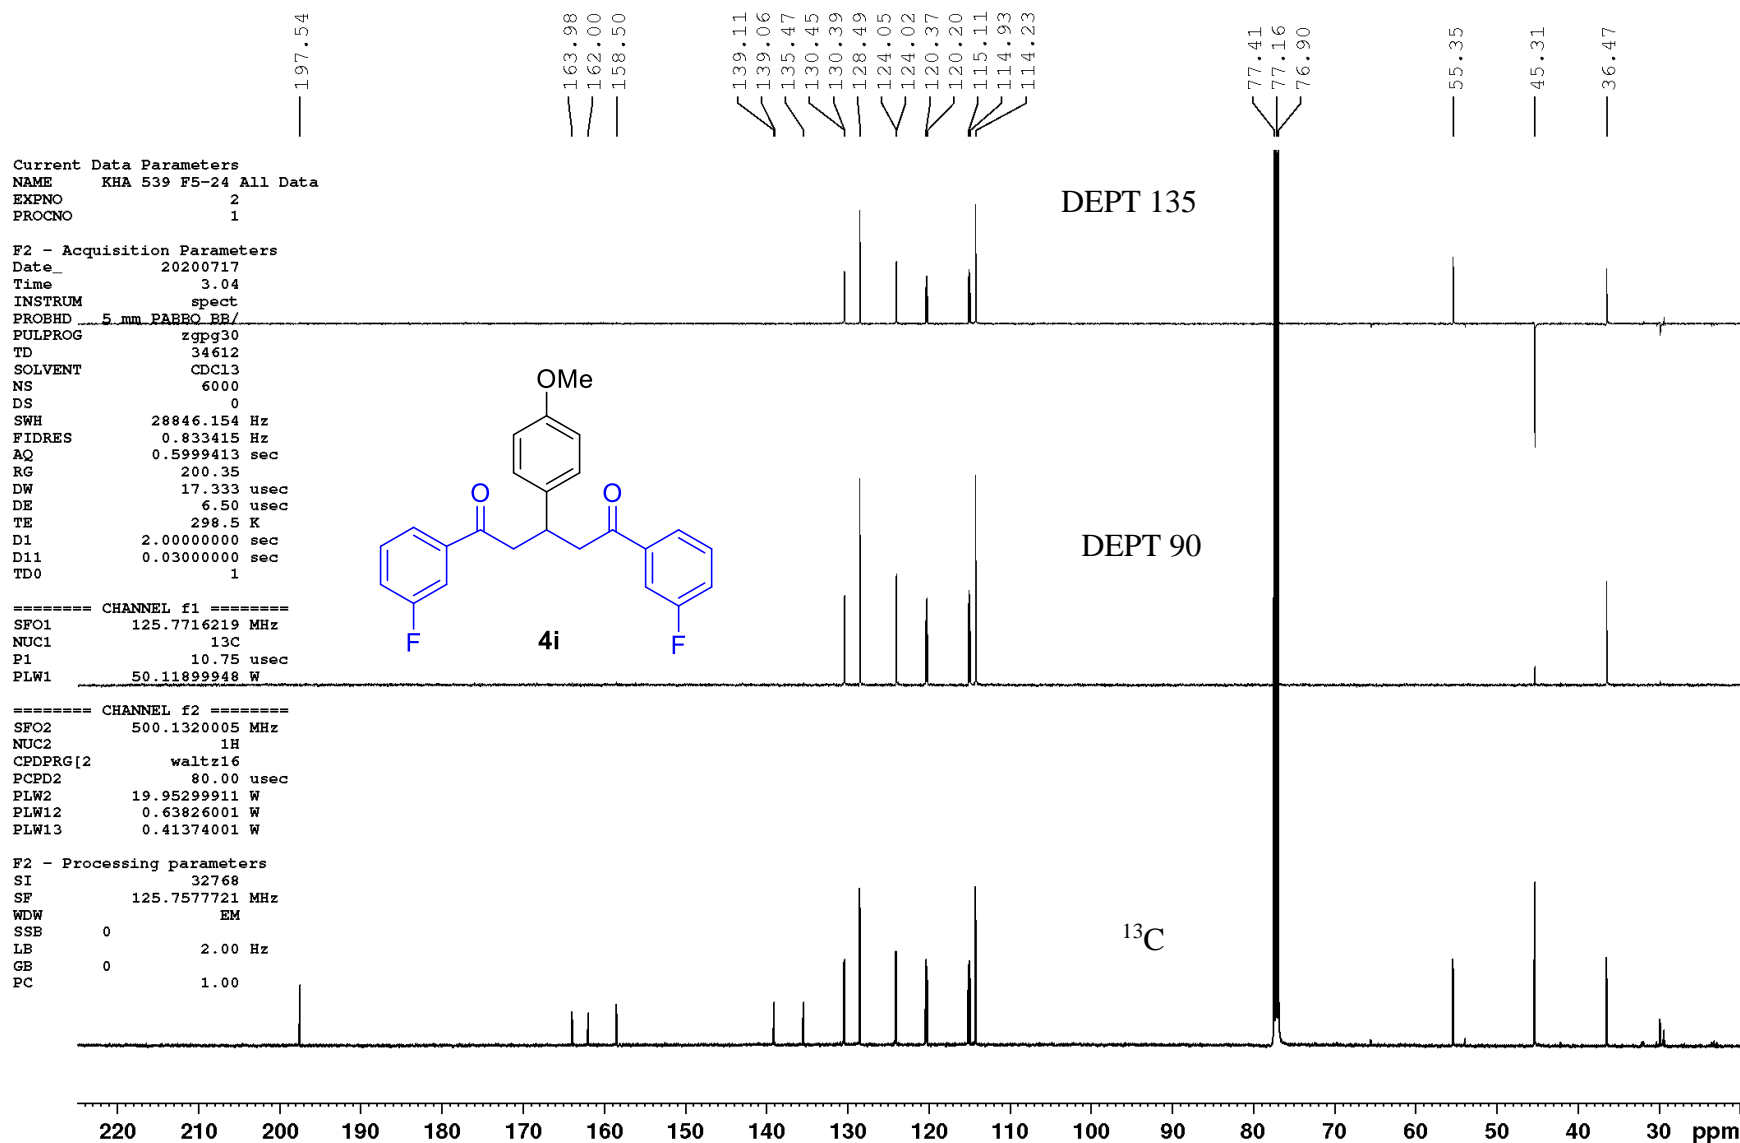

Figure S63. <sup>13</sup>C NMR spectrum of compound **4i** (125 MHz, CDCl<sub>3</sub>, 25 °C)

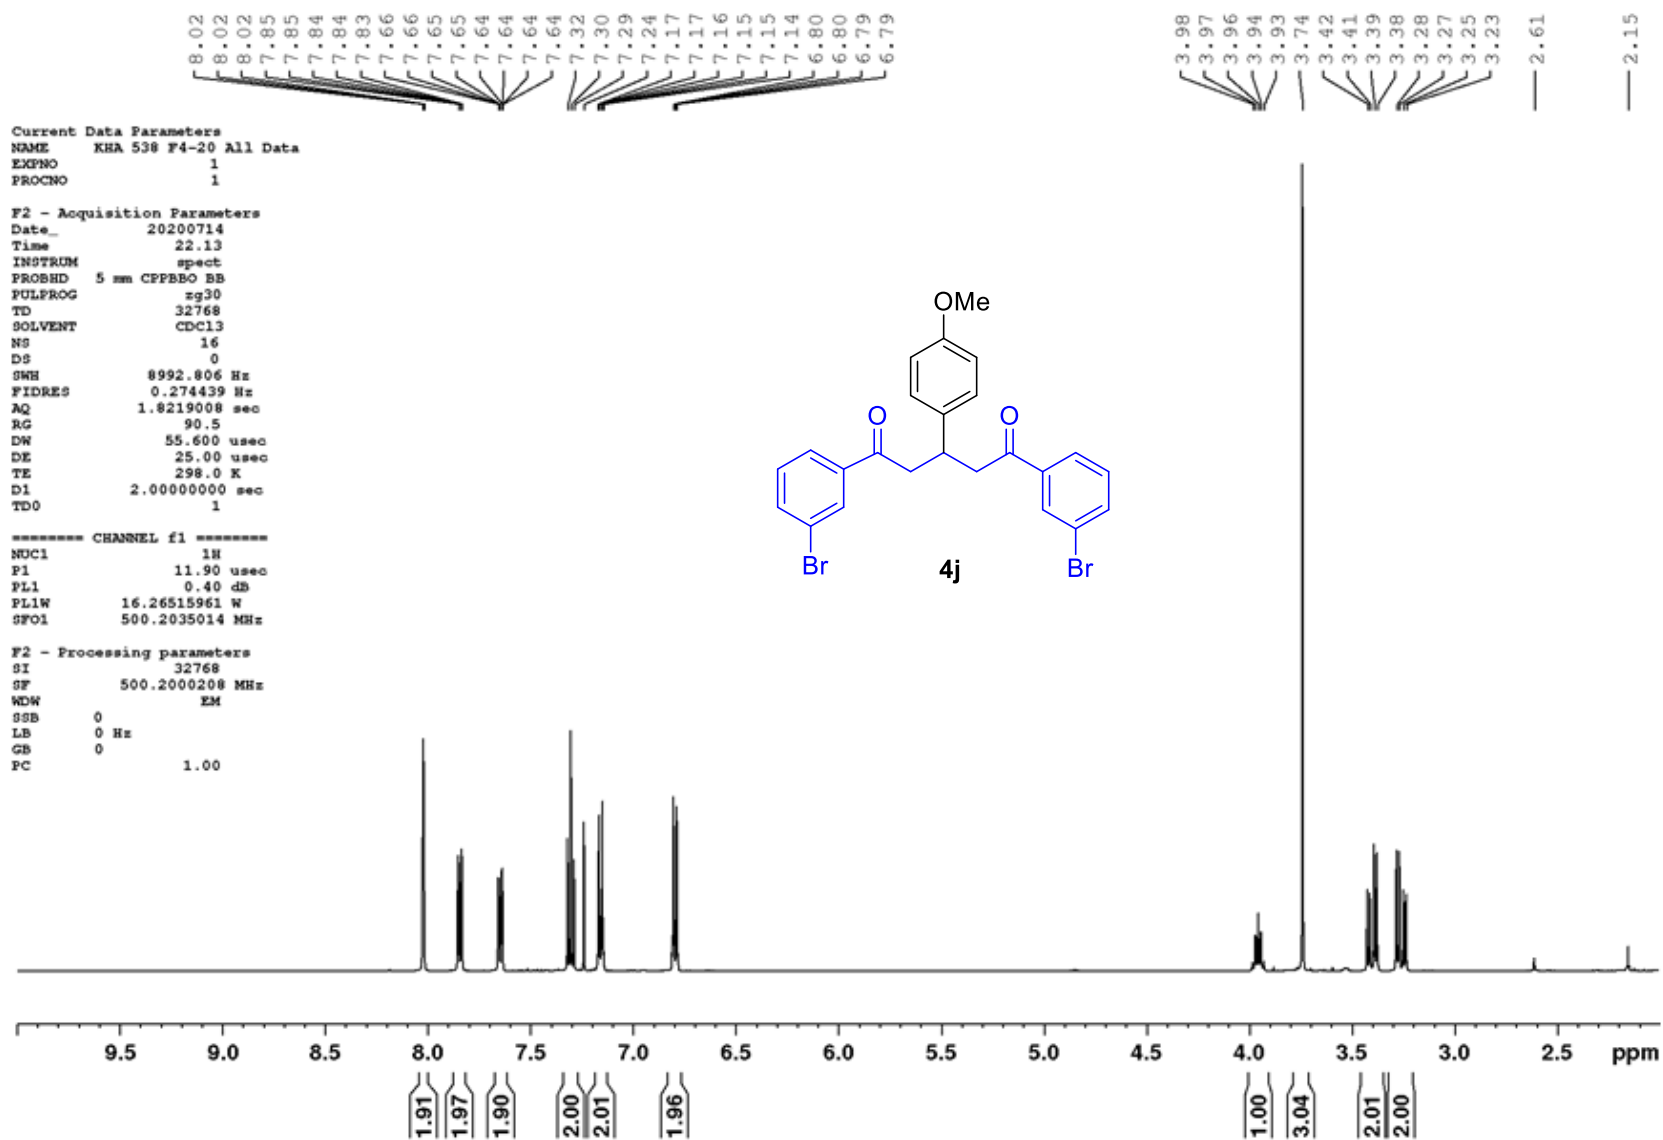

Figure S64.  $^1\text{H}$  NMR spectrum of compound **4j** (500 MHz,  $\text{CDCl}_3$ , 25  $^\circ\text{C}$ )

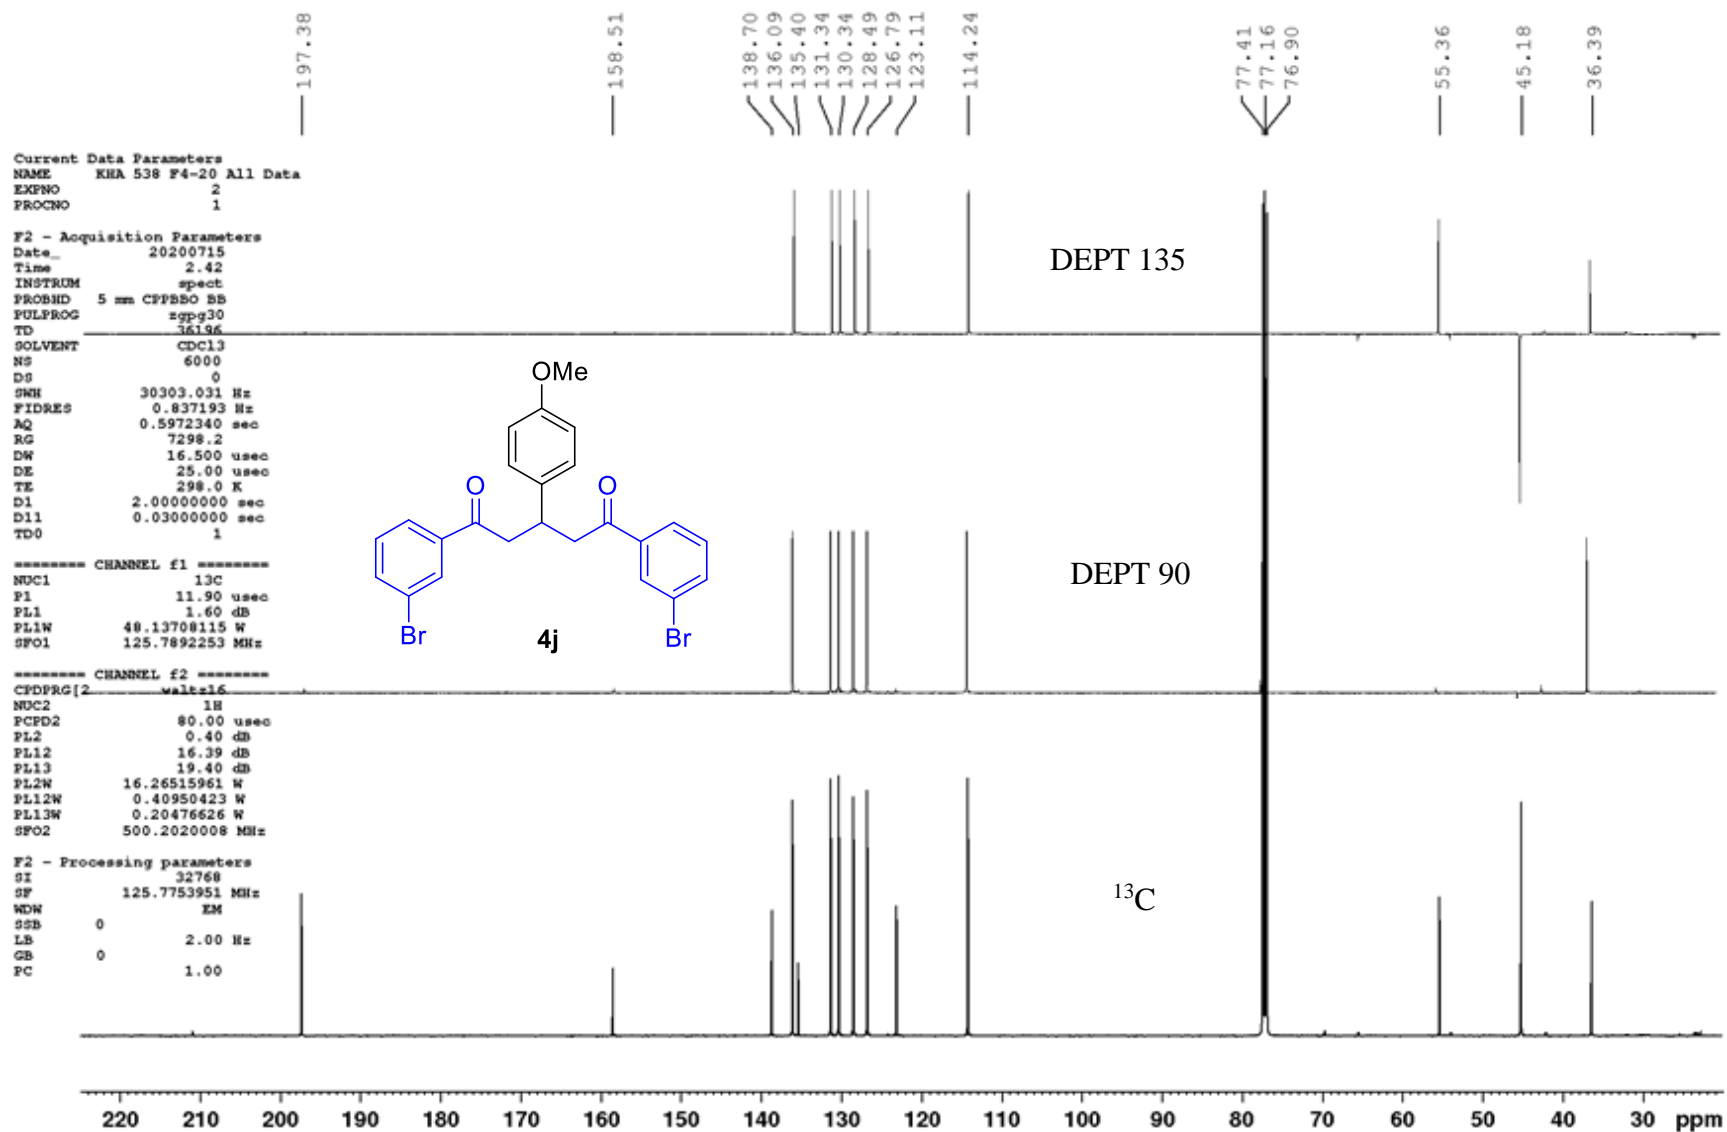

Figure S65. <sup>13</sup>C NMR spectrum of compound **4j** (125 MHz, CDCl<sub>3</sub>, 25 °C)

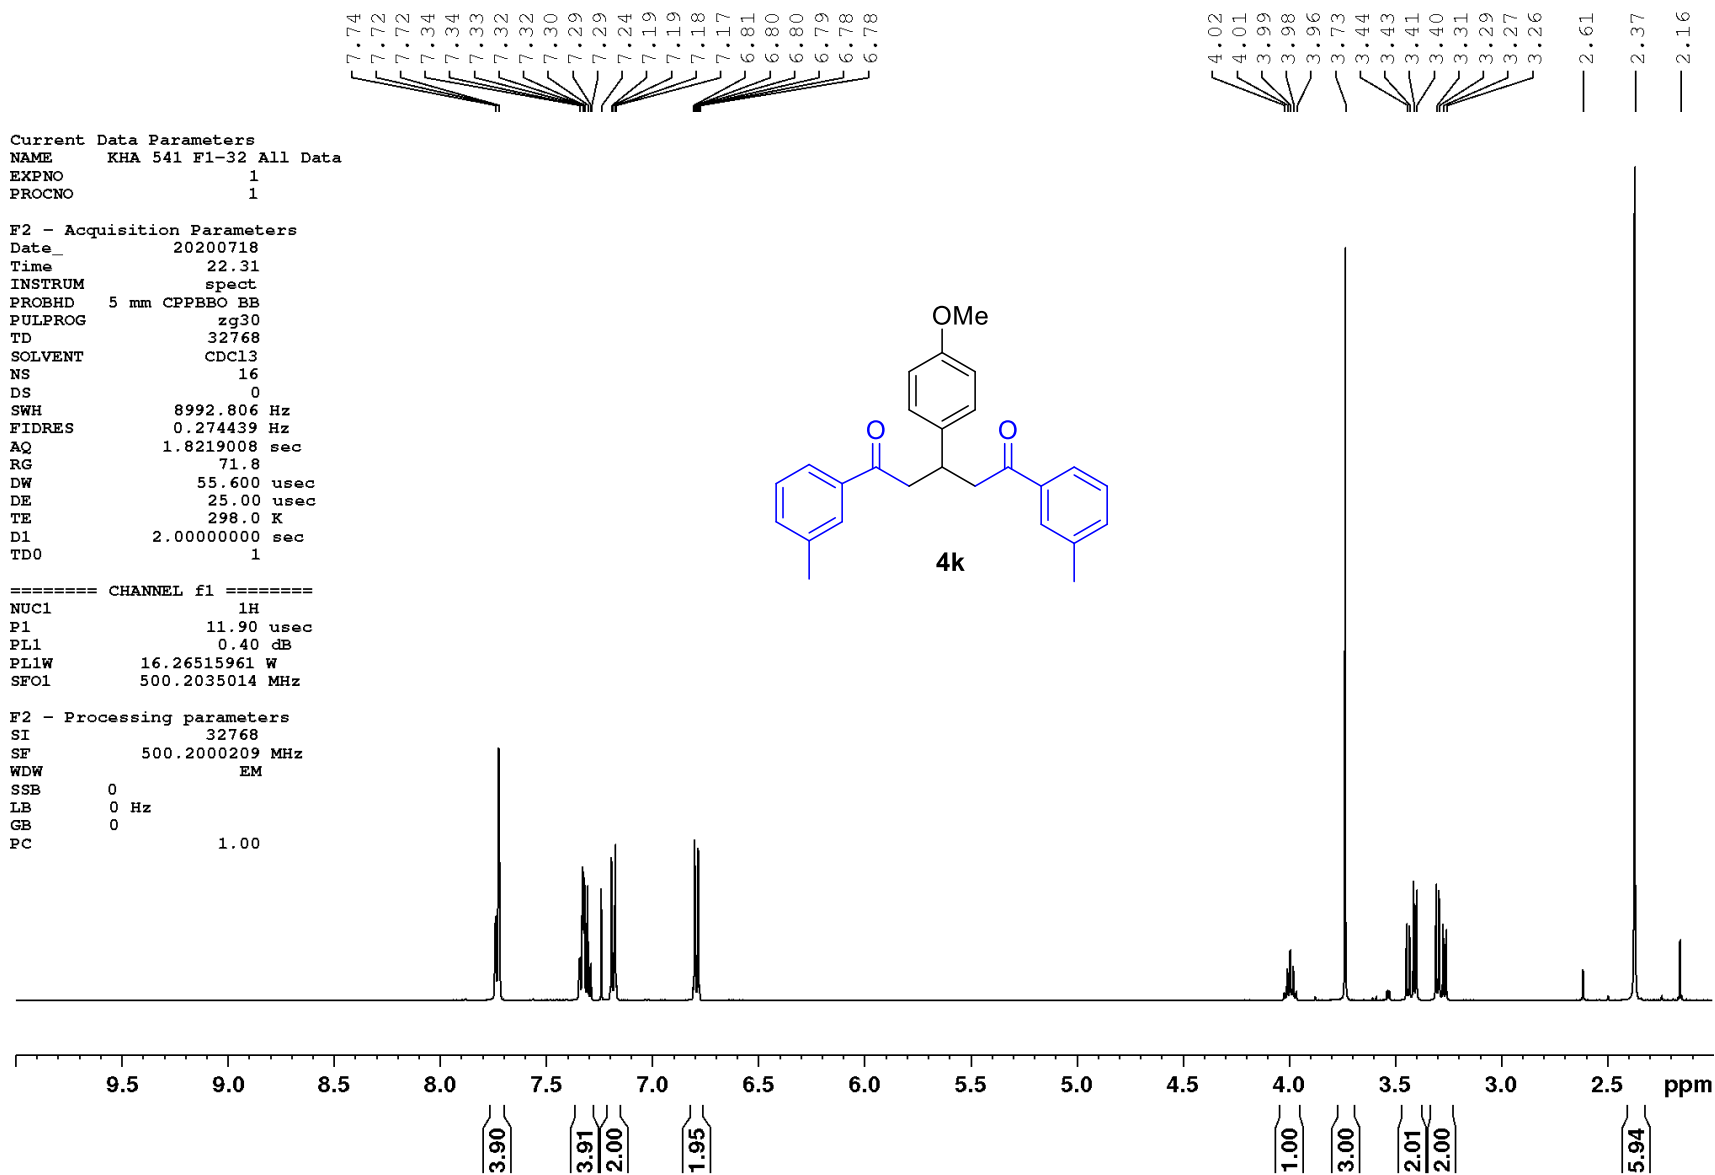

Figure S66. <sup>1</sup>H NMR spectrum of compound **4k** (500 MHz, CDCl<sub>3</sub>, 25 °C)

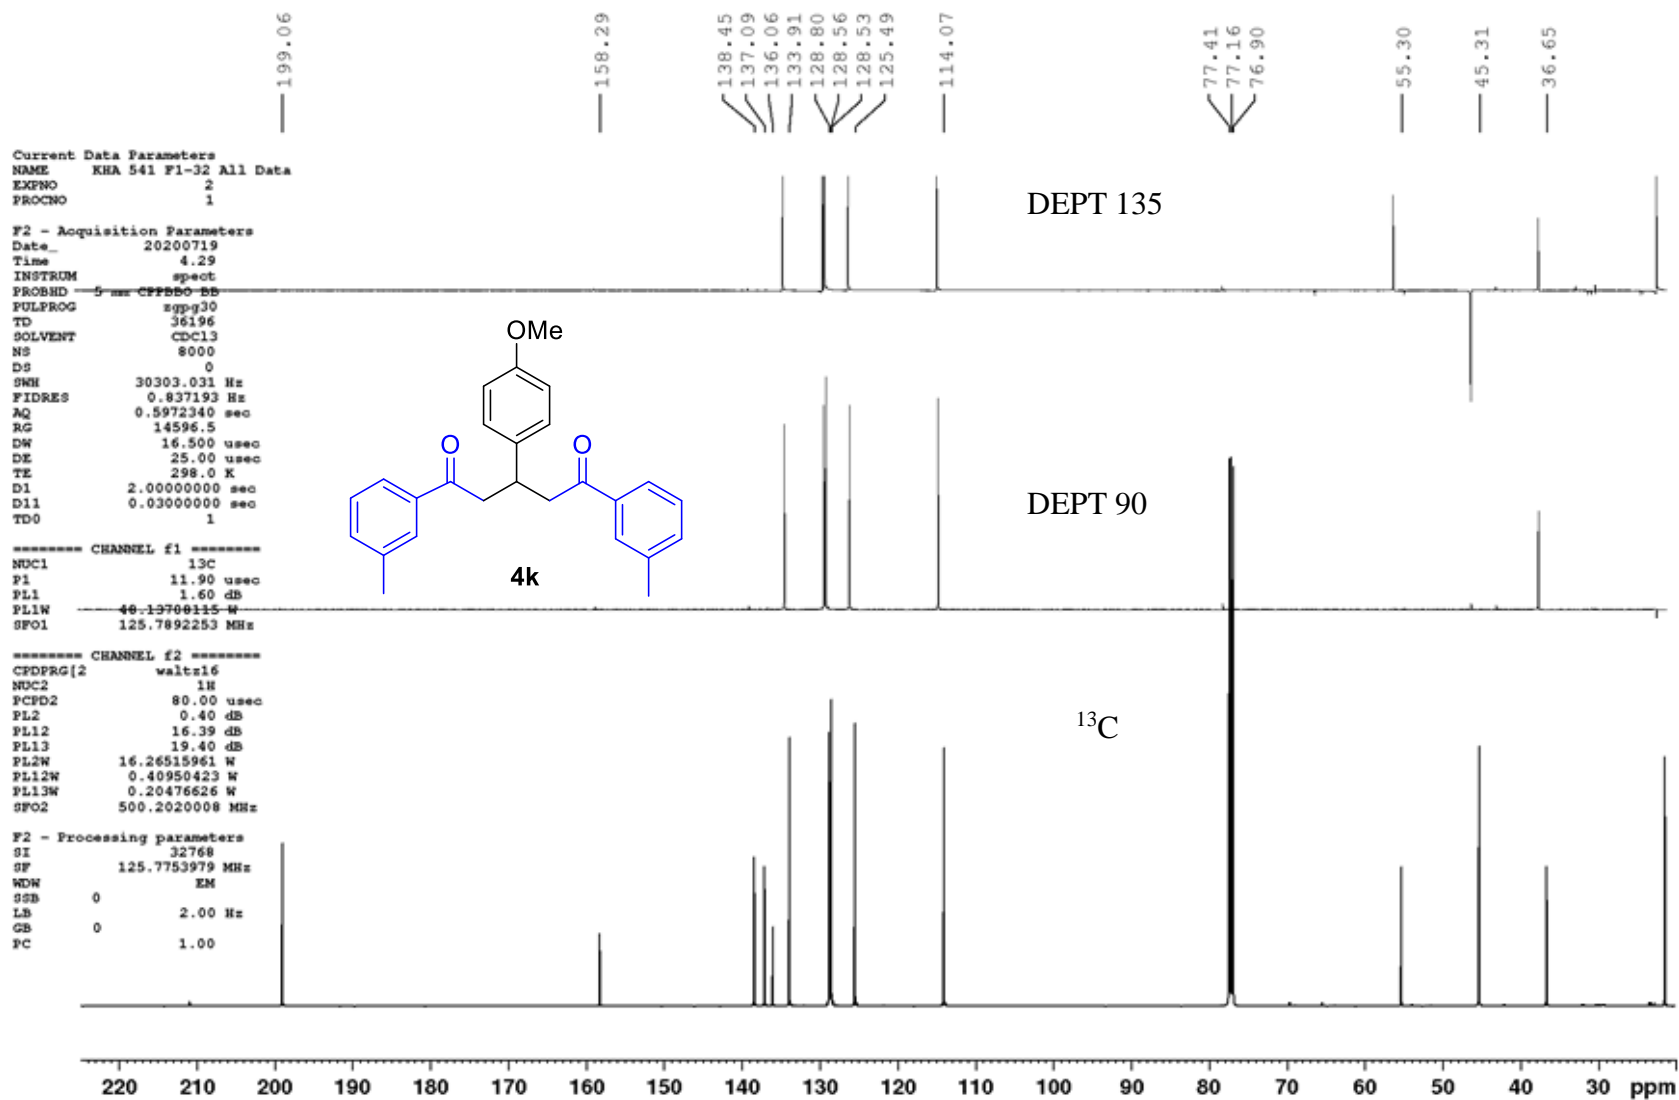

Figure S67. <sup>13</sup>C NMR spectrum of compound **4k** (125 MHz, CDCl<sub>3</sub>, 25 °C)

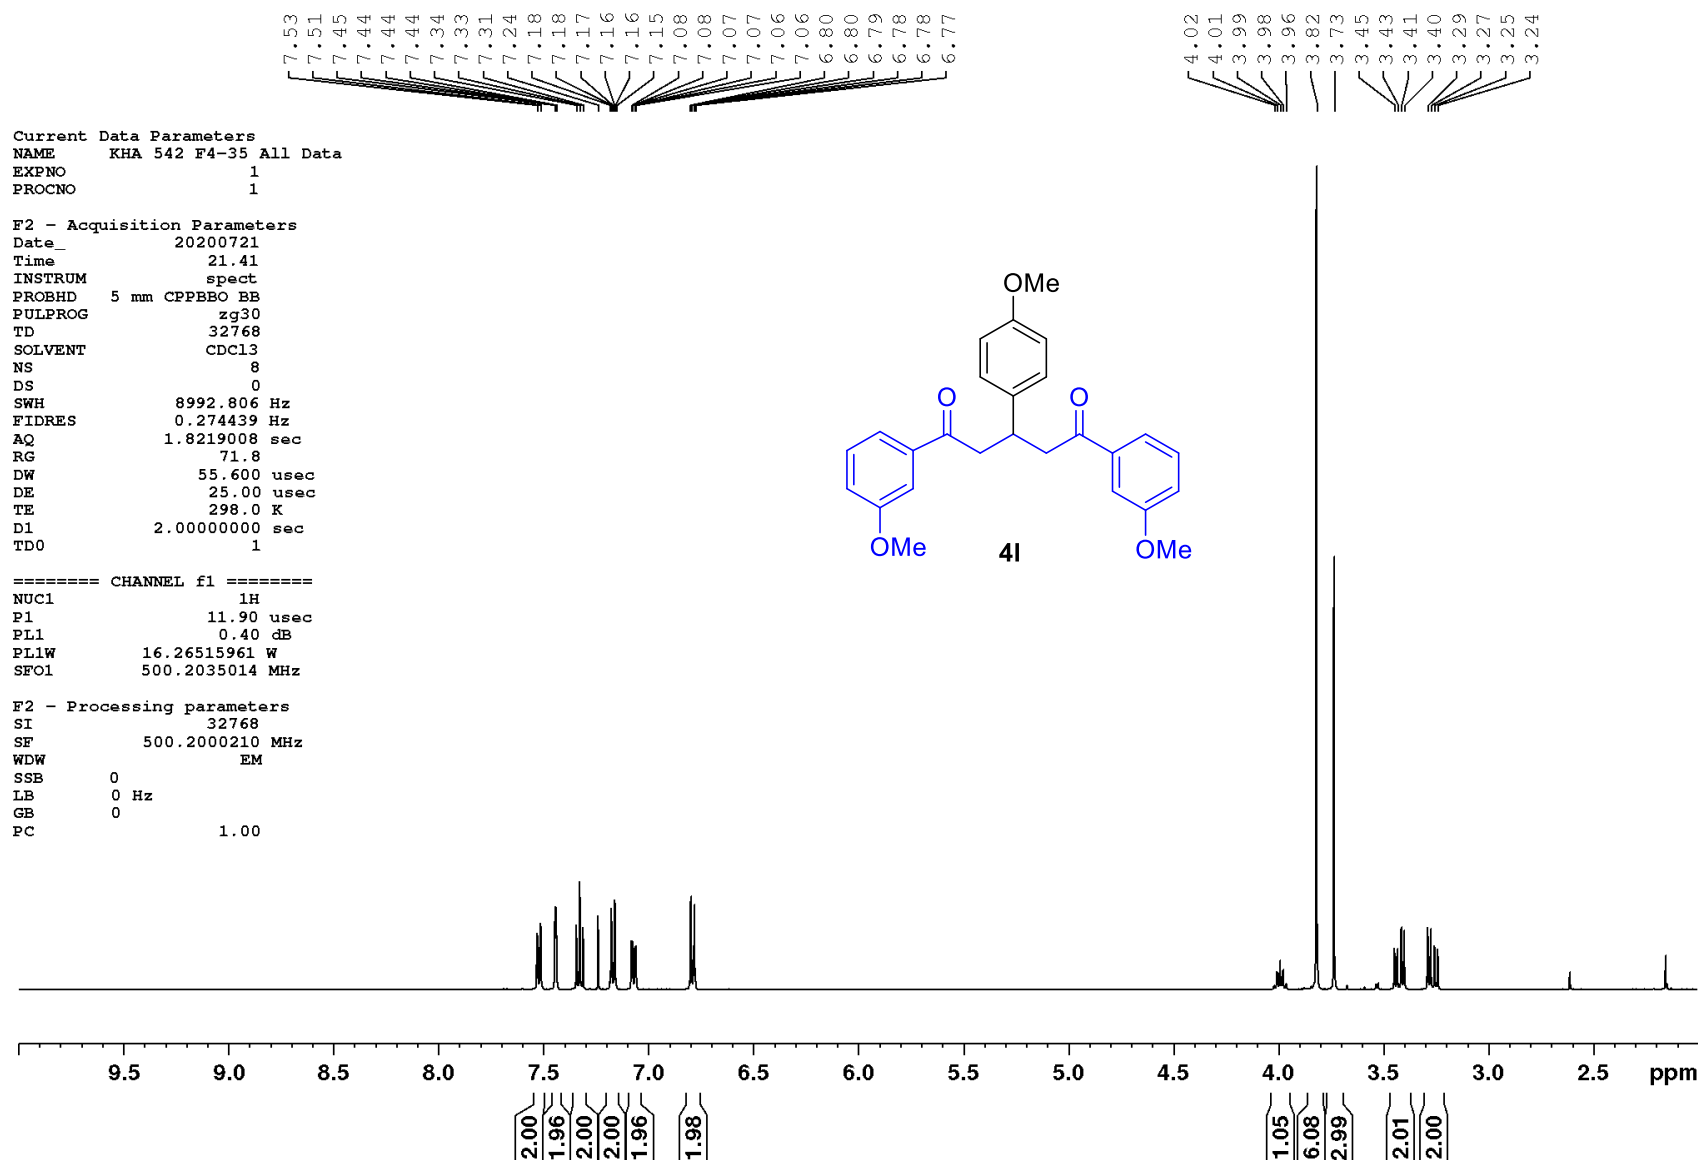

Figure S68. <sup>1</sup>H NMR spectrum of compound **41** (500 MHz, CDCl<sub>3</sub>, 25 °C)

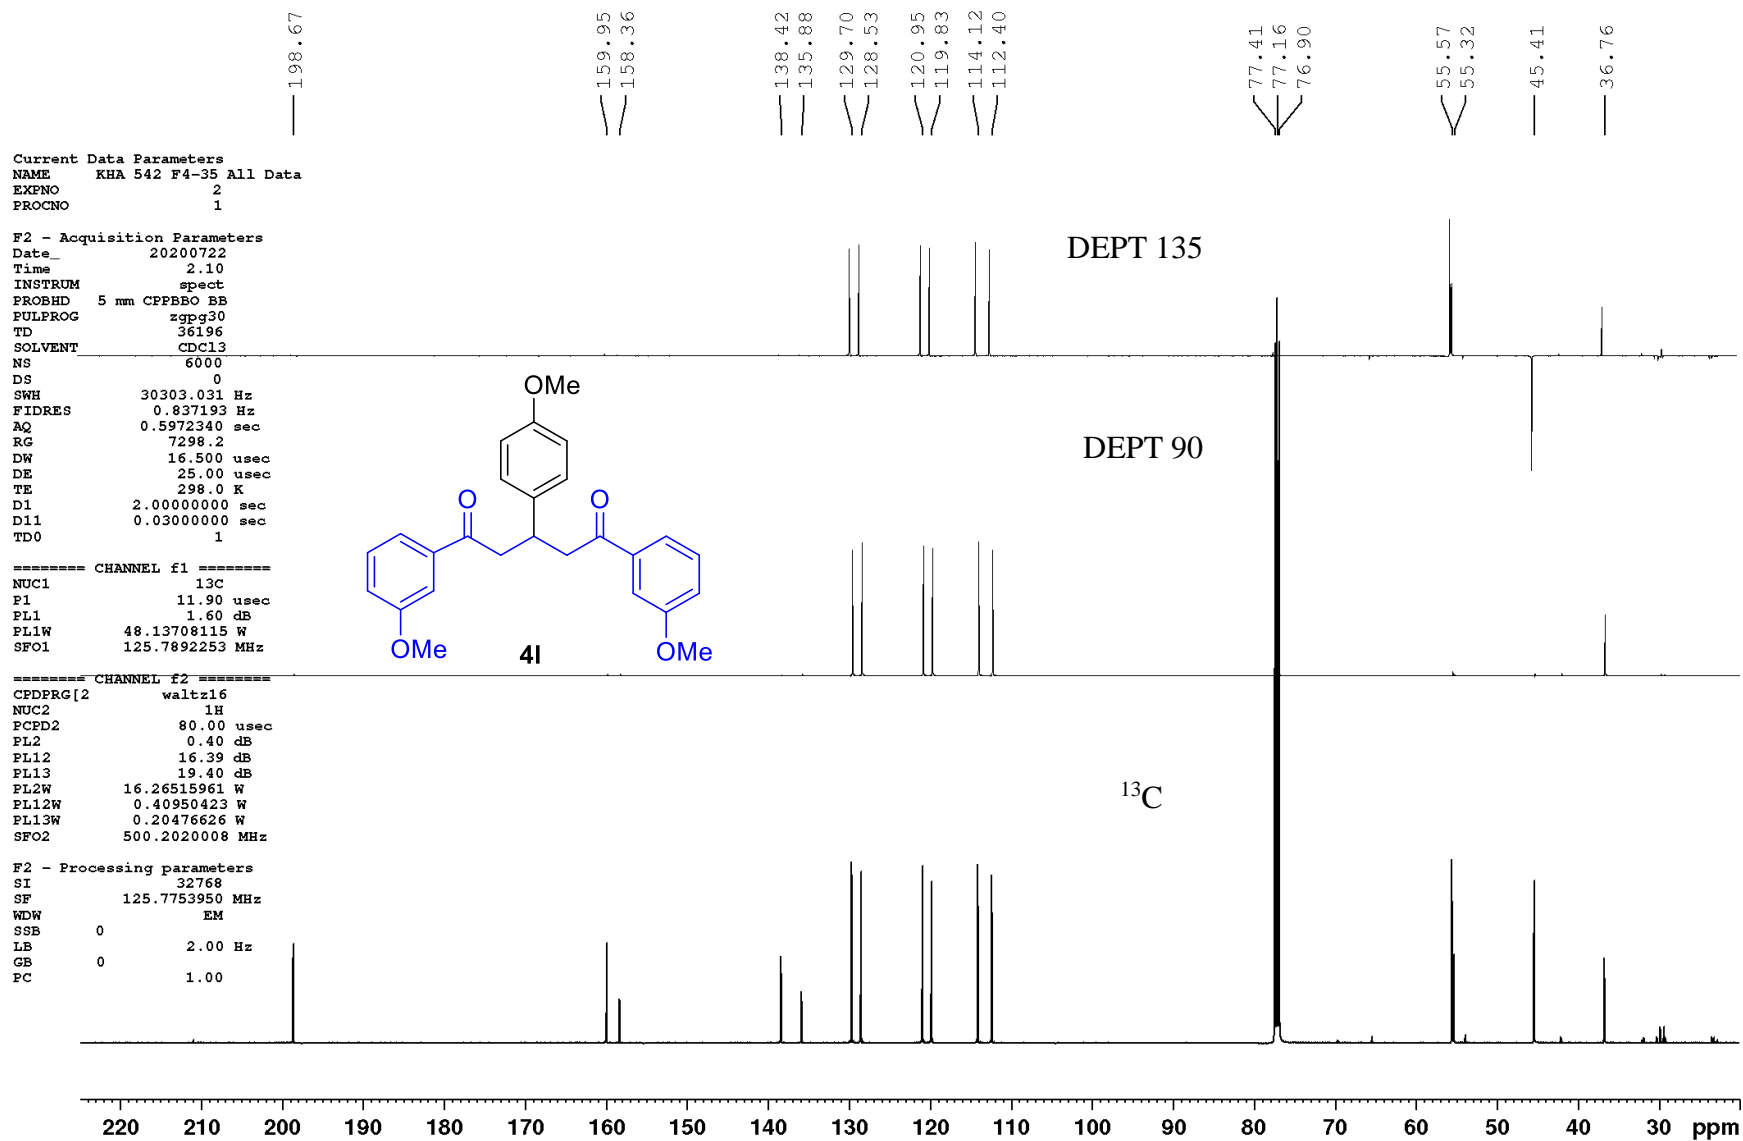

Figure S69. <sup>13</sup>C NMR spectrum of compound **41** (125 MHz, CDCl<sub>3</sub>, 25 °C)

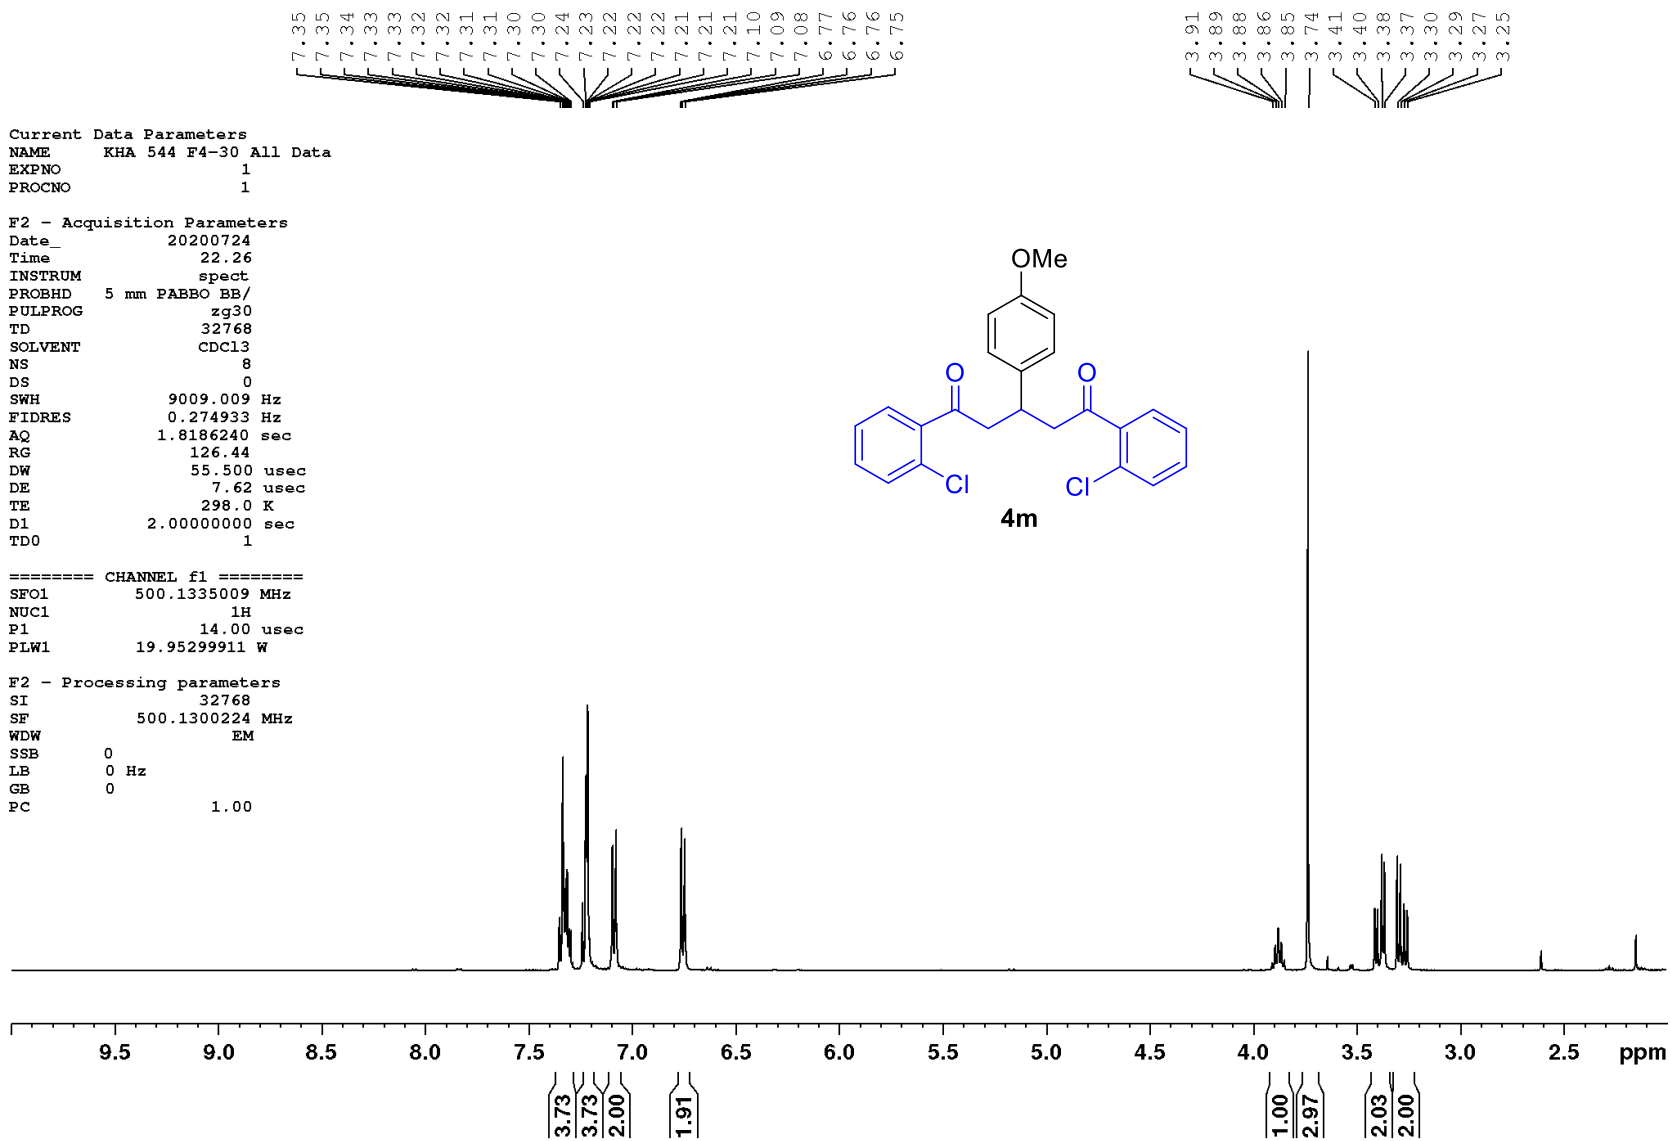

Figure S70. <sup>1</sup>H NMR spectrum of compound **4m** (500 MHz, CDCl<sub>3</sub>, 25 °C)



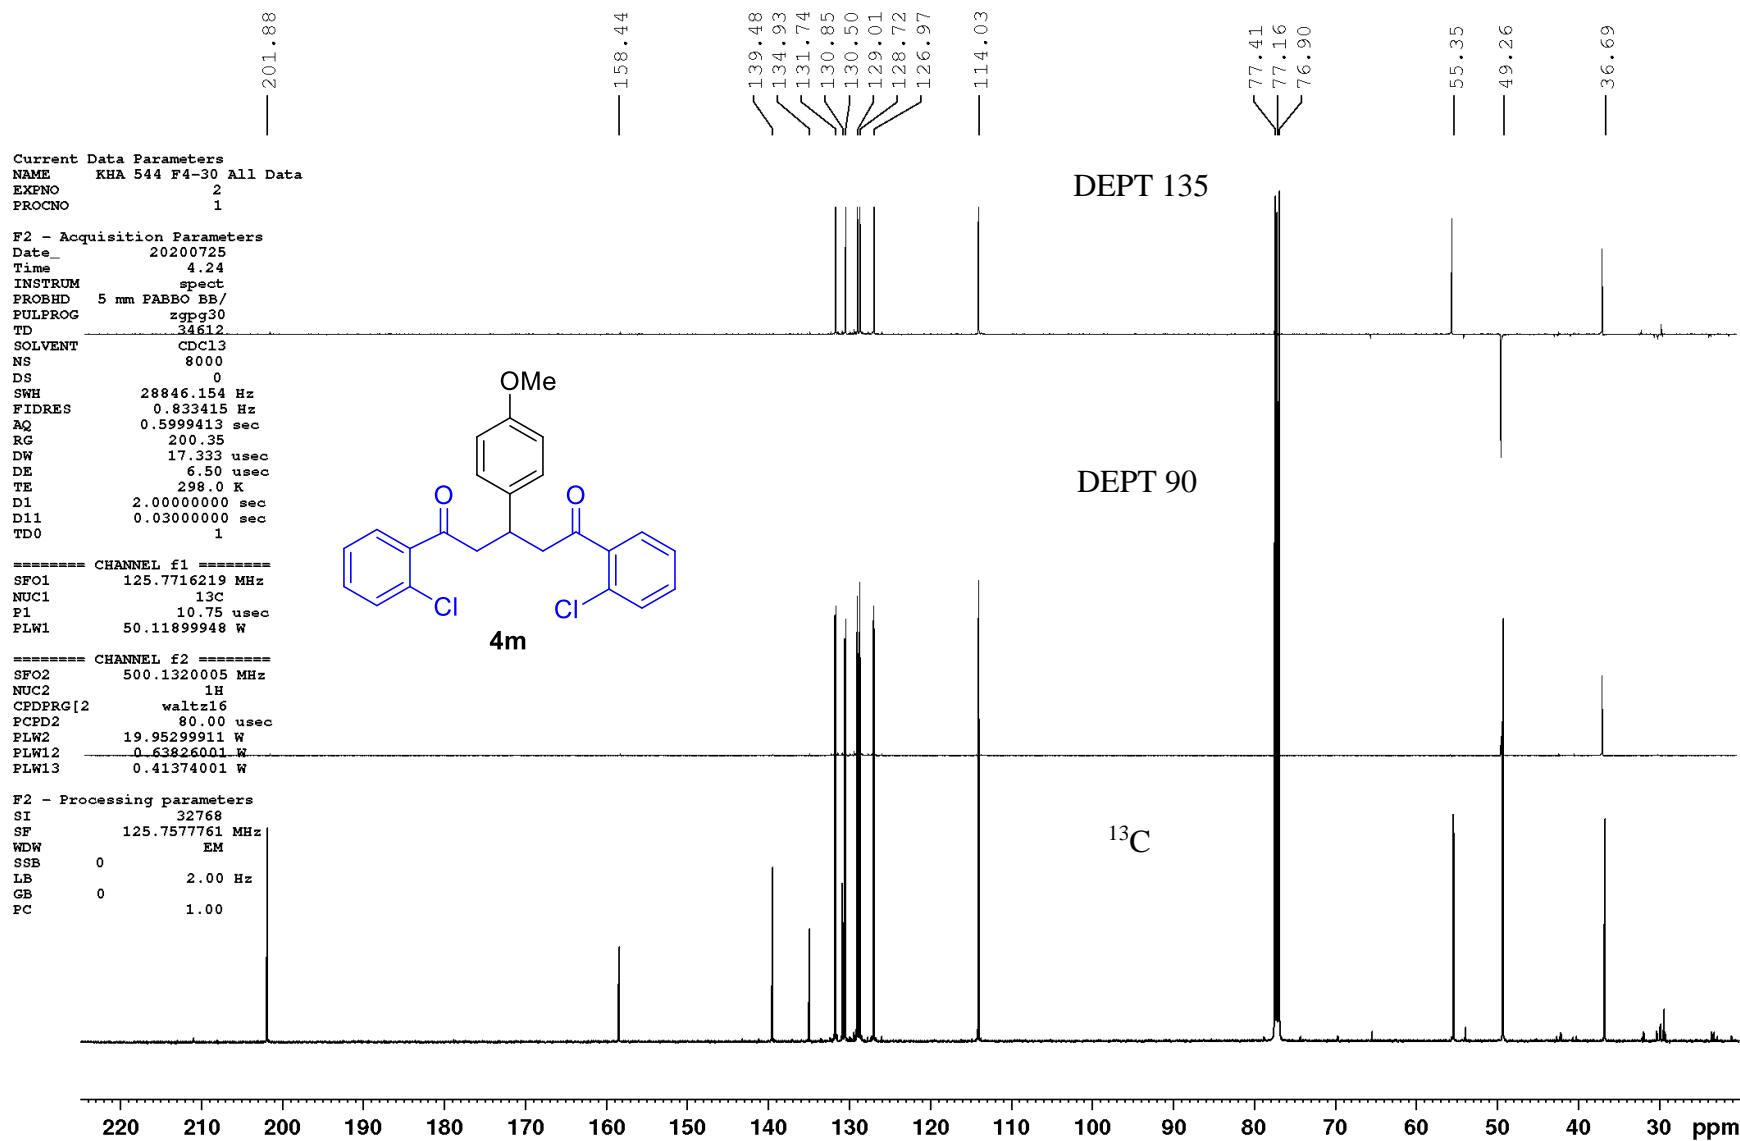

Figure S71. <sup>13</sup>C NMR spectrum of compound **4m** (125 MHz, CDCl<sub>3</sub>, 25 °C)

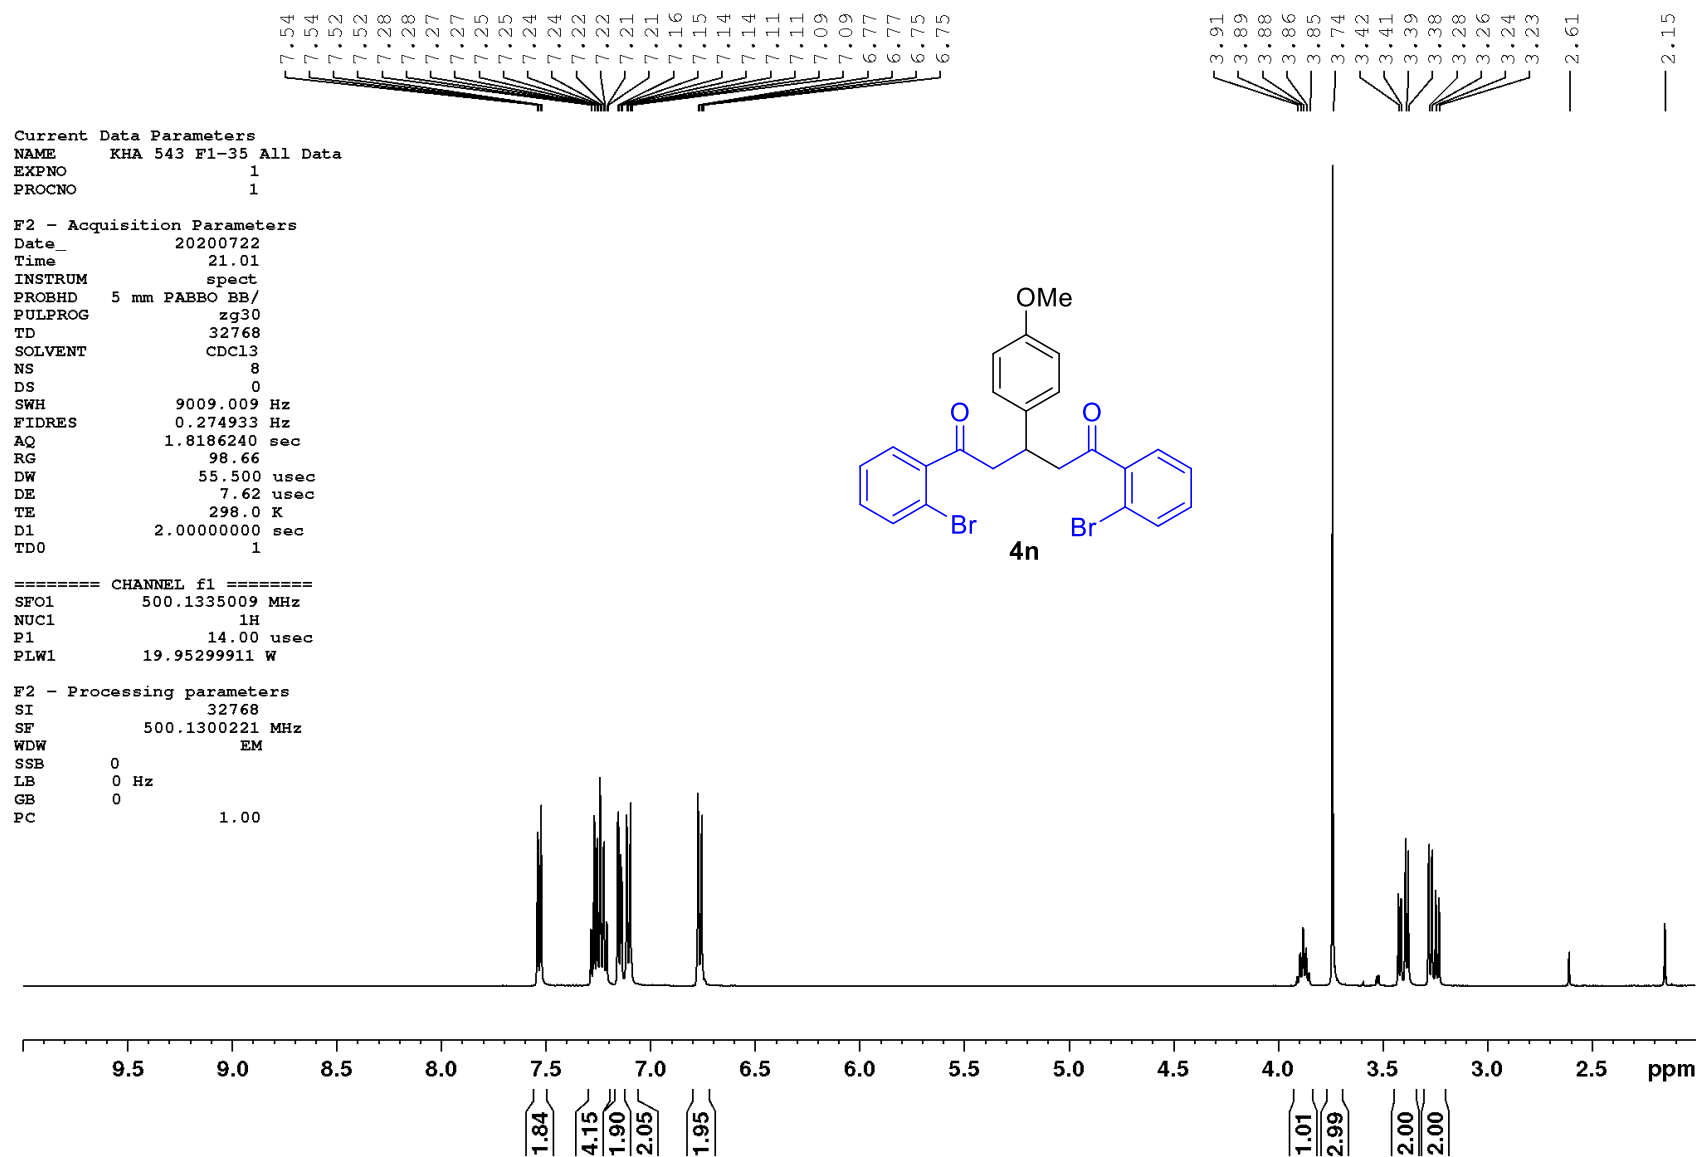

Figure S72. <sup>1</sup>H NMR spectrum of compound **4n** (500 MHz, CDCl<sub>3</sub>, 25 °C)

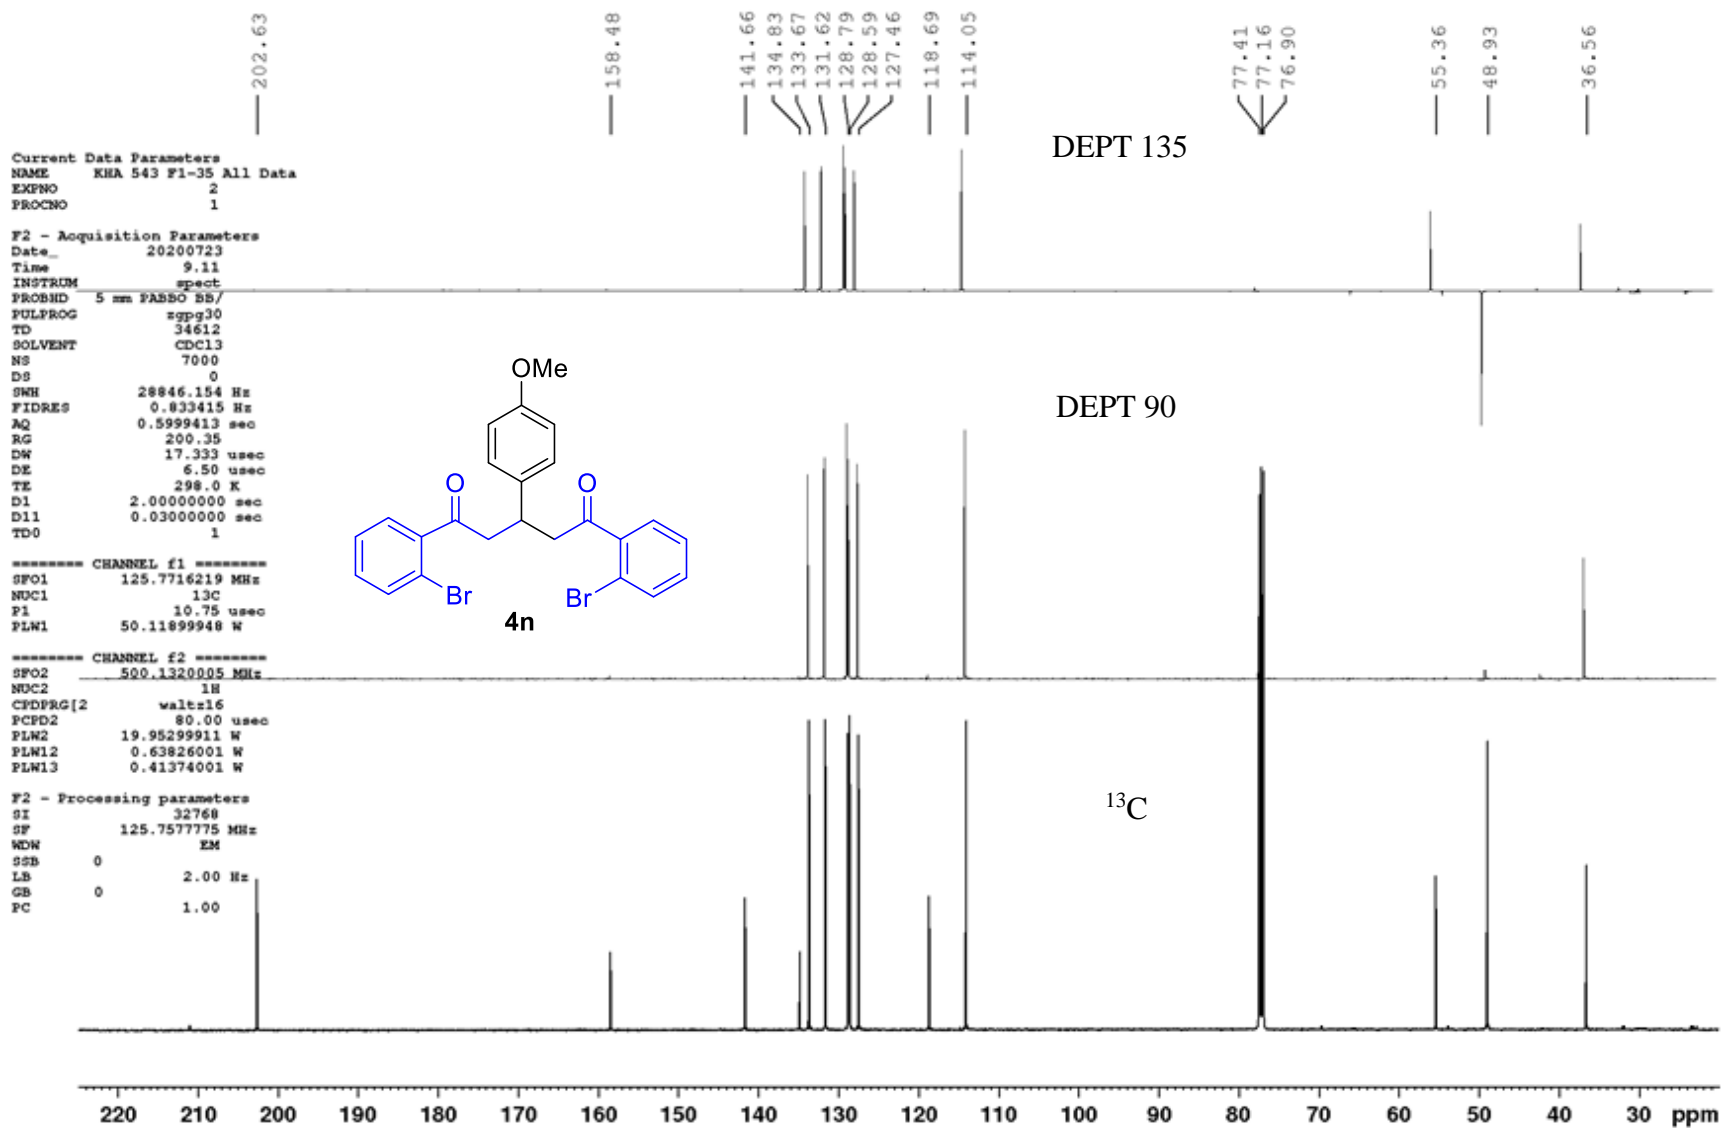

Figure S73. <sup>13</sup>C NMR spectrum of compound **4n** (125 MHz, CDCl<sub>3</sub>, 25 °C)

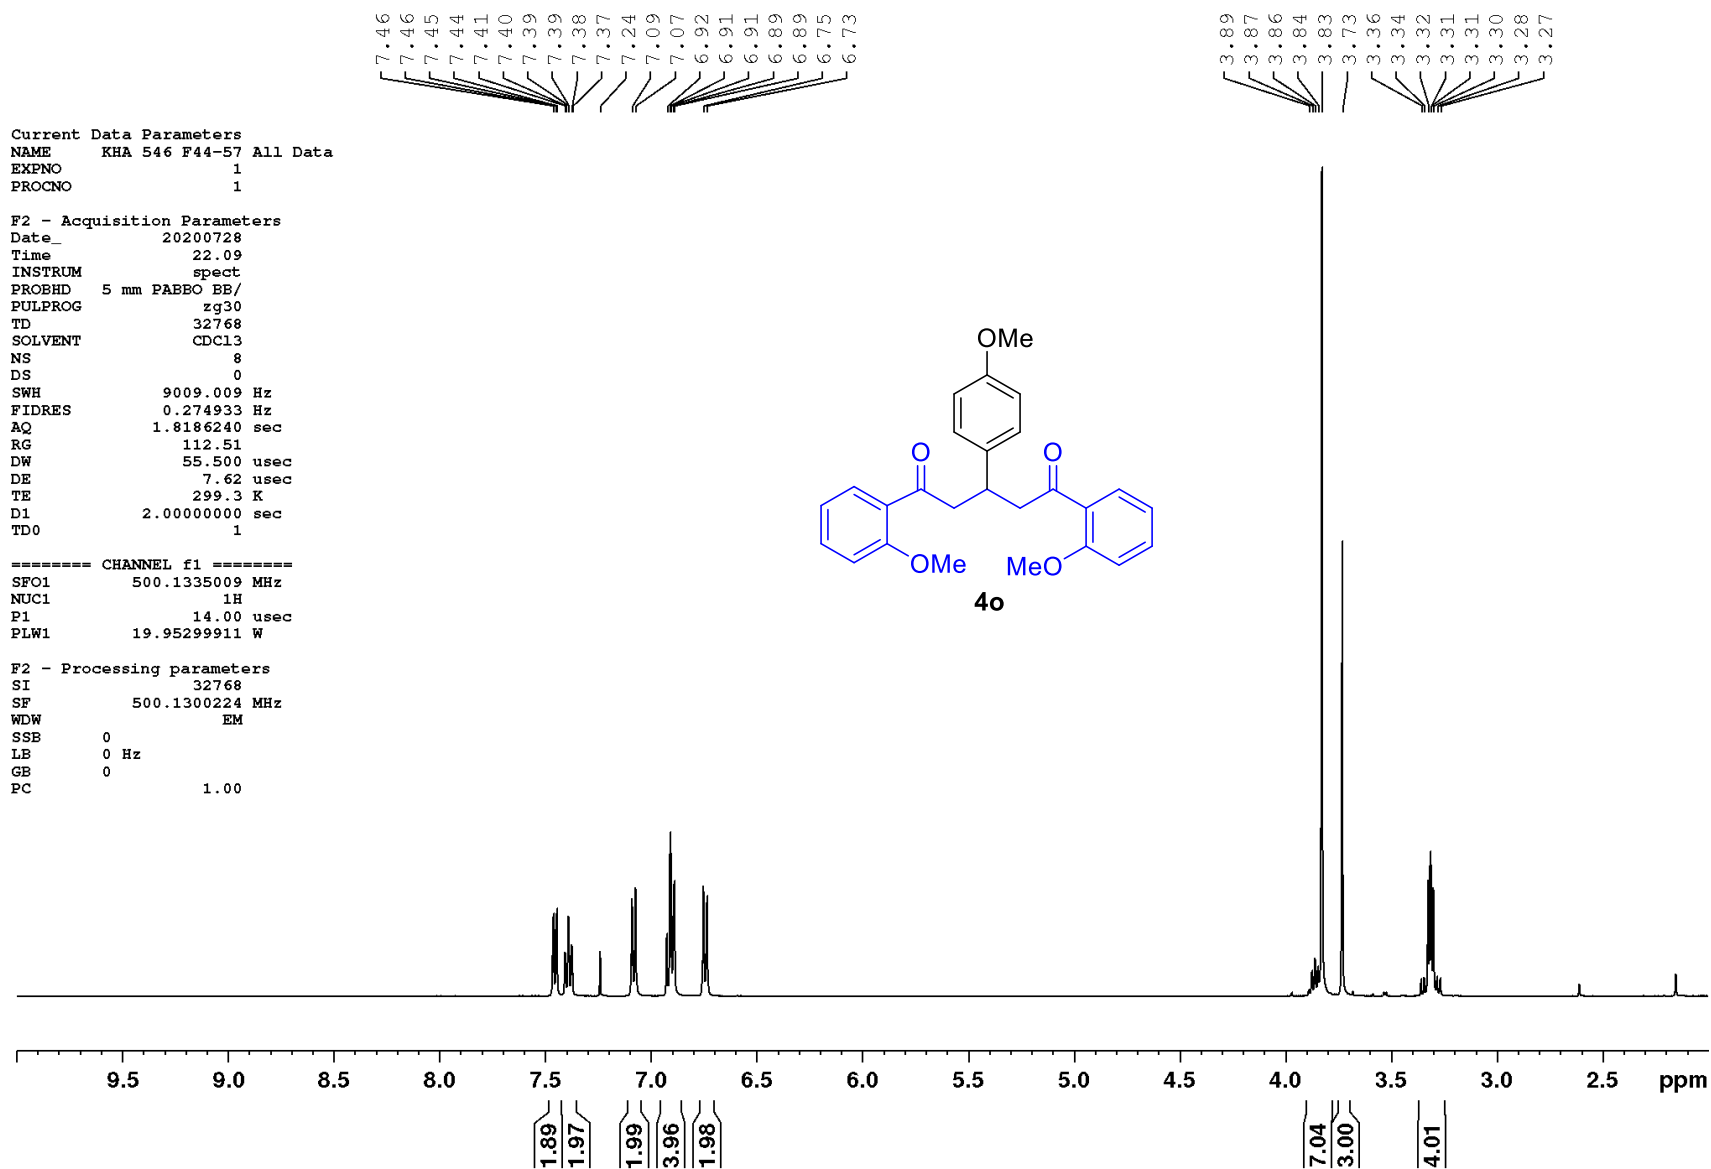

Figure S74. <sup>1</sup>H NMR spectrum of compound **4o** (500 MHz, CDCl<sub>3</sub>, 25 °C)

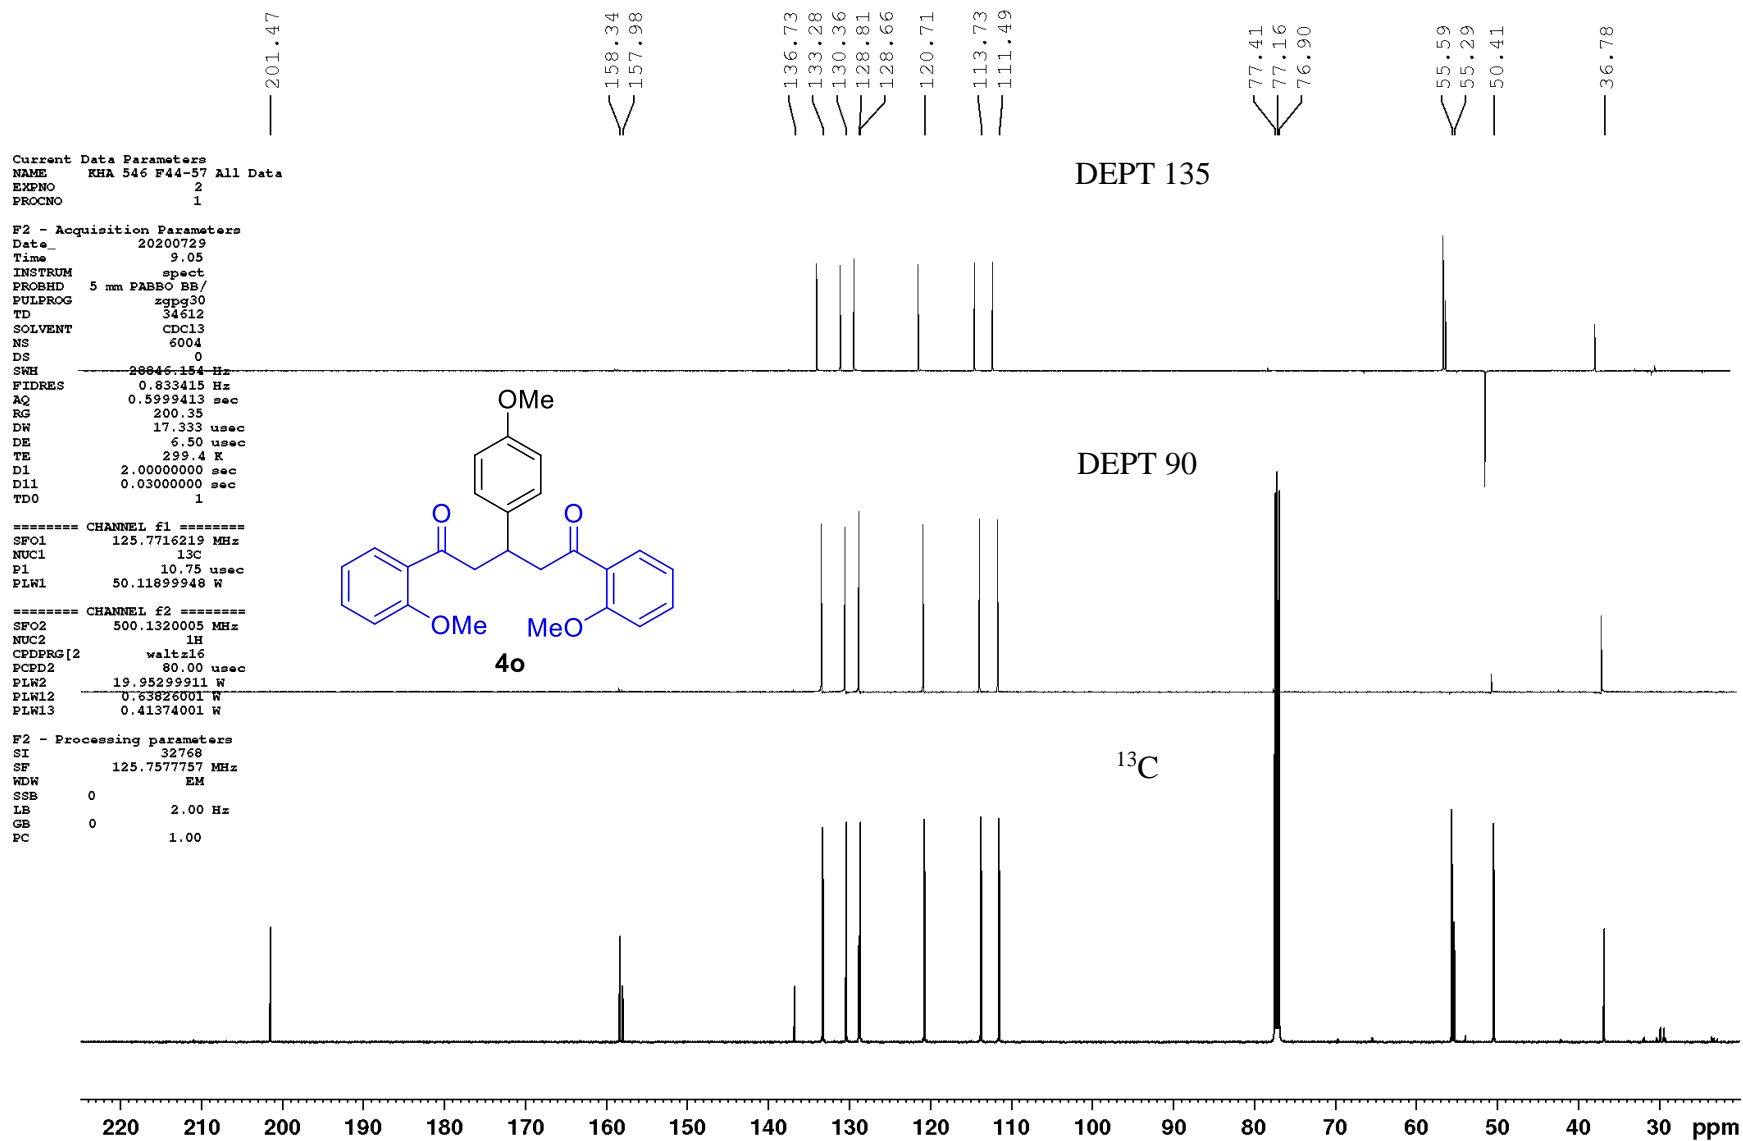

Figure S75. <sup>13</sup>C NMR spectrum of compound **4o** (125 MHz, CDCl<sub>3</sub>, 25 °C)

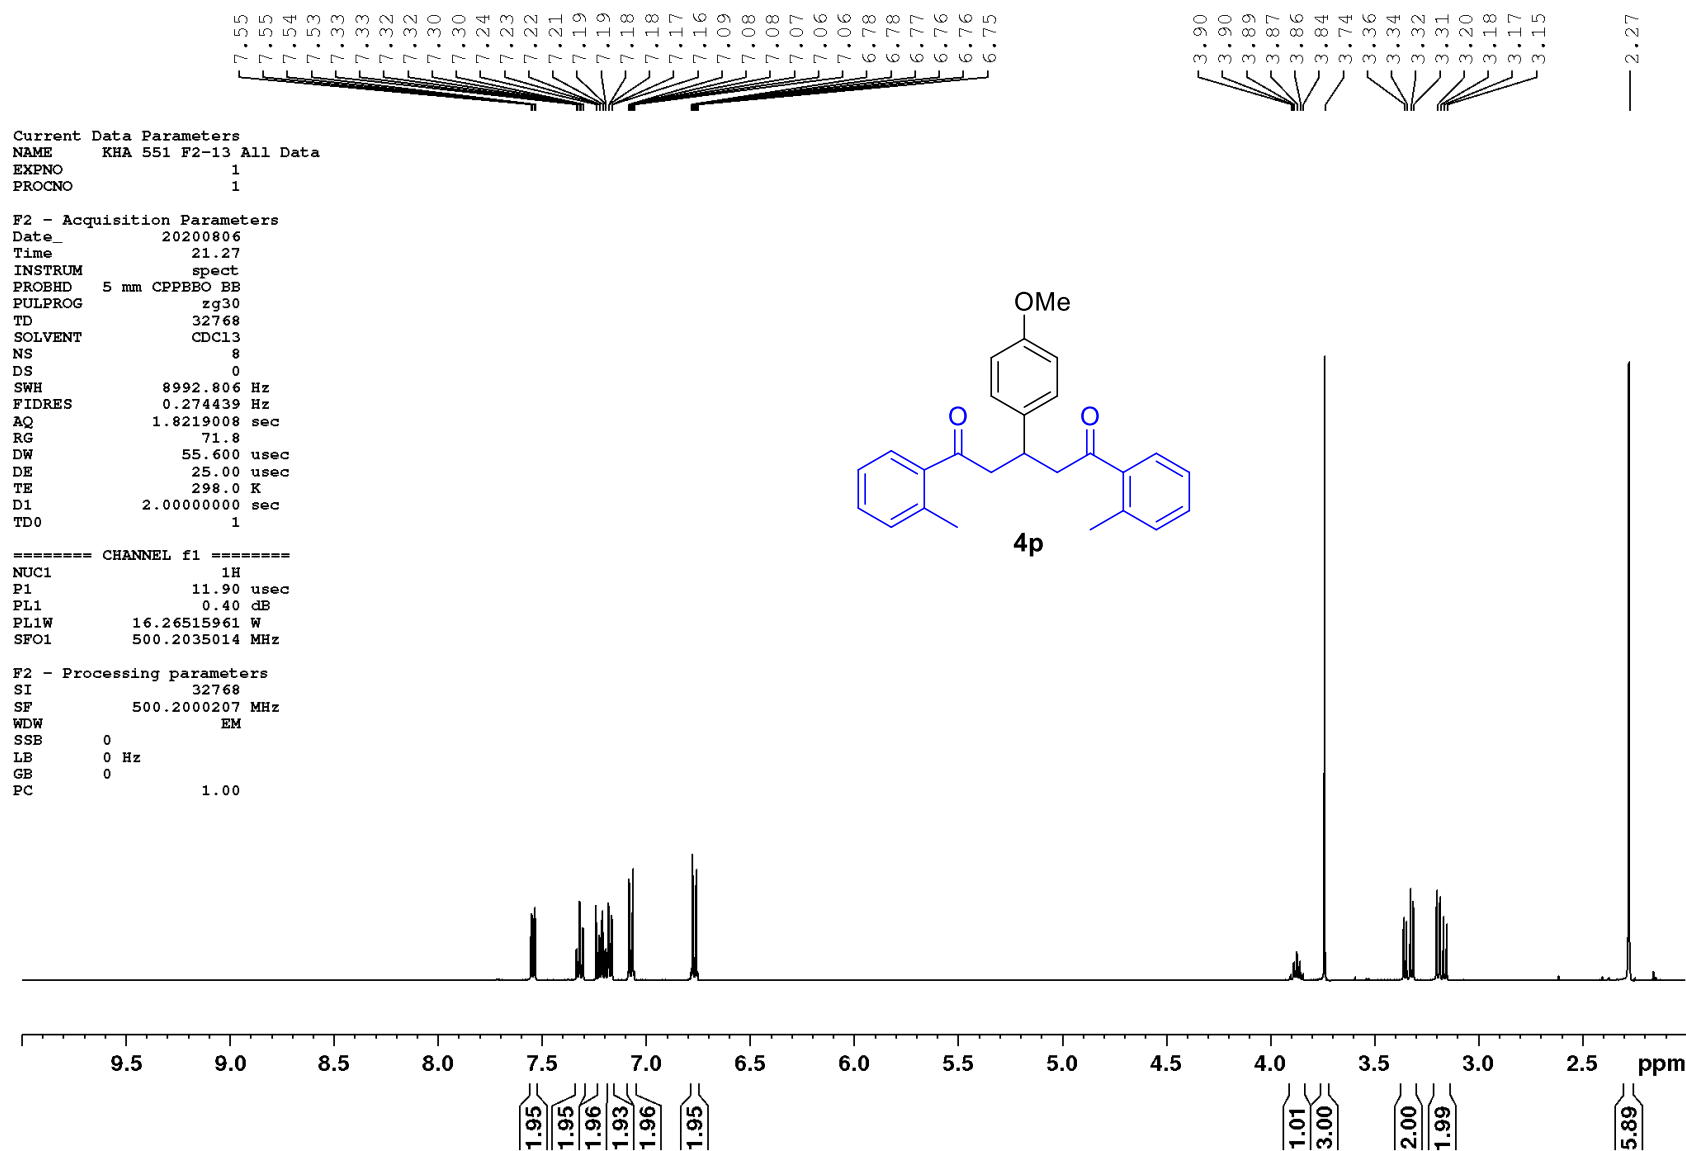

Figure S76. <sup>1</sup>H NMR spectrum of compound **4p** (500 MHz, CDCl<sub>3</sub>, 25 °C)

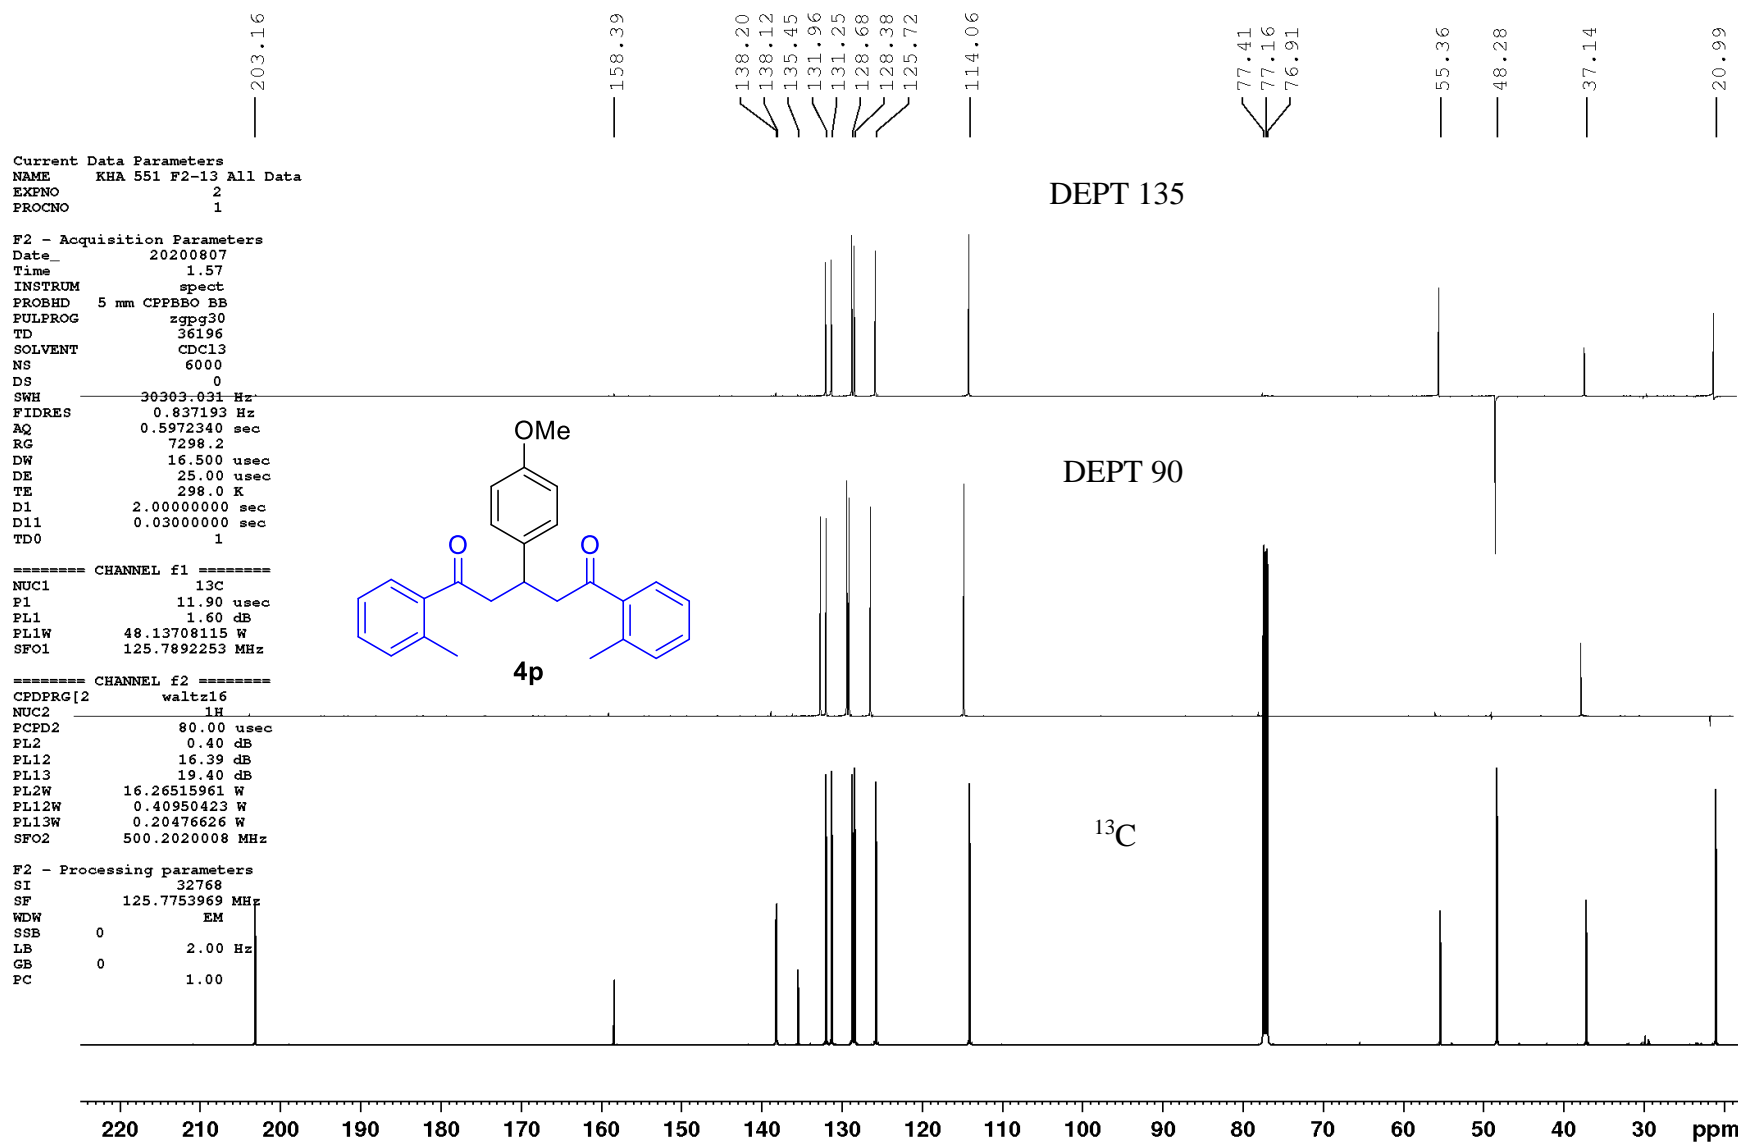

Figure S77. <sup>13</sup>C NMR spectrum of compound **4p** (125 MHz, CDCl<sub>3</sub>, 25 °C)

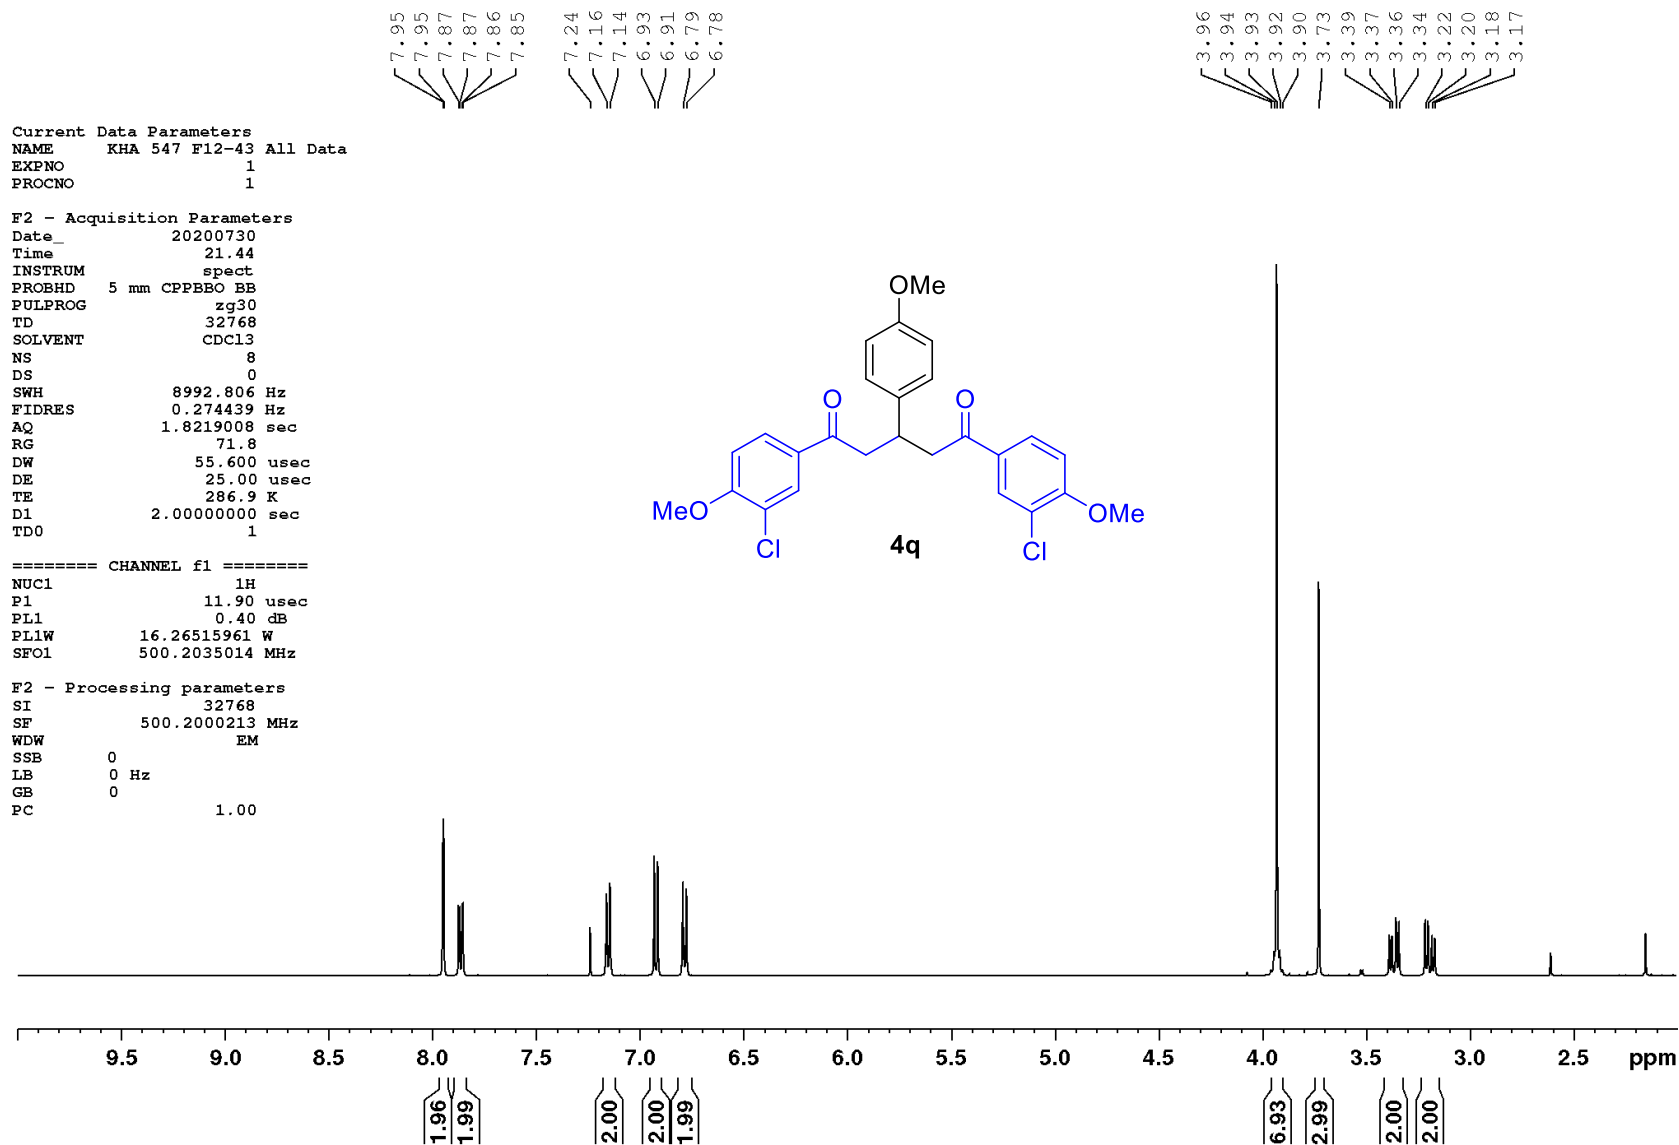

Figure S78. <sup>1</sup>H NMR spectrum of compound **4q** (500 MHz, CDCl<sub>3</sub>, 25 °C)



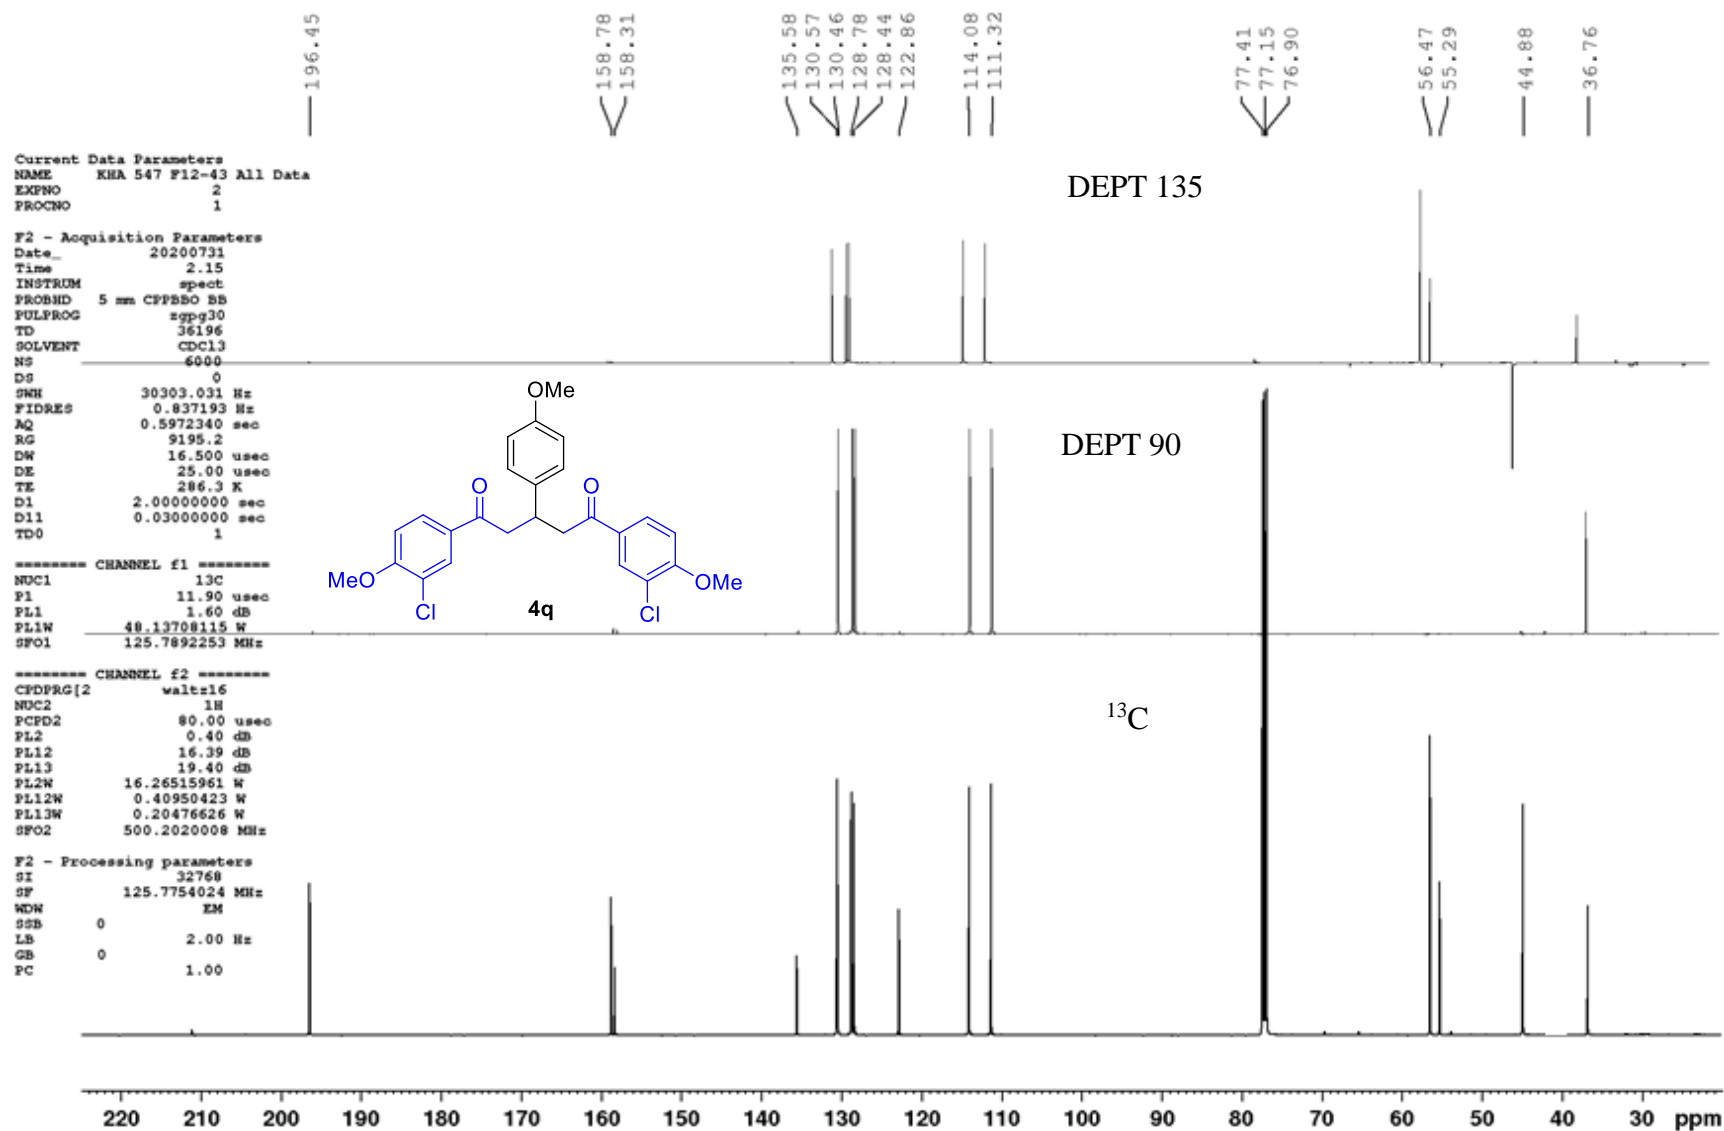

Figure S79. <sup>13</sup>C NMR spectrum of compound **4q** (125 MHz, CDCl<sub>3</sub>, 25 °C)

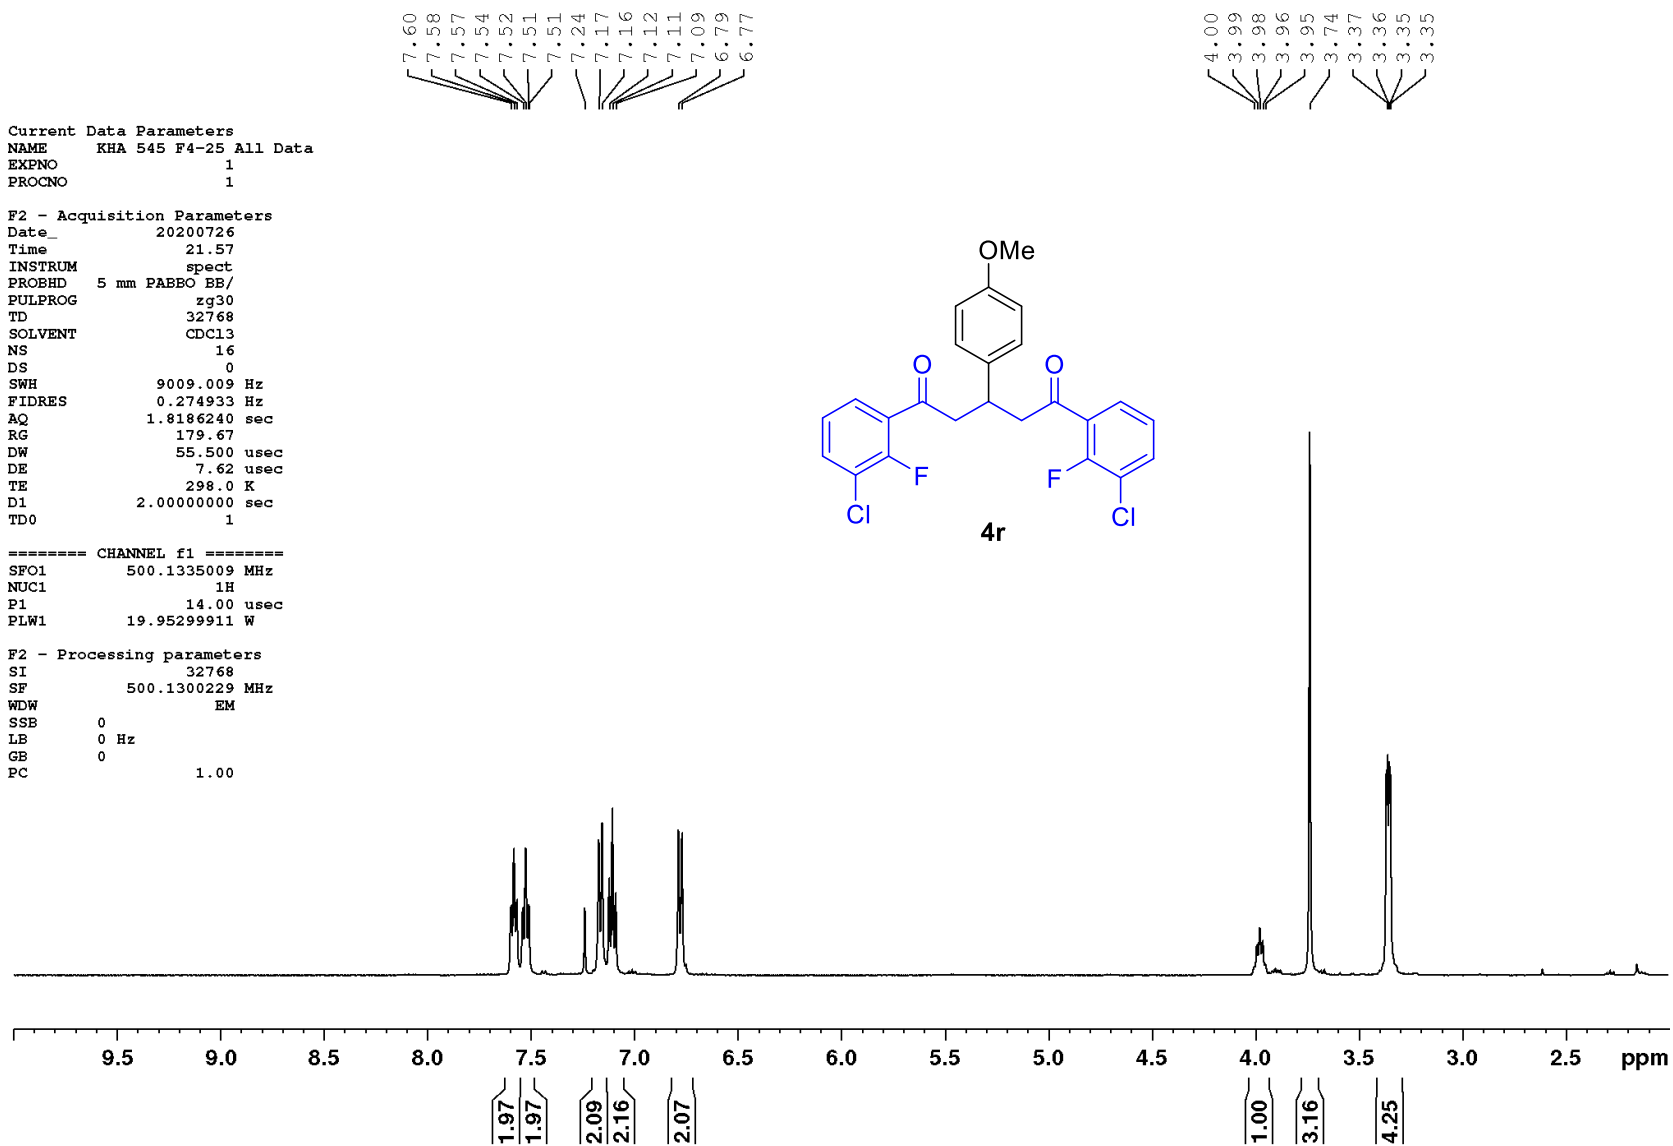

Figure S80. <sup>1</sup>H NMR spectrum of compound **4r** (500 MHz, CDCl<sub>3</sub>, 25 °C)

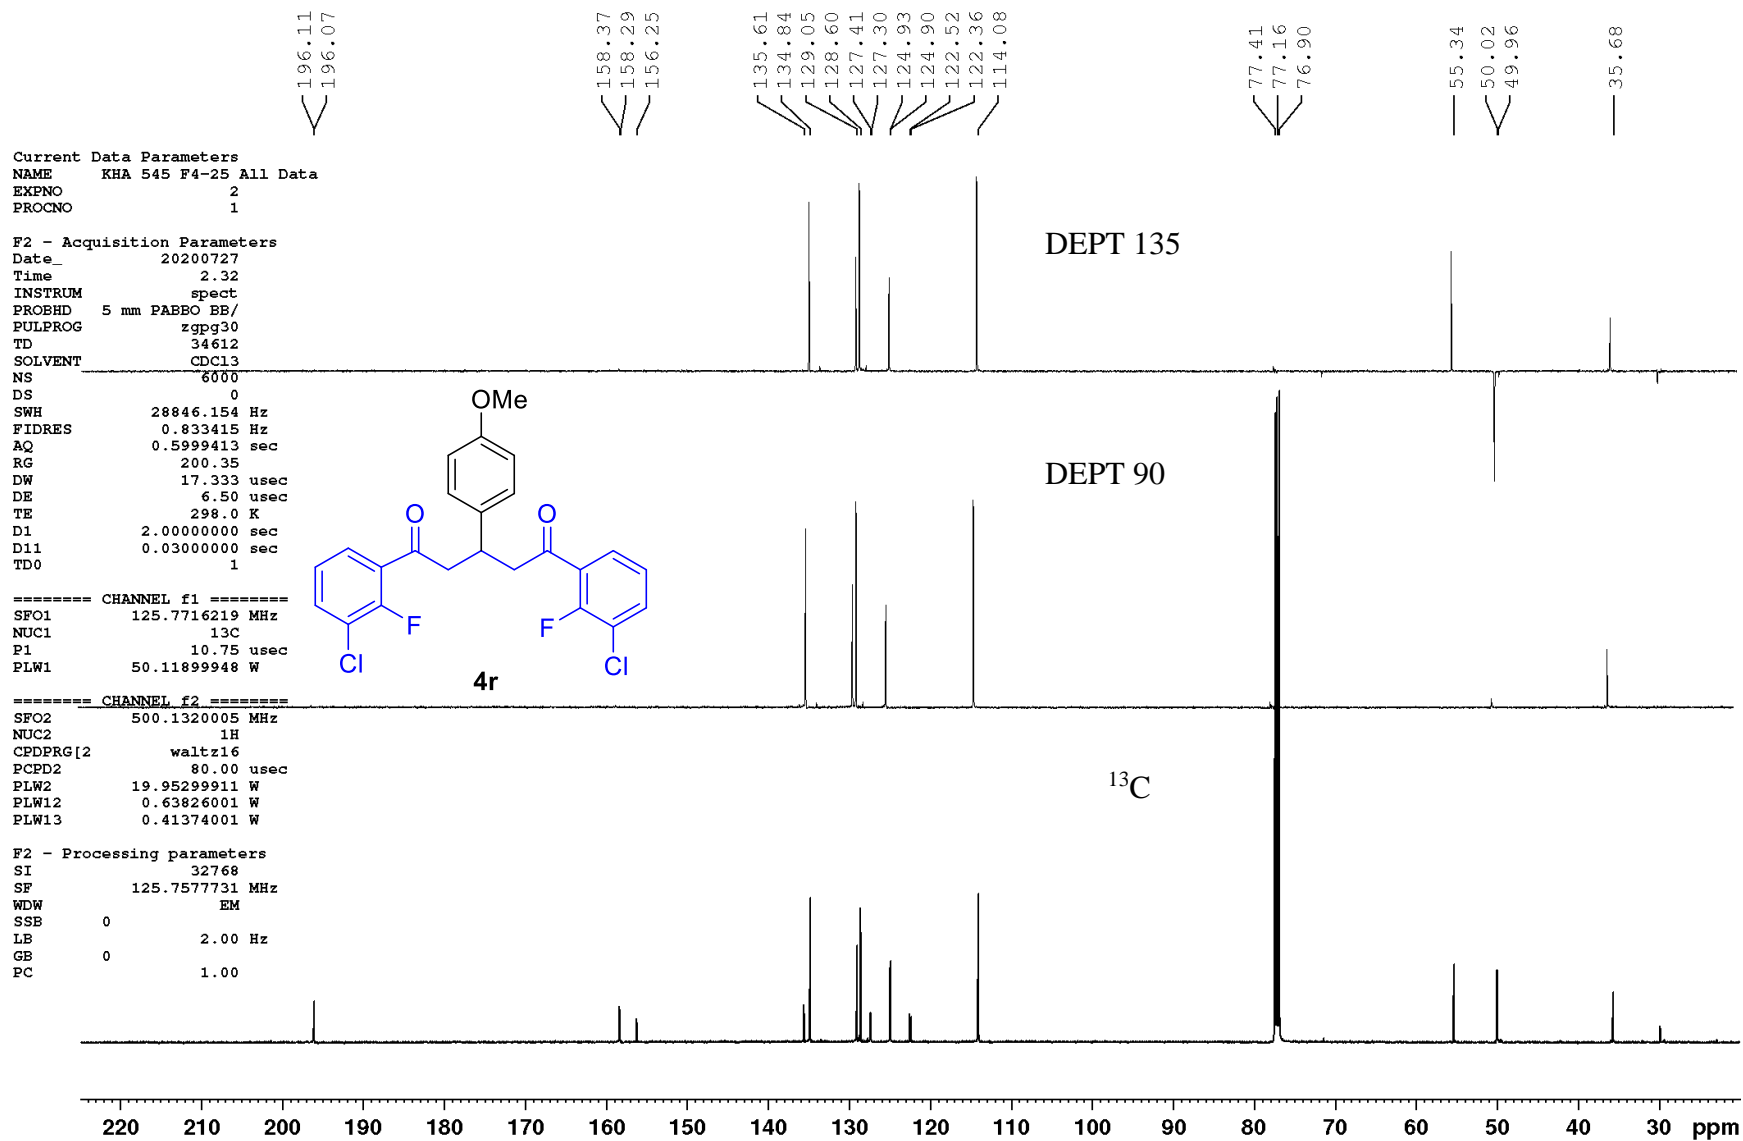

Figure S81. <sup>13</sup>C NMR spectrum of compound 4r (125 MHz, CDCl<sub>3</sub>, 25 °C)

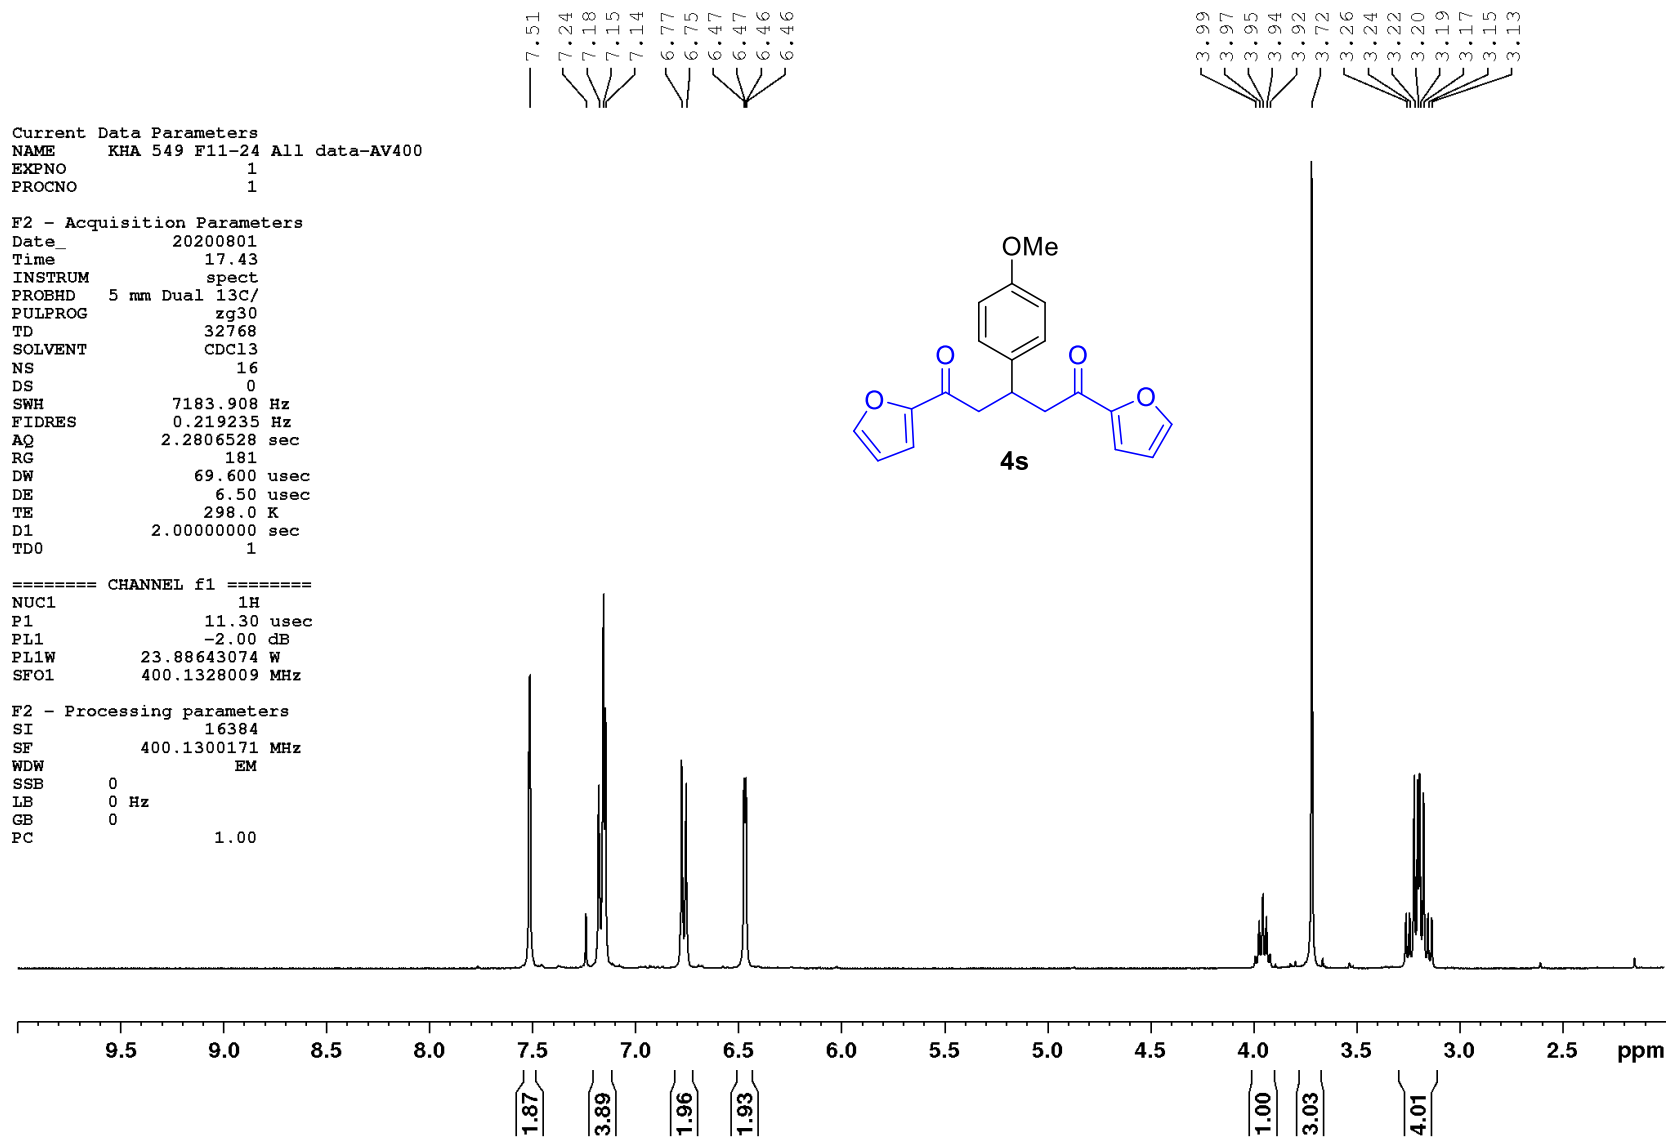

Figure S82. <sup>1</sup>H NMR spectrum of compound **4s** (500 MHz, CDCl<sub>3</sub>, 25 °C)

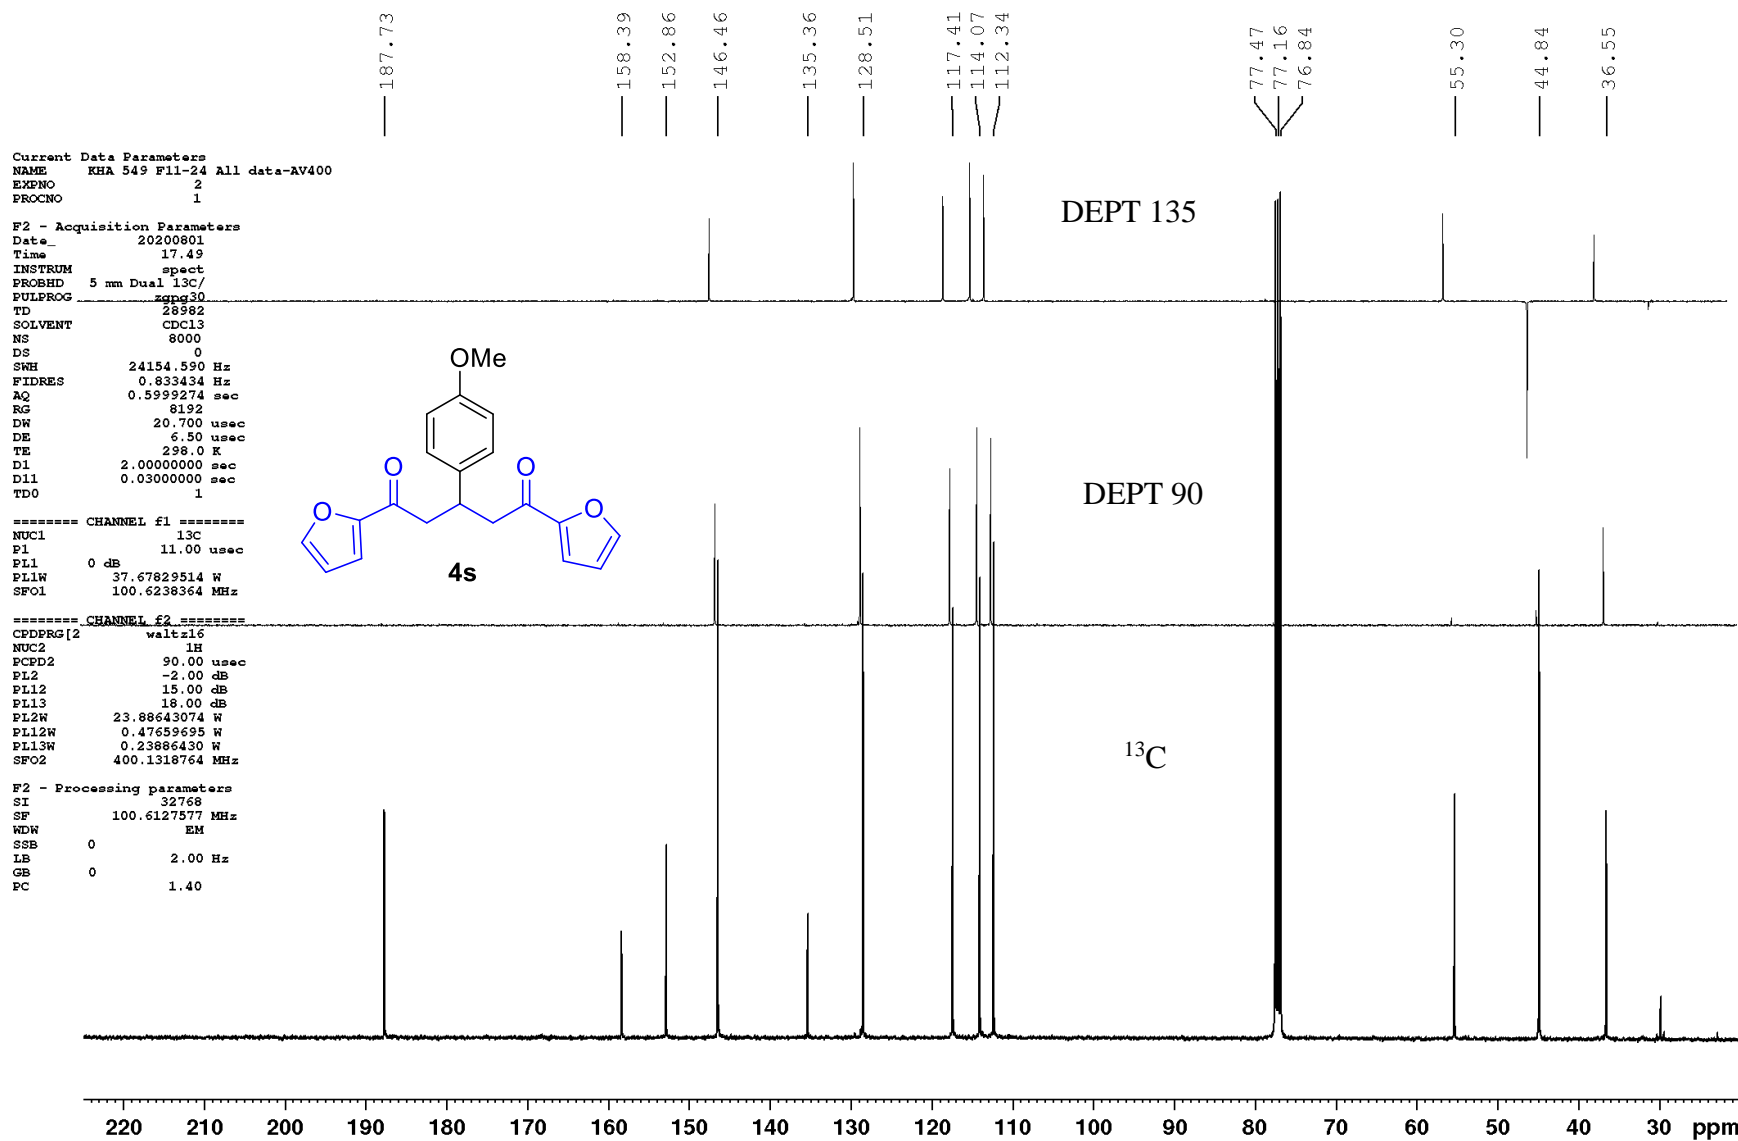

Figure S83. <sup>13</sup>C NMR spectrum of compound 4s (125 MHz, CDCl<sub>3</sub>, 25 °C)

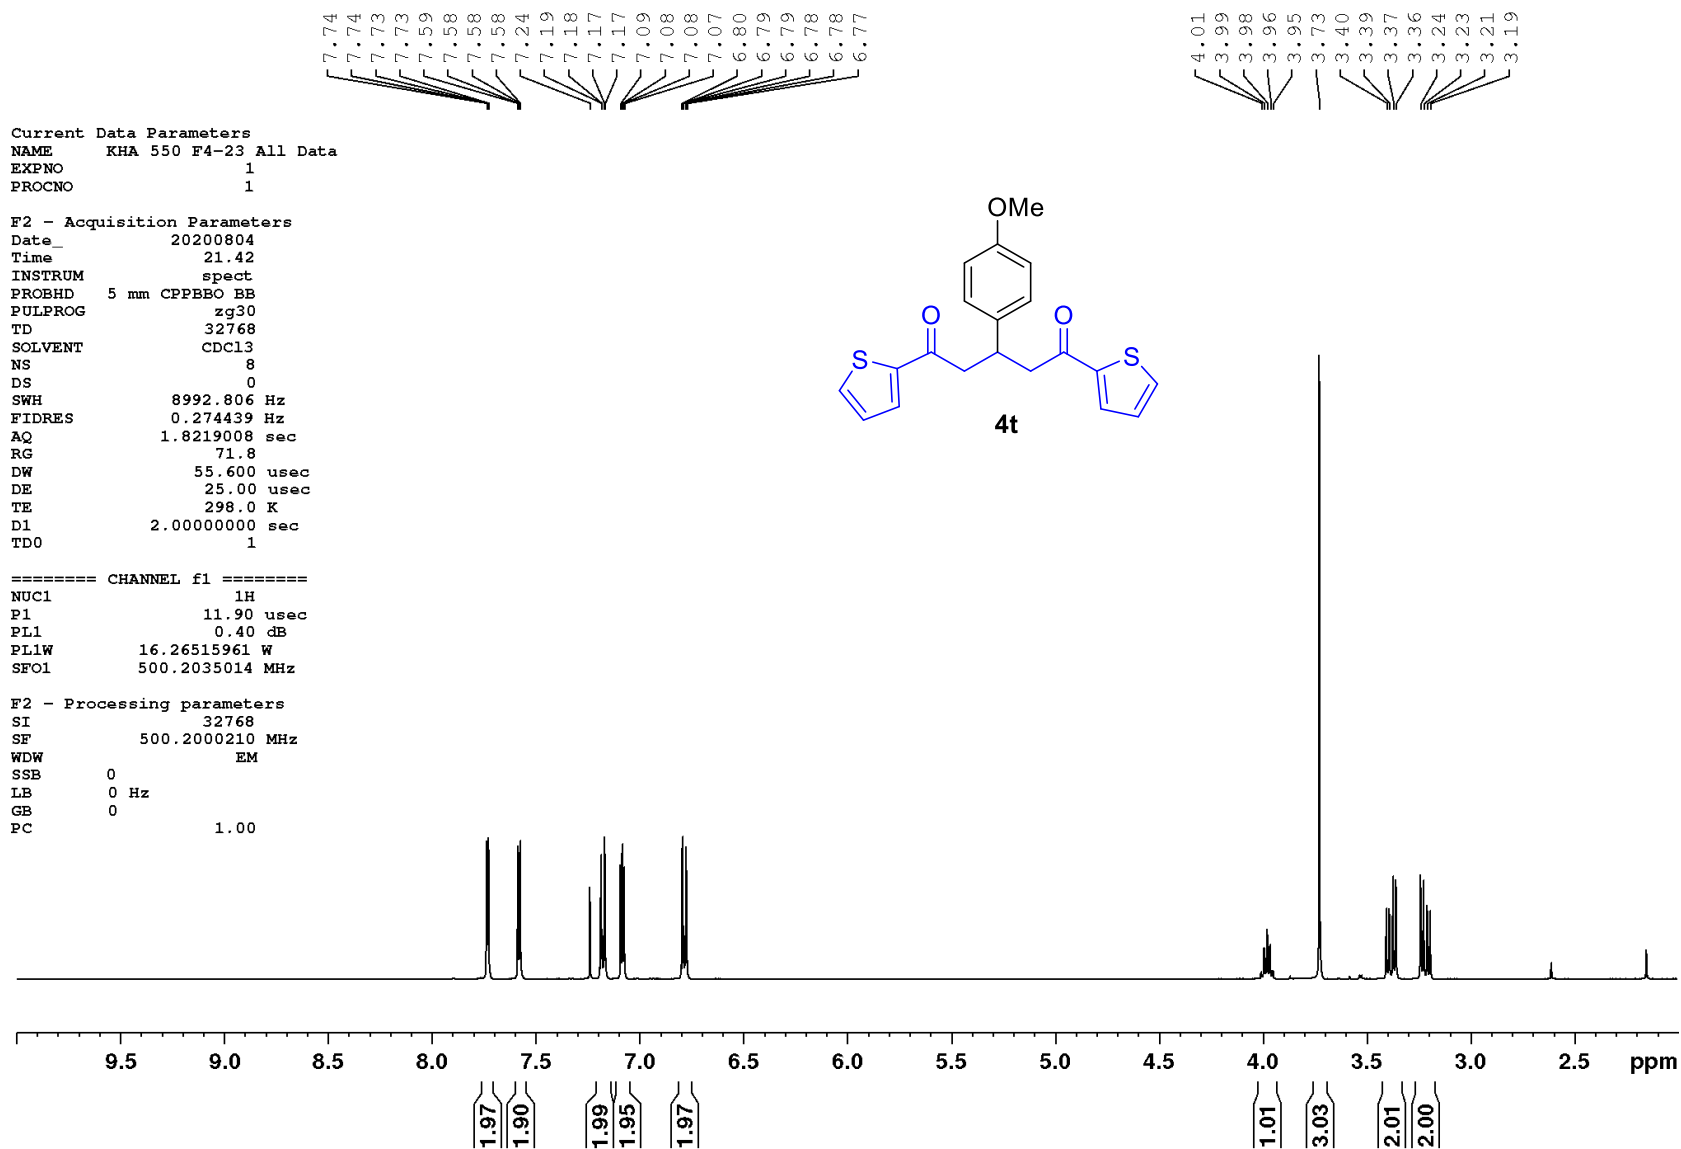

Figure S84.  $^1\text{H}$  NMR spectrum of compound **4t** (500 MHz,  $\text{CDCl}_3$ , 25  $^\circ\text{C}$ )

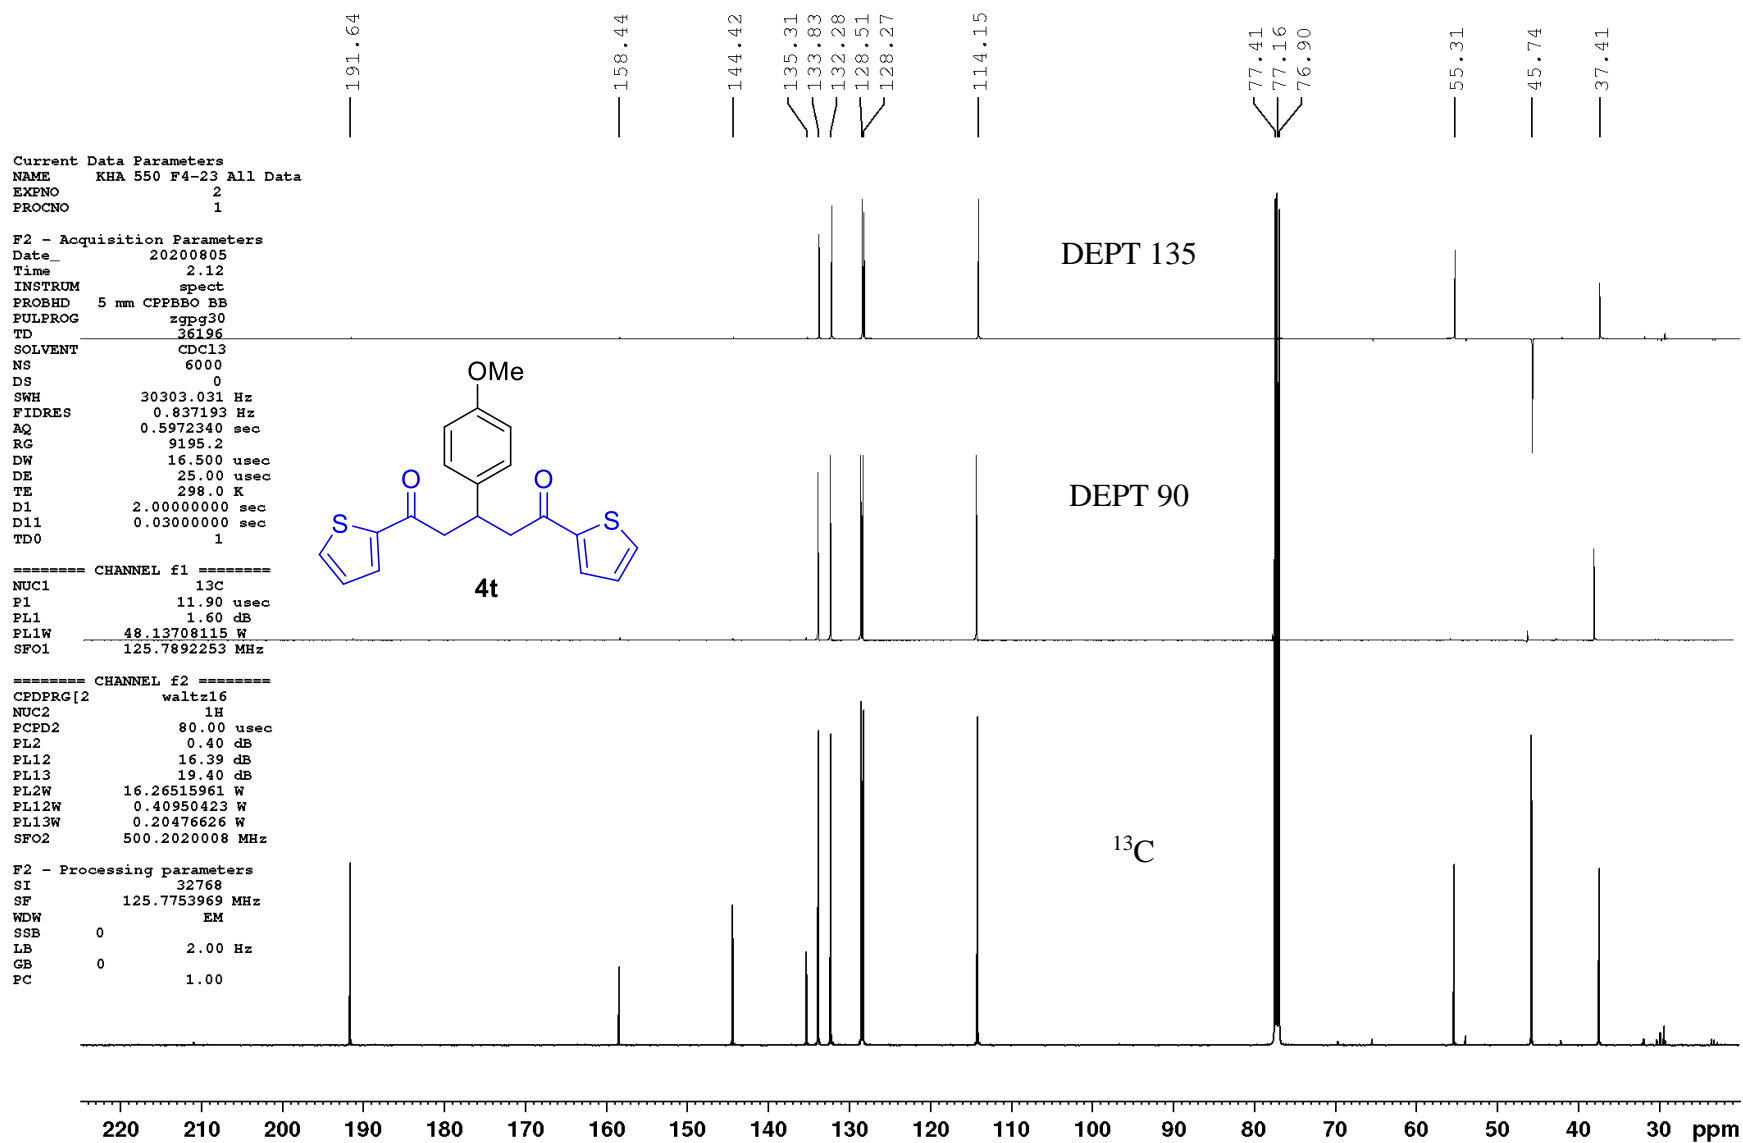

Figure S85.  $^{13}\text{C}$  NMR spectrum of compound **4t** (125 MHz,  $\text{CDCl}_3$ , 25  $^\circ\text{C}$ )

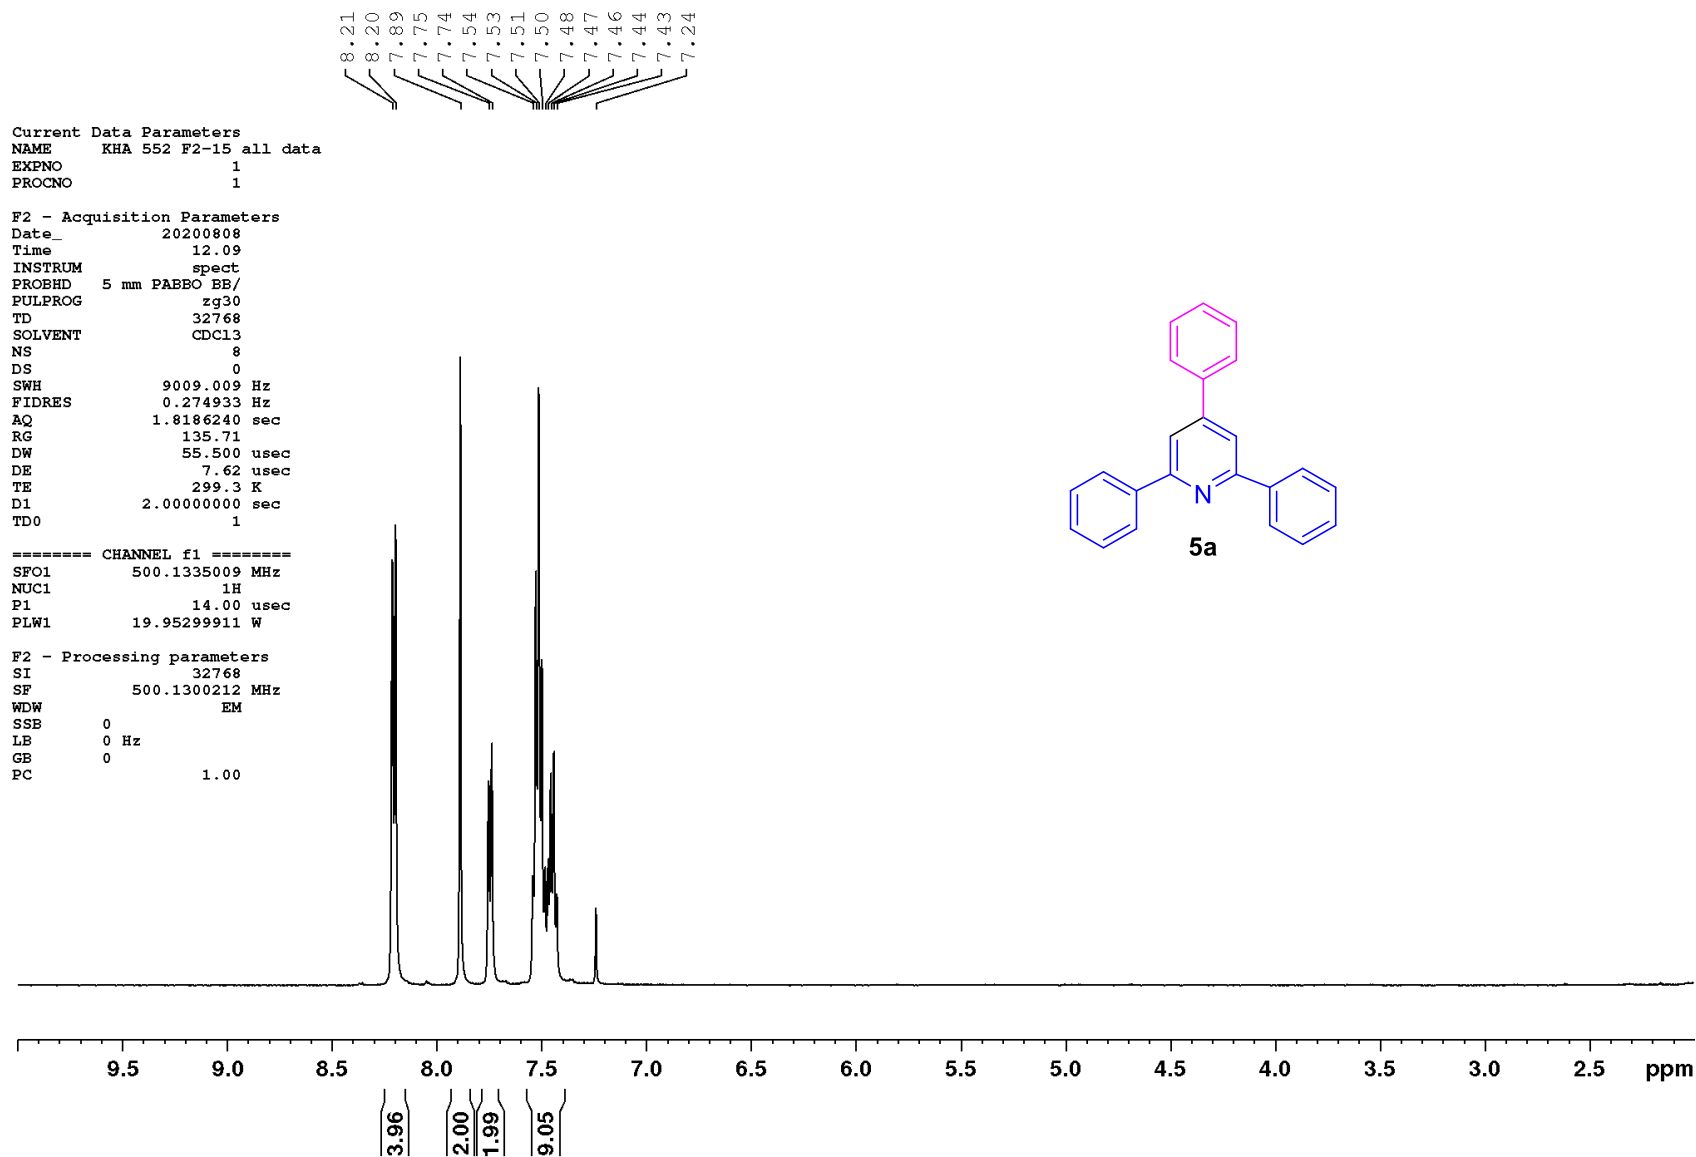

Figure S86. <sup>1</sup>H NMR spectrum of compound **5a** (500 MHz, CDCl<sub>3</sub>, 25 °C)



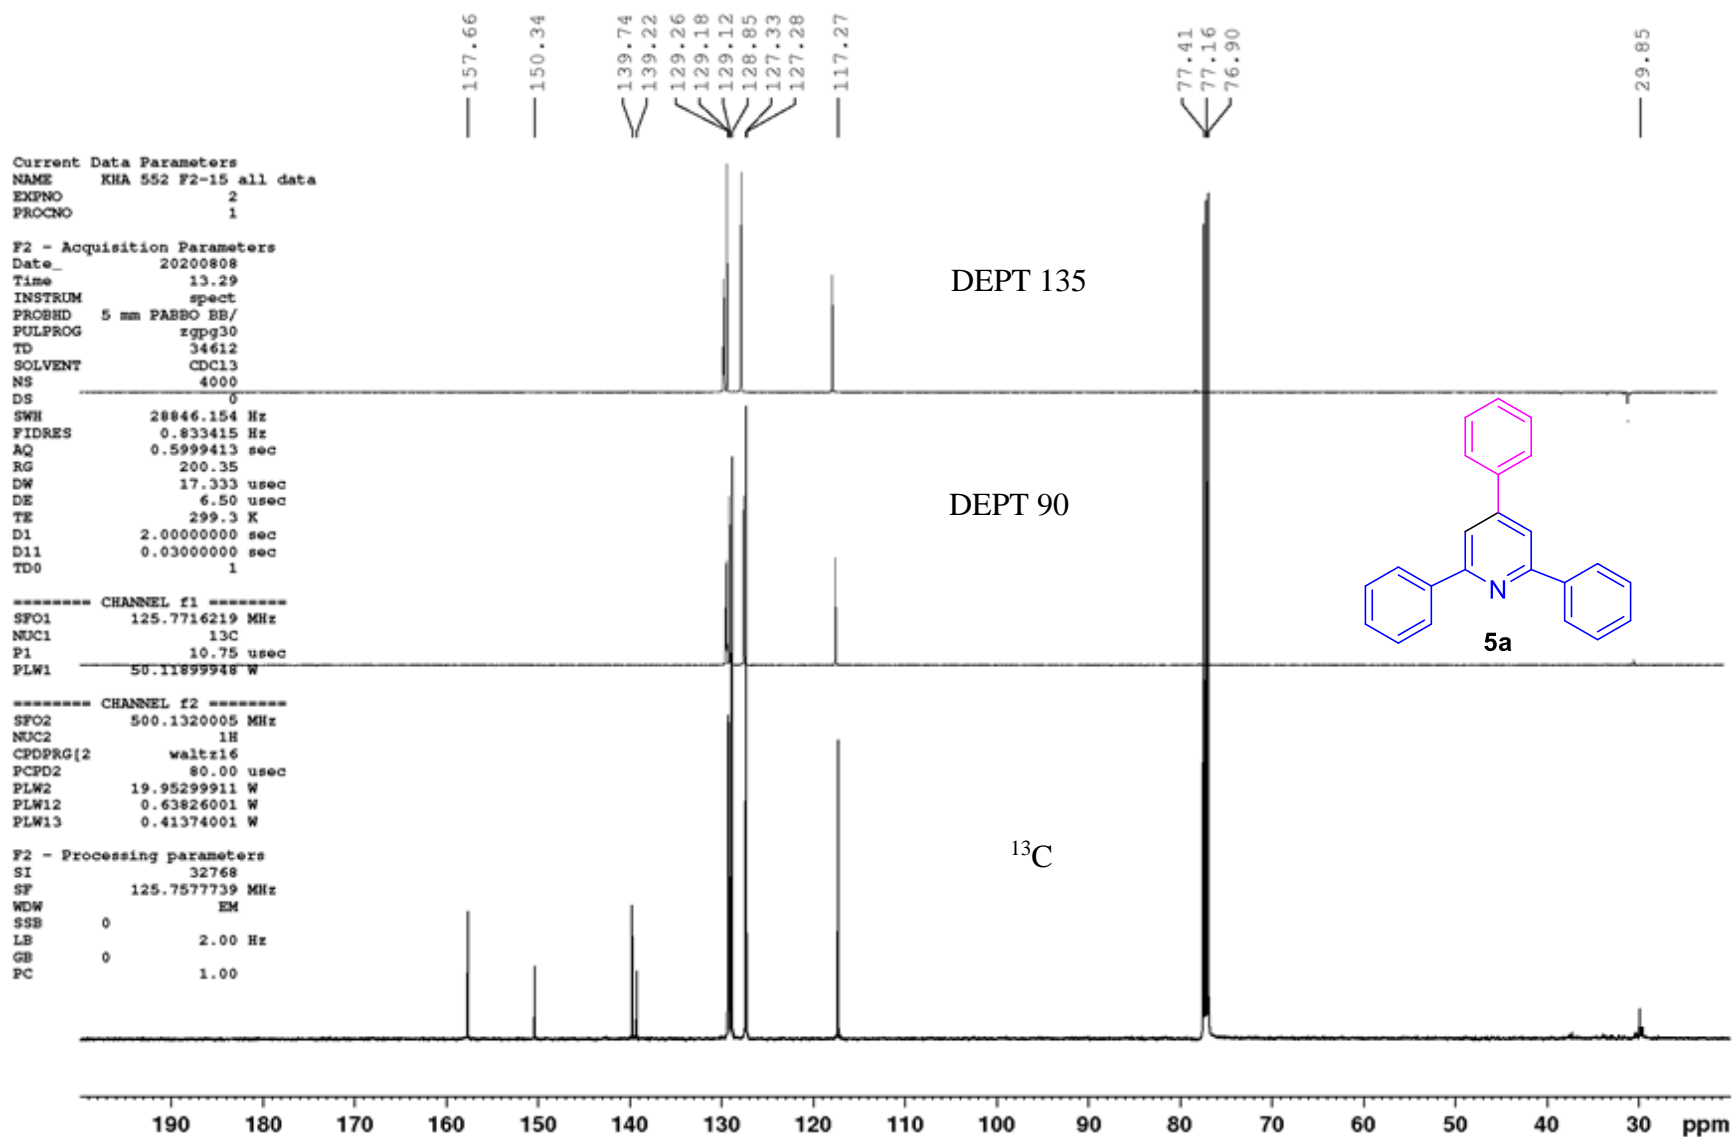

Figure S87. <sup>13</sup>C NMR spectrum of compound **5a** (125 MHz, CDCl<sub>3</sub>, 25 °C)

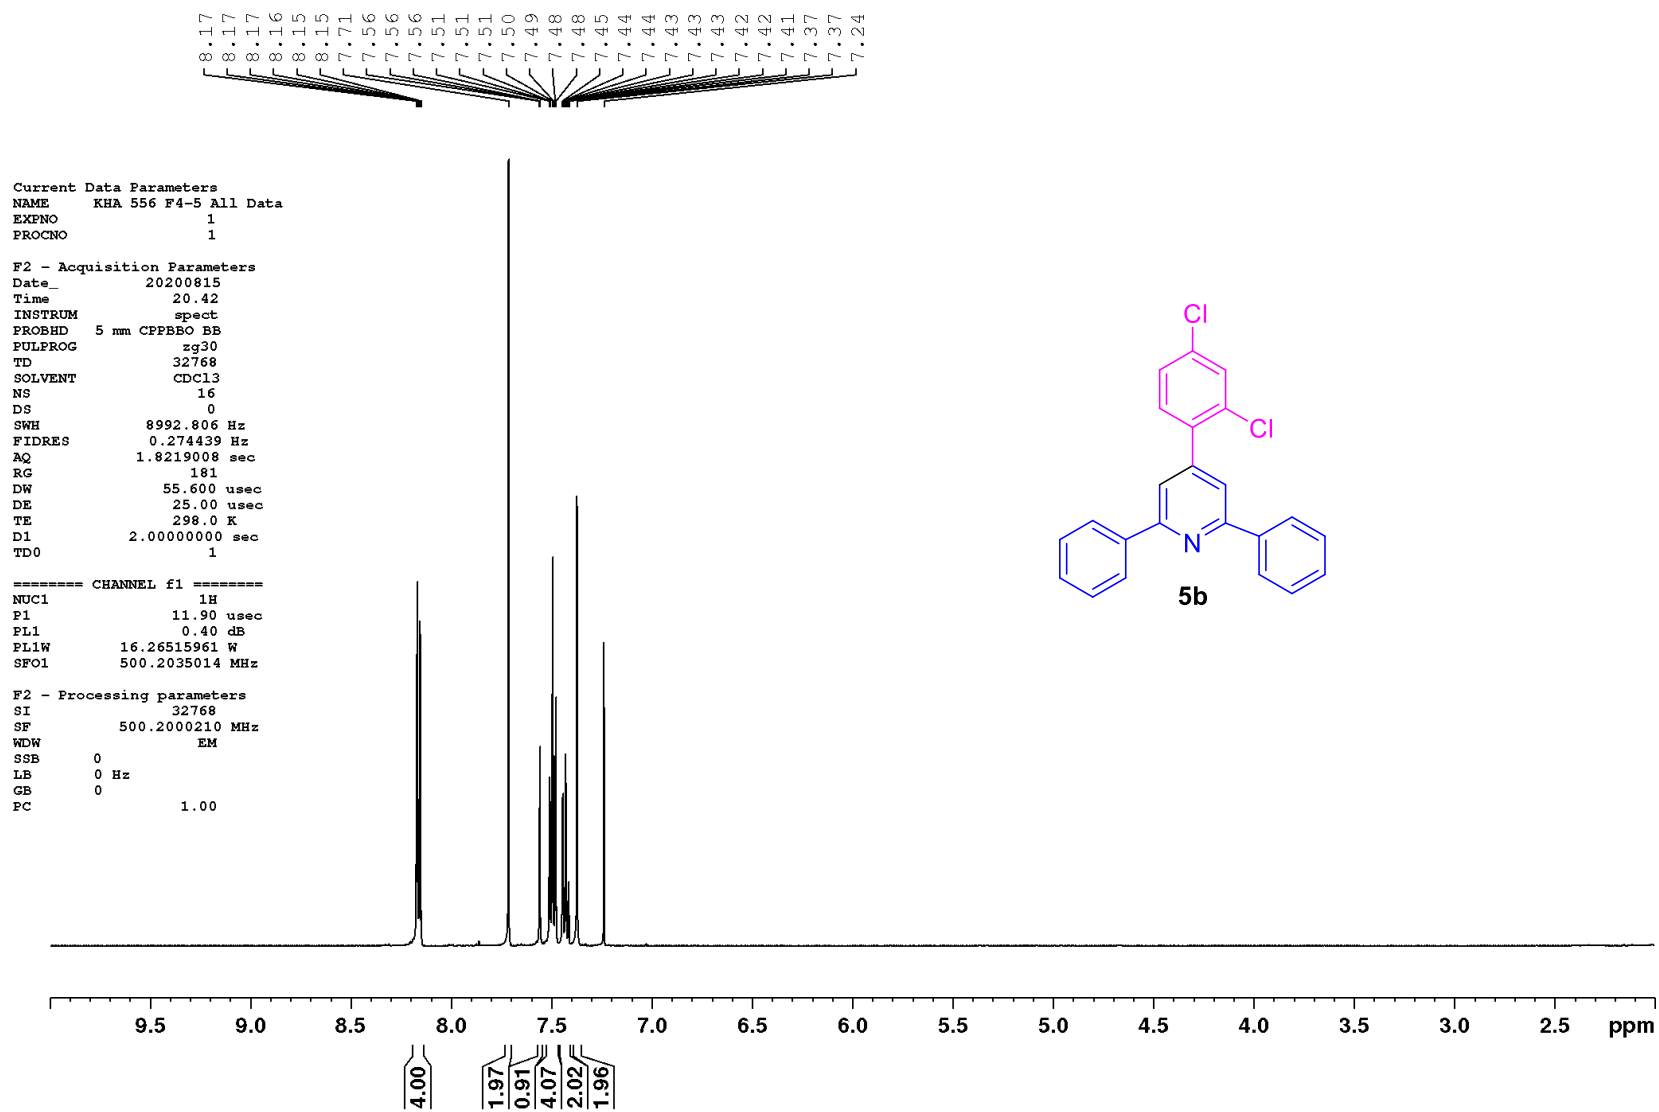

Figure S88. <sup>1</sup>H NMR spectrum of compound **5b** (500 MHz, CDCl<sub>3</sub>, 25 °C)

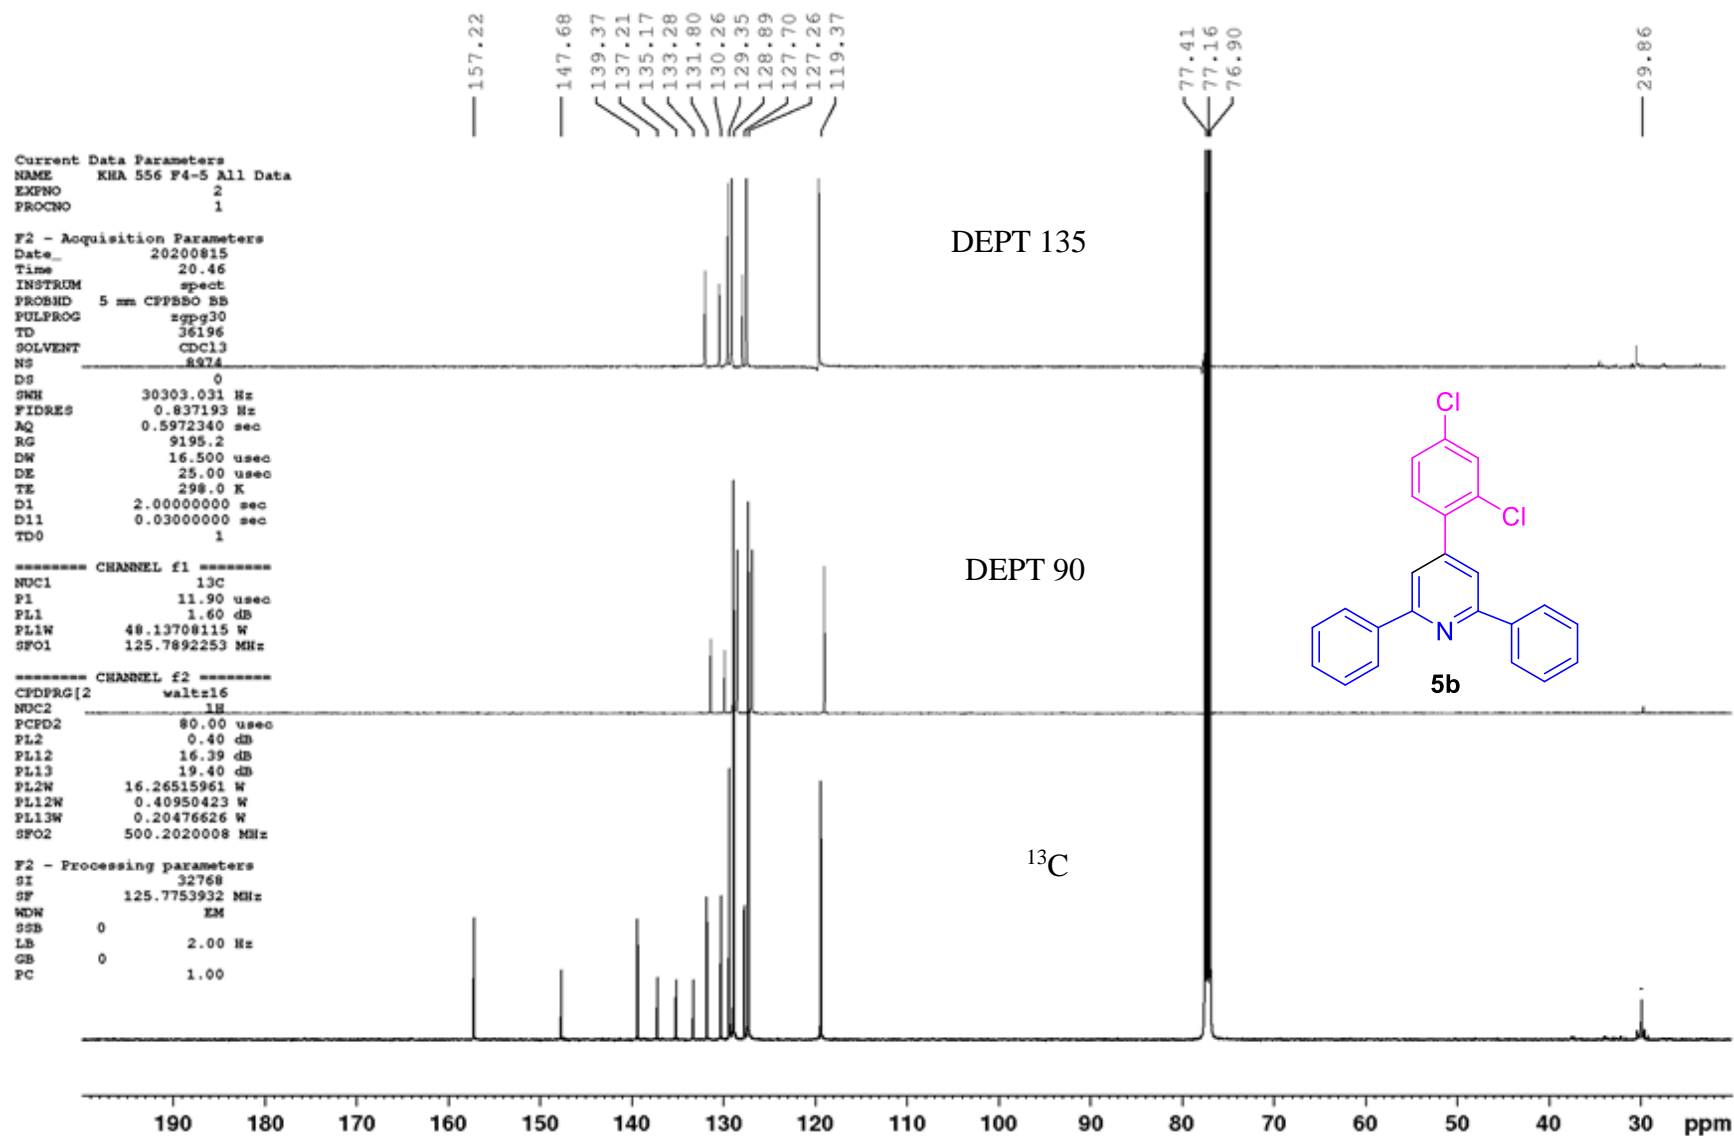

Figure S89. <sup>13</sup>C NMR spectrum of compound **5b** (125 MHz, CDCl<sub>3</sub>, 25 °C)

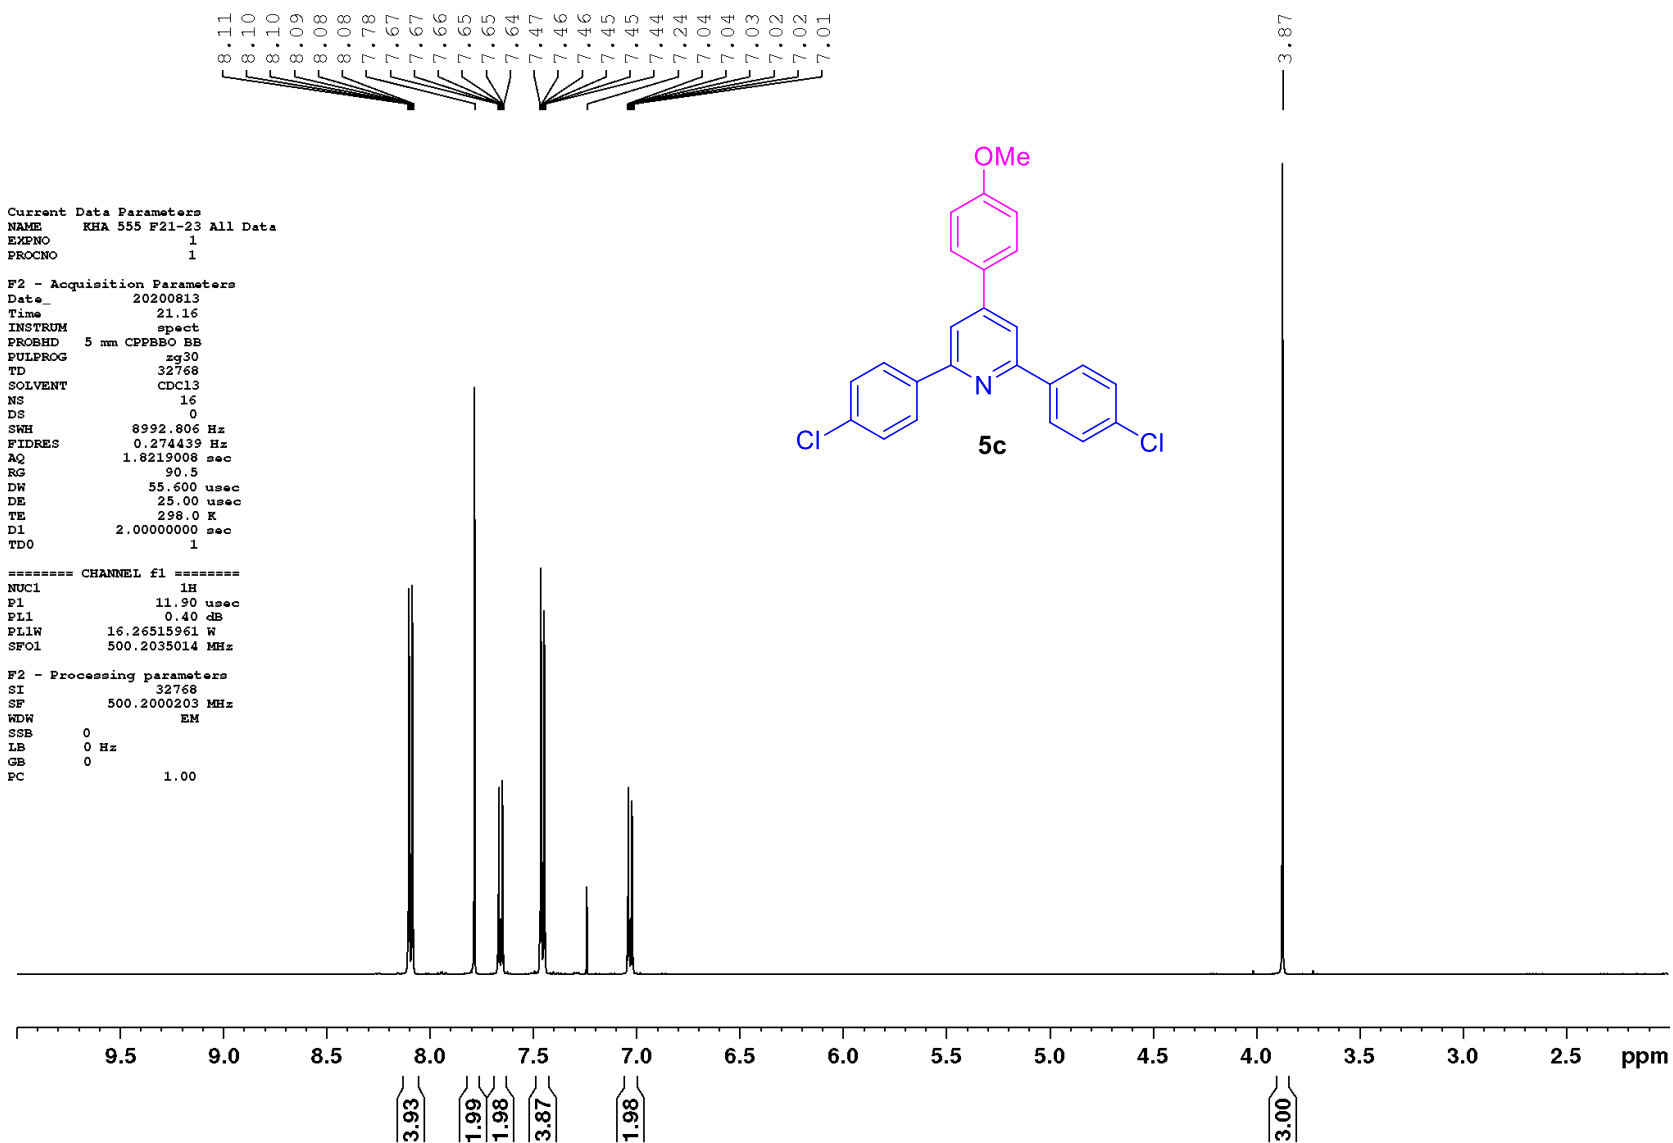

Figure S90. <sup>1</sup>H NMR spectrum of compound **5c** (500 MHz, CDCl<sub>3</sub>, 25 °C)

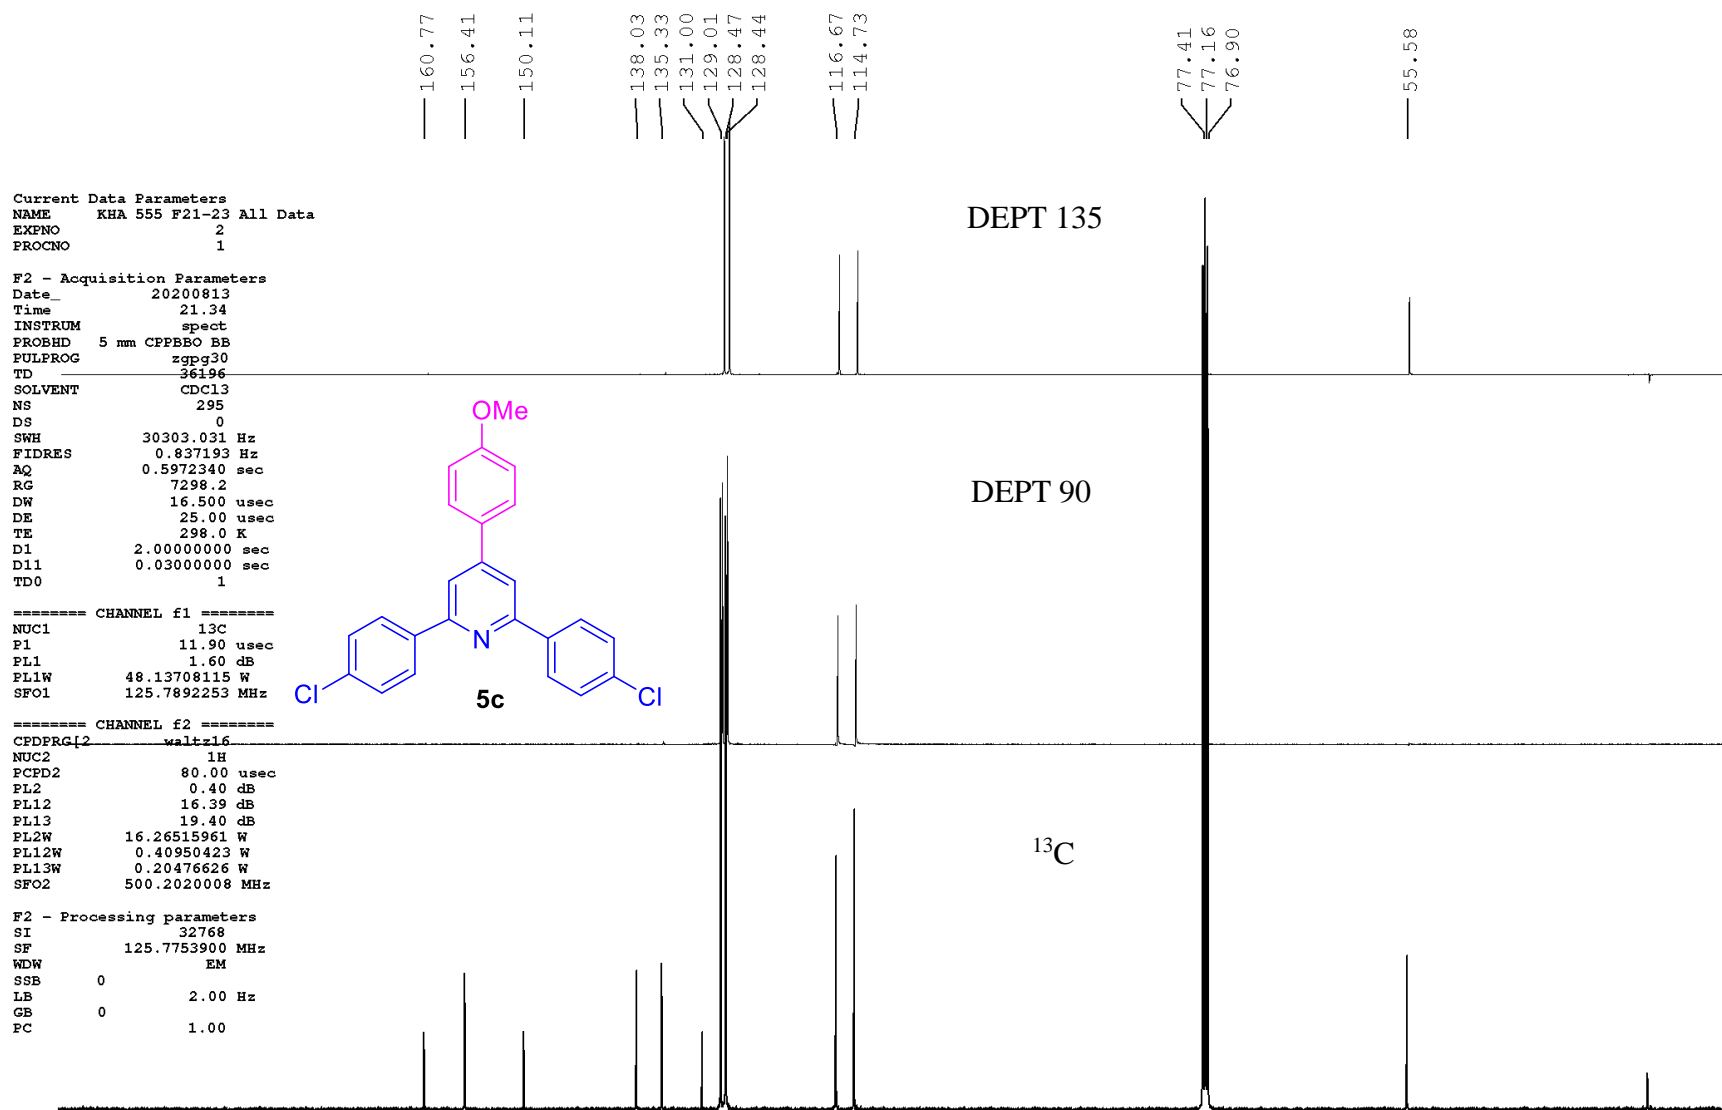

Figure S91. <sup>13</sup>C NMR spectrum of compound **5c** (125 MHz, CDCl<sub>3</sub>, 25 °C)

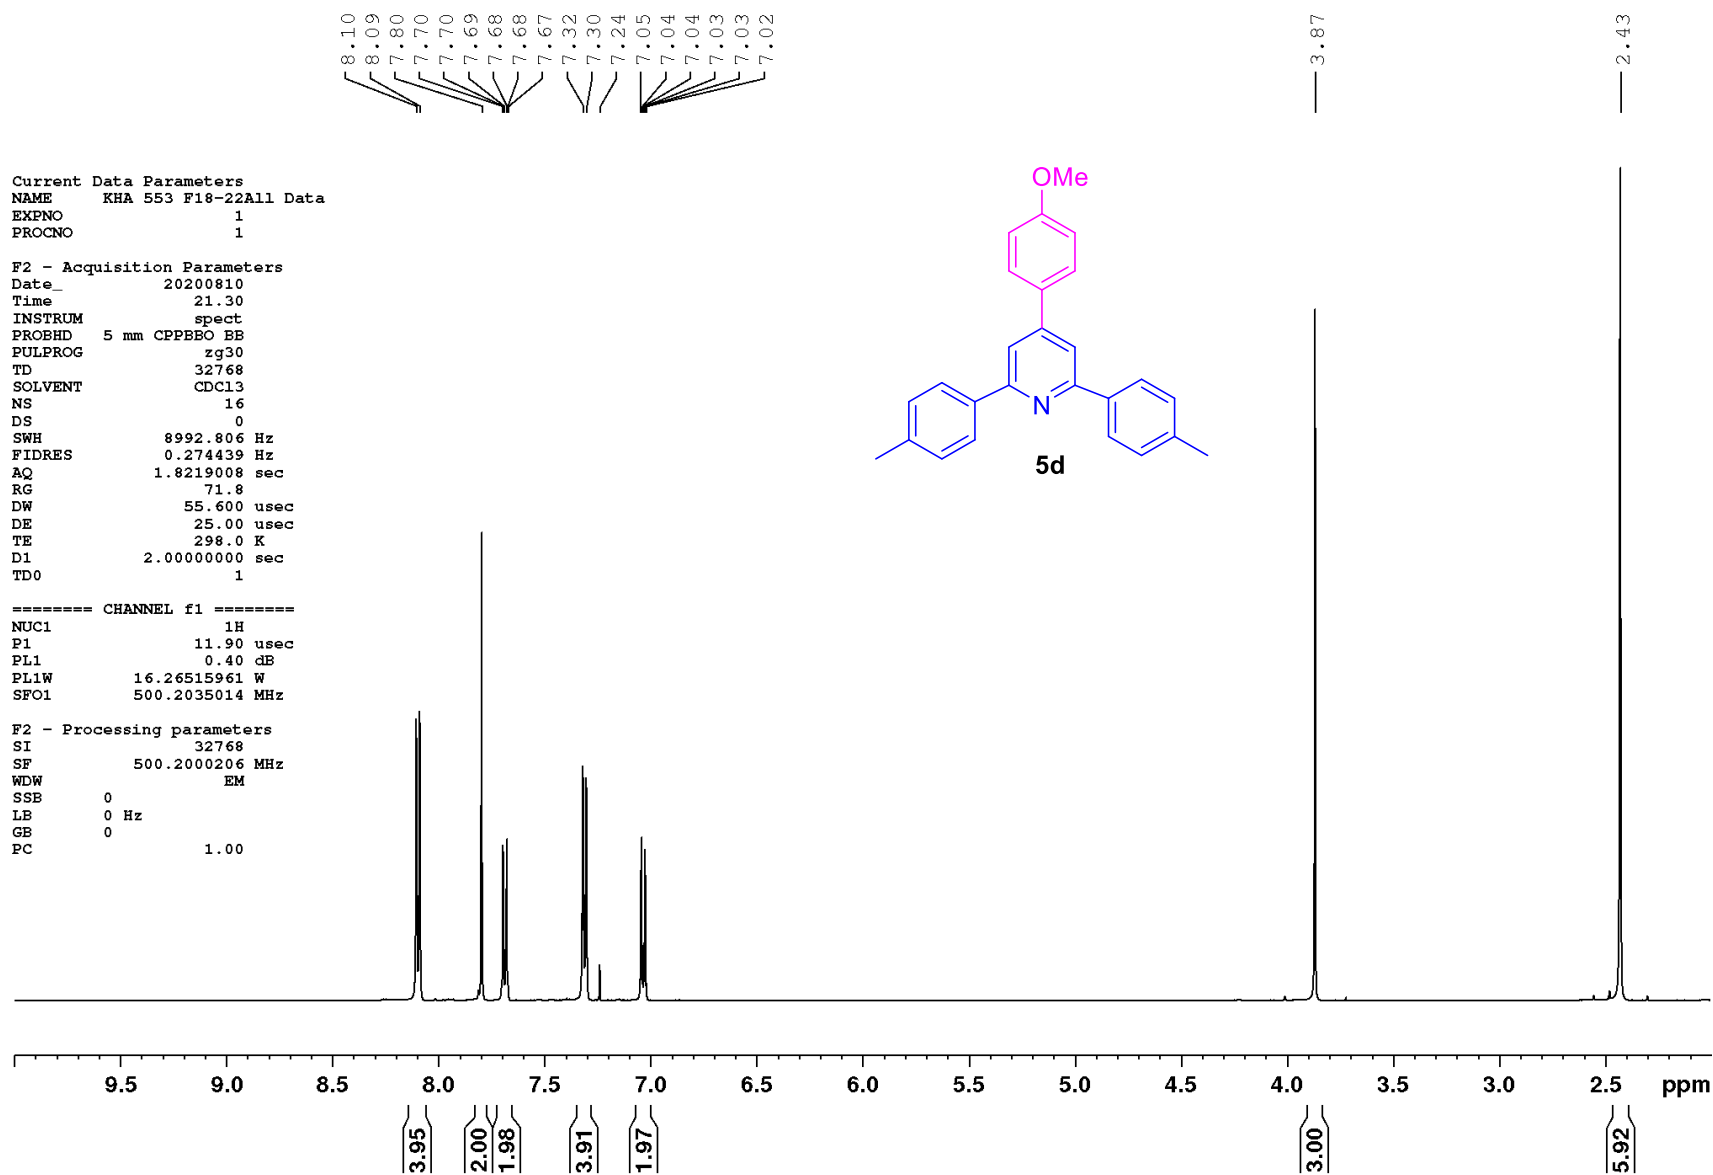

Figure S92. <sup>1</sup>H NMR spectrum of compound **5d** (500 MHz, CDCl<sub>3</sub>, 25 °C)

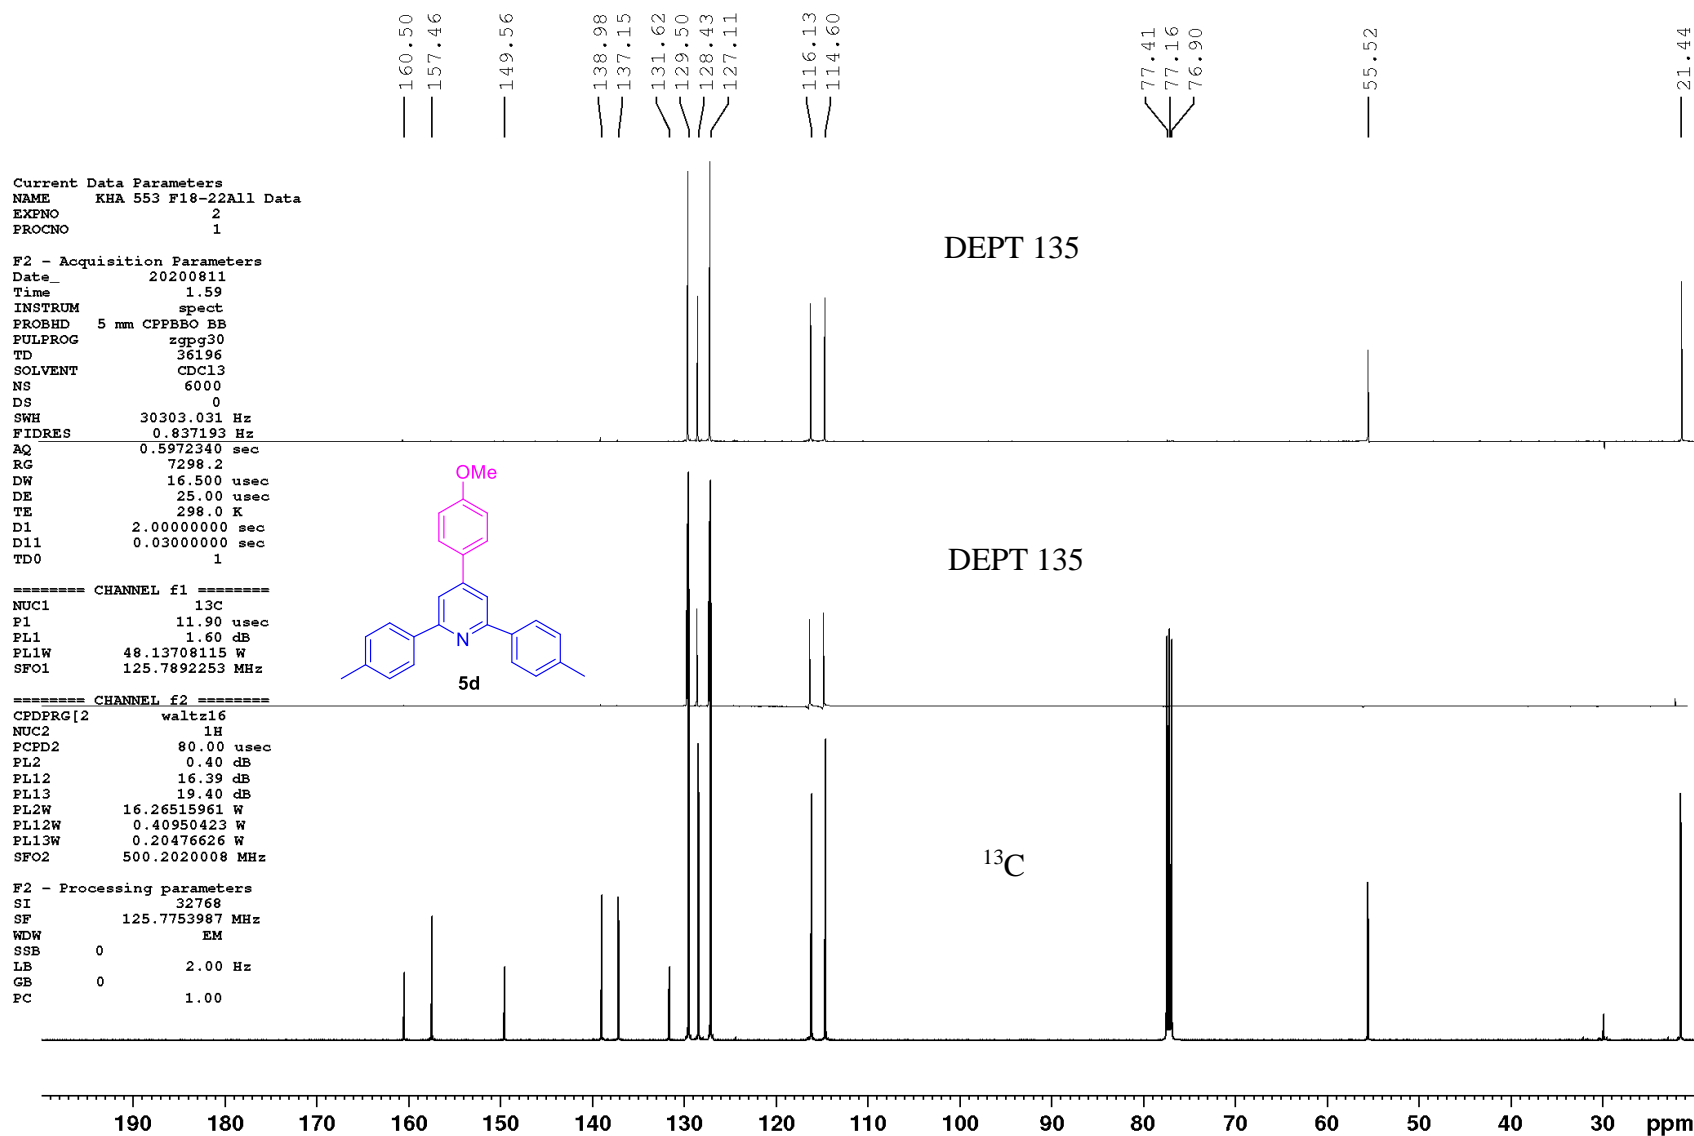

Figure S93.  $^{13}\text{C}$  NMR spectrum of compound **5d** (125 MHz,  $\text{CDCl}_3$ , 25  $^\circ\text{C}$ )

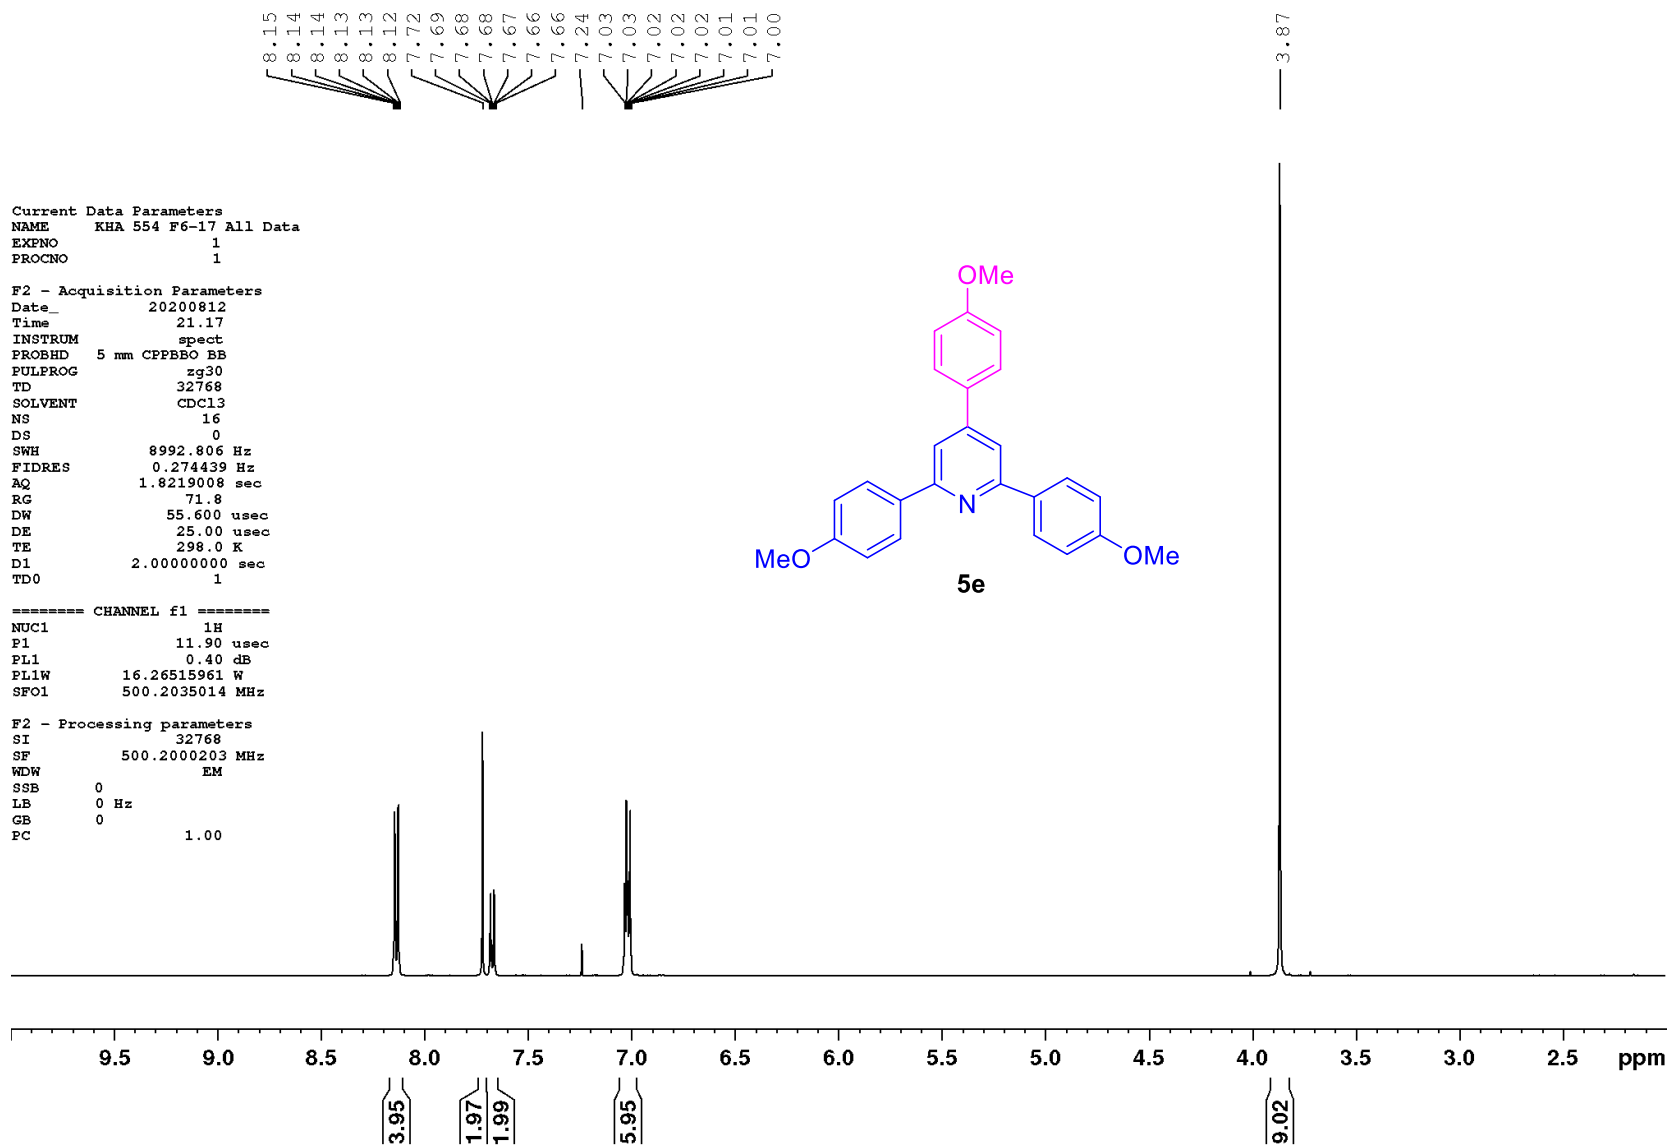

Figure S94. <sup>1</sup>H NMR spectrum of compound **5e** (500 MHz, CDCl<sub>3</sub>, 25 °C)



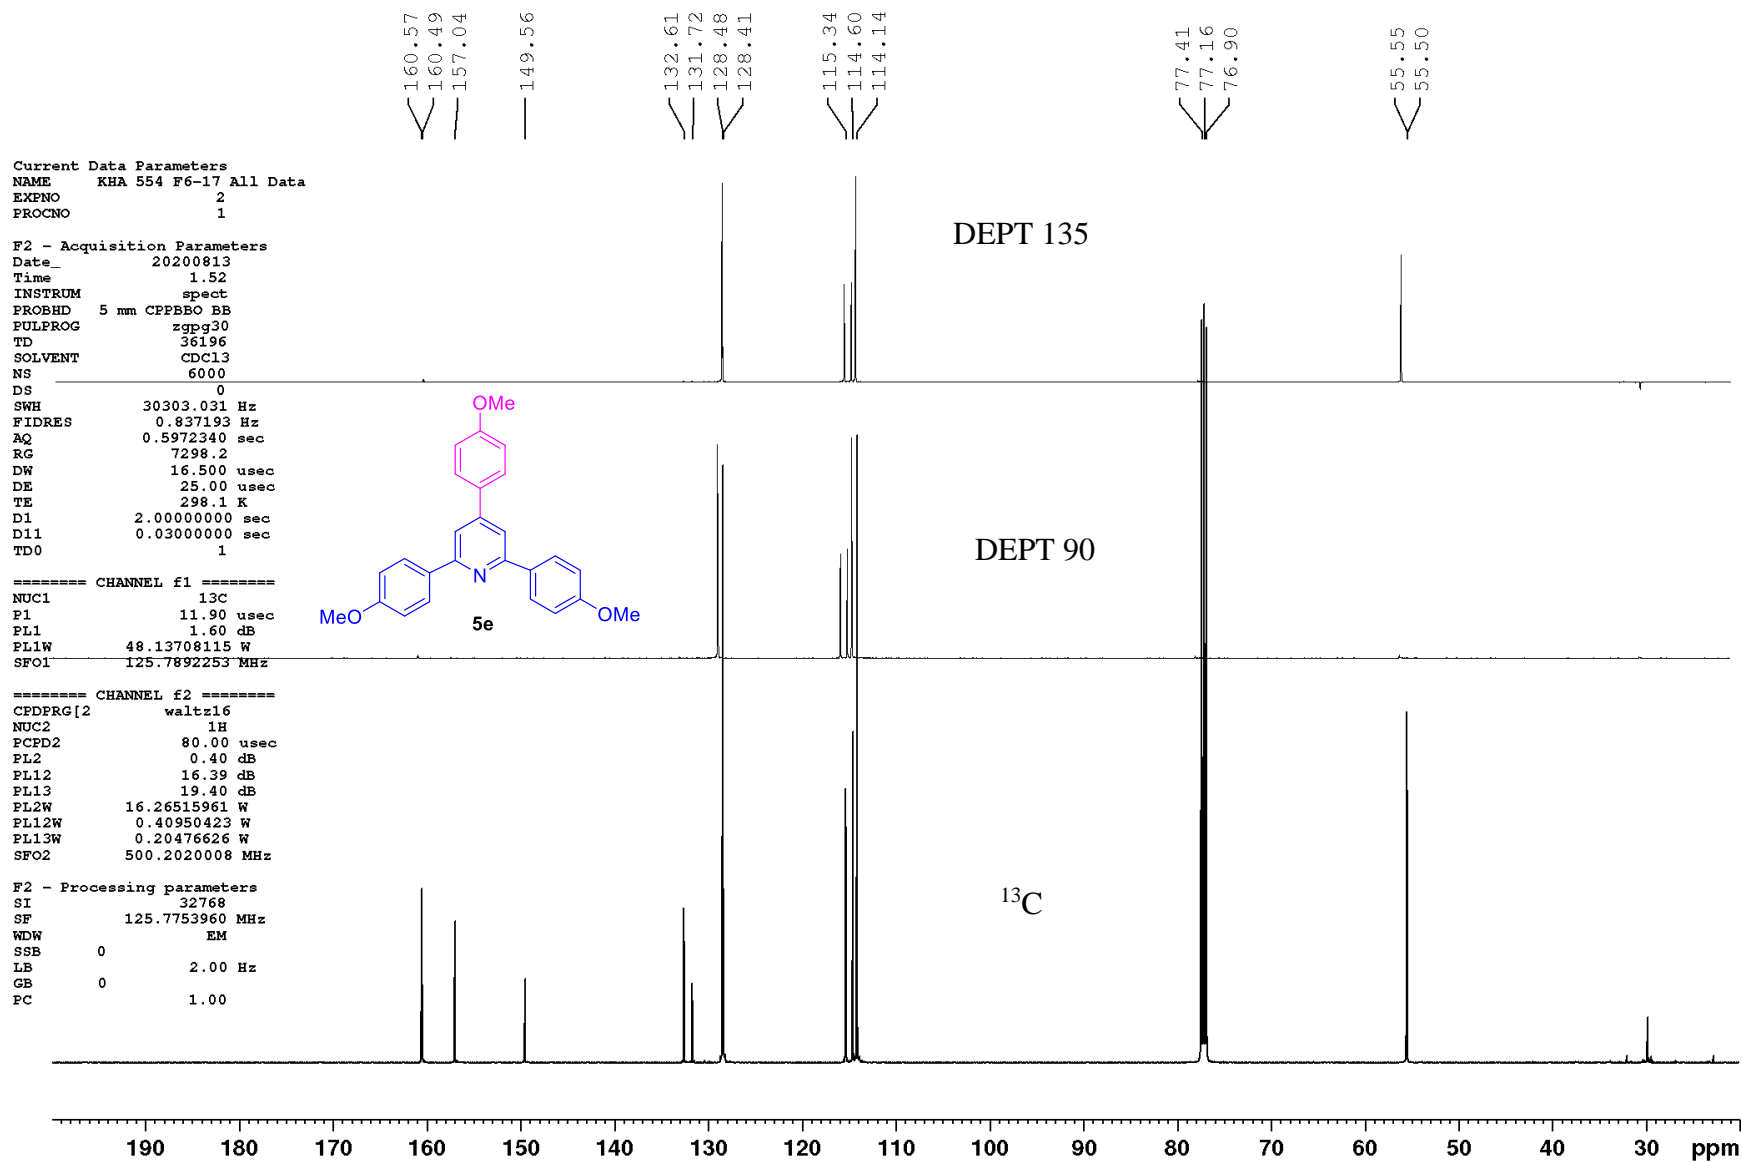

Figure S95. <sup>13</sup>C NMR spectrum of compound **5e** (125 MHz, CDCl<sub>3</sub>, 25 °C)
